# Supplementary material for: RNA-seq Reveals the Overexpression of IGSF9 in Endometrial Cancer
Source: J Oncol. 2018 Feb 14;2018:2439527. doi: 10.1155/2018/2439527 (PMC5832105; doi:10.1155/2018/2439527)
Supplement: Supplementary 1 — Supplementary Table 1: QC and alignment results. [file 2439527.f1.xlsx]

## Sheet: Sheet1
Sample	Input	Reads alignment						Reads genomic origin			Transcript coverage profile
		reads aligned (left/right)	read pairs aligned	total alignments	secondary alignments	non-unique alignments	aligned to genes	exonic	intronic	intergenic	5' bias	3' bias	5'-3' bias
R135	18154106	17,510,866 / 17,510,866	17510866	37387360	2365628	3699578	25159312	25,159,312 (80.65%)	4,042,892 (12.96%)	1,992,788 (6.39%)	0.73	0.26	1.35
R135N	15174670	14,682,908 / 14,682,908	14682908	31056434	1690618	2638472	20278940	20,278,940 (79.08%)	3,632,246 (14.16%)	1,731,844 (6.75%)	0.7	0.29	1.33
R141	11751082	11,235,105 / 11,235,105	11235105	23614552	1144342	1611100	14839626	14,839,626 (79.55%)	3,034,704 (16.27%)	781,222 (4.19%)	0.75	0.28	1.4
R141N	18667419	17,707,600 / 17,707,600	17707600	37248450	1833250	2914102	24889506	24,889,506 (79.43%)	4,758,608 (15.19%)	1,686,620 (5.38%)	0.67	0.28	1.42
R207	16654869	16,218,555 / 16,218,555	16218555	34082860	1645750	2595104	24199586	24,199,586 (85.03%)	3,314,024 (11.65%)	945,060 (3.32%)	0.73	0.23	1.41
R207N	15412971	14,918,251 / 14,918,251	14918251	31306102	1469600	2366952	21526620	21,526,620 (80.3%)	3,822,578 (14.26%)	1,458,134 (5.44%)	0.74	0.25	1.41
R300	9948089	9,574,901 / 9,574,901	9574901	19985128	835326	1318386	13536010	13,536,010 (78.23%)	2,987,252 (17.26%)	779,116 (4.5%)	0.72	0.23	1.49
R300N	21426556	20,650,616 / 20,650,616	20650616	43288040	1986808	3064400	28735150	28,735,150 (77.32%)	6,574,776 (17.69%)	1,856,406 (4.99%)	0.72	0.25	1.38
R356	21228446	20,532,833 / 20,532,833	20532833	43147274	2081608	3430420	30449252	30,449,252 (82.25%)	5,070,508 (13.7%)	1,502,810 (4.06%)	0.7	0.27	1.32
R356N	21230350	20,665,558 / 20,665,558	20665558	43022128	1691012	2723016	30500166	30,500,166 (81.01%)	5,511,002 (14.64%)	1,640,894 (4.36%)	0.66	0.24	1.38
R362	24540469	23,841,990 / 23,841,990	23841990	49787710	2103730	3347826	36263814	36,263,814 (83.6%)	5,497,542 (12.67%)	1,618,124 (3.73%)	0.72	0.23	1.52
R362N	20959508	20,434,942 / 20,434,942	20434942	42713236	1843352	2872882	30191164	30,191,164 (81.87%)	5,081,052 (13.78%)	1,605,034 (4.35%)	0.7	0.25	1.4
R532	18913540	18,348,256 / 18,348,256	18348256	38675328	1978816	3165324	26996644	26,996,644 (81.37%)	4,406,838 (13.28%)	1,772,518 (5.34%)	0.67	0.28	1.4
R532N	15279178	14,705,221 / 14,705,221	14705221	30836548	1426106	2231556	20951868	20,951,868 (81.45%)	3,685,200 (14.33%)	1,088,050 (4.23%)	0.73	0.28	1.38
