# Supplementary material for: RNA-seq Reveals the Overexpression of IGSF9 in Endometrial Cancer
Source: J Oncol. 2018 Feb 14;2018:2439527. doi: 10.1155/2018/2439527 (PMC5832105; doi:10.1155/2018/2439527)
Supplement: Supplementary 2 — Supplementary Table 2: differentially expressed genes as paired tissues. [file 2439527.f2.csv]

	baseMean	log2FoldChange	lfcSE	stat	pvalue	padj
EGR1	22839.37408	-1.999940347	0.317639588	-6.29625658	3.05E-10	4.54E-06
FOSB	5928.657553	-2.465095568	0.403449074	-6.110053854	9.96E-10	7.41E-06
PTPRT	26.13788583	-2.697002883	0.449347144	-6.002047461	1.95E-09	9.67E-06
SELE	456.6429695	-1.839715871	0.326091521	-5.641716365	1.68E-08	6.27E-05
FOS	22562.62116	-2.012395557	0.367006086	-5.483275716	4.18E-08	0.000124313
ENPP2	3262.546997	-1.554414952	0.292867633	-5.307568261	1.11E-07	0.000235167
TFPI	393.084087	-1.382498307	0.261637227	-5.284027511	1.26E-07	0.000235167
ZFP36	13841.34533	-1.853231777	0.349035914	-5.309573322	1.10E-07	0.000235167
HNMT	859.2822434	-0.887379346	0.170202895	-5.213656008	1.85E-07	0.00027564
PIM1	779.3122401	-0.835281316	0.159988951	-5.220868773	1.78E-07	0.00027564
ATP13A2	796.2009272	0.913372899	0.182013566	5.018158369	5.22E-07	0.000706038
PTPRF	6677.77974	0.904618433	0.185457844	4.877757725	1.07E-06	0.001331129
CH25H	78.2592989	-1.435038396	0.296086646	-4.84668395	1.26E-06	0.001437651
GCHFR	354.8431673	1.204203485	0.249722276	4.822170861	1.42E-06	0.001496175
VSIG2	71.37523876	-1.71350688	0.356221058	-4.810234666	1.51E-06	0.001496175
TUBB3	982.3949317	2.177344453	0.459176452	4.74184694	2.12E-06	0.001970468
MRAP2	136.3373073	-0.86768515	0.184138867	-4.712123859	2.45E-06	0.002146778
ATF3	2008.582797	-1.733667797	0.371225059	-4.67012599	3.01E-06	0.002265778
CCL2	433.5104358	-0.786282892	0.168447183	-4.667830457	3.04E-06	0.002265778
DHCR7	570.9699359	0.935446672	0.199809404	4.681694915	2.85E-06	0.002265778
CLEC2B	150.9107098	-1.000531323	0.215341295	-4.646258493	3.38E-06	0.002396165
NAA10	536.0502642	0.401922256	0.087073311	4.615906415	3.91E-06	0.00264842
TNIP3	37.87298096	1.611211161	0.349819618	4.605834205	4.11E-06	0.002659049
FDPS	1339.572454	0.581510637	0.126974048	4.579759779	4.66E-06	0.002887521
ALDH4A1	377.3684407	0.69402745	0.153857499	4.510845781	6.46E-06	0.003623691
COL28A1	73.21384934	-1.160419918	0.257574725	-4.505177745	6.63E-06	0.003623691
DUS1L	1025.647895	0.420968115	0.09335659	4.509249033	6.51E-06	0.003623691
IDH2	2406.705565	1.29183514	0.287114778	4.499368325	6.82E-06	0.003623691
CPED1	955.9675463	-1.441555465	0.323287004	-4.459057892	8.23E-06	0.003829713
ETHE1	374.7003783	0.822699041	0.184276193	4.464489014	8.03E-06	0.003829713
PRELID1	282.4948724	0.546025815	0.12217324	4.469275063	7.85E-06	0.003829713
PRTG	221.7796134	-1.266634143	0.283374501	-4.469823997	7.83E-06	0.003829713
APOL4	709.4322071	1.283830089	0.289370851	4.436625466	9.14E-06	0.004122349
SMPDL3A	161.3671941	-0.812011824	0.183720953	-4.419810641	9.88E-06	0.004325436
ZBTB7C	151.6308	1.109091462	0.254941777	4.350371586	1.36E-05	0.005780708
BST2	3157.822077	1.688427657	0.393508012	4.29070719	1.78E-05	0.007239179
DUSP1	6854.1863	-1.65200729	0.385222193	-4.28845305	1.80E-05	0.007239179
IQSEC3	112.8680814	-1.683621747	0.394919677	-4.263200459	2.02E-05	0.007894795
C10orf10	1492.496147	-1.026189137	0.24229347	-4.235314875	2.28E-05	0.007901593
IGSF9	349.7912656	1.608684046	0.3792932	4.241267822	2.22E-05	0.007901593
KRT8	8810.390441	1.538557613	0.362162788	4.24824875	2.15E-05	0.007901593
PDS5B	900.31256	-0.727015563	0.17104573	-4.250416332	2.13E-05	0.007901593
TGFA	522.1853621	1.427116075	0.336688	4.238690044	2.25E-05	0.007901593
TUBA3D	49.43896763	-1.700886359	0.403659163	-4.21366964	2.51E-05	0.008500975
ALDH3B2	387.8501991	1.543262534	0.367223102	4.202520281	2.64E-05	0.00873237
ARRDC4	521.0582278	-0.897181859	0.214288365	-4.186796888	2.83E-05	0.008774608
LRRC70	29.97673198	-1.245232589	0.297337578	-4.187942189	2.81E-05	0.008774608
PTGES2	648.9734662	0.529311256	0.126168742	4.195264602	2.73E-05	0.008774608
KLF3-AS1	96.25624817	-1.279218254	0.306236707	-4.177220507	2.95E-05	0.008786097
PPP1R14B	821.7396178	1.097464904	0.262470478	4.181288926	2.90E-05	0.008786097
MALAT1	4432.15437	-0.859757707	0.206335391	-4.166797083	3.09E-05	0.009017121
ZNF704	2288.488408	-0.744512317	0.178897867	-4.161661229	3.16E-05	0.009045021
C1QTNF7	301.5181067	-1.629704246	0.393447303	-4.142115684	3.44E-05	0.009078791
EIF4EBP1	281.7984015	0.953068442	0.23148147	4.117255882	3.83E-05	0.009078791
FGF2	467.0206488	-1.538101071	0.371117444	-4.144513001	3.41E-05	0.009078791
GNG11	673.0364205	-1.323005467	0.321592789	-4.113915215	3.89E-05	0.009078791
ICA1L	281.0097204	-1.010286776	0.244316866	-4.135149537	3.55E-05	0.009078791
MIR100HG	569.1964169	-1.330161659	0.323016624	-4.117935613	3.82E-05	0.009078791
PIK3R3	1516.565374	0.8853273	0.213647633	4.143866636	3.41E-05	0.009078791
PSMA7	1585.308616	0.516904554	0.124434263	4.154037155	3.27E-05	0.009078791
PSMD2	2830.831803	0.510640841	0.123427458	4.137173777	3.52E-05	0.009078791
RAC3	90.72377107	1.428670565	0.34690057	4.118386323	3.82E-05	0.009078791
SREBF1	1895.665623	0.731869353	0.177934168	4.113146794	3.90E-05	0.009078791
VPS37B	624.6863147	0.828631626	0.201339159	4.115600905	3.86E-05	0.009078791
MOSPD1	232.3660991	-0.797535843	0.194414297	-4.102248944	4.09E-05	0.009370879
MMP15	610.6770732	1.146366628	0.279931089	4.095174397	4.22E-05	0.00951529
ALDH1A1	2670.569745	-1.178706724	0.290234179	-4.061226445	4.88E-05	0.010447227
CFL1	8307.677762	0.592369897	0.146005044	4.057187898	4.97E-05	0.010447227
EVPL	513.6483055	1.20983207	0.299877764	4.034417409	5.47E-05	0.010447227
GYG2	220.3726847	0.796326839	0.19718017	4.038574669	5.38E-05	0.010447227
HECTD2	232.713721	-0.693412759	0.17049219	-4.067123316	4.76E-05	0.010447227
IFI27	3329.224767	1.20148933	0.297661305	4.036431032	5.43E-05	0.010447227
PDGFD	362.985419	-0.889585504	0.220219486	-4.039540374	5.36E-05	0.010447227
RUNDC3B	82.35401625	-1.122816755	0.277271476	-4.049521327	5.13E-05	0.010447227
SLC9A3	30.67530664	-1.043575955	0.256629482	-4.066469471	4.77E-05	0.010447227
THBS1	9588.015124	-1.493986901	0.369035763	-4.048352633	5.16E-05	0.010447227
TP53BP2	658.7318227	0.369937328	0.091647547	4.036521878	5.42E-05	0.010447227
USF1	816.3526328	0.403769126	0.099992135	4.038008857	5.39E-05	0.010447227
PRNP	2302.789437	-1.401469414	0.347905064	-4.0283099	5.62E-05	0.01058659
GPRC5A	459.8261968	1.112753237	0.27673516	4.021004183	5.80E-05	0.010783878
SLC7A2	596.2016408	-1.028308079	0.25609336	-4.015364083	5.94E-05	0.010908697
EXOSC4	168.5808553	0.74266813	0.185319935	4.007491847	6.14E-05	0.011074747
NEAT1	7135.250596	-0.850001291	0.212179975	-4.006039174	6.17E-05	0.011074747
NAA16	288.6336615	-0.446305459	0.111816579	-3.991406845	6.57E-05	0.011640657
NR2F1-AS1	150.714888	-1.040856663	0.261520061	-3.980026083	6.89E-05	0.012068577
C10orf35	127.8772564	0.963574735	0.243467933	3.957706967	7.57E-05	0.012780937
DGKE	403.5230316	-0.97314477	0.246029901	-3.955392271	7.64E-05	0.012780937
FAM175A	216.3487987	-0.905130217	0.22873283	-3.957150434	7.58E-05	0.012780937
INA	55.53367329	1.951842026	0.493316193	3.956574007	7.60E-05	0.012780937
CBLC	179.1566834	1.52537489	0.385976484	3.951989182	7.75E-05	0.012820063
TMEM200A	728.6126242	-1.293032948	0.327524227	-3.94790016	7.88E-05	0.01289765
C16orf89	232.1589525	-1.448973952	0.367871411	-3.938805544	8.19E-05	0.013123359
GOLGA8N	59.94369453	-1.157904952	0.293994212	-3.938529755	8.20E-05	0.013123359
PRR36	283.3765577	1.377830655	0.350782651	3.927875717	8.57E-05	0.013572426
SLC37A1	589.2748082	0.968974749	0.247769443	3.910791971	9.20E-05	0.014415941
DBNDD1	432.7732018	1.450680158	0.371590172	3.903978812	9.46E-05	0.01467363
CLU	17786.07794	-1.144085223	0.293750564	-3.894750724	9.83E-05	0.014687597
FAXDC2	752.2704286	-1.250095256	0.321411743	-3.889388868	0.000100497	0.014687597
MARK2	980.4767201	0.444950659	0.114480613	3.886690047	0.00010162	0.014687597
MCOLN3	116.6972091	-1.173037344	0.301636232	-3.888913926	0.000100694	0.014687597
RBMS3	214.696716	-1.136107893	0.29184859	-3.892798983	9.91E-05	0.014687597
RNFT2	34.86468267	1.364006644	0.350346055	3.893312413	9.89E-05	0.014687597
ZNF710	448.3041296	0.695393936	0.178360494	3.898811442	9.67E-05	0.014687597
HOXD8	182.3316706	-1.480780142	0.381825853	-3.878155785	0.000105251	0.015066118
VAX2	38.90134013	1.553517205	0.401326851	3.870952572	0.000108411	0.015370599
MGAT4B	1005.00874	0.485418651	0.126558268	3.835534893	0.000125291	0.017431886
PAK6	183.0602778	0.683315732	0.17804705	3.837837974	0.000124122	0.017431886
CLDN4	3475.832367	1.321023544	0.345060388	3.828383645	0.000128988	0.017779983
CAPN13	1987.361025	1.789190208	0.468400347	3.819788387	0.000133566	0.018076366
TUBA1C	2089.723593	1.402959032	0.367139037	3.82132895	0.000132734	0.018076366
ADAMTSL5	116.2598143	-1.789279498	0.470165528	-3.805637363	0.000141439	0.018601432
DGKZ	982.9388418	0.394244146	0.10355823	3.806980341	0.000140674	0.018601432
ISG20	280.9939156	0.665476535	0.175046046	3.801722755	0.000143693	0.018601432
LIMK2	1138.304172	0.66187307	0.174095751	3.801776134	0.000143663	0.018601432
TIPARP	747.0961185	-1.090050483	0.286541868	-3.804157801	0.000142287	0.018601432
GPR22	67.51997844	-1.892584572	0.498124443	-3.799421205	0.000145034	0.018613167
CNP	1498.922742	0.450387382	0.119095466	3.781734086	0.00015574	0.019049656
DHCR24	1453.511246	1.126181946	0.29758022	3.784465067	0.00015404	0.019049656
GRIA3	52.46557375	-1.721005672	0.454552469	-3.786154047	0.000152997	0.019049656
MISP	494.0244945	1.523271289	0.402195841	3.787386979	0.00015224	0.019049656
MUC16	2956.442631	1.358336592	0.359002283	3.783643324	0.000154549	0.019049656
PTPRR	113.1237975	-1.648707526	0.436110209	-3.780483673	0.000156524	0.019049656
QSOX1	3373.600423	0.822514514	0.217647949	3.779105276	0.000157393	0.019049656
ZNF181	177.7430497	-0.661328404	0.175132942	-3.776150821	0.000159271	0.01912146
TUFT1	303.2249742	0.609125685	0.161781802	3.765106324	0.000166478	0.019669535
ZAK	3401.631668	-1.187071653	0.315273352	-3.765214051	0.000166406	0.019669535
ABCD2	70.48167449	-1.529204753	0.407020358	-3.757071906	0.000171913	0.019731704
ADGRV1	170.2891856	1.716869102	0.45800186	3.748607271	0.000177819	0.019731704
ATG4D	200.7105932	0.601958288	0.160469534	3.751230991	0.000175968	0.019731704
CA12	824.9443916	-0.915035605	0.244030706	-3.749674055	0.000177065	0.019731704
CHFR	415.7718712	0.655744555	0.174349839	3.761084946	0.000169178	0.019731704
GADD45B	2047.490327	-1.16300597	0.310657377	-3.743693397	0.000181335	0.019731704
PKDCC	1029.394292	-1.047108104	0.279978694	-3.73995639	0.000184052	0.019731704
PVRL4	378.8470222	1.379563582	0.36740197	3.754916123	0.0001734	0.019731704
SFN	468.4128469	1.382834264	0.369377481	3.743688594	0.000181338	0.019731704
SLC26A9	26.43715311	1.655490438	0.442545092	3.740840127	0.000183406	0.019731704
SORT1	1992.008015	0.707192347	0.18873654	3.746981618	0.000178975	0.019731704
TMEM8A	1242.894963	1.002721264	0.267798605	3.744310999	0.000180889	0.019731704
ZBTB7B	774.3964219	0.66954979	0.179038044	3.739706797	0.000184235	0.019731704
C1orf64	57.0215163	-1.667156677	0.447369129	-3.726579616	0.000194096	0.020219535
CHL1	99.41322201	-1.503385881	0.403094096	-3.729615237	0.000191772	0.020219535
NKIRAS2	699.558011	0.544397859	0.14615611	3.724769767	0.000195494	0.020219535
SBK1	584.3240012	1.542615602	0.414305429	3.723377718	0.000196575	0.020219535
SLC29A2	245.8422072	0.890919276	0.238956485	3.728374553	0.000192719	0.020219535
ZBTB20	1223.411807	-0.948299552	0.254719923	-3.722910806	0.000196939	0.020219535
PRSS8	2114.146852	1.336110039	0.35952302	3.716340724	0.000202129	0.020610232
ZNF781	33.81303478	-1.350917251	0.363897354	-3.71235799	0.000205337	0.020794939
NMRAL1	472.8505275	0.452803273	0.122095637	3.708595043	0.000208412	0.020963756
AVPR1A	592.0497116	-1.679843672	0.453709787	-3.702462937	0.000213517	0.021333027
C11orf80	115.2308396	0.607592835	0.164609903	3.691107422	0.00022328	0.022156565
FAM69A	191.4085606	-0.912394355	0.247744962	-3.682796809	0.000230689	0.022156565
ISG15	678.36438	1.137505997	0.308783711	3.683827726	0.000229758	0.022156565
KCTD5	428.5632454	0.605152468	0.164045245	3.688936343	0.000225194	0.022156565
KRT15	24.68683894	1.60540637	0.435750343	3.684234323	0.000229391	0.022156565
SLC2A4	94.46098651	-1.790757823	0.486124973	-3.683739621	0.000229837	0.022156565
TCF4	2382.447543	-0.622147333	0.169425562	-3.672098391	0.000240567	0.022957188
CLDN6	298.1292668	1.867369816	0.508831885	3.669915097	0.000242631	0.023006677
ASTN1	125.314192	-1.730410958	0.472401849	-3.663006321	0.000249272	0.023145313
CEP112	199.4456805	-0.871865859	0.237998845	-3.663319703	0.000248967	0.023145313
FGF18	128.4090545	1.62287108	0.443364485	3.66035426	0.000251867	0.023145313
MICU3	99.21231875	-1.16086046	0.317135881	-3.660451338	0.000251771	0.023145313
ST14	2644.853091	1.401508825	0.382620828	3.662918282	0.000249358	0.023145313
ARHGAP28	105.4810981	-1.270396306	0.347248212	-3.658467521	0.000253728	0.023173295
GPR137B	266.3769509	-0.69907827	0.191824638	-3.644361202	0.000268057	0.024144175
MEX3A	802.830434	1.280559177	0.351488748	3.643243726	0.000269224	0.024144175
MRPL14	489.6702824	0.605601809	0.166206817	3.643664086	0.000268784	0.024144175
MAPKAPK3	473.8385705	0.417322018	0.114623335	3.640812045	0.000271779	0.024227433
GRK6	575.8088832	0.335149955	0.092181943	3.635744091	0.000277179	0.024272763
MCF2L	661.7139896	0.737861425	0.202792697	3.63850097	0.00027423	0.024272763
SDCCAG3	392.2810928	0.411391785	0.113118781	3.636812406	0.000276033	0.024272763
ZMYM1	179.5080947	-0.663352663	0.182654453	-3.631735508	0.000281522	0.024508841
TGFBR3	1493.248475	-1.512652543	0.416994122	-3.627515266	0.000286162	0.024767974
OTUB2	241.1879521	0.914168165	0.252167718	3.625238678	0.000288695	0.024842763
AGAP11	94.27701638	-1.465733817	0.410551297	-3.570159995	0.000356763	0.024847072
ALDH1A2	2008.174505	-1.399378295	0.39130768	-3.57615852	0.00034868	0.024847072
ANAPC11	618.4980301	0.5947277	0.166336503	3.57544909	0.000349627	0.024847072
ARHGAP10	323.5781004	-0.760499324	0.212570093	-3.577640272	0.00034671	0.024847072
BAK1	381.5032861	0.734988268	0.204911306	3.586860483	0.000334683	0.024847072
BCL2L11	533.032941	0.617006368	0.171965116	3.587974012	0.000333257	0.024847072
BIK	68.24988525	1.537194502	0.428328324	3.588822909	0.000332174	0.024847072
CCNL1	946.3907139	-0.361002754	0.101137548	-3.569423643	0.000357767	0.024847072
CHCHD2	2474.706617	0.416545356	0.115881733	3.59457308	0.000324924	0.024847072
CHIC1	301.0654414	-0.5166297	0.144313801	-3.579905012	0.000343719	0.024847072
CLK4	396.7658559	-0.82258217	0.227714586	-3.612338512	0.000303448	0.024847072
COL4A6	646.1277155	-1.550037418	0.429277544	-3.610804801	0.000305248	0.024847072
CRABP1	46.73889928	1.872423446	0.517952726	3.615046994	0.000300293	0.024847072
CSRNP1	1831.042153	-1.021727915	0.286141087	-3.570713749	0.00035601	0.024847072
ECM2	464.1931773	-1.545408264	0.430070987	-3.593379489	0.000326417	0.024847072
EDA2R	134.0326063	-0.775863785	0.217332142	-3.569944951	0.000357056	0.024847072
ERV3-1	313.7664996	0.623466756	0.174685987	3.569071383	0.000358249	0.024847072
FRAS1	868.5646428	0.850834467	0.23560301	3.611305592	0.000304659	0.024847072
GATA5	28.33626597	-1.730001816	0.482292109	-3.587041513	0.000334451	0.024847072
GATAD2A	1259.612535	0.643903313	0.177762496	3.622267507	0.000292032	0.024847072
GRIN2D	105.8409669	1.684489895	0.469512661	3.587741151	0.000333555	0.024847072
HMGB3	957.0369162	1.283090888	0.35608289	3.603348891	0.000314143	0.024847072
JAZF1	554.600932	-1.278517837	0.356937356	-3.581910984	0.00034109	0.024847072
JUNB	7910.590004	-1.276577814	0.35481286	-3.597890492	0.000320809	0.024847072
LOC646214	127.767557	-0.710810333	0.196851479	-3.610896583	0.00030514	0.024847072
MT1F	114.2653391	1.094547985	0.305650189	3.58104796	0.000342219	0.024847072
PIGS	991.420143	0.468878466	0.1314335	3.567419771	0.000360514	0.024847072
PKMYT1	114.4706827	1.502946463	0.42027943	3.576064768	0.000348805	0.024847072
PKP3	503.2903505	1.288844271	0.356087369	3.619460798	0.000295218	0.024847072
PNRC1	1396.573555	-0.79867101	0.222709996	-3.58614801	0.000335599	0.024847072
RAB15	190.1442949	0.752583649	0.208230325	3.614188512	0.00030129	0.024847072
RPS6KB2	549.946185	0.416905268	0.1164454	3.580263966	0.000343247	0.024847072
S100P	66.95869623	1.420244967	0.397329462	3.574476854	0.000350929	0.024847072
SGIP1	213.874608	-1.289345374	0.361354636	-3.568088644	0.000359595	0.024847072
SH3BP4	1422.798836	0.741888496	0.206950432	3.584860818	0.000337258	0.024847072
ST8SIA2	29.75212669	1.654312927	0.460854756	3.589662262	0.000331107	0.024847072
TM7SF2	330.2200632	1.178925157	0.3289571	3.583826452	0.000338597	0.024847072
TMEM55A	158.6058273	-1.087405899	0.301453738	-3.607206555	0.000309511	0.024847072
TP53I3	431.6648154	0.938882598	0.263019672	3.569628803	0.000357487	0.024847072
TRAF3IP2-AS1	141.3280233	-0.94954202	0.264051588	-3.596047372	0.000323089	0.024847072
TUB	833.367663	-1.498048238	0.417624065	-3.587073551	0.00033441	0.024847072
VPS18	623.6719833	0.489559279	0.137075703	3.571451887	0.000355008	0.024847072
ZNF37BP	433.4449192	-0.649116012	0.179692216	-3.612376911	0.000303403	0.024847072
OLFML3	1848.184803	-1.233066173	0.345805548	-3.565779038	0.000362777	0.024887835
BSPRY	352.4923316	1.282209377	0.360277394	3.558950404	0.00037234	0.025426711
ZDHHC12	273.3658309	0.764631875	0.214971185	3.556904035	0.000375251	0.025508511
C16orf59	78.74979963	1.339867121	0.377343785	3.550786242	0.000384082	0.025567546
CLK1	1603.138973	-0.933621274	0.262797593	-3.552624909	0.000381408	0.025567546
KIFC1	292.5510459	1.324336911	0.373200424	3.548594339	0.000387293	0.025567546
PGR	9011.218302	-1.070536705	0.301159223	-3.554719972	0.000378382	0.025567546
SNHG18	133.81221	-0.865009208	0.243714201	-3.549276994	0.000386291	0.025567546
SNRNP25	293.6729456	0.512929959	0.144568026	3.548017997	0.000388142	0.025567546
UBALD2	408.3116105	0.576923452	0.16255436	3.54911092	0.000386534	0.025567546
ABCA8	713.1681794	-1.460167196	0.412262695	-3.541836831	0.000397351	0.02576643
ACTR1A	1723.039793	0.439493556	0.124031175	3.543412022	0.000394985	0.02576643
EFHD1	716.0883111	-0.93246211	0.263225268	-3.54244909	0.00039643	0.02576643
MAPK13	731.4120405	0.800297744	0.226003043	3.541092788	0.000398473	0.02576643
ULBP3	44.85643541	1.396918164	0.394586699	3.540205907	0.000399815	0.02576643
CXCL12	3472.213993	-1.597774861	0.451642085	-3.537701454	0.000403626	0.025826736
GOPC	876.0511656	-0.459109978	0.130037646	-3.530592804	0.00041463	0.025826736
LSR	1421.717915	1.047021323	0.296535803	3.530842868	0.000414238	0.025826736
PLA2G4C	180.702243	-1.053434655	0.298067147	-3.534219273	0.000408982	0.025826736
RNF4	1241.165323	0.337629475	0.095530953	3.534241667	0.000408947	0.025826736
SLC27A6	282.0894191	-1.149685932	0.325447941	-3.53262623	0.000411454	0.025826736
ZNF302	421.3236615	-0.606529547	0.1717409	-3.53165464	0.000412968	0.025826736
ZNF483	103.1922108	-1.297151094	0.366843516	-3.535979343	0.000406266	0.025826736
KNDC1	178.663409	-1.471554006	0.417070358	-3.528311182	0.00041822	0.02594185
MRPS11	300.5386238	0.529769015	0.150254099	3.525820712	0.000422173	0.026078359
LRRN4CL	381.1217285	-1.456337157	0.413414372	-3.522705684	0.000427165	0.026178073
PPP1R15A	2515.555326	-0.979431666	0.278040694	-3.522619843	0.000427304	0.026178073
CCDC50	1275.430395	-0.643574856	0.183202798	-3.512909541	0.000443228	0.026288209
CUX2	57.98415849	-1.411048683	0.401478509	-3.514630674	0.000440366	0.026288209
DPP3	978.9658241	1.139008198	0.323773164	3.517920338	0.000434943	0.026288209
INCENP	500.604581	0.686601807	0.195307911	3.515483849	0.000438953	0.026288209
PFKP	1625.359423	0.722677823	0.205525623	3.516241982	0.000437702	0.026288209
PRSS22	327.0278541	1.104454202	0.31431804	3.513811053	0.000441727	0.026288209
RRP1	476.4893623	0.346380568	0.098584757	3.513530663	0.000442193	0.026288209
SV2A	257.3153097	-0.779162087	0.221547769	-3.516903331	0.000436613	0.026288209
KLF2	777.0410451	-1.488389317	0.425070408	-3.501512426	0.000462625	0.027329779
KIF1A	581.5281509	1.696152976	0.484556562	3.500423087	0.00046452	0.027333254
TSR1	574.9260629	0.349345419	0.099874989	3.497826847	0.000469066	0.027492043
EPHB1	43.55906576	-1.479873659	0.423594482	-3.49360939	0.000476538	0.027820458
CSNK1G2	1045.006188	0.488883664	0.140320153	3.484058789	0.000493871	0.028207446
EPDR1	913.9059847	-1.108597247	0.3178001	-3.488347701	0.000486016	0.028207446
F10	172.4246959	-1.57264039	0.451375518	-3.484106529	0.000493783	0.028207446
MCM10	107.8095782	1.540040753	0.442070538	3.483699141	0.000494535	0.028207446
RBM24	611.0383627	-1.55478677	0.446059177	-3.485606505	0.000491023	0.028207446
SH2D3A	192.122277	0.911295667	0.261340308	3.487007698	0.000488457	0.028207446
SEMA4B	1730.306411	0.693205938	0.199135664	3.481073772	0.000499408	0.028268767
TPST1	356.190389	-0.76056532	0.218450036	-3.481644289	0.000498345	0.028268767
RGAG4	386.3028287	-1.117882285	0.321275223	-3.479516017	0.00050232	0.02832592
SNRK	401.4568357	-0.803671418	0.23136695	-3.473579169	0.000513566	0.02874231
TMSB10	10403.31152	0.952702115	0.274246928	3.47388436	0.000512982	0.02874231
C1QTNF6	746.5836035	1.110361547	0.320126661	3.468506946	0.000523359	0.029180694
CD69	171.1008371	-1.012147833	0.291925144	-3.467148523	0.000526011	0.029203766
RALY	2107.298192	0.393536598	0.113532548	3.466288773	0.000527696	0.029203766
CAPN1	3501.892552	0.616743326	0.178240677	3.46017159	0.000539831	0.029210638
DSP	4009.183399	1.300097438	0.3752396	3.464712781	0.000530798	0.029210638
EFNA3	79.65323364	1.111127022	0.321316741	3.458042739	0.000544115	0.029210638
GPRASP1	950.7265451	-1.368023894	0.395075602	-3.462688879	0.000534806	0.029210638
LPAR6	446.1922091	-0.6894436	0.199345588	-3.458534528	0.000543123	0.029210638
MSANTD2	156.3174193	-0.675816062	0.195471265	-3.457367818	0.00054548	0.029210638
PCMTD1	1210.419213	-0.429613161	0.12410015	-3.461826274	0.000536523	0.029210638
PGD	2096.556734	1.050172774	0.303435885	3.460937961	0.000538297	0.029210638
RIMS2	134.3906156	1.478690121	0.427364114	3.460024066	0.000540127	0.029210638
ITM2A	431.0085041	-1.285800171	0.372212791	-3.45447605	0.000551363	0.02926673
LMNB1	798.5431181	1.269408151	0.367456915	3.45457685	0.000551157	0.02926673
TMPRSS4	1049.559644	1.365076552	0.395221037	3.453957213	0.000552425	0.02926673
C11orf84	437.8664426	0.507020055	0.146911079	3.451203682	0.000558092	0.029462123
FRG1B	177.1776646	-0.670093021	0.194297929	-3.448791378	0.000563102	0.029517229
MSRB1	306.4775361	0.630379152	0.182780789	3.448826085	0.000563029	0.029517229
GRB7	404.3236454	1.107129512	0.321356595	3.445174398	0.000570691	0.029620977
MMRN1	596.7438542	-1.283104944	0.37251957	-3.444396077	0.000572337	0.029620977
PCDHB2	241.8556752	1.22478718	0.355478055	3.445464952	0.000570078	0.029620977
RDH13	218.8945794	0.581488511	0.168837884	3.444064184	0.00057304	0.029620977
KIF2C	225.5522248	1.304802579	0.37922619	3.440697434	0.000580217	0.0298882
MBNL2	898.396213	-0.80691925	0.234651801	-3.438794196	0.000584311	0.029995316
ACO2	1207.940004	0.322206753	0.09379336	3.435283201	0.000591935	0.030075545
C1orf21	863.7500959	-1.082865431	0.315186933	-3.435629205	0.000591179	0.030075545
NR4A1	9371.875193	-1.451096621	0.422210871	-3.436900187	0.000588412	0.030075545
ADAMTSL4	646.5683198	-1.27189575	0.370482936	-3.433075122	0.000596777	0.030076662
ANGPT1	79.029482	-1.2461111	0.363321383	-3.429776388	0.000604079	0.030076662
FKBP7	331.611697	-0.959817615	0.279564623	-3.433258489	0.000596373	0.030076662
MTHFD2	664.7145736	0.954362566	0.27813637	3.431275698	0.00060075	0.030076662
RAB8B	450.0130837	-0.759236833	0.221348239	-3.430055899	0.000603457	0.030076662
SORCS1	87.16314979	-1.358029894	0.395708702	-3.431892924	0.000599384	0.030076662
MYBL2	377.5853596	1.466464642	0.427891631	3.427187014	0.000609869	0.030163184
NMT2	342.0316304	-0.715152276	0.208629261	-3.427861818	0.000608355	0.030163184
CELF6	126.4621571	-1.093813676	0.319374824	-3.424858802	0.000615119	0.030192558
FAM89A	59.17910842	-0.985974771	0.287982315	-3.423733742	0.000617671	0.030192558
LGMN	1490.935	0.70859388	0.207076871	3.421888101	0.000621879	0.030192558
NACC1	1288.324297	1.014424962	0.296274176	3.423939864	0.000617203	0.030192558
NRIP3	75.81722197	-1.208113481	0.353088573	-3.421559273	0.000622632	0.030192558
ZNF404	26.0201503	-1.20081761	0.350831647	-3.422774489	0.000619855	0.030192558
POR	1486.859717	0.435226081	0.127255458	3.420097567	0.000625987	0.030256706
SMAD5	1332.615602	-0.540342393	0.158049537	-3.418816677	0.000628941	0.030301108
TFRC	3149.980186	0.928405406	0.271862727	3.414978643	0.00063787	0.03063217
COX5B	531.1723345	0.398410059	0.117103995	3.402190168	0.000668481	0.030681451
DTYMK	271.7806039	0.717147479	0.210418091	3.408202575	0.000653923	0.030681451
GADD45A	882.5397713	-0.554636886	0.162528633	-3.412548769	0.000643584	0.030681451
HGF	149.8671738	-1.264017406	0.371050168	-3.406594347	0.000657788	0.030681451
HN1	790.8268357	1.247220527	0.366150704	3.406303777	0.000658489	0.030681451
LINC00152	58.47376615	0.939217758	0.275777897	3.405703532	0.000659938	0.030681451
LOC101927318	116.9509646	1.483321289	0.434985166	3.410050289	0.000649509	0.030681451
MAP3K12	495.311185	-0.689960376	0.202332511	-3.410032187	0.000649552	0.030681451
MFSD12	504.0429404	0.867516572	0.254784242	3.404906699	0.000661867	0.030681451
NLRP2	602.4173216	1.372969992	0.403343017	3.403976108	0.000664126	0.030681451
NRCAM	626.3885172	1.208820439	0.355214637	3.403070465	0.000666331	0.030681451
PCDH18	1103.432202	-1.047880251	0.308126909	-3.400807335	0.000671872	0.030681451
PRICKLE2	481.119852	-1.152248765	0.337737386	-3.411670765	0.00064566	0.030681451
SMPDL3B	351.0636089	1.365092681	0.401387186	3.400937367	0.000671552	0.030681451
WNT2	640.6969896	-1.053093725	0.309388322	-3.403792737	0.000664572	0.030681451
XPO6	1300.701671	0.266801094	0.078184462	3.412456729	0.000643801	0.030681451
ANO4	205.9156225	-1.445368737	0.426202979	-3.391268502	0.000695699	0.030928585
AURKAIP1	594.4582312	0.432651782	0.127406937	3.395825953	0.000684219	0.030928585
BUB1B	242.5463777	1.439638461	0.424816351	3.388848986	0.000701867	0.030928585
DAZAP1	1091.140266	0.585842415	0.172839152	3.389523782	0.000700141	0.030928585
DPYD	400.0887227	-1.093795803	0.322434514	-3.392303726	0.000693076	0.030928585
FAM129B	3325.339757	0.645050349	0.190352594	3.388713207	0.000702214	0.030928585
HOXA13	47.6130242	-1.653918828	0.487845308	-3.390252605	0.000698282	0.030928585
IGFBP6	367.3686133	-1.507095985	0.444699005	-3.389024867	0.000701416	0.030928585
NUTF2	788.567086	0.562727294	0.16580301	3.393951012	0.00068892	0.030928585
PLEKHG6	83.37868828	1.205433722	0.355179747	3.393869537	0.000689125	0.030928585
SLC2A13	222.1865686	-1.04150403	0.306854131	-3.394133967	0.00068846	0.030928585
SMARCA4	3051.022445	0.944954629	0.278476716	3.393298523	0.000690563	0.030928585
NBEAL2	1385.726246	0.820217738	0.242128843	3.38752594	0.00070526	0.030971129
ADRM1	1244.811063	0.45125113	0.133554744	3.378772744	0.000728102	0.031786656
IL17D	62.03358758	-0.801301899	0.237141423	-3.379004351	0.000727489	0.031786656
AP2S1	745.0866408	0.744491711	0.220468626	3.376860119	0.000733183	0.03191491
S100PBP	398.061215	-0.56057463	0.166099794	-3.374926702	0.000738354	0.032046266
UPP1	135.2552947	0.570550454	0.169162724	3.372790645	0.000744105	0.032202012
CCDC120	303.5114026	0.447809715	0.132825478	3.371414285	0.000747833	0.032269538
ARVCF	525.5530544	0.86604676	0.257135384	3.368057504	0.000756998	0.032455297
CREBRF	599.8332168	-0.979445357	0.290857017	-3.3674462	0.000758678	0.032455297
RGN	83.96821217	-1.397233567	0.414743417	-3.368910779	0.000754659	0.032455297
FBN3	99.03140915	1.4843403	0.441183376	3.364452016	0.000766958	0.032715492
AKT3	819.0245114	-1.279176788	0.380465372	-3.362137215	0.000773417	0.032761642
ARHGEF19	490.5117531	0.853552179	0.253789487	3.363229067	0.000770364	0.032761642
KDM5B	1885.288771	0.599248883	0.178257688	3.361700067	0.000774642	0.032761642
E2F3	338.9758095	0.966788968	0.288242201	3.354085435	0.000796278	0.033226694
FASN	2144.990303	0.807298538	0.240818164	3.352315813	0.000801385	0.033226694
IL17RE	102.7113831	0.981167483	0.292717644	3.351924642	0.000802519	0.033226694
KIAA1586	130.5462748	-0.620218911	0.185052228	-3.351588458	0.000803494	0.033226694
LOC202181	85.77803523	-1.244989192	0.371208862	-3.35387788	0.000796875	0.033226694
NXPH4	38.07245727	1.60224391	0.477289209	3.356966556	0.000788026	0.033226694
PCDHA4	94.87946859	1.621767033	0.483497234	3.354242627	0.000795825	0.033226694
VCP	5391.931855	0.498776933	0.148670652	3.354911867	0.000793903	0.033226694
C5	97.08141972	-0.721331721	0.215592202	-3.34581545	0.00082041	0.033264787
CYBRD1	3062.878238	-1.301173388	0.388839675	-3.346297896	0.000818984	0.033264787
DPY19L4	641.3782266	-0.415045967	0.123948163	-3.348544714	0.000812372	0.033264787
MAP6	263.7246018	-1.080011751	0.322856057	-3.345180388	0.000822291	0.033264787
MYH14	1993.195477	1.305278462	0.389939246	3.347389301	0.000815766	0.033264787
TCEAL7	228.9418501	-1.363883819	0.407475085	-3.347158804	0.000816444	0.033264787
TRAF7	1491.690858	0.712003427	0.212578369	3.349369132	0.000809958	0.033264787
TSPO	928.2220656	0.625304408	0.186808554	3.347300734	0.000816026	0.033264787
PM20D2	484.7045295	-0.641858932	0.191967455	-3.343582033	0.000827042	0.033366341
ADRA2A	392.5514837	-1.071912772	0.320833173	-3.341028486	0.000834687	0.033566566
IGSF3	731.3925316	0.956270307	0.28630448	3.340046607	0.000837643	0.033566566
MYO10	1662.339171	1.045398537	0.313024179	3.339673438	0.00083877	0.033566566
SMIM10L2B	67.85476963	-1.333699783	0.399714473	-3.336631203	0.000848004	0.033845132
GUCY1A2	1279.253084	-1.370126593	0.410821654	-3.335088543	0.000852722	0.033942457
PLAGL1	512.6468202	-0.766633424	0.23020136	-3.33027322	0.000867608	0.034351279
SORL1	2447.324136	0.916551259	0.275202394	3.330462523	0.000867018	0.034351279
PLK1	206.3747853	1.37721692	0.41391187	3.327319219	0.000876859	0.034625449
SOCS3	4593.983198	-1.133051022	0.340843809	-3.324252903	0.000886558	0.034915828
TGM2	10551.15921	-1.132227712	0.34067719	-3.323462045	0.000889075	0.034922592
SSPN	753.5443977	-1.239247547	0.373334867	-3.319399438	0.000902113	0.03534146
H2AFX	390.4520617	0.837933784	0.252506295	3.318466911	0.00090513	0.035366607
HAPLN3	700.2609209	1.156508673	0.348976069	3.314005676	0.000919696	0.035841676
TMC5	765.5136097	1.310153596	0.395443047	3.313128415	0.000922586	0.035860416
ATP1B2	274.7780673	-1.406783118	0.425566216	-3.305673867	0.000947483	0.036343024
LAYN	242.5293135	-1.228275506	0.37128491	-3.308175129	0.000939061	0.036343024
MYO1D	1028.056396	0.506716924	0.15323822	3.306726764	0.000943929	0.036343024
PAFAH1B3	207.4174934	0.999710784	0.302481267	3.30503371	0.00094965	0.036343024
PRR11	211.0753058	1.128379722	0.341370473	3.305440306	0.000948273	0.036343024
RRM2	386.6808516	1.328771035	0.401886482	3.306334236	0.000945253	0.036343024
AGPAT2	785.1276173	0.706399755	0.213985345	3.301159508	0.000962861	0.036381004
ATP6V0B	886.3533752	0.530763674	0.160748465	3.301827318	0.000960572	0.036381004
DCN	11554.58937	-1.23454842	0.373661486	-3.303922039	0.000953423	0.036381004
KRCC1	468.6946884	-0.378935461	0.114784354	-3.30128147	0.000962443	0.036381004
WHAMMP3	59.88374292	-1.033741176	0.313083557	-3.30180603	0.000960645	0.036381004
NUDT18	110.4599421	0.680384768	0.206156226	3.300335772	0.000965692	0.036395592
PPP4C	954.4259369	0.582939925	0.176735373	3.298377198	0.000972454	0.036557888
BAIAP2L1	396.6127781	0.823388771	0.249708511	3.297399707	0.000975845	0.036578008
CLIC2	307.4593801	-1.065776642	0.323344452	-3.296103075	0.00098036	0.036578008
GSTM5	274.2597591	-1.61122792	0.488745963	-3.296657245	0.000978428	0.036578008
ABCC1	1681.233821	0.831798595	0.252520506	3.293984354	0.00098778	0.036762701
CNTN4	282.8054752	-1.32886427	0.403949198	-3.289681667	0.001003008	0.037143726
STRIP2	25.75230372	0.923116671	0.280598302	3.289815596	0.001002531	0.037143726
CACNA2D1	203.7025736	-1.318855723	0.401040266	-3.288586798	0.001006917	0.037195975
PUF60	2087.384552	0.626268369	0.190487737	3.287709647	0.00101006	0.037219694
CHMP1A	1540.512287	0.356104918	0.108392534	3.285326991	0.001018641	0.037350999
GYS1	904.8502799	0.512192008	0.155878963	3.285831515	0.001016818	0.037350999
C20orf196	90.76449334	0.63386488	0.193181711	3.281184727	0.00103372	0.037718118
UBE2C	207.5037881	1.378710174	0.420166599	3.281341677	0.001033145	0.037718118
MRPS34	472.5353395	0.395610091	0.120691446	3.277863542	0.001045959	0.038071354
PACSIN1	151.9891909	0.890248752	0.27165132	3.2771744	0.001048516	0.038071354
TRPC4AP	1409.249402	0.342857629	0.104691449	3.274934433	0.001056865	0.038281142
ADM	681.3198662	1.052504631	0.321577215	3.272945294	0.001064331	0.038286906
NDUFS3	505.563905	0.411826514	0.125831671	3.272836721	0.00106474	0.038286906
S100A14	152.0371742	1.18935486	0.363293402	3.273813549	0.001061066	0.038286906
ARMCX4	402.4313743	-1.03684529	0.317336835	-3.267333553	0.001085657	0.038573207
HAND2-AS1	227.7744879	-1.506496364	0.460962112	-3.268156588	0.001082505	0.038573207
HK2	1322.049432	1.311537395	0.401130998	3.269598712	0.001077002	0.038573207
SLC25A10	380.6311598	1.019940525	0.312105636	3.267933699	0.001083357	0.038573207
VARS	1311.90431	0.598925877	0.183224951	3.268800864	0.001080043	0.038573207
CEP85L	208.1768648	-0.791428861	0.24248374	-3.263843009	0.00109912	0.038591054
IRAK1	1333.622852	0.643312872	0.197066975	3.264437739	0.001096816	0.038591054
MKNK2	2122.448269	0.481918386	0.147624086	3.264497008	0.001096586	0.038591054
UROS	325.99093	0.496043985	0.151952249	3.264472814	0.00109668	0.038591054
ZMIZ2	2091.762432	0.551709357	0.169014061	3.264280816	0.001097423	0.038591054
MYD88	775.9337083	0.613574952	0.18804114	3.262982523	0.001102463	0.03861734
KLHDC1	77.27787149	-1.199441218	0.367859841	-3.260592993	0.001111795	0.038671245
TCF3	1750.24783	0.639414897	0.196041372	3.261632441	0.001107727	0.038671245
TLL1	59.90479615	-1.350175811	0.414083407	-3.260637323	0.001111621	0.038671245
HIPK3	2131.672462	-0.690836217	0.212024787	-3.258280439	0.001120896	0.038896912
CEP85	234.2372414	0.782348451	0.2401795	3.257348985	0.001124581	0.038934033
HJURP	127.8645588	1.371362725	0.421141149	3.2563019	0.001128737	0.038987245
CDC42BPG	369.6420983	1.158821871	0.356458851	3.250927472	0.001150292	0.039556737
COL24A1	65.79703866	-1.096750942	0.337371876	-3.250866538	0.001150539	0.039556737
ABCA6	127.7645556	-1.335278928	0.411410284	-3.245613875	0.001171977	0.039824819
EFNA4	156.6948862	0.861086751	0.265234004	3.246517183	0.001168264	0.039824819
GPN1	526.311824	0.349737444	0.10773066	3.246405856	0.001168721	0.039824819
PPP1CA	1492.224067	0.68650797	0.211486761	3.246103765	0.001169962	0.039824819
TRPC1	230.0191385	-1.397533398	0.430245204	-3.248225398	0.001161272	0.039824819
TSPAN17	559.7434804	0.711048698	0.219163131	3.244380996	0.001177062	0.039824819
ZC2HC1A	324.4138219	-0.613880102	0.18917824	-3.244982628	0.001174578	0.039824819
ABCA9	407.2850807	-1.363880072	0.420754972	-3.241506729	0.001188996	0.040137387
CXCL1	328.8214896	1.278889083	0.395070076	3.237119594	0.001207428	0.040667377
LOC728392	411.9932585	-1.044418079	0.322730982	-3.23618784	0.001211376	0.040708263
A2M-AS1	66.58461349	-1.358178282	0.421381303	-3.223157438	0.001267858	0.040787186
ABRACL	563.2499448	1.115771715	0.346454527	3.220543037	0.00127948	0.040787186
ACSF2	393.1488365	0.457945011	0.142087244	3.222984689	0.001268623	0.040787186
AIFM2	302.0925469	0.559301897	0.173302427	3.227317168	0.001249569	0.040787186
ANTXR2	2170.801349	-1.157866189	0.359098131	-3.22437264	0.00126249	0.040787186
CDH3	1529.235123	1.044064664	0.323775974	3.224651453	0.001261261	0.040787186
FAM174B	648.3817545	0.99948932	0.309386741	3.230549948	0.001235523	0.040787186
HMGA2	101.2297694	1.486352681	0.459966207	3.231438876	0.001231687	0.040787186
HNRNPU-AS1	250.6232909	-0.663669518	0.205225854	-3.233849472	0.001221338	0.040787186
KCTD12	3024.984537	-1.185454115	0.367550757	-3.225280024	0.001258495	0.040787186
KLF10	1735.294886	-0.678919197	0.210241666	-3.22923239	0.00124123	0.040787186
LOC100505915	114.1370277	-0.601673342	0.186685409	-3.222926443	0.001268881	0.040787186
MRPL37	708.0514619	0.418101518	0.129640972	3.225072383	0.001259408	0.040787186
MRPS12	274.8991091	0.758992228	0.23499013	3.229889816	0.001238379	0.040787186
PBX3	141.4615144	-1.078905945	0.334909134	-3.221488565	0.001275266	0.040787186
PDCL3	415.1760915	0.655738054	0.203520365	3.221977588	0.001273091	0.040787186
SEMA5A	1281.001955	-0.941153753	0.292000706	-3.223121499	0.001268018	0.040787186
SEPP1	1400.970972	-0.924560736	0.286134062	-3.231215217	0.001232651	0.040787186
SLC9A9	131.731762	-0.994220312	0.308096067	-3.226981505	0.001251035	0.040787186
TMEM102	118.3843934	1.066761737	0.331215445	3.220748775	0.001278562	0.040787186
TRAF4	1035.523897	1.072004018	0.332577795	3.223318078	0.001267148	0.040787186
TTYH2	185.3742085	-1.26620406	0.392812312	-3.223432724	0.00126664	0.040787186
WSB2	783.1355626	0.586753206	0.182082969	3.222449691	0.001270995	0.040787186
ZDHHC15	67.81602123	-1.411840438	0.436735479	-3.232712946	0.001226207	0.040787186
UQCR11	860.2898235	0.476949282	0.14819543	3.2183805	0.001289167	0.041008174
SLC7A3	106.7222513	-1.541716268	0.479273217	-3.216779516	0.001296382	0.041149758
ISOC1	1166.538849	-0.65090773	0.202541725	-3.213696979	0.001310379	0.041242304
POLK	427.3400198	-0.422433779	0.131425063	-3.214255858	0.001307831	0.041242304
SLC22A17	438.6616196	-1.083044632	0.336974049	-3.214029788	0.001308861	0.041242304
TLE3	861.2681067	0.385761595	0.1200237	3.214045182	0.001308791	0.041242304
FOXL2NB	425.5116898	-1.240264578	0.38649041	-3.209043606	0.001331773	0.041305885
PGM2L1	783.9219365	0.758682422	0.236317334	3.210439155	0.001325323	0.041305885
PRRT2	415.5641724	-1.355434386	0.422405443	-3.208846876	0.001332684	0.041305885
RBM20	154.0787407	-1.36401732	0.42513482	-3.208434727	0.001334596	0.041305885
TIMELESS	704.9409113	0.962013695	0.299809093	3.208754228	0.001333114	0.041305885
TP53I11	915.5535777	0.617529199	0.192313574	3.211053632	0.001322493	0.041305885
TRPT1	282.8043828	0.395244893	0.123187187	3.208490289	0.001334338	0.041305885
TXNDC15	863.0022659	-0.501955059	0.156327741	-3.210914808	0.001323132	0.041305885
BTG2	9363.542489	-1.137274005	0.35475188	-3.205829395	0.001346738	0.041350199
COLQ	80.81521279	-0.689137901	0.214862609	-3.207342144	0.001339676	0.041350199
CYP7B1	38.74374077	-1.139046962	0.355314396	-3.205743909	0.001347138	0.041350199
PCDHB15	132.4987851	-1.362315937	0.424946929	-3.205849591	0.001346644	0.041350199
FAM228B	69.44899909	-0.750825127	0.234434574	-3.202706467	0.001361427	0.041362366
GAPDH	28359.77917	0.970534982	0.302866133	3.204501513	0.001352966	0.041362366
HSD17B6	119.0796882	-1.515125253	0.472994765	-3.203260089	0.001358812	0.041362366
MSC-AS1	56.54229516	-1.333301326	0.416202068	-3.203495194	0.001357703	0.041362366
NFATC4	1357.993581	-0.746110948	0.232841668	-3.204370401	0.001353582	0.041362366
SERPINF1	3036.387597	-1.236278492	0.386208282	-3.201066755	0.001369198	0.041513751
APEH	1391.174395	0.605531426	0.189222276	3.200106445	0.001373768	0.041522515
SFRP5	34.99126374	-1.603609292	0.501153832	-3.199834441	0.001375065	0.041522515
SNCA	202.874604	-1.33882646	0.41867432	-3.197775447	0.001384921	0.041735456
NDUFS2	1355.625066	0.365778098	0.114542239	3.19339051	0.001406127	0.04220364
YKT6	1147.438251	0.537900778	0.168433692	3.193546196	0.001405368	0.04220364
ECE2	106.3103916	1.217140635	0.38126818	3.192347795	0.001411213	0.042271082
PFKL	3347.900961	0.445429748	0.139636191	3.189930516	0.00142307	0.04254065
FAM83D	111.4589733	1.295329388	0.406336182	3.18782684	0.001433464	0.042706607
TIMM8B	394.7829632	0.751301699	0.235691681	3.187646238	0.001434359	0.042706607
HOXD10	455.2759703	-1.190952528	0.373859152	-3.185564728	0.001444718	0.042830626
LOC286437	91.7884007	-0.868220994	0.272499918	-3.186133048	0.001441883	0.042830626
TSTA3	749.358842	0.8141225	0.25560529	3.185076883	0.001447156	0.042830626
CIB1	1380.087927	0.53968044	0.169691247	3.180366981	0.001470887	0.043274876
TMEM189	262.8348736	0.551487619	0.173370694	3.1809737	0.00146781	0.043274876
ZDBF2	216.4893971	-1.24120368	0.390247095	-3.180558411	0.001469915	0.043274876
LRRK2	310.6474338	-1.143567102	0.359849245	-3.177906075	0.001483428	0.043429619
SYNDIG1	47.4913535	-1.315401018	0.41394719	-3.177702492	0.00148447	0.043429619
THOC3	162.2752274	0.601465262	0.18928175	3.177618885	0.001484898	0.043429619
SLC16A3	1055.62713	1.063549204	0.334899392	3.175727488	0.001494613	0.043628041
NR3C1	674.4697924	-1.161093557	0.365869531	-3.173518043	0.001506035	0.043789744
SIRT7	249.6425059	0.475727083	0.149888949	3.173863632	0.001504243	0.043789744
CLUH	1244.250306	0.586977066	0.18524549	3.168644295	0.001531517	0.044193344
ITPR3	1626.096337	0.901924444	0.284545513	3.169701871	0.001525954	0.044193344
JUN	8783.461043	-1.219666192	0.384992048	-3.168029565	0.001534759	0.044193344
RABL6	1582.019226	0.382949669	0.120840263	3.169056892	0.001529345	0.044193344
WFIKKN2	59.75147467	-1.551924211	0.489797292	-3.168503043	0.001532261	0.044193344
PDZRN3	1328.252661	-1.06096722	0.334990723	-3.16715404	0.001539388	0.044241047
POU6F1	272.4128206	-1.004261417	0.317195463	-3.166064888	0.001545163	0.044321474
SLC24A3	870.1628493	-1.363693824	0.431045661	-3.163687628	0.001557839	0.044599133
ADM2	44.92867277	1.254598936	0.397056034	3.159752852	0.00157903	0.045049142
MTX1	446.5880281	0.453893977	0.143653432	3.159645906	0.00157961	0.045049142
LAMTOR2	473.2869642	0.715857906	0.22663357	3.158657856	0.001584974	0.045115707
CSDC2	584.9036638	-1.417848946	0.449328201	-3.15548622	0.001602308	0.045327864
ELF3	3580.692732	1.059581044	0.335685646	3.156468129	0.001596923	0.045327864
RAB40C	464.831476	0.595718354	0.188812687	3.155075877	0.001604564	0.045327864
9-Sep	5820.055722	0.511528805	0.162129249	3.155068005	0.001604607	0.045327864
AURKB	138.9962646	1.34841918	0.427944735	3.150918961	0.001627576	0.045628772
BIRC5	248.9382246	1.312626389	0.416731125	3.149816057	0.001633733	0.045628772
CRIP2	1980.31193	0.655765409	0.208159468	3.150303059	0.001631012	0.045628772
FAM64A	74.20499213	1.306946538	0.414938942	3.149732179	0.001634202	0.045628772
GPI	4008.921803	0.794694693	0.252296158	3.149848565	0.001633551	0.045628772
PLEKHJ1	536.4403047	0.67209483	0.213449048	3.148736604	0.001639779	0.045628772
PROS1	563.0239218	-0.887276831	0.281525136	-3.151678905	0.001623347	0.045628772
ZFX	872.4759469	-0.639262496	0.203003832	-3.14901689	0.001638207	0.045628772
CIAPIN1	583.1679313	0.684666321	0.217679024	3.145302232	0.001659153	0.045813476
EBF1	266.5012708	-1.335023394	0.424575442	-3.14437262	0.001664434	0.045813476
IRS1	2052.657144	-0.870508388	0.276700091	-3.14603578	0.001654998	0.045813476
NAALAD2	125.9659881	-1.435830475	0.456765447	-3.143474366	0.00166955	0.045813476
PAK1	1287.966027	0.546656394	0.173934848	3.142880223	0.001672943	0.045813476
PPP1R13L	284.7504865	0.626578614	0.199377451	3.142675413	0.001674114	0.045813476
RPS6KA6	74.02981046	-1.500389786	0.476825254	-3.146624	0.001651672	0.045813476
SNX11	294.4361681	0.469431002	0.149263653	3.144978648	0.00166099	0.045813476
TALDO1	1979.476194	0.730620825	0.232404707	3.143743661	0.001668015	0.045813476
NHSL1	286.9584067	1.065969793	0.339251702	3.142120694	0.001677289	0.045816144
ACLY	3282.133738	0.628128431	0.199966646	3.141166012	0.001682766	0.045881575
OPRK1	42.50065831	1.525752063	0.486075917	3.138917211	0.001695733	0.046150612
FBXO17	320.224589	-1.333668967	0.425101797	-3.137293177	0.001705155	0.046237972
HMGA1	1614.949589	1.228350089	0.391522037	3.137371519	0.0017047	0.046237972
SAP30L	762.7836636	-0.701334309	0.223614866	-3.136349213	0.001710654	0.046302732
SNED1	1065.719785	-1.282257581	0.409026625	-3.134900035	0.001719127	0.046385113
ZRANB2	1245.871762	-0.535943733	0.170967854	-3.134763185	0.001719929	0.046385113
FREM2	426.3965005	1.059297597	0.337993641	3.134075526	0.001723965	0.04640988
PRC1	308.9081527	1.062073911	0.33896634	3.133272493	0.001728689	0.046453049
FAM32A	1024.326043	0.460249635	0.146932203	3.132394572	0.001733867	0.046508245
SLC25A22	384.3046199	0.713760546	0.227933289	3.131444941	0.001739484	0.046574997
CYP11A1	34.76956849	-1.510836255	0.482584055	-3.130721452	0.001743775	0.04657632
EMC8	252.5353609	0.38151924	0.121881968	3.130235307	0.001746663	0.04657632
GRHL1	153.225645	1.256858205	0.401570601	3.129856122	0.001748919	0.04657632
DNAJC27-AS1	32.97380218	-1.115410894	0.356452816	-3.129196471	0.001752851	0.046597656
HID1	1674.512238	0.748480184	0.239240645	3.128566149	0.001756615	0.046614479
TMEM110	351.7094864	-0.664841388	0.212722625	-3.125391042	0.001775688	0.047036785
MTA2	1633.661442	0.506837096	0.16223912	3.12401285	0.001784027	0.047141493
MYADM	3516.918696	-0.750875402	0.240380761	-3.123691755	0.001785974	0.047141493
PGK1	6268.030348	0.796739506	0.255180805	3.122254852	0.001794715	0.047288359
COQ9	639.0531147	0.516972048	0.165637633	3.121102607	0.001801752	0.047389909
ETV4	211.811918	1.35640936	0.434860646	3.119181678	0.001813541	0.047509797
GADD45G	329.2272708	-1.160453554	0.37208549	-3.118782067	0.001816002	0.047509797
SLC16A7	155.2945498	-1.190434275	0.381759449	-3.118283719	0.001819076	0.047509797
TFAP2A	385.6806194	1.445481673	0.463403543	3.119271949	0.001812985	0.047509797
ABCA12	41.94517387	1.415687549	0.455861483	3.105521309	0.001899439	0.047565587
ADCY3	717.3315574	-0.866250707	0.279003802	-3.104798931	0.001904084	0.047565587
AMOTL2	1572.168355	-0.672752812	0.216293889	-3.110364393	0.001868567	0.047565587
BHLHB9	171.1525353	-0.726666494	0.233860164	-3.107269244	0.001888243	0.047565587
CASC4	1953.480589	-0.333925037	0.107542423	-3.105054053	0.001902443	0.047565587
CBX7	1616.892966	-1.319807154	0.423734822	-3.114700716	0.001841316	0.047565587
CDCA5	276.9657596	1.309472841	0.421614774	3.105851414	0.00189732	0.047565587
DCTPP1	521.1472933	0.781803409	0.25124555	3.111710467	0.001860068	0.047565587
DEPDC1B	86.40715024	1.416444754	0.454443617	3.116876772	0.00182778	0.047565587
EHBP1	834.9406409	-0.857267254	0.275807402	-3.10820974	0.001882244	0.047565587
FAM110A	169.4179326	0.959269945	0.308935465	3.105081979	0.001902263	0.047565587
GIPC1	1520.181159	0.820167914	0.263675243	3.110523019	0.001867563	0.047565587
GNG7	232.2479158	-1.327296183	0.42733243	-3.106003873	0.001896342	0.047565587
LRCH2	113.3468324	-1.321087904	0.425278221	-3.106408553	0.001893749	0.047565587
MTOR	1516.076117	0.597975157	0.192119461	3.112517356	0.001854991	0.047565587
RNF139	471.0704881	-0.495109068	0.159467345	-3.104767736	0.001904285	0.047565587
SCARA3	2044.295899	-0.950106371	0.305220806	-3.112849297	0.001852906	0.047565587
SPINT1	2619.106802	1.07271241	0.345131589	3.108125838	0.001882779	0.047565587
TACC3	449.6816868	1.152578317	0.370179052	3.113569796	0.001848388	0.047565587
TMEM205	1304.254115	0.655054329	0.210648259	3.109706824	0.001872731	0.047565587
TOMM40	720.733456	0.738509667	0.237798217	3.105614819	0.001898839	0.047565587
TPRN	194.3837869	0.659432712	0.211896867	3.112045598	0.001857958	0.047565587
TPX2	414.7951167	1.275659217	0.41063228	3.106573152	0.001892695	0.047565587
UCP2	2215.185169	1.160875945	0.372909017	3.113027282	0.001851789	0.047565587
ZNF354B	128.4577291	-0.642247892	0.206372408	-3.112082169	0.001857728	0.047565587
ZWINT	484.0556499	1.338880642	0.429515454	3.117188519	0.001825848	0.047565587
EXO1	92.03726792	1.346234526	0.433733599	3.103828082	0.001910343	0.047636979
RASA4	362.0288228	-1.065027699	0.34329523	-3.102366727	0.0019198	0.047792739
R3HDM4	861.859437	0.545448354	0.175883313	3.101194442	0.001927417	0.04790226
TMEM241	147.0751104	0.507153302	0.163590955	3.100130462	0.001934354	0.047994552
CPEB1	94.58524811	-1.450576865	0.468155839	-3.098491453	0.001945086	0.048056429
DIXDC1	940.070309	-1.08041863	0.348766475	-3.097828223	0.001949444	0.048056429
PTRHD1	127.5773733	0.577568856	0.186446047	3.097780106	0.00194976	0.048056429
SPHK2	451.5237527	0.719362734	0.232149248	3.098708008	0.001943665	0.048056429
ARC	49.23530108	-1.294142535	0.418328808	-3.093601277	0.00197743	0.048295766
C16orf52	260.0508922	-0.591426589	0.191480985	-3.088696186	0.002010369	0.048295766
CCDC167	176.3982324	0.898339937	0.290637227	3.090932105	0.001995293	0.048295766
CDKL1	179.8506203	-0.937114209	0.303462914	-3.088068317	0.002014622	0.048295766
COLEC12	459.6147217	-1.303623923	0.421712687	-3.091260856	0.001993085	0.048295766
DENND2C	39.22164303	-1.075470462	0.34745479	-3.095281724	0.00196626	0.048295766
GALNT13	39.88453585	-1.44582151	0.468109759	-3.088637828	0.002010764	0.048295766
KIAA1755	255.6399943	-0.948491925	0.307109778	-3.088445867	0.002012063	0.048295766
MST1L	29.88771791	-0.993294381	0.321331356	-3.091184105	0.0019936	0.048295766
NR2F2	3083.752144	-0.971621538	0.314308967	-3.091294366	0.00199286	0.048295766
OVOL2	119.345532	0.980188006	0.317334197	3.088819344	0.002009536	0.048295766
PPP2R2C	1546.776417	-1.393080575	0.450162618	-3.094616298	0.001970677	0.048295766
PSMG3-AS1	104.9137285	-0.651734037	0.210943253	-3.089617833	0.002004142	0.048295766
RAB25	844.762647	1.168184267	0.377589233	3.093796551	0.001976129	0.048295766
RAB3D	835.3748127	0.658284088	0.213028484	3.090122389	0.00200074	0.048295766
SCD	2628.310855	1.030550802	0.333335857	3.091628997	0.001990615	0.048295766
SLC35C1	559.3047172	0.646972675	0.209313101	3.090932534	0.00199529	0.048295766
COPE	1624.459857	0.632150099	0.20483197	3.086188635	0.002027402	0.048523999
EPB41L4B	330.6969131	0.994907111	0.322433919	3.085615538	0.002031313	0.048539574
DSC2	447.2068138	1.313990904	0.426250282	3.082674567	0.002051494	0.048552898
FAM198B	2792.701479	-0.981989662	0.318629029	-3.081921523	0.002056691	0.048552898
LEPR	950.585616	-1.223840384	0.397187498	-3.081266125	0.002061223	0.048552898
LOC101928731	59.08137163	-1.544844689	0.500849314	-3.084450047	0.002039289	0.048552898
MAN1A1	1158.677683	-0.488800444	0.158509564	-3.083728398	0.002044241	0.048552898
NIPSNAP1	1196.871433	0.81487545	0.264431162	3.081616574	0.002058798	0.048552898
PLLP	429.378825	1.068471506	0.346622165	3.082525051	0.002052525	0.048552898
SOCS2	677.7052966	-1.20013671	0.389445197	-3.081657496	0.002058515	0.048552898
UBE2S	308.949911	0.785273362	0.25462636	3.084022256	0.002042223	0.048552898
MROH1	626.1151667	0.68794712	0.223302079	3.080791379	0.002064512	0.048553549
CIT	257.4524876	1.218969484	0.395747448	3.080170169	0.002068824	0.048578196
MYO15A	91.13776656	-1.231839949	0.400194591	-3.078102444	0.002083233	0.048839508
ALYREF	590.1025132	0.67589945	0.21979192	3.075178792	0.002103764	0.049071171
CCNB1	553.4440541	1.179137529	0.383652637	3.073450866	0.002115985	0.049071171
COL5A3	512.1902764	-1.256655819	0.409059701	-3.072059689	0.002125872	0.049071171
CYP2U1	259.8506185	-0.901538881	0.293317653	-3.073592304	0.002114982	0.049071171
GFER	278.2018727	0.408897391	0.132925357	3.076142875	0.002096973	0.049071171
HIVEP1	533.3454729	0.285029595	0.092735435	3.073578035	0.002115084	0.049071171
MAF	1005.422757	-1.168499113	0.380424241	-3.071568491	0.002129373	0.049071171
PMP22	1401.781737	-1.194022083	0.388270314	-3.075234034	0.002103374	0.049071171
SCML2	52.25334705	-0.90933318	0.29603457	-3.071712801	0.002128344	0.049071171
SLC25A27	171.2682349	-0.986900086	0.32125239	-3.07203967	0.002126015	0.049071171
TRIM26	1132.782674	0.437135515	0.142253022	3.072943609	0.002119585	0.049071171
CCSER1	53.4073515	0.923259604	0.300967667	3.06763718	0.002157584	0.049415313
FAM184A	52.68453038	-1.129370144	0.36812821	-3.067871772	0.002155891	0.049415313
PCDHGA7	24.08740327	-1.302668363	0.424526848	-3.068518205	0.002151232	0.049415313
WDFY3-AS2	31.26992721	-0.868461203	0.283103167	-3.067649199	0.002157497	0.049415313
ZNF300P1	70.3140534	-1.360451866	0.443909059	-3.064708501	0.002178822	0.049825084
INTS7	319.0379424	0.708508813	0.231342729	3.062593818	0.002194277	0.049870227
NCAPD2	1256.292537	0.738924863	0.241254492	3.062843965	0.002192443	0.049870227
PEG3	1015.211319	-1.449269197	0.473193727	-3.062739665	0.002193208	0.049870227
PHB	1682.371335	0.418646451	0.136716586	3.062148215	0.002197546	0.049870227
RASL11A	179.2671564	-1.139308962	0.371937952	-3.06316942	0.00219006	0.049870227
ABI3BP	766.3124028	-1.313883808	0.429240097	-3.060953103	0.002206336	0.049874635
ALG1	249.1692262	0.52145849	0.170369193	3.060755773	0.002207791	0.049874635
KIAA1644	915.73649	-1.387351139	0.453137597	-3.06165533	0.002201168	0.049874635
AURKA	142.7906619	1.194934864	0.390476292	3.060198247	0.002211905	0.049881966
PWP2	470.1675027	0.351454524	0.114861767	3.059804258	0.002214817	0.049881966
CYGB	198.6382164	-0.901995629	0.294869596	-3.058964508	0.002221035	0.049946439
RBM47	1314.677358	1.036144978	0.338796036	3.058314936	0.002225855	0.049960002
SLC7A5	1145.384692	1.09582116	0.358348129	3.057979303	0.00222835	0.049960002
LMNB2	1335.68316	0.817113331	0.267264573	3.057320028	0.002233257	0.049994733
MAMDC2	742.1097807	-1.478514687	0.483685794	-3.056766822	0.002237383	0.050011882
CAPN8	37.4261751	1.196582655	0.3915366	3.056119545	0.002242218	0.050044835
MAP7	571.6480535	1.013204792	0.33166689	3.054886768	0.002251455	0.050175766
CA11	698.0100132	-1.095117708	0.358551383	-3.054283878	0.002255985	0.050201567
TBC1D2B	1323.689172	-0.935378503	0.306357765	-3.053222769	0.002263978	0.050229271
ZNF577	179.3810499	-0.496553456	0.162614238	-3.053566897	0.002261383	0.050229271
ITM2B	9715.527586	-0.636133185	0.208460324	-3.051579182	0.00227641	0.050389855
KLC3	62.83304388	1.155053504	0.378535855	3.051371456	0.002277986	0.050389855
GALNT2	1708.018172	0.399968798	0.131114747	3.050524869	0.002284418	0.050457159
EDNRA	913.1851432	-1.19414635	0.3915469	-3.049816892	0.002289809	0.050501319
GPR176	91.05817667	-0.975686791	0.320021153	-3.048819685	0.002297423	0.050594291
SHROOM1	331.258398	-0.751013516	0.246382781	-3.048157481	0.002302492	0.050631023
PTN	987.5170015	-1.172613711	0.384797631	-3.047351692	0.002308674	0.050692084
CDCP1	773.6822297	0.843268873	0.276857096	3.045863319	0.002320133	0.050868655
PSMD8	1464.933883	0.501593429	0.164729831	3.044945945	0.002327221	0.050949035
AGPAT9	81.26663963	-1.155796275	0.379920111	-3.042208718	0.00234849	0.051014559
CARF	197.0703379	-0.686012974	0.225547333	-3.041547716	0.002353653	0.051014559
CDT1	129.6845328	1.140447873	0.374965089	3.041477477	0.002354202	0.051014559
JAM3	918.3207303	-1.214457716	0.399233369	-3.041974472	0.002350318	0.051014559
KPNA2	1210.398138	1.067253836	0.350750649	3.042770807	0.002344108	0.051014559
MARCKSL1	4404.791262	0.922004514	0.30293398	3.043582345	0.002337795	0.051014559
NAV1	790.8897231	0.673247262	0.221314855	3.042033769	0.002349855	0.051014559
NLRP7	26.20895055	1.576883877	0.518706315	3.040032155	0.002365529	0.051185507
GPT2	952.0186267	1.136918682	0.374355873	3.036999718	0.002389457	0.051375867
HRAS	311.3427034	0.410400227	0.135085439	3.038078943	0.002380916	0.051375867
NTN1	1371.619316	0.664268858	0.218685573	3.037552266	0.00238508	0.051375867
PRX	215.5708125	-1.13397488	0.373419506	-3.036731779	0.002391582	0.051375867
SGPP2	198.4447507	1.138931823	0.37499355	3.037203767	0.00238784	0.051375867
BCL11A	195.1686371	1.046092449	0.344813379	3.033793097	0.002415	0.051451283
FAM83H	720.3231692	1.299294684	0.428252431	3.033945849	0.002413778	0.051451283
LSM4	1021.570205	0.916615476	0.301936049	3.035793433	0.002399037	0.051451283
PRCC	979.1862413	0.243105255	0.080136021	3.033657692	0.002416084	0.051451283
PRRT1	80.64203534	-0.825709772	0.272049057	-3.035150284	0.002404159	0.051451283
RASEF	257.1821194	0.897384175	0.295848266	3.033258189	0.002419285	0.051451283
TOP2A	1393.268372	1.320466692	0.435100355	3.034855471	0.00240651	0.051451283
MYEOV2	371.9601096	0.438828209	0.14470461	3.032579337	0.002424733	0.051493591
CARM1	1198.217589	0.530613716	0.175084212	3.030620007	0.002440522	0.051689188
ENO1	15400.06156	0.908565485	0.299884633	3.029716714	0.002447832	0.051689188
PRR15L	245.7147218	1.149613163	0.379401105	3.030073314	0.002444944	0.051689188
USP43	388.0597389	1.164643193	0.384343373	3.030215363	0.002443794	0.051689188
DNAJB4	346.2268065	-0.786391135	0.259735141	-3.027665531	0.002464507	0.051967585
MDFIC	519.736736	-1.130563956	0.373468558	-3.027199835	0.002468307	0.051974101
ZBED4	507.791082	0.752008293	0.248517127	3.025981752	0.002478273	0.052110232
CDO1	118.8860434	-1.378069345	0.455618493	-3.024612404	0.002489519	0.052272886
CHAC2	23.64833384	1.162018062	0.384266019	3.023993804	0.002494615	0.052306114
CLN6	497.0380855	0.504410059	0.166867772	3.022812934	0.00250437	0.052363141
MTMR11	303.3719781	-0.868504557	0.287303067	-3.02295609	0.002503186	0.052363141
CCDC6	1802.446201	0.630470836	0.208679275	3.021243181	0.002517391	0.052406694
COMMD5	345.7833204	0.452082033	0.149715914	3.019599056	0.002531095	0.052406694
ENTPD6	803.8898347	0.456893422	0.15119073	3.021967163	0.002511378	0.052406694
H2AFY2	1087.418951	0.828734033	0.274266592	3.021636818	0.00251412	0.052406694
SLC16A9	300.0842637	-1.018080036	0.337097371	-3.020136388	0.002526609	0.052406694
TRIM52	138.5917996	-0.445638823	0.147576925	-3.019705309	0.002530207	0.052406694
URB2	219.8314123	0.598431798	0.198156859	3.019990325	0.002527828	0.052406694
KRT18	3221.067603	1.133008318	0.375332284	3.018680687	0.00253878	0.052492794
MAGI2-AS3	367.7171911	-1.327330472	0.439894095	-3.017386428	0.002549646	0.05249872
SGPL1	2168.651734	0.759279518	0.251603033	3.01776775	0.00254644	0.05249872
SLC25A5	2450.712	0.630369857	0.208862975	3.018102447	0.002543629	0.05249872
ANXA2	8910.462778	0.948547273	0.314472025	3.016316864	0.002558657	0.052611506
C17orf67	46.36652258	-0.849949619	0.281833544	-3.015785869	0.002563142	0.052631027
NEDD4	277.9423993	-0.932010378	0.309151997	-3.014731873	0.002572065	0.052741509
GLT8D2	302.9931879	-1.210531832	0.401680508	-3.013668341	0.002581098	0.052781327
RCBTB2	420.9269154	-0.674238144	0.223702298	-3.013997404	0.0025783	0.052781327
ADAMTSL3	644.8677192	-1.400834104	0.465379993	-3.010086652	0.002611732	0.052787313
CDC20	336.8329498	1.285717217	0.427282329	3.009057781	0.002620593	0.052787313
CENPC	317.3372259	-0.391947993	0.130187261	-3.010647805	0.00260691	0.052787313
DLG4	549.2108689	-0.616620355	0.204947832	-3.008669816	0.002623941	0.052787313
NADSYN1	790.7515665	0.479833846	0.159393318	3.010376158	0.002609243	0.052787313
NT5DC2	521.299391	0.58670346	0.194990909	3.008875975	0.002622161	0.052787313
PDK4	1517.385707	-1.200075315	0.398689133	-3.010052736	0.002612023	0.052787313
PHYHIP	194.6793059	-1.289787041	0.428350295	-3.011056738	0.002603402	0.052787313
PKM	16115.56508	0.950003119	0.315511829	3.010990497	0.00260397	0.052787313
PROSER1	728.4798179	0.656160747	0.218064783	3.0090175	0.00262094	0.052787313
SLC18B1	466.0997964	0.54605	0.181490759	3.008693137	0.00262374	0.052787313
WHSC1	1350.719315	0.62821466	0.208760304	3.009263013	0.002618823	0.052787313
PAGE4	162.5670873	-1.460664567	0.485558864	-3.008213166	0.002627887	0.052795357
COMMD7	425.5809192	0.287717905	0.095668663	3.007441477	0.002634568	0.052858249
LINC00673	153.3570019	1.297643754	0.431749384	3.005548597	0.002651022	0.053045388
LRIG1	5064.858568	0.628848775	0.20922161	3.00565881	0.002650062	0.053045388
FAM83G	100.2861524	0.782405957	0.260393031	3.004711579	0.002658328	0.053120173
DHX37	534.0524199	0.571981031	0.190407977	3.003976203	0.002664762	0.053154024
NUSAP1	380.9051166	1.199280628	0.399267494	3.003702143	0.002667163	0.053154024
ATAD3A	392.505486	0.512324602	0.170657827	3.00205746	0.002681616	0.053237248
COA1	462.1829094	0.484818141	0.161536486	3.001291861	0.002688368	0.053237248
IGFBP2	4142.798954	1.113433262	0.37089692	3.002001906	0.002682105	0.053237248
MKI67	982.9133501	1.290740762	0.429996032	3.001750404	0.002684322	0.053237248
PRDX5	2285.817595	0.352119417	0.117326389	3.001195385	0.00268922	0.053237248
RACGAP1	387.3040425	1.004600183	0.33490657	2.999643106	0.002702961	0.053367351
STAP2	465.9299382	0.939083059	0.313024844	3.00002724	0.002699555	0.053367351
SLC31A1	997.7992007	0.723896353	0.241428139	2.998392632	0.002714078	0.05351586
GABRB3	68.86664963	-1.286473812	0.429261511	-2.996946567	0.002726985	0.053557555
PCDHB10	122.1128895	-0.703138565	0.234575071	-2.997499101	0.002722047	0.053557555
RCC2	3376.59144	0.865754357	0.288863542	2.997104971	0.002725568	0.053557555
GRIA2	762.1851331	-1.288456066	0.429995014	-2.996444202	0.002731482	0.053575199
KIF20A	219.3774139	1.249534595	0.417207839	2.994993093	0.002744511	0.053759906
LAMTOR1	1008.691408	0.334710381	0.111803818	2.993729432	0.002755902	0.053821459
LLGL2	1353.469767	1.021877557	0.341319921	2.993899552	0.002754366	0.053821459
TSSC1	302.7678524	0.663692473	0.221715491	2.993442045	0.002758499	0.053821459
HRC	92.45538511	-1.491343782	0.498375302	-2.992411094	0.002767833	0.053860167
KATNAL1	345.5241539	-0.920790852	0.307748392	-2.992024897	0.002771337	0.053860167
MAPRE3	356.3837889	-0.729659789	0.243858572	-2.992143294	0.002770262	0.053860167
FXYD1	467.1964075	-1.408102558	0.47075329	-2.991168807	0.002779118	0.053940981
GOLGA8H	30.23682545	-0.965111149	0.322828531	-2.98954725	0.002793912	0.054157516
LUM	5683.08693	-1.047739843	0.350536927	-2.988957118	0.002799314	0.054191664
ATP5B	6468.53777	0.501782017	0.168015913	2.986514835	0.002821771	0.054203499
CTSF	1525.440334	-1.127911868	0.377534037	-2.987576635	0.002811988	0.054203499
MTRR	449.9584271	-0.453807412	0.151932955	-2.986892547	0.002818288	0.054203499
NFAT5	1721.390321	-0.49144666	0.164504832	-2.987429938	0.002813338	0.054203499
OSGIN1	61.49316581	0.508703903	0.170228172	2.988364957	0.002804744	0.054203499
RAB20	434.7610107	0.77731389	0.260207538	2.987284285	0.002814679	0.054203499
BABAM1	956.7918298	0.444934941	0.149144887	2.983239657	0.002852146	0.054415589
CLIP3	912.8749039	-1.189051446	0.398550152	-2.983442458	0.002850256	0.054415589
GRID1	83.56804541	-1.290211298	0.432527048	-2.982960957	0.002854744	0.054415589
HAGH	372.7289199	0.290799433	0.097469981	2.983476856	0.002849936	0.054415589
RFTN2	66.58936893	-1.108638812	0.371534343	-2.983947065	0.00284556	0.054415589
SLC25A39	1426.025137	0.635525912	0.212980136	2.983968005	0.002845365	0.054415589
FEN1	431.7069371	0.945870357	0.317170361	2.982215473	0.002861705	0.054478522
AP1S1	535.4609306	0.654260204	0.219488295	2.980843257	0.002874559	0.054488082
FCER1A	33.657884	-1.317145795	0.441906335	-2.980599485	0.002876848	0.054488082
KIF18B	169.5981202	1.261623716	0.423150822	2.981498914	0.002868411	0.054488082
SAMD8	655.4840566	-0.523229622	0.175520876	-2.981010779	0.002872987	0.054488082
SFRP4	14449.16513	-1.414366945	0.474605219	-2.980091429	0.002881624	0.054509188
ACOX3	241.9465437	0.465122589	0.156153074	2.978632301	0.00289538	0.054699902
DDX28	149.7609288	0.431792683	0.144986406	2.978159775	0.002899848	0.054710574
FNDC5	81.82398544	-1.439003178	0.483244439	-2.977795628	0.002903295	0.054710574
EIF5A	3308.879623	0.543143955	0.182425663	2.977344015	0.002907576	0.054721969
ADGRL4	371.968996	-0.94150829	0.316344432	-2.976212616	0.002918325	0.054745803
CKAP2L	68.51253978	1.272050984	0.427776337	2.973635694	0.002942943	0.054745803
ERO1B	188.3168075	-1.067451755	0.359031498	-2.97314236	0.002947677	0.054745803
FZD8	276.9014992	1.005300668	0.338121634	2.973192391	0.002947197	0.054745803
GCFC2	301.2719309	-0.442514272	0.148699565	-2.975894876	0.00292135	0.054745803
MFSD3	208.2171879	0.792107883	0.266407508	2.97329414	0.00294622	0.054745803
NMT1	1423.115418	0.261695179	0.087934004	2.976040759	0.002919961	0.054745803
RHOJ	471.563063	-1.145729066	0.385253036	-2.973965052	0.002939786	0.054745803
SPINT2	5604.19604	0.971169901	0.326462104	2.974831958	0.002931491	0.054745803
TMEM220	85.75004374	-0.904987213	0.304347341	-2.973534157	0.002943916	0.054745803
VSTM4	618.2611631	-1.253403467	0.421599192	-2.972974073	0.002949294	0.054745803
IL6ST	3435.212623	-0.669504847	0.22523766	-2.972437412	0.002954454	0.054773303
COL4A3	54.47840852	-1.162423057	0.391233823	-2.971172193	0.002966654	0.054840972
PLAGL2	618.0858479	0.571375841	0.192287388	2.971468108	0.002963797	0.054840972
SIMC1	260.5384892	-0.811406779	0.273116949	-2.970913305	0.002969156	0.054840972
ELAC2	1010.265506	0.320657309	0.10796751	2.969942609	0.002978554	0.054882766
PFN1	6411.373519	0.378785079	0.127540582	2.969918062	0.002978792	0.054882766
ZDHHC5	1596.447325	0.345735148	0.116429896	2.969470568	0.002983134	0.054894826
UST	163.0267021	-1.190261982	0.400961712	-2.968517809	0.002992398	0.054997313
CDC6	255.7365895	1.268237149	0.427286386	2.968119719	0.002996276	0.055000692
LRBA	1767.23852	0.562287625	0.189492394	2.967336123	0.003003924	0.055073167
GCA	315.9320777	0.67365877	0.227077863	2.966642198	0.003010711	0.055129711
MTCH2	888.2122372	0.608888963	0.205335622	2.965335277	0.003023532	0.055280353
SIPA1L1	984.1291852	0.48019219	0.16195094	2.965047249	0.003026364	0.055280353
GOLGA8B	553.3503471	-0.768971516	0.259468037	-2.963646408	0.003040174	0.055379048
PDGFRA	1996.994294	-0.927705124	0.313057706	-2.963367793	0.003042927	0.055379048
ZMYM6NB	318.2930171	-0.802600793	0.27077541	-2.964083016	0.003035864	0.055379048
KBTBD6	408.7460241	-0.485343667	0.163807392	-2.962892346	0.003047631	0.055396933
GNAL	156.0154517	-1.199752624	0.404980241	-2.962496689	0.003051551	0.055400535
GEM	971.8769882	-1.195886064	0.403951946	-2.960466153	0.003071739	0.055631356
SAPCD2	380.2436493	1.306397404	0.441267824	2.960554413	0.003070859	0.055631356
REM1	87.67243495	-1.299540672	0.439162751	-2.959132282	0.003085066	0.05580484
NDNF	234.6329034	-1.200864706	0.40588141	-2.958659045	0.003089808	0.055822773
NIPSNAP3B	120.9295675	-0.719087679	0.243193913	-2.956849	0.003108003	0.05608344
ALAS1	717.1427279	0.529889925	0.179262801	2.955939109	0.003117186	0.056092752
CENPN	129.5141073	0.932501297	0.315517704	2.955464257	0.003121989	0.056092752
GIMAP8	374.9168192	-0.920603825	0.311487604	-2.955507104	0.003121555	0.056092752
SRPX	265.3933016	-1.309833479	0.443214161	-2.955306025	0.00312359	0.056092752
ADCK3	888.3764127	-0.655475611	0.221913645	-2.953741811	0.003139465	0.0561072
AQP5	1303.488875	1.358453635	0.459858813	2.954066763	0.003136162	0.0561072
LRRC4B	227.87936	-1.368065473	0.46306945	-2.954341887	0.003133367	0.0561072
PLEKHH2	622.8821551	-1.132882571	0.383541567	-2.953741313	0.00313947	0.0561072
C9orf3	583.9052353	-0.906093674	0.306902606	-2.952381821	0.003153327	0.056126175
EMG1	358.0654882	0.41972413	0.14212688	2.953165013	0.003145338	0.056126175
METTL13	798.9641746	0.51981684	0.176039342	2.952844708	0.003148603	0.056126175
MSTN	98.40863014	-1.47910865	0.501026227	-2.952158131	0.003155613	0.056126175
CLIC1	2877.776932	0.440835411	0.149389915	2.950904761	0.003168446	0.056287178
AKT1	2702.643803	0.32579215	0.110505246	2.948205283	0.003196247	0.056378482
CDCA8	183.1090118	1.225115232	0.415390059	2.949312831	0.003184814	0.056378482
CLDN7	1253.655403	1.069025546	0.362514149	2.948920886	0.003188856	0.056378482
PGAP2	345.139086	0.444787605	0.150842723	2.948684529	0.003191296	0.056378482
PROM2	568.4806736	0.983090102	0.333454412	2.948199414	0.003196308	0.056378482
UNC5D	38.05683579	-1.462937523	0.496059272	-2.949118392	0.003186819	0.056378482
SYT17	201.7177846	1.26207104	0.428250049	2.947042371	0.003208292	0.056522898
CCDC51	198.7592742	0.572057133	0.194148282	2.946495987	0.003213966	0.056555922
CNRIP1	294.8256167	-1.223127384	0.415316992	-2.945045366	0.003229073	0.056754677
ZNF438	187.9642917	-0.71418413	0.242535486	-2.944658288	0.003233115	0.05675871
ART5	36.65682845	-1.231177574	0.418466168	-2.942119744	0.003259739	0.057158689
NADK2	379.7447626	-0.498369252	0.169428297	-2.941475903	0.003266523	0.05721026
SRMS	41.62041107	1.212963005	0.412567228	2.940037214	0.003281728	0.057409035
CALCRL	640.6575467	-0.718342482	0.244459387	-2.938494162	0.003298109	0.057499586
DBI	837.9119162	0.756164892	0.257333081	2.938467484	0.003298393	0.057499586
EPM2AIP1	689.4079269	-0.607815238	0.206873896	-2.938095378	0.003302354	0.057499586
RASAL1	92.24887688	1.335470134	0.454527229	2.938152101	0.00330175	0.057499586
CACFD1	459.1050753	0.682657785	0.232381975	2.937653773	0.003307061	0.057514276
PDE4C	112.6051894	-1.269384964	0.432201496	-2.937021217	0.003313814	0.057564473
ACOX2	162.4617753	-1.235314715	0.421085639	-2.933642472	0.003350099	0.057651821
CDCA3	83.90049585	1.134052034	0.38650563	2.934115176	0.003345001	0.057651821
DPYSL2	873.6806272	-0.857057865	0.292039395	-2.934733735	0.00333834	0.057651821
EPPK1	205.218861	1.256939561	0.428490523	2.933412747	0.003352579	0.057651821
MTMR1	469.285605	0.342864704	0.116800811	2.935465102	0.003330481	0.057651821
NEDD4L	647.0357255	0.52096675	0.177588962	2.933553665	0.003351057	0.057651821
RPRM	226.7973341	-1.446877917	0.492874005	-2.935593889	0.003329098	0.057651821
SHCBP1	99.43706541	1.116242101	0.380540201	2.933309277	0.003353696	0.057651821
SLC26A4	39.27154067	-0.988994072	0.3371193	-2.933661978	0.003349888	0.057651821
GTSE1	158.1154375	1.265434629	0.431731381	2.931069375	0.003377973	0.057935356
SLC39A11	434.6653681	0.74721911	0.254901005	2.931409044	0.003374282	0.057935356
ADGRF1	59.90268297	1.318262543	0.449962961	2.929713459	0.003392747	0.057996388
BCAP29	858.2984172	-0.853205348	0.291229144	-2.929670209	0.003393219	0.057996388
CLPTM1L	1166.800574	0.310668078	0.10602179	2.930228556	0.003387128	0.057996388
MAP4K3	589.0539143	-0.337877295	0.115443956	-2.926764711	0.003425079	0.058106543
PDE8B	492.367576	-1.173753748	0.400817707	-2.928397939	0.003407137	0.058106543
PNISR	1475.381234	-0.46514667	0.158917941	-2.926961339	0.003422914	0.058106543
PTBP1	3594.370468	0.374759907	0.128033082	2.927055277	0.003421881	0.058106543
PYGM	107.4797226	-1.206115089	0.412122795	-2.926591551	0.003426986	0.058106543
SLC52A2	567.030735	0.730960397	0.249727415	2.927033055	0.003422125	0.058106543
ZNHIT1	530.2992177	0.348275206	0.119003157	2.926604764	0.003426841	0.058106543
BRI3BP	61.08683276	0.754717198	0.258014003	2.925101693	0.003443437	0.058232029
KLF9	1505.000871	-1.114749868	0.381109599	-2.925011258	0.003444438	0.058232029
SMARCD2	1171.939495	0.561965262	0.19213413	2.924859118	0.003446122	0.058232029
ARF3	3458.440411	0.453397706	0.15507988	2.923639778	0.003459649	0.058394318
NCLN	963.7251182	0.514498905	0.176178482	2.920327714	0.003496635	0.058951757
GHR	102.3032959	-1.309798365	0.448804885	-2.918413787	0.003518171	0.059180812
SCGB3A1	341.8397446	-1.293825656	0.443288486	-2.918698987	0.003514955	0.059180812
MVD	467.5101671	0.435472685	0.14923756	2.917983154	0.003523034	0.059195716
MRPL15	513.8101688	0.693095446	0.237603174	2.917029413	0.003533824	0.059274614
PPIA	8667.582497	0.569802489	0.195347878	2.916860404	0.00353574	0.059274614
S1PR3	607.4377667	-0.81151611	0.278248709	-2.916513474	0.003539674	0.059274614
EEA1	687.8309658	-0.433916152	0.14881898	-2.915731255	0.00354856	0.059352701
PCDHB18P	29.18800732	-1.2314126	0.42238181	-2.91540159	0.003552311	0.059352701
TMEM164	509.0255004	0.564879619	0.193814438	2.914538384	0.00356215	0.059450367
VPS72	696.31945	0.331742307	0.113842695	2.914041225	0.003567828	0.059478448
CTNNA1	6910.911292	0.467567158	0.160656128	2.910359935	0.003610127	0.059517128
CX3CR1	84.40456091	-1.044798055	0.358867909	-2.911372206	0.003598451	0.059517128
GINS4	141.2077189	1.038191775	0.356688548	2.910639497	0.003606899	0.059517128
GSTM2	441.7224563	-1.219778565	0.419063755	-2.91072313	0.003605934	0.059517128
PABPC5	49.07281414	-1.225547807	0.420699864	-2.913116718	0.003578408	0.059517128
PSMD3	1604.58528	0.410979405	0.141086552	2.912959455	0.003580211	0.059517128
RFXANK	626.1722138	0.643185577	0.220941731	2.911109524	0.003601477	0.059517128
RIPK4	505.2070034	1.033407956	0.354891989	2.911894291	0.003592442	0.059517128
TFPT	318.7001477	0.550093778	0.189000537	2.910540822	0.003608038	0.059517128
TSHZ3	818.1995157	-1.231747905	0.422962195	-2.912193855	0.003588998	0.059517128
CBX2	349.2506347	1.219671698	0.419278833	2.908975129	0.003626157	0.059715266
ABCG2	533.312804	-1.264690406	0.436019425	-2.900536839	0.00372524	0.060102279
APRT	724.0127519	0.460900846	0.15857336	2.906546504	0.003654426	0.060102279
BZW2	666.3672159	0.824626305	0.284237091	2.901191757	0.003717463	0.060102279
DOLPP1	264.2037656	0.632223486	0.218004478	2.900048162	0.003731053	0.060102279
EFEMP1	1548.065366	-1.284561688	0.442088039	-2.905669401	0.003664684	0.060102279
EIF4A3	1112.977078	0.396168095	0.136441948	2.903565216	0.003689401	0.060102279
ERBB3	1481.014388	0.985227322	0.339018464	2.906117002	0.003659446	0.060102279
EZH2	235.8215233	1.112265943	0.383343145	2.901489062	0.003713937	0.060102279
FOXA1	508.7445057	1.409851403	0.486047042	2.900648044	0.003723919	0.060102279
HLF	574.3675185	-1.385137559	0.477165336	-2.902846153	0.003697882	0.060102279
IER2	4077.376705	-0.786774663	0.271291758	-2.900105289	0.003730373	0.060102279
INPP5J	137.8887327	0.558787047	0.192700886	2.899763763	0.00373444	0.060102279
KIAA1211	280.2531768	0.785392543	0.270733451	2.900980798	0.003719967	0.060102279
KRT19	3865.642409	0.859444967	0.296020303	2.90333115	0.00369216	0.060102279
NCAPH	153.9652232	1.215382836	0.418874887	2.901541422	0.003713317	0.060102279
TAF10	375.1559972	0.350663079	0.120876969	2.900991662	0.003719838	0.060102279
TES	1755.715638	0.437585927	0.15070744	2.903545614	0.003689632	0.060102279
TET3	773.1747335	0.805056144	0.277519773	2.900896524	0.003720967	0.060102279
TMEM178B	53.4671968	-1.225847888	0.42202995	-2.904646669	0.003676679	0.060102279
USP51	100.1609229	-1.080887456	0.372543738	-2.90137062	0.003715342	0.060102279
ZNF486	180.1452059	-1.374354616	0.47391125	-2.900025302	0.003731325	0.060102279
FMO2	296.3160369	-1.426565577	0.492076138	-2.899074893	0.003742655	0.060169441
CTSK	1599.733133	-1.030355038	0.355609608	-2.897433067	0.0037623	0.060289948
RECK	364.3265432	-1.105939247	0.381617863	-2.898027986	0.003755171	0.060289948
ZDHHC16	388.3033469	0.474517952	0.163757459	2.89768756	0.003759249	0.060289948
C1orf122	220.8432029	0.609842179	0.21050655	2.897022346	0.003767229	0.060304023
CALR	14232.13588	0.611999901	0.211341313	2.89578925	0.003782063	0.06034152
FOSL1	46.84287111	0.933490248	0.322432026	2.895153622	0.00378973	0.06034152
IGIP	222.1292975	-0.804931431	0.278092482	-2.894473904	0.003797945	0.06034152
MELK	176.3666284	1.281216012	0.442416058	2.895952779	0.003780093	0.06034152
MYCT1	181.7759536	-1.092127687	0.377283197	-2.894715946	0.003795018	0.06034152
RECQL4	326.8040248	1.017455409	0.351503752	2.894579082	0.003796673	0.06034152
TBC1D19	160.1312069	-0.499231283	0.172373542	-2.89621759	0.003776904	0.06034152
TK1	376.349822	1.206913264	0.417423348	2.891341058	0.003836016	0.060881414
VPS13B	1185.422223	-0.454062473	0.157096362	-2.89034365	0.003848209	0.061009891
APOBEC3B	45.32494093	1.124957609	0.389571017	2.887683013	0.003880908	0.061028639
FXYD6	1528.787406	-1.255423234	0.434585442	-2.888783452	0.003867353	0.061028639
HCAR2	23.50591985	1.194925518	0.413815653	2.887579307	0.003882187	0.061028639
KDF1	184.0590689	1.044300111	0.361534536	2.88852103	0.003870581	0.061028639
PTTG1	149.7595305	1.140725914	0.394882517	2.888772899	0.003867483	0.061028639
RAMP2-AS1	29.21226617	-1.300292259	0.450018293	-2.889420897	0.003859521	0.061028639
SLC38A7	417.8840391	0.671294793	0.232471206	2.88764706	0.003881351	0.061028639
TPI1	7909.003014	0.887493183	0.307315898	2.887885689	0.003878408	0.061028639
ARPC4	1038.026763	0.347795861	0.120467945	2.887040713	0.003888839	0.061068721
CHRD	617.3683091	-1.057199153	0.366602114	-2.883778111	0.003929355	0.061639947
SBNO2	1409.973885	0.532950237	0.184845858	2.88321439	0.003936394	0.061678434
SLC2A1	2017.648207	0.791689807	0.274614017	2.882918415	0.003940095	0.061678434
JUP	3643.371253	0.700519438	0.243036985	2.882357343	0.003947118	0.061723476
LDHA	6823.56637	0.842579834	0.292417619	2.881426355	0.003958797	0.061770595
SLC9B2	133.1661056	-0.844978425	0.293280681	-2.881125413	0.003962579	0.061770595
ZNF101	263.8785638	0.778059819	0.270015554	2.881537034	0.003957407	0.061770595
TUBA1B	9403.884973	0.740951532	0.257212562	2.880697293	0.003967965	0.061789852
IGFBP3	11842.47685	-1.003480227	0.348463625	-2.879727338	0.003980192	0.061792054
LINC01116	92.85418256	-1.266652738	0.439883249	-2.879520284	0.003982807	0.061792054
MAGEH1	386.5132199	-1.011657398	0.351366515	-2.879208335	0.003986749	0.061792054
NR5A2	209.9158627	-0.841139988	0.292031921	-2.880301532	0.00397295	0.061792054
NUDT11	71.58053645	-1.320818175	0.458777082	-2.878997723	0.003989412	0.061792054
TBC1D7	152.8952772	0.924365294	0.321103627	2.878713335	0.003993011	0.061792054
ABCG1	622.8923445	0.974852246	0.33870508	2.878174272	0.003999841	0.061833473
PINLYP	38.51105888	-1.007085939	0.349945114	-2.877839694	0.004004086	0.061834877
PRR26	53.09090337	-0.893541665	0.310640238	-2.876451782	0.004021736	0.062043098
TBX3	1248.376042	-1.096299847	0.381176543	-2.876094729	0.004026289	0.062049025
HAND2	859.7626355	-1.306483347	0.454388509	-2.875256136	0.004036999	0.062145917
SLC7A8	758.4586104	-1.044630131	0.363356028	-2.874949222	0.004040925	0.062145917
CDC45	119.2858135	1.26787096	0.44116006	2.873947749	0.00405376	0.062214772
ELK4	797.625258	-0.449384038	0.156349754	-2.874222872	0.00405023	0.062214772
PYGO1	312.5470406	-0.907350635	0.315809571	-2.873094162	0.004064729	0.062318875
PCBP3	99.92656129	-1.371677786	0.477716251	-2.871323267	0.004087573	0.062476074
PPP1R37	609.1965825	0.466309805	0.162401671	2.871336241	0.004087405	0.062476074
TSPAN4	591.607228	-0.692428153	0.24109856	-2.871971334	0.0040792	0.062476074
PIANP	189.3379575	-1.183619606	0.41232116	-2.870625427	0.004096606	0.062549927
PIGC	485.2919419	0.298110335	0.103866972	2.870116751	0.004103203	0.062586453
LETM1	634.1348381	0.43299531	0.150888704	2.8696337	0.004109476	0.062617976
CRYAB	454.7374039	-1.220516091	0.425408121	-2.869047464	0.0041171	0.06267001
ESRP2	520.317281	1.136932176	0.396397133	2.868164479	0.004128608	0.062780994
PNP	671.0032265	0.965172352	0.33659943	2.867421227	0.004138318	0.062835372
SLC25A44	449.9156823	0.497838282	0.173629501	2.867244791	0.004140626	0.062835372
HOOK2	610.3547403	0.703845011	0.245515923	2.866799852	0.004146452	0.062859698
DSG2	1483.208344	0.823048977	0.287212689	2.865642814	0.004161635	0.062961648
ZCCHC11	790.5189721	-0.31031213	0.108284621	-2.86570823	0.004160775	0.062961648
HSD17B10	748.3818525	0.487476046	0.170194686	2.864226016	0.004180296	0.063051742
PAPPA2	33.81389726	-1.43901261	0.502373294	-2.864428956	0.004177619	0.063051742
TOP3A	345.3140992	0.386352059	0.134884291	2.864322119	0.004179028	0.063051742
GPM6A	92.68567118	-1.390674694	0.485660877	-2.863468646	0.004190303	0.063092279
KRT7	1570.094744	1.285524737	0.44909356	2.862487578	0.004203297	0.063092279
PCGF5	847.6273837	-0.522372669	0.182493275	-2.86242148	0.004204174	0.063092279
RIC3	102.5225409	-1.354841905	0.473293729	-2.862581569	0.004202051	0.063092279
SPAG5	362.5968056	1.11668097	0.390000199	2.863283082	0.004192758	0.063092279
EMCN	410.3241779	-1.154954741	0.403869169	-2.859724954	0.004240086	0.063503176
TWF2	830.4709824	0.566811554	0.198183515	2.860033807	0.004235958	0.063503176
MCM2	713.5061046	0.720476112	0.252038876	2.858591192	0.004255268	0.063666504
ST6GALNAC1	1609.95645	0.867147553	0.303474437	2.857398997	0.004271285	0.063841995
CTNNBIP1	697.0242364	0.523402326	0.183219338	2.856698056	0.004280728	0.063870367
NDUFS8	643.1167654	0.392677194	0.137462113	2.856621245	0.004281764	0.063870367
ABHD11	461.2319683	0.646778135	0.22653852	2.85504706	0.004303045	0.064123558
IGFBP4	10408.72	-0.8577403	0.3005354	-2.854041	0.004316702	0.06422698
ZEB2	784.2324	-1.027092	0.3598908	-2.8539	0.004318614	0.06422698
ARHGEF34P	46.60261	0.8453932	0.2963544	2.852643	0.004335732	0.06435298
PTPRN2	179.2687	-1.239201	0.4343773	-2.85282	0.004333311	0.06435298
BST1	57.69599	-0.985202	0.3454998	-2.851527	0.004350982	0.06439438
PHYHIPL	144.6012	1.225564	0.4297978	2.851489	0.004351498	0.06439438
RBBP8NL	92.49306	1.150141	0.4032867	2.85192	0.004345609	0.06439438
NRXN1	34.09583	-1.478572	0.5186688	-2.850705	0.00436224	0.0644268
NUP188	966.8154	0.3831691	0.1344124	2.850698	0.004362344	0.0644268
PRLHR	50.42946	-1.478222	0.5187878	-2.849377	0.004380492	0.0646307
UBE2T	143.9929	1.021336	0.3584854	2.849032	0.004385248	0.06463683
COX6A1	1583.372	0.6135601	0.2153981	2.848494	0.004392673	0.06468222
CRTAP	3309.061	-0.7059064	0.2479507	-2.846962	0.004413859	0.06487972
ZNF208	72.95253	-1.265517	0.4445255	-2.846894	0.004414802	0.06487972
PSMC4	1415.532	0.5732412	0.2014052	2.846209	0.004424319	0.06493735
TMEM200B	606.575	-1.297078	0.4557574	-2.845984	0.004427447	0.06493735
GNG2	252.6795	-0.5718494	0.2010026	-2.844985	0.00444135	0.06507714
PROSER2	260.5976	1.075057	0.3779648	2.84433	0.004450494	0.06513951
SLC35F1	62.55983	-1.321419	0.4646765	-2.843741	0.004458733	0.06513951
STX2	273.2618	-0.7212207	0.2536074	-2.843848	0.004457235	0.06513951
FGF13	141.7878	-0.9944754	0.3499616	-2.84167	0.004487787	0.06530762
LSM12	674.0644	0.4505781	0.1585589	2.841708	0.004487253	0.06530762
THEM6	523.8981	0.8715092	0.3066345	2.842176	0.004480681	0.06530762
UBE2M	619.3144	0.3519918	0.1238648	2.841742	0.004486777	0.06530762
CALHM2	539.0421	-1.062115	0.3739672	-2.840128	0.004509547	0.06535279
CASP6	342.6687	0.7266479	0.2558994	2.839585	0.004517231	0.06535279
CENPF	844.9733	1.21636	0.4282051	2.840602	0.004502842	0.06535279
EPHX2	362.1771	-0.9039495	0.3183231	-2.839723	0.004515266	0.06535279
NLGN2	1079.058	-0.8218875	0.2893211	-2.840745	0.004500825	0.06535279
NOP10	504.3005	0.5816274	0.2047792	2.840266	0.004507594	0.06535279
LINC00639	40.60488	-1.256066	0.4424678	-2.838773	0.004528734	0.06545559
N4BP2L2-IT2	34.31299	-0.8816912	0.310638	-2.838324	0.004535116	0.06548426
MKLN1	1109.836	-0.413923	0.145856	-2.837888	0.004541308	0.06551012
ADAMTS15	230.5575	1.169322	0.412133	2.837243	0.004550494	0.06557909
KPNA5	150.4262	-0.7043668	0.2483298	-2.836416	0.004562293	0.06562208
LPAR2	316.0544	0.9717295	0.3425813	2.836493	0.004561202	0.06562208
NEK6	848.6599	0.8585304	0.3027513	2.835761	0.004571658	0.06562997
ZNF449	99.42891	-0.4827674	0.1702344	-2.835898	0.004569707	0.06562997
ATP8B2	1189.359	-0.7698774	0.2716377	-2.834206	0.004593965	0.06563267
CSTF2	348.4464	0.5013598	0.1769148	2.833905	0.004598299	0.06563267
MOXD1	1488.859	-0.9308973	0.3284331	-2.834359	0.004591778	0.06563267
SP3	1506.608	-0.3371879	0.1189582	-2.834507	0.004589644	0.06563267
TIMP2	10050.66	-1.038768	0.3664281	-2.834848	0.004584743	0.06563267
ZNF711	211.6145	-0.6116258	0.2157165	-2.835323	0.004577943	0.06563267
FLAD1	509.2404	0.5700835	0.201218	2.833164	0.004608971	0.06572198
CFAP97	711.7625	-0.3388407	0.1196608	-2.831677	0.004630462	0.06596525
ANKS1A	979.0723	0.540889	0.1910756	2.830759	0.004643775	0.06602854
STXBP5L	40.12706	-1.388634	0.4905424	-2.830813	0.00464299	0.06602854
ADAMTS9-AS2	78.43683	-1.339223	0.4737501	-2.826856	0.004700745	0.06603027
ANXA2P2	82.2318	0.9830894	0.3475567	2.828573	0.004675608	0.06603027
CHD7	666.3545	0.9085393	0.3211516	2.829005	0.004669304	0.06603027
DHTKD1	862.8776	0.7011526	0.2480035	2.827189	0.004695866	0.06603027
EIF2B5	734.6057	0.3033691	0.1073054	2.827155	0.00469636	0.06603027
FOXM1	353.9704	1.228937	0.4342525	2.830005	0.004654733	0.06603027
HPSE2	153.3995	-1.448423	0.5120451	-2.828702	0.004673725	0.06603027
ISG20L2	619.7932	0.3818257	0.1350478	2.827337	0.004693695	0.06603027
MYO5B	782.3104	0.9730671	0.3439264	2.829289	0.004665161	0.06603027
PAK4	1066.994	0.5253792	0.1858364	2.827106	0.004697077	0.06603027
PPM1G	1716.256	0.4789998	0.1694329	2.827076	0.004697515	0.06603027
SERINC2	3364.349	0.938943	0.3321575	2.826801	0.004701557	0.06603027
STAT3	4127.787	0.4064957	0.143652	2.829726	0.004658781	0.06603027
GDE1	1000.891	0.5723296	0.2025401	2.825759	0.004716874	0.06605843
NME1	146.2262	0.9151026	0.3237993	2.826142	0.00471124	0.06605843
SNAP25	108.1697	-1.250313	0.4424257	-2.826042	0.004712711	0.06605843
ILF2	2388.175	0.5914828	0.2093901	2.824788	0.004731183	0.06619655
SPARCL1	15673.48	-1.258375	0.4456064	-2.82396	0.004743431	0.06630559
ASNA1	941.4674	0.4037484	0.1430932	2.821576	0.004778838	0.06631977
HOXA10	461.1609	-0.7512731	0.266268	-2.821492	0.004780084	0.06631977
KCNQ1OT1	523.3195	-0.4308888	0.1526524	-2.82268	0.004762406	0.06631977
OLFML1	324.5547	-1.069077	0.3788263	-2.822077	0.004771374	0.06631977
PFKFB4	230.6493	1.045238	0.3702923	2.822738	0.004761548	0.06631977
PPP1R3E	146.1981	-0.8128202	0.2879806	-2.822482	0.004765344	0.06631977
RCC1	899.2366	0.8334338	0.2952805	2.822516	0.004764844	0.06631977
SUSD2	239.18	0.9687485	0.3433006	2.821866	0.004774505	0.06631977
DNMT3B	164.992	1.174201	0.4163401	2.820292	0.004797993	0.06639981
MGAT5	1366.711	0.3568081	0.1265183	2.820209	0.004799234	0.06639981
TUFM	2310.28	0.3971157	0.1408036	2.820352	0.004797103	0.06639981
C9orf16	409.2684	0.6106517	0.2166264	2.818916	0.004818609	0.06660597
ELOVL1	860.438	0.3727893	0.1323056	2.817638	0.004837839	0.06680533
LPCAT1	752.5976	0.4434164	0.1573872	2.817361	0.004842007	0.06680533
SLC23A2	702.9177	-0.9393782	0.3335202	-2.816555	0.004854166	0.06691108
ADGRG1	2144.36	0.9632848	0.3422682	2.814415	0.004886614	0.06698621
CEP290	464.6215	-0.4659521	0.1655254	-2.814989	0.004877891	0.06698621
FURIN	1985.331	0.5386578	0.1913142	2.815567	0.004869126	0.06698621
LGALS3BP	7514.621	0.5370266	0.1907842	2.814838	0.004880177	0.06698621
MST1R	200.6026	0.8371626	0.2974293	2.814661	0.004882877	0.06698621
SLC43A2	653.6984	0.5261443	0.1868715	2.815541	0.004869511	0.06698621
AASS	513.1182	-0.8562168	0.3049284	-2.807928	0.004986143	0.06707868
ASPM	188.908	1.187571	0.4227344	2.80926	0.004965555	0.06707868
CCBE1	306.7297	-1.416299	0.5040339	-2.809927	0.004955266	0.06707868
CEBPA-AS1	54.65697	-1.229927	0.4380232	-2.807904	0.004986515	0.06707868
CLMP	451.9143	-1.171633	0.4169232	-2.81019	0.004951228	0.06707868
DCAF12	1096.521	0.5209907	0.1854114	2.809918	0.004955417	0.06707868
ELMO3	219.6743	0.9038177	0.3213995	2.812131	0.004921442	0.06707868
FAM96B	640.415	0.366561	0.1304953	2.808997	0.004969616	0.06707868
FBN2	741.7809	1.093749	0.3888444	2.81282	0.004910914	0.06707868
FH	705.8379	0.3443164	0.1226344	2.807665	0.004990207	0.06707868
FUOM	74.34324	0.8921154	0.317523	2.809609	0.004960171	0.06707868
GCDH	357.6299	0.4050162	0.144052	2.811598	0.004929604	0.06707868
GGACT	64.39612	0.6848879	0.243674	2.810672	0.004943812	0.06707868
GLT1D1	58.64463	-1.185739	0.4223218	-2.807668	0.004990171	0.06707868
IFI6	1679.52	0.8504151	0.3024041	2.812181	0.004920678	0.06707868
KCNK3	146.7908	-1.329171	0.4731389	-2.809261	0.004965538	0.06707868
MOB3B	545.9993	-0.6641434	0.236473	-2.808538	0.004976699	0.06707868
MRPL28	606.4815	0.4199961	0.1496112	2.807251	0.004996637	0.06707868
OSR2	2262.396	-1.187646	0.4230168	-2.807563	0.004991796	0.06707868
PRDX2	2993.364	0.6403059	0.2276999	2.81206	0.004922524	0.06707868
RRP36	310.5428	0.42894	0.1525164	2.812418	0.004917049	0.06707868
SLC25A25	1201.336	-0.7530013	0.2682367	-2.807227	0.004996995	0.06707868
STK33	302.7976	-0.5894432	0.2098799	-2.808479	0.004977613	0.06707868
AP1M2	957.4594	1.157826	0.4127236	2.80533	0.00502651	0.06709245
CCNE1	155.8683	1.227633	0.4376046	2.805347	0.005026237	0.06709245
CGRRF1	155.8162	-0.4285761	0.1527305	-2.806094	0.005014602	0.06709245
E2F1	146.8536	1.048488	0.3737964	2.804971	0.005032117	0.06709245
MAP2K3	758.9076	0.5991789	0.2135855	2.805336	0.005026423	0.06709245
NRIP2	219.3356	-0.9524496	0.339573	-2.804845	0.005034074	0.06709245
RUNX1T1	307.3755	-1.167941	0.4163796	-2.80499	0.00503181	0.06709245
RUSC2	879.0406	-1.102609	0.3928938	-2.80638	0.00501016	0.06709245
FUT1	61.16725	0.6215793	0.2216347	2.804521	0.00503914	0.06709989
LINC01002	40.67258	0.9564528	0.3412185	2.80305	0.005062175	0.06722763
PPP1R3C	152.0852	-1.068234	0.3810824	-2.803156	0.005060513	0.06722763
PSME3	1328.492	0.5198368	0.1854544	2.803044	0.005062281	0.06722763
CNTFR	75.63	-1.124706	0.4013972	-2.801978	0.005079041	0.06727018
KIF4A	228.6126	1.219002	0.4350485	2.801991	0.005078827	0.06727018
PDE5A	689.5424	-1.063563	0.3795733	-2.801997	0.005078739	0.06727018
TUBG1	472.9182	0.6332432	0.2260751	2.80103	0.005093982	0.06734823
ZSWIM4	305.7524	0.732192	0.2613878	2.801171	0.005091746	0.06734823
EDNRB	244.785	-1.042579	0.3724097	-2.799547	0.005117429	0.0675982
ANKRD40	869.9584	-0.5368225	0.1918024	-2.798831	0.005128792	0.06762828
GPLD1	71.438	-0.9316041	0.3328516	-2.798857	0.005128384	0.06762828
FTH1	18913	0.4766704	0.1703819	2.797659	0.005147439	0.06777826
KCTD1	806.6393	0.6987607	0.2497765	2.797544	0.005149272	0.06777826
FGF14	58.94354	-1.228908	0.4394439	-2.796507	0.005165827	0.06793609
CCNF	171.7162	0.9988104	0.3575199	2.79372	0.005210565	0.06830457
CD9	3913.372	0.5425503	0.1942502	2.793049	0.005221374	0.06830457
FAM214B	238.5887	0.376322	0.1347182	2.793401	0.005215704	0.06830457
MRPL44	329.3444	0.3956985	0.1416565	2.793367	0.005216239	0.06830457
REC8	644.5059	1.077125	0.3855824	2.793501	0.005214093	0.06830457
TRIM23	283.6644	-0.796996	0.2853218	-2.793323	0.005216954	0.06830457
PANK1	191.6594	0.8575314	0.3070684	2.79264	0.005227986	0.06833102
LINC00899	73.86533	-1.047974	0.3753046	-2.79233	0.005232995	0.06833649
ADIRF	601.9092	-1.233068	0.4416478	-2.791972	0.005238797	0.06835229
NPLOC4	1348.403	0.3055378	0.1094516	2.791534	0.005245885	0.06835601
PNPO	509.1876	0.6021239	0.2157078	2.791387	0.005248265	0.06835601
PCDHGA5	47.94761	-1.036412	0.3713947	-2.790595	0.005261118	0.06840373
STRA13	358.7085	0.4941657	0.1770686	2.790815	0.005257546	0.06840373
GSPT2	106.6548	-1.111249	0.3982604	-2.790258	0.005266598	0.06841522
AAGAB	742.9735	0.6710888	0.2406455	2.788703	0.005291956	0.06856514
COG5	751.938	-0.4037219	0.1447604	-2.788897	0.005288793	0.06856514
POLR2L	798.1311	0.3912687	0.1402806	2.789185	0.005284083	0.06856514
AP1B1	1804.325	0.4916025	0.1763319	2.787939	0.005304458	0.06863894
DBN1	2667.23	0.4953917	0.1777004	2.787791	0.005306873	0.06863894
CYP4F11	44.47651	1.048139	0.3761639	2.786388	0.005329904	0.06881724
PLSCR4	413.5419	-1.190683	0.4273144	-2.786434	0.00532915	0.06881724
TJP2	1413.05	0.6176122	0.2216815	2.786034	0.00533572	0.06883264
DNM1P41	62.53155	0.4755746	0.1708455	2.783653	0.005375057	0.06928006
CLSPN	123.6235	1.126391	0.4048065	2.782541	0.005393511	0.06938691
COX6B1	1406.9	0.5399676	0.1940716	2.782311	0.005397329	0.06938691
SLC38A1	1876.997	0.8848653	0.3179902	2.782681	0.005391175	0.06938691
CLIP4	378.3704	-0.8616291	0.3097448	-2.781739	0.005406857	0.06944942
REEP1	201.9547	-1.063188	0.3823001	-2.781029	0.005418687	0.06945943
SDPR	927.9106	-1.29137	0.4643454	-2.781055	0.005418249	0.06945943
TMEM47	1168.482	-0.913885	0.3286348	-2.780853	0.005421634	0.06945943
NLGN1	28.23715	-1.328275	0.4778121	-2.77991	0.005437393	0.06954164
SCN5A	97.38492	-1.040904	0.3744314	-2.77996	0.005436566	0.06954164
ADNP2	492.7814	0.5812733	0.2092107	2.77841	0.005462562	0.06961212
BLM	109.3738	1.158829	0.4170538	2.778608	0.005459231	0.06961212
HPS6	319.6896	0.4109557	0.1478937	2.778723	0.005457306	0.06961212
POLDIP2	1126.542	0.3293936	0.1185458	2.778618	0.005459064	0.06961212
SMG7	1534.368	0.2883536	0.1038023	2.777911	0.00547096	0.06961212
TMEM63B	742.9471	0.5441491	0.1958725	2.778078	0.005468141	0.06961212
GPR155	97.90158	-0.8493543	0.3058039	-2.777448	0.005478767	0.06965192
NOSIP	805.0404	0.4552382	0.1639701	2.77635	0.005497306	0.06982798
MEIS2	799.5806	-1.103094	0.3974594	-2.775363	0.005514021	0.06998058
F2RL1	340.3197	0.9947001	0.3584787	2.774782	0.005523879	0.06998637
ZNF502	91.77359	-1.082409	0.3900723	-2.774893	0.005521988	0.06998637
ABHD17C	343.4586	0.9080068	0.3275573	2.772055	0.005570369	0.07003893
AIMP2	160.2313	0.6438619	0.2321201	2.773831	0.005540048	0.07003893
AXIN1	653.4208	0.4162016	0.1500877	2.773055	0.005553268	0.07003893
DPY19L2P2	94.16139	-0.8458152	0.305007	-2.773101	0.005552487	0.07003893
HAS3	251.7282	1.33771	0.4824967	2.772476	0.005563165	0.07003893
HTR2B	300.5561	-1.229219	0.4433591	-2.772514	0.005562509	0.07003893
LONRF2	1199.822	-1.186979	0.4279586	-2.773584	0.005544257	0.07003893
RAD51	83.43675	1.128903	0.4072117	2.772277	0.005566571	0.07003893
SSC4D	45.3374	1.176297	0.4242497	2.772653	0.005560134	0.07003893
ZNF441	157.7961	-0.5972085	0.2154749	-2.771592	0.005578292	0.07007936
ARHGEF16	297.2191	1.017384	0.3671189	2.771265	0.0055839	0.07009066
SH3BGRL	2420.429	-0.6989351	0.2522745	-2.770534	0.00559645	0.07018901
LDB2	928.7707	-1.091932	0.3942727	-2.769485	0.005614505	0.07035617
IGF2BP3	138.0138	1.318628	0.4763327	2.768291	0.005635106	0.07054015
OTUB1	1197.483	0.4288661	0.1549324	2.768086	0.005638663	0.07054015
ABCC9	1059.206	-0.9509686	0.3436917	-2.766923	0.005658808	0.07059577
MASP1	1555.151	-1.374052	0.4965169	-2.767381	0.005650862	0.07059577
RANGAP1	1432.721	0.5529302	0.1998691	2.766462	0.00566682	0.07059577
SLC35B2	834.8675	0.4680491	0.1691849	2.766495	0.005666253	0.07059577
WIPF3	169.2737	-1.044501	0.3774622	-2.767167	0.005654586	0.07059577
GMIP	406.1549	0.9227531	0.3336733	2.765438	0.005684633	0.07063441
KRIT1	579.4138	-0.3529045	0.1276238	-2.765194	0.005688901	0.07063441
NBPF1	723.0241	-0.7369956	0.2664947	-2.765517	0.005683263	0.07063441
SMIM10	83.44212	-0.9814979	0.3549006	-2.765557	0.00568257	0.07063441
SERP2	42.60219	-0.8591673	0.3107948	-2.76442	0.00570241	0.07068425
SNRPG	549.8212	0.7182502	0.2598029	2.764597	0.005699321	0.07068425
APBA2	424.7264	1.030707	0.3733407	2.760767	0.005766576	0.07074538
CYP4F35P	34.79393	-1.166938	0.4224748	-2.762148	0.005742247	0.07074538
DAAM2	566.1853	-0.9307455	0.3369057	-2.762629	0.005733786	0.07074538
FAM162B	40.02376	-1.088738	0.3941262	-2.76241	0.00573764	0.07074538
FLJ23867	403.9495	0.7774428	0.281586	2.760943	0.005763471	0.07074538
LYPLA2	1226.266	0.8244245	0.2984024	2.762794	0.00573089	0.07074538
MARS	1317.114	0.522884	0.1892055	2.763577	0.005717154	0.07074538
MGC72080	70.41437	0.7428971	0.2689989	2.761711	0.005749933	0.07074538
NUDT14	200.6335	0.5906557	0.2137297	2.763563	0.005717398	0.07074538
PDHX	547.6807	0.5253722	0.1902608	2.761326	0.00575672	0.07074538
PLK3	279.7508	-0.622711	0.225569	-2.760623	0.00576912	0.07074538
TPGS2	1094.945	0.5648447	0.2044704	2.762477	0.005736468	0.07074538
ZNF334	65.6396	-1.165105	0.4219246	-2.761406	0.005755311	0.07074538
NUDT7	62.78091	-0.8667634	0.3140994	-2.759519	0.005788651	0.07086813
TRMT2B	263.807	0.3572773	0.1294647	2.759651	0.005786308	0.07086813
BHLHE41	712.2478	-0.9284823	0.3367276	-2.757369	0.005826851	0.07102549
CYB561D2	193.5195	0.5734612	0.2079506	2.75768	0.005821309	0.07102549
DNASE2	961.7918	0.4428915	0.1606437	2.75698	0.005833786	0.07102549
GNAO1	169.6857	-1.236519	0.4485132	-2.75693	0.00583469	0.07102549
KCNAB1	95.88038	-0.9889498	0.3587505	-2.756651	0.005839672	0.07102549
PRKCZ	255.9149	0.8529896	0.3092863	2.757929	0.00581689	0.07102549
TRPC4	185.7109	-1.184841	0.4295692	-2.758207	0.005811947	0.07102549
ZNF521	321.5905	-1.03168	0.3742509	-2.756653	0.005839625	0.07102549
COMMD9	327.8246	0.5253612	0.1906254	2.755988	0.005851509	0.07111136
MRVI1	1946.171	-1.22808	0.4460116	-2.753471	0.005896703	0.07157683
TTC14	518.7652	-0.6400138	0.2324517	-2.75332	0.005899427	0.07157683
TKT	3634.416	0.779446	0.2832019	2.752263	0.005918505	0.07174982
PDAP1	1780.429	0.3122019	0.1134676	2.751463	0.005932965	0.07186659
B4GALT3	532.7761	0.4597654	0.1671296	2.750952	0.00594223	0.07191376
CEP55	197.7752	1.210371	0.4400204	2.750716	0.00594652	0.07191376
C11orf96	732.3885	-1.246115	0.4530664	-2.750402	0.005952226	0.07192318
MAD2L1BP	221.9594	0.3845145	0.1398163	2.750141	0.005956961	0.07192318
UQCC2	289.4484	0.3556164	0.1293231	2.74983	0.005962617	0.07193313
ERBB2	3057.554	0.69521	0.2528471	2.749528	0.005968116	0.07194117
RAB9B	54.76667	-0.9710971	0.3532258	-2.749224	0.005973647	0.07194958
APBB1	789.8223	-1.01685	0.3700918	-2.74756	0.006004047	0.07197554
ARHGEF25	1004.334	-1.050134	0.3820391	-2.74876	0.00598211	0.07197554
CDNF	25.629	-0.7896089	0.2873235	-2.748153	0.005993205	0.07197554
MRPL20	653.9219	0.3358376	0.122221	2.747789	0.005999855	0.07197554
NCAPG2	349.7884	0.7197308	0.2619844	2.747228	0.006010138	0.07197554
PHC3	1100.828	-0.5405779	0.1967666	-2.747306	0.006008706	0.07197554
PLCL1	96.20213	-1.063712	0.3871574	-2.747492	0.006005297	0.07197554
ZC3H12B	80.75911	-1.03702	0.3775112	-2.746991	0.006014481	0.07197554
CRB3	167.6518	1.027179	0.3741464	2.745392	0.006043864	0.07226908
MDH2	2123.718	0.3670428	0.1337373	2.744506	0.006060211	0.07236338
NDN	734.1497	-1.216447	0.4432411	-2.744437	0.006061472	0.07236338
ARHGAP11A	280.9574	1.043593	0.3806192	2.741829	0.006109807	0.07288196
LIFR	1693.321	-1.171027	0.427145	-2.741521	0.006115546	0.07289202
LINC-PINT	112.7569	-1.007656	0.3675963	-2.741201	0.006121499	0.07290461
DOPEY2	465.8893	0.6096554	0.222469	2.740407	0.006136322	0.07293038
HMOX2	630.8233	0.4249287	0.1550963	2.739773	0.006148158	0.07293038
NAP1L3	149.3286	-1.246386	0.4548695	-2.740095	0.006142135	0.07293038
POP7	242.5044	0.3435441	0.1253839	2.739939	0.00614506	0.07293038
ROBO2	648.3569	1.054061	0.384617	2.740546	0.006133712	0.07293038
LYRM7	312.6925	-0.5182638	0.1891947	-2.739314	0.006156752	0.07297417
GRWD1	628.1834	0.4638464	0.1693972	2.738217	0.006177324	0.07311275
IQGAP3	213.5371	1.131969	0.4134039	2.738167	0.006178266	0.07311275
TTYH3	1795.349	0.8720249	0.3186038	2.737019	0.006199862	0.07331004
ACHE	53.12135	-1.144792	0.4184317	-2.735911	0.006220778	0.07331813
DARS2	371.4144	0.655991	0.2397764	2.735844	0.006222043	0.07331813
FHOD3	219.4643	-0.9956459	0.3639363	-2.735769	0.006223461	0.07331813
HS6ST1	2583.197	0.7521237	0.2749313	2.735679	0.006225171	0.07331813
PNPLA7	305.7395	-1.112557	0.4066783	-2.735718	0.006224426	0.07331813
PCMTD2	1196.299	-0.4220414	0.154309	-2.735042	0.006237237	0.07334419
STON1	320.4003	-1.194426	0.4366786	-2.735251	0.006233266	0.07334419
SSSCA1	211.7114	0.3004975	0.109909	2.734056	0.006255936	0.07350602
ARHGAP27	529.7401	0.580604	0.2124036	2.733494	0.006266629	0.07357358
C11orf31	654.1725	0.4315397	0.1578868	2.733222	0.006271803	0.07357631
APEX2	373.7236	0.6118305	0.2240491	2.730787	0.006318326	0.07359435
ENPEP	450.8293	-1.096533	0.4014451	-2.731464	0.006305363	0.07359435
KIF15	143.4744	1.15133	0.4216865	2.730297	0.00632772	0.07359435
KRAS	694.2333	0.512525	0.1876913	2.73068	0.006320378	0.07359435
MREG	306.11	0.8631447	0.3161302	2.730346	0.006326796	0.07359435
NPHP3	98.75181	-0.8514074	0.3117484	-2.731072	0.00631287	0.07359435
PDE10A	82.45851	-0.8701336	0.3186949	-2.730302	0.006327624	0.07359435
SLC46A1	94.82643	-0.791042	0.2896464	-2.731061	0.006313084	0.07359435
SPG20	1235.816	-0.5328708	0.1950251	-2.73232	0.006289004	0.07359435
STAT5B	2080.159	-0.7372667	0.2698544	-2.732091	0.006293377	0.07359435
TJP3	818.8	1.049149	0.3841652	2.730983	0.006314568	0.07359435
SLC39A1	1862.648	0.3475794	0.1273598	2.729113	0.006350489	0.0738015
PDPN	269.4393	-0.9062101	0.3320873	-2.728831	0.006355921	0.07380701
JADE2	790.3476	-0.8425034	0.3088085	-2.728239	0.006367341	0.073882
HNRNPAB	1937.813	0.5544698	0.2033295	2.726953	0.006392222	0.07411294
PLA2G3	24.27676	1.24042	0.4550031	2.726179	0.006407233	0.07422917
ACP2	629.86	0.5105575	0.1873271	2.725486	0.006420683	0.07432101
HEBP2	494.5034	0.4260319	0.1563306	2.725199	0.006426281	0.07432101
RNF183	210.8914	1.228145	0.4506953	2.725001	0.006430138	0.07432101
TIMM13	689.2036	0.5791075	0.2125605	2.724436	0.006441136	0.07439037
ABHD16A	1016.44	0.335053	0.1230153	2.72367	0.006456093	0.07446618
DDOST	3764.334	0.479873	0.1762435	2.722785	0.006473425	0.07446618
FAM192A	838.6693	0.279991	0.1028298	2.722858	0.006471991	0.07446618
LIX1L	760.0479	-0.9448171	0.3470662	-2.722297	0.006482989	0.07446618
MAPKAPK5	404.5132	0.4814453	0.1767711	2.723552	0.006458406	0.07446618
PSD	1372.264	-1.219013	0.4477552	-2.722499	0.00647902	0.07446618
SHISA5	2306.383	0.2825138	0.1037675	2.722565	0.006477722	0.07446618
TMPRSS2	412.2446	1.045233	0.3840057	2.721919	0.006490395	0.07446618
UQCRC1	1843.549	0.3480654	0.1278805	2.721801	0.006492719	0.07446618
PSRC1	130.2337	0.7967791	0.2929259	2.72007	0.006526803	0.07474193
RYR3	230.1244	-1.214721	0.4465621	-2.720161	0.006525008	0.07474193
HCFC2	320.0202	-0.7911057	0.2908984	-2.719525	0.006537567	0.07480765
CYB561	2100.907	0.7551542	0.2777653	2.718677	0.006554358	0.07482725
DENND2A	542.0725	-0.882001	0.3244071	-2.71881	0.00655173	0.07482725
LOC100129034	1396.178	0.5942198	0.2185463	2.718966	0.00654864	0.07482725
CYFIP1	2706.874	0.3324115	0.1222933	2.718149	0.006564828	0.074832
VPS25	619.0531	0.4460532	0.1640944	2.718271	0.0065624	0.074832
LIPT1	85.94219	-0.51412	0.1891794	-2.717633	0.006575081	0.07489153
POLD1	536.2586	0.6439294	0.2369894	2.717124	0.006585195	0.07494939
BUB1	285.6265	1.21554	0.4477403	2.714833	0.006630916	0.07496742
CDCA4	275.7373	0.5230935	0.1925441	2.716746	0.006592709	0.07496742
ELOVL4	40.37822	-0.8640066	0.3181085	-2.716075	0.00660609	0.07496742
KDM4A	1048.494	0.520896	0.1918745	2.714774	0.006632102	0.07496742
MEF2C	572.3044	-0.9956406	0.3666374	-2.7156	0.006615574	0.07496742
NDUFA13	1536.195	0.5162683	0.1901374	2.715238	0.006622808	0.07496742
NHP2	912.2954	0.3487429	0.1284362	2.7153	0.006621567	0.07496742
RALGAPA1	32.30046	-0.7528328	0.277292	-2.714946	0.006628652	0.07496742
SPTBN2	1051.637	1.096893	0.4038544	2.716062	0.006606361	0.07496742
CNPY2	1334.274	0.6495796	0.2393362	2.714088	0.006645853	0.07500123
CTGF	5377.263	-0.8123707	0.2993292	-2.713971	0.006648206	0.07500123
NUP93	628.8485	0.5749555	0.2118581	2.713871	0.006650207	0.07500123
ARPC5L	368.1784	0.5872508	0.2164685	2.712869	0.00667035	0.0751146
SHB	347.2056	0.6046138	0.2228535	2.713054	0.006666616	0.0751146
EFTUD2	1334.922	0.5782736	0.2132295	2.711978	0.006688309	0.07525991
AGPAT3	1094.576	0.3774543	0.1392198	2.711211	0.006703792	0.07528687
PPFIA3	171.7039	0.5969843	0.2201994	2.711108	0.006705877	0.07528687
TSPAN14	2271.697	0.6405541	0.2362281	2.711592	0.006696105	0.07528687
CCDC134	74.00509	0.6488129	0.2393743	2.710453	0.006719129	0.07532204
LINC01560	72.08125	-0.6634155	0.244761	-2.710463	0.006718937	0.07532204
DFNB59	31.99517	-0.7540173	0.2782216	-2.710132	0.006725639	0.07533829
ZEB1	1330.694	-1.004605	0.3707298	-2.709804	0.006732299	0.07535619
ARMC6	437.3898	0.5666065	0.209145	2.709157	0.006745439	0.07544654
RIPPLY3	44.30407	1.19505	0.4411558	2.708907	0.006750525	0.07544675
ARMCX1	487.3168	-1.007536	0.3719783	-2.708588	0.00675701	0.07546257
AP3D1	2570.56	0.3553458	0.1312251	2.707911	0.006770811	0.07555252
YEATS2	1082.382	0.4381835	0.1618289	2.707696	0.006775214	0.07555252
CFL2	679.0929	-1.102999	0.4075824	-2.7062	0.006805809	0.07580549
LRRTM1	259.2275	1.319588	0.4876367	2.706089	0.006808083	0.07580549
LRRC59	2105.733	0.6908121	0.2553412	2.705447	0.006821257	0.07583873
MPV17L2	177.915	0.7310481	0.2701953	2.705629	0.006817515	0.07583873
PTGES	93.88237	-0.8902891	0.3291381	-2.704911	0.006832271	0.07589367
ROR1	229.1786	-0.8986074	0.3322684	-2.704463	0.006841493	0.07589367
SMARCD1	1051.216	0.5122546	0.1894084	2.704497	0.006840781	0.07589367
TTLL12	1060.128	0.6193256	0.2291185	2.70308	0.006870012	0.07615329
SLC6A6	1679.208	0.5656252	0.2092775	2.702752	0.00687681	0.07617192
IMMT	1068.763	0.4183884	0.1548319	2.702211	0.006888014	0.0762393
SOWAHB	78.68539	1.017565	0.3766357	2.701721	0.006898159	0.07629487
WARS	2449.517	0.6457525	0.23908	2.700989	0.006913356	0.07640618
E2F8	80.9579	1.215381	0.4501081	2.700199	0.006929803	0.07653114
NXPE3	336.4592	-0.8444716	0.3128402	-2.69937	0.00694709	0.07666518
GET4	515.8825	0.4060228	0.150524	2.697395	0.00698843	0.07666673
GRIP1	228.1148	0.8448859	0.3131852	2.69772	0.006981612	0.07666673
HEPH	716.6413	-0.7018169	0.2600451	-2.698828	0.006958421	0.07666673
HSPB6	1292.505	-1.307395	0.4846804	-2.697436	0.006987563	0.07666673
MCM5	775.6687	0.4857309	0.1800297	2.69806	0.006974494	0.07666673
PKD2	1427.039	-0.8674635	0.3214782	-2.698359	0.006968223	0.07666673
USP18	248.1966	0.753005	0.2790535	2.698425	0.006966834	0.07666673
WT1	855.5071	-1.189684	0.4409997	-2.697698	0.006982082	0.07666673
AP1S3	123.8222	1.071886	0.3974339	2.697017	0.006996369	0.07669731
JARID2	524.9502	0.4304645	0.1596779	2.69583	0.007021346	0.07676429
LMTK2	575.3098	0.3247933	0.1204562	2.69636	0.00701019	0.07676429
MCM4	1003.733	0.8708904	0.3230609	2.695747	0.007023105	0.07676429
TMEM63A	1535.976	0.3470037	0.1287213	2.695776	0.007022478	0.07676429
AGRN	5082.802	0.9147053	0.3394182	2.694921	0.00704053	0.0768148
CEP126	258.2848	-0.9193203	0.3411385	-2.694859	0.00704184	0.0768148
KIAA1671	1345.54	0.439873	0.1632306	2.694794	0.007043206	0.0768148
FHL1	2674.65	-1.294874	0.4808334	-2.692979	0.007081675	0.07706498
TLE6	47.0435	0.8161407	0.3030122	2.693425	0.007072208	0.07706498
TOP1	1604.128	0.5004627	0.1858354	2.693042	0.007080328	0.07706498
ANO5	82.35337	-1.021558	0.3797216	-2.690282	0.007139169	0.0770788
C2CD4A	170.8184	1.175522	0.4373005	2.688133	0.007185274	0.0770788
CPT2	379.7909	0.4827207	0.1795327	2.688763	0.007171737	0.0770788
DIP2B	876.706	0.4729462	0.1759485	2.68798	0.00718856	0.0770788
DIRAS1	187.8771	-1.226811	0.4557978	-2.69157	0.007111667	0.0770788
GTF3C2	872.4329	0.4653659	0.1729847	2.690214	0.007140631	0.0770788
ITGB6	391.0518	1.232528	0.4584964	2.688196	0.007183925	0.0770788
LOC644285	35.12756	-1.051521	0.3906529	-2.691701	0.007108856	0.0770788
MXRA8	2002.962	-1.125329	0.4183508	-2.689917	0.007146982	0.0770788
ORC1	84.63653	1.129883	0.4201716	2.689099	0.007164526	0.0770788
P4HB	10067.86	0.6555646	0.2439005	2.687836	0.007191674	0.0770788
PAK3	40.49825	-1.257467	0.4672103	-2.691436	0.007114513	0.0770788
PAMR1	1884.44	-1.026197	0.381204	-2.691988	0.007102746	0.0770788
PRRX1	1644.952	-0.8994046	0.3342806	-2.690568	0.007133059	0.0770788
PSMB4	2403.434	0.415057	0.1543458	2.689136	0.007163716	0.0770788
SBSPON	312.5145	0.8306484	0.3089436	2.688674	0.007173649	0.0770788
SEMA3F	633.5092	0.5971984	0.2220818	2.689091	0.007164682	0.0770788
SKIV2L	838.9435	0.3122783	0.116164	2.688253	0.00718269	0.0770788
SOX6	288.6743	0.9993876	0.3712782	2.691749	0.007107848	0.0770788
VAMP8	701.4187	0.8530332	0.3172968	2.688439	0.007178692	0.0770788
YIF1B	456.7077	0.605661	0.2252854	2.688417	0.007179168	0.0770788
LRRC8E	186.3944	1.049777	0.3906074	2.687551	0.00719781	0.07708906
SOCS6	571.5734	-0.4703385	0.1750844	-2.686354	0.007223658	0.07731028
MTG1	396.8119	0.5250557	0.1954813	2.685964	0.007232091	0.07734493
YPEL4	62.91783	-1.103686	0.4110791	-2.684851	0.007256213	0.07754719
FEM1B	1245.83	-0.5400182	0.2012164	-2.683769	0.007279745	0.07772267
HILPDA	432.1704	0.8300836	0.3093416	2.683388	0.007288035	0.07772267
PMF1	143.2013	0.3978165	0.1482522	2.683376	0.007288295	0.07772267
FXYD5	531.5226	-0.7156721	0.2667729	-2.682702	0.007303003	0.07782377
CWF19L2	345.0269	-0.4308792	0.1606708	-2.681753	0.007323762	0.07786517
MFSD9	178.3454	0.5931483	0.2211398	2.682232	0.007313263	0.07786517
MLH3	384.4746	-0.3782359	0.1410258	-2.682032	0.007317641	0.07786517
SLC51A	36.93126	1.028976	0.3837218	2.681568	0.00732781	0.07786517
B3GALT5-AS1	37.52522	-0.9000983	0.3357481	-2.680874	0.007343024	0.07797118
FANCA	183.4352	1.003965	0.374644	2.679783	0.00736699	0.07816991
ANP32A	1884.689	0.483343	0.1803904	2.679428	0.007374807	0.07819712
TMEM125	239.7182	0.9418134	0.3515438	2.679079	0.007382505	0.07821041
TSPYL5	422.5491	-1.156459	0.4316927	-2.678894	0.007386568	0.07821041
ADCK5	195.3513	0.4099138	0.1530297	2.678656	0.007391835	0.07821055
DNAL4	531.1825	0.4871229	0.1818908	2.678107	0.007403958	0.07828318
SOX15	50.22057	-1.091645	0.4076963	-2.677595	0.007415292	0.07834737
ADAMTS5	642.7909	-1.053025	0.3938631	-2.673581	0.007504618	0.07845593
CACNA2D2	87.6996	-1.084984	0.4054944	-2.675706	0.007457197	0.07845593
DPY19L2	145.7113	-0.878395	0.3285028	-2.673934	0.007496718	0.07845593
ECHS1	1724.144	0.6116453	0.2285964	2.675656	0.007458306	0.07845593
FGF19	79.82239	-1.334269	0.4986039	-2.67601	0.00745044	0.07845593
HEBP1	341.7134	-0.5856712	0.2188544	-2.676077	0.00744896	0.07845593
LOC100507557	46.5676	-0.7945418	0.2970824	-2.674483	0.007484466	0.07845593
LOC389641	43.32719	0.8960376	0.3351326	2.673681	0.007502387	0.07845593
NECAB1	54.0199	-1.265	0.4730336	-2.674227	0.007490164	0.07845593
PREPL	1121.781	-0.3260503	0.1219412	-2.673833	0.007498985	0.07845593
RBM43	302.1446	-0.6844326	0.2559515	-2.674071	0.007493653	0.07845593
SETBP1	680.789	-0.8488217	0.3171319	-2.676558	0.007438279	0.07845593
STMN1	2043.553	0.7778118	0.2908017	2.674716	0.007479264	0.07845593
TEF	799.0857	-0.8834879	0.3304164	-2.673862	0.007498325	0.07845593
ZC3H6	292.4739	-0.6950242	0.2599384	-2.673803	0.00749964	0.07845593
BLOC1S6	870.71	-0.3160735	0.118235	-2.673265	0.007511681	0.07847466
ABCB1	433.6913	-0.9083907	0.3399228	-2.672344	0.007532337	0.07858016
AIM1L	48.48148	1.261076	0.47187	2.672507	0.007528671	0.07858016
TRAPPC3	578.0959	0.2503049	0.09370342	2.671246	0.00755702	0.07872733
TROAP	194.2037	1.211985	0.4537097	2.671278	0.007556308	0.07872733
TPM3	3862.581	0.686827	0.2572559	2.669821	0.007589175	0.07900702
TECPR1	567.0835	0.2826226	0.1059073	2.668584	0.007617172	0.07924307
ASF1B	260.3369	1.208101	0.4528604	2.667711	0.00763699	0.07926381
ESPL1	196.7567	1.160287	0.4349311	2.667749	0.007636117	0.07926381
HYOU1	4594.728	0.7149083	0.268001	2.667558	0.007640462	0.07926381
PTGER2	157.5473	-0.983693	0.3687273	-2.667806	0.007634827	0.07926381
MTFP1	271.3754	0.9990756	0.3745764	2.667214	0.00764829	0.07928976
BZRAP1	1017.889	-0.7883694	0.2958261	-2.664976	0.007699392	0.07943233
CDC42EP5	101.1043	-0.9735252	0.3651695	-2.665954	0.007677018	0.07943233
MOV10	1020.424	0.2868428	0.1075794	2.666335	0.007668313	0.07943233
MRPL12	411.221	0.5042111	0.1891682	2.665412	0.007689415	0.07943233
PKD1L2	58.71501	-1.099863	0.4126728	-2.665218	0.007693838	0.07943233
SMIM22	239.8206	0.8909944	0.3343139	2.665143	0.007695565	0.07943233
ZNF559	226.9848	-0.6543766	0.2455152	-2.665321	0.007691497	0.07943233
YARS	919.3021	0.5575168	0.2092545	2.6643	0.007714864	0.07953683
KIAA0101	254.9527	1.194474	0.4484604	2.6635	0.007733236	0.07956094
PPP5C	972.1901	0.3714632	0.1394445	2.663878	0.007724557	0.07956094
SFRP1	3530.106	-1.203768	0.4519204	-2.663672	0.007729289	0.07956094
GARS	921.2024	0.4526973	0.1699951	2.663002	0.007744701	0.07959267
SLC8A1	968.0428	-1.008203	0.3786109	-2.662901	0.007747013	0.07959267
DNAJC27	142.8744	-0.6686823	0.2511709	-2.66226	0.007761788	0.07968947
ARHGAP6	263.9729	-1.26969	0.4771442	-2.661019	0.007790458	0.07987919
CHMP1B	1156.185	0.3639812	0.1367987	2.660706	0.007797703	0.07987919
DYNC1H1	6339.995	0.3841814	0.1444128	2.660301	0.007807095	0.07987919
MAOB	1729.612	-1.140767	0.4287717	-2.660546	0.007801407	0.07987919
SLC27A4	409.4016	0.4773252	0.1794138	2.66047	0.007803159	0.07987919
COX7A1	129.9591	-1.039226	0.3907447	-2.659605	0.00782324	0.0799894
SLC35A4	1252.474	0.3610816	0.1357975	2.65897	0.007837994	0.08003032
USP5	1496.065	0.4691451	0.1764336	2.659046	0.007836226	0.08003032
QKI	1484.248	-0.4798477	0.1805256	-2.658059	0.007859219	0.08019205
CNKSR2	33.74814	-1.07805	0.4057455	-2.65696	0.007884884	0.08033321
TTK	121.3949	1.191585	0.448442	2.657168	0.007880027	0.08033321
ZNF280D	631.8099	-0.6106092	0.2298311	-2.656774	0.007889243	0.08033321
CAPRIN2	305.4557	-0.4251094	0.1600871	-2.655487	0.007919391	0.08048358
CDC25A	79.52301	1.082809	0.4077407	2.655632	0.007915989	0.08048358
FAM178A	885.6833	-0.4491045	0.1691807	-2.654584	0.007940622	0.08048358
GINS1	191.184	1.025718	0.3863285	2.65504	0.007929899	0.08048358
RTKN2	150.0527	1.060626	0.399525	2.654717	0.007937488	0.08048358
SPATS2	712.1645	0.7337793	0.2763441	2.65531	0.007923549	0.08048358
ZFP2	58.64151	-0.8189668	0.3085165	-2.654532	0.007941854	0.08048358
GALNT14	96.48491	1.296361	0.4884859	2.653835	0.007958284	0.08048571
UBAP2L	2500.883	0.2569359	0.09680714	2.654101	0.007952011	0.08048571
WNT11	148.5932	1.156872	0.43591	2.653924	0.007956174	0.08048571
N4BP2L1	227.3314	-0.9225271	0.3477054	-2.653186	0.007973592	0.08058579
ARID4A	454.8318	-0.429742	0.1620343	-2.652167	0.007997695	0.08077455
CTSV	1551.962	1.099827	0.4151215	2.64941	0.008063239	0.08088776
CYR61	4799.84	-1.13484	0.4281063	-2.650836	0.008029284	0.08088776
GCAT	150.242	0.5963877	0.2250134	2.650454	0.008038359	0.08088776
HAAO	180.9217	-1.041911	0.3930228	-2.65102	0.008024907	0.08088776
KBTBD3	90.42481	-0.5005218	0.1888564	-2.650277	0.008042578	0.08088776
RAB8A	956.7061	0.3953803	0.1491895	2.650188	0.008044693	0.08088776
TNFAIP1	815.5252	0.4282847	0.1616303	2.64978	0.008054419	0.08088776
TNNT1	97.76964	1.291025	0.4871142	2.650354	0.008040759	0.08088776
ZCCHC24	1218.092	-1.042916	0.3936334	-2.649461	0.008062036	0.08088776
ZNF672	494.9461	0.4671595	0.1762841	2.650038	0.00804826	0.08088776
KIF11	375.227	1.127613	0.4257002	2.648842	0.008076807	0.08091482
WHAMMP1	97.24362	-0.5049818	0.1906361	-2.648931	0.008074678	0.08091482
EZH1	1011.468	-0.8415617	0.3179626	-2.646732	0.008127373	0.08131197
GSTP1	5901.709	0.6366279	0.2405136	2.646951	0.008122105	0.08131197
B4GALT5	1873.885	0.5465685	0.206551	2.646168	0.008140944	0.08139304
E2F5	133.8656	0.7810904	0.2952307	2.645695	0.00815233	0.08145218
UNG	543.6064	0.544137	0.2057484	2.644672	0.008177007	0.08158921
ZNF658	59.74908	-0.7367691	0.2785775	-2.644755	0.008175015	0.08158921
MAP2K6	510.2646	1.05026	0.3971732	2.644337	0.008185103	0.08161529
ZDHHC13	334.1127	0.6808335	0.2574969	2.644046	0.008192157	0.08163095
HBEGF	176.2483	-0.8396338	0.3177999	-2.64202	0.008241308	0.08196416
MAD2L2	302.1586	0.5787707	0.2190501	2.642184	0.008237321	0.08196416
SLC16A14	173.9904	-0.6457443	0.2444161	-2.641987	0.008242114	0.08196416
URM1	855.1205	0.3793976	0.1436233	2.641617	0.008251139	0.08199913
HIP1R	1014.451	0.752968	0.2850819	2.641234	0.008260457	0.08203697
FADS2	2535.721	0.6590699	0.2495787	2.64073	0.00827276	0.08210439
SEMA4A	388.1985	0.6723431	0.2546315	2.640455	0.008279478	0.08211632
EPHB6	322.9395	-1.157315	0.4385397	-2.639019	0.00831464	0.08241015
CXCL10	496.437	1.101482	0.4174748	2.63844	0.008328838	0.08249595
PGAM1	3781.26	0.5338372	0.2023838	2.637747	0.00834588	0.08260979
WDR55	392.9112	0.4203064	0.1593749	2.637219	0.008358875	0.08268344
C17orf51	253.2391	-0.8922292	0.3385536	-2.635415	0.00840345	0.08277058
KLF11	562.8199	-0.8041988	0.3051655	-2.635288	0.008406605	0.08277058
LPAR1	401.4726	-0.6092526	0.2311057	-2.636251	0.008382768	0.08277058
MCRS1	960.0499	0.4789679	0.1816638	2.636563	0.008375071	0.08277058
SHKBP1	761.06	0.461742	0.1751874	2.635704	0.008396297	0.08277058
TONSL	256.5457	0.865008	0.3281763	2.635803	0.008393849	0.08277058
UTRN	2743.294	-0.6069479	0.2302776	-2.635723	0.008395822	0.08277058
CCDC136	62.2593	-1.1467	0.4351826	-2.634987	0.008414051	0.08278915
MAZ	2014.494	0.342812	0.1301469	2.634038	0.0084376	0.08296602
NUDT10	69.74236	-1.205893	0.4578622	-2.633745	0.008444882	0.08297755
PID1	232.9092	-1.254814	0.4764737	-2.633543	0.008449921	0.08297755
CES1	510.0787	-1.233783	0.4686818	-2.632454	0.00847706	0.08312266
CLPB	238.965	0.4378764	0.1663539	2.632198	0.008483435	0.08312266
FBXL6	209.9449	0.5233941	0.1989109	2.6313	0.008505892	0.08312266
MTMR9	282.5034	-0.4145064	0.1575374	-2.631161	0.008509366	0.08312266
PRDX1	3443.392	0.5331415	0.2026075	2.6314	0.008503382	0.08312266
SARDH	80.16459	-0.9165432	0.3481981	-2.632246	0.008482235	0.08312266
TSPAN2	568.6304	-1.237313	0.4702211	-2.631344	0.008504802	0.08312266
ZKSCAN8	829.5964	-0.3964494	0.1506638	-2.631351	0.008504614	0.08312266
GRB2	1737.617	0.1997143	0.07591283	2.630837	0.008517493	0.08314749
AFF2	212.5315	1.070279	0.4069595	2.62994	0.008539994	0.08316688
FBXL3	841.8629	-0.6104483	0.2321214	-2.629867	0.008541825	0.08316688
LCAT	153.9485	-0.7424012	0.2822273	-2.630508	0.008525736	0.08316688
YBX1	8103.422	0.437781	0.1664504	2.630099	0.008535992	0.08316688
CHAF1A	357.0234	0.8339995	0.3172098	2.629173	0.008559269	0.08328225
ABI2	1410.269	-0.4040307	0.1536968	-2.628751	0.008569902	0.08333124
AUP1	1235.91	0.279309	0.1062701	2.628294	0.008581423	0.0833888
ADCY9	454.8705	-1.057587	0.4024245	-2.628038	0.008587895	0.08339726
LNP1	55.74581	-0.8173015	0.3111353	-2.626836	0.008618275	0.08363772
CHD1L	613.0971	0.3849954	0.1466954	2.624455	0.008678786	0.08388053
GPR135	34.23871	-1.042201	0.3969693	-2.625394	0.008654875	0.08388053
LMO2	387.8533	-0.3989527	0.1519955	-2.624767	0.008670825	0.08388053
NFKBIB	265.1756	0.5237448	0.1995133	2.625113	0.008662025	0.08388053
ORC6	144.5375	1.090148	0.4153325	2.62476	0.008671012	0.08388053
PTPN3	762.6982	0.9318502	0.3550445	2.624601	0.008675055	0.08388053
ROMO1	520.2999	0.5389564	0.2053715	2.6243	0.008682736	0.08388053
KIF14	115.2176	1.175988	0.4482781	2.623345	0.008707096	0.08395242
LOC389765	70.59759	-0.5668337	0.2160413	-2.623728	0.008697319	0.08395242
MAN1C1	415.5799	-0.9605645	0.3661473	-2.623437	0.008704751	0.08395242
SOX4	4472.529	0.7304413	0.2784917	2.622848	0.008719823	0.08402072
SPIN1	2963.644	-0.3159286	0.1204645	-2.622586	0.008726522	0.08403087
PCDHB4	152.9079	-1.07893	0.4116139	-2.621219	0.008761608	0.08431419
NPR2	557.7998	-0.9869584	0.3766619	-2.620277	0.008785846	0.08449282
PLEKHG2	977.7743	0.4695424	0.1792196	2.619928	0.008794845	0.08452476
USB1	537.0571	0.5011973	0.1913241	2.619624	0.008802675	0.08454543
LGI4	193.1365	-1.223503	0.4671104	-2.619301	0.008811007	0.0845709
CYP1B1	1327.155	-1.010462	0.3858299	-2.61893	0.008820595	0.08459548
NXPH3	411.3847	-1.164225	0.4445705	-2.618763	0.008824933	0.08459548
EXT2	1354.019	-0.3574833	0.136536	-2.618234	0.008838618	0.08467214
BHMT2	193.6039	-1.129961	0.4316817	-2.61758	0.008855579	0.08468078
DDX41	891.8523	0.3281044	0.1253483	2.617541	0.008856584	0.08468078
IGF2BP2	360.473	0.9077907	0.3467981	2.617634	0.008854162	0.08468078
CDC42SE1	1442.042	0.4294162	0.1641303	2.616313	0.008888494	0.08485498
COL27A1	1944.695	-0.9619772	0.3678096	-2.615422	0.008911731	0.08485498
IKZF4	221.4069	-0.3594863	0.1374661	-2.61509	0.008920404	0.08485498
KLHDC2	722.6485	-0.4364221	0.166877	-2.615232	0.008916697	0.08485498
MMP10	150.3839	1.280188	0.4893374	2.616166	0.008892342	0.08485498
TMPRSS13	321.1026	1.213364	0.4639348	2.615375	0.008912947	0.08485498
TSPAN7	623.9889	-1.11073	0.4246106	-2.615878	0.008899827	0.08485498
TUBE1	257.8664	-0.6811217	0.2603737	-2.615938	0.008898261	0.08485498
NUP62	1330.612	0.3317545	0.1268972	2.614357	0.008939566	0.08487456
PPP1R14C	175.7764	1.095488	0.418962	2.614768	0.008928811	0.08487456
RPS26	3953.763	0.5080579	0.1943306	2.6144	0.008938442	0.08487456
CDKN3	58.73636	1.061462	0.4061779	2.613292	0.008967462	0.08488182
LINC00476	193.7458	-0.5840612	0.2235149	-2.613075	0.008973163	0.08488182
MFHAS1	697.7232	0.6863794	0.2626455	2.613331	0.008966452	0.08488182
MFI2-AS1	30.46427	-0.8546846	0.3270525	-2.613295	0.008967394	0.08488182
NRG2	72.85751	-1.156117	0.4424811	-2.612805	0.008980242	0.08488182
S100A10	884.7632	0.6609548	0.2528481	2.614039	0.008947872	0.08488182
TUBA3E	28.16658	-1.278383	0.4892512	-2.612938	0.008976763	0.08488182
B3GNT3	140.7789	1.177435	0.4507353	2.612255	0.008994713	0.08496465
HSD17B14	182.5401	-0.971722	0.3720759	-2.611623	0.009011353	0.08502135
TMEM243	173.377	-0.4125945	0.1579857	-2.611593	0.009012137	0.08502135
CCDC64B	208.8585	0.9730523	0.3726804	2.610957	0.009028929	0.08509386
F11R	2763.522	0.8594655	0.3291876	2.610869	0.009031255	0.08509386
PGM5	3026.365	-1.26621	0.4850248	-2.610608	0.009038133	0.0851048
CABIN1	1913.079	0.3805468	0.1457994	2.61007	0.009052364	0.08513111
RELT	146.6945	0.850245	0.3257512	2.610105	0.009051436	0.08513111
TRPM4	1323.485	0.8962937	0.3434416	2.609741	0.009061066	0.08515915
C2orf15	80.20823	0.9226148	0.353587	2.609301	0.009072737	0.08521504
GALE	490.5575	0.8915128	0.3417092	2.608981	0.009081223	0.08524096
FAM131B	126.2353	-1.056506	0.4050646	-2.60824	0.009100905	0.08532718
PRDM1	678.444	-0.7527198	0.288597	-2.608204	0.009101871	0.08532718
BIVM	165.3733	-0.4302343	0.1650454	-2.606763	0.009140248	0.08541439
C14orf80	153.6366	0.8240007	0.3161689	2.606204	0.009155193	0.08541439
FLJ10038	166.573	-0.7284321	0.2793523	-2.607575	0.009118608	0.08541439
LEO1	388.0783	0.4857588	0.186303	2.607359	0.009124369	0.08541439
LYRM9	175.7989	-0.7721035	0.296217	-2.606547	0.009146029	0.08541439
MED18	190.2597	0.3527475	0.1353322	2.60653	0.009146481	0.08541439
PIP5K1A	932.9578	0.2180612	0.08367229	2.606134	0.009157074	0.08541439
ZBTB38	1807.089	-0.6659823	0.2554871	-2.606716	0.009141507	0.08541439
ZEB1-AS1	80.32181	-0.676893	0.2598563	-2.604875	0.009190788	0.08567518
LOC100130992	56.01527	-1.184059	0.4546041	-2.604594	0.009198308	0.08569162
MANF	1069.975	0.5607824	0.215327	2.604329	0.009205433	0.08570437
NOVA1	91.57358	-1.167571	0.4485362	-2.603069	0.009239346	0.08596437
ZBTB42	190.165	0.6170122	0.2370514	2.602862	0.009244909	0.08596437
AOC3	934.4749	-1.125723	0.432593	-2.602269	0.009260917	0.08600634
ARID3B	167.2251	0.5864877	0.2253757	2.602267	0.009260977	0.08600634
PRPF4	615.574	0.4891929	0.1880061	2.602005	0.00926804	0.08601827
AKR1B10	35.76843	1.239429	0.476517	2.601017	0.009294783	0.08610543
C14orf132	1091.192	-0.9849563	0.3786303	-2.601367	0.009285312	0.08610543
ZSCAN16	55.42826	0.6142618	0.2361521	2.601128	0.009291787	0.08610543
SAC3D1	88.92649	0.4997345	0.19226	2.599264	0.009342398	0.08643896
XYLT1	312.7731	-1.053032	0.4051033	-2.599416	0.009338257	0.08643896
PSMD9	561.5755	0.4336329	0.1668898	2.598319	0.009368133	0.08662323
CD276	1687.939	0.6072975	0.2338055	2.597447	0.009391953	0.08668197
FANCI	430.5602	0.9363683	0.3604929	2.597467	0.009391416	0.08668197
PRDM8	153.5092	-1.181378	0.4547778	-2.597703	0.00938495	0.08668197
RIMKLA	78.12552	1.207573	0.4649954	2.596957	0.00940537	0.08675201
SLC35G1	38.25584	0.9670133	0.3724052	2.59667	0.009413241	0.08677085
CKAP4	2236.568	0.4221238	0.1626213	2.595747	0.009438544	0.08695025
SERF2	647.1423	0.347064	0.1337166	2.59552	0.009444796	0.08695404
APH1A	2508.673	0.3860274	0.1487445	2.595238	0.009452537	0.08697152
ARHGEF5	217.0841	0.6008568	0.2316069	2.594295	0.0094785	0.087049
NUP210	1030.429	0.9182092	0.3539046	2.59451	0.009472583	0.087049
PWAR5	59.1589	-0.6187109	0.2384702	-2.5945	0.009472853	0.087049
ADAMTSL1	671.2553	-1.002934	0.3866363	-2.593999	0.009486688	0.08707049
HOXA11	1353.985	-0.959218	0.3699353	-2.592934	0.009516094	0.08728656
IFRD2	516.2153	0.2890174	0.1114756	2.592653	0.009523887	0.08730426
CIR1	563.7498	-0.3769575	0.1454101	-2.592374	0.009531597	0.08732116
KLHL18	381.5353	0.376771	0.145365	2.591896	0.009544863	0.08738891
ATP6V1B1	172.3553	1.106313	0.4270982	2.590301	0.009589192	0.0875805
DOT1L	499.034	0.4315143	0.1666023	2.590086	0.009595204	0.0875805
KGFLP2	62.11252	-0.8030238	0.3099414	-2.590889	0.009572826	0.0875805
MMP19	256.8652	-0.9075777	0.3503249	-2.590675	0.009578804	0.0875805
N4BP2L2	1027.436	-0.5145413	0.1986436	-2.590274	0.009589963	0.0875805
DSTYK	625.7055	-0.5381195	0.2078529	-2.588944	0.00962707	0.08781752
GREM1	262.6426	-1.241673	0.4797145	-2.588359	0.009643444	0.08785921
LSM7	449.7927	0.5534122	0.2138069	2.588373	0.009643045	0.08785921
GIMAP4	486.0048	-0.715333	0.2764485	-2.587581	0.009665238	0.08795012
PPAT	268.7755	0.5085272	0.1965236	2.587614	0.009664319	0.08795012
EMP3	499.6404	-0.9141709	0.3533776	-2.586952	0.00968292	0.08800344
RASSF8	886.8654	-1.044202	0.4036208	-2.587088	0.009679091	0.08800344
ADAM11	106.402	-1.137552	0.4401877	-2.584243	0.009759312	0.0882117
BRIP1	103.8267	0.9906442	0.3833272	2.584331	0.009756824	0.0882117
C2orf47	171.8936	0.4303082	0.1664307	2.58551	0.009723508	0.0882117
CBLN4	29.39525	-1.193332	0.4615854	-2.585289	0.00972974	0.0882117
GULP1	590.8432	-0.5341107	0.2066596	-2.584495	0.009752165	0.0882117
KANK2	6482.561	-1.040719	0.4026932	-2.584397	0.009754936	0.0882117
PTGDR	24.53488	-1.067	0.4129197	-2.584039	0.009765089	0.0882117
THAP2	94.52134	-0.7377221	0.2854771	-2.584172	0.009761299	0.0882117
TTF2	328.9386	0.6733568	0.260393	2.585925	0.009711809	0.0882117
WDR18	409.2788	0.5138222	0.1987775	2.584912	0.009740397	0.0882117
NAA38	296.7126	0.3759223	0.1454944	2.583758	0.009773038	0.08822997
HVCN1	139.6292	-0.810627	0.3137663	-2.583537	0.009779284	0.08823285
NETO2	157.6916	1.109617	0.4295486	2.583216	0.009788412	0.08826172
SMARCC1	2616.721	0.5811177	0.2249879	2.582884	0.009797837	0.08829322
DGKH	701.6945	-0.4465787	0.1729368	-2.582322	0.009813788	0.08833003
SORD	1622.896	0.7792346	0.3017509	2.582377	0.009812225	0.08833003
AACS	631.8062	0.6751478	0.2615544	2.58129	0.009843183	0.0884871
SRL	63.89619	-1.215144	0.4707411	-2.581341	0.009841723	0.0884871
ZNF630	47.06483	-0.5483548	0.2124514	-2.581084	0.009849071	0.0884871
CDADC1	164.9954	-0.3904842	0.1513586	-2.579861	0.009883997	0.08869383
PSMB3	821.6505	0.5319836	0.2061982	2.579962	0.009881119	0.08869383
NOP2	596.7613	0.6061583	0.2349811	2.579605	0.009891344	0.08870629
BAX	813.0354	0.6842166	0.2653123	2.57891	0.009911247	0.08883127
KLK10	459.2279	0.7345437	0.2849668	2.577647	0.009947567	0.08904957
SRPK1	944.4496	0.5718134	0.221825	2.577768	0.009944087	0.08904957
NR2F1	599.8188	-0.9654862	0.3746287	-2.577182	0.009960953	0.08906229
RCAN3	415.3321	0.8343016	0.3237127	2.57729	0.009957824	0.08906229
C1orf95	146.4603	-0.9426617	0.3659974	-2.575597	0.01000673	0.08920372
REPIN1	1594.656	0.3900314	0.1514256	2.57573	0.01000288	0.08920372
SIAH2	690.8231	-0.4711754	0.1829168	-2.5759	0.009997964	0.08920372
TBCB	707.788	0.4062678	0.1576873	2.576413	0.009983125	0.08920372
THRA	947.2067	-0.8119808	0.3151872	-2.576186	0.009989703	0.08920372
DTWD1	393.0629	-0.6130371	0.2380822	-2.574897	0.01002699	0.08922405
GABPA	686.0789	-0.3922645	0.1523316	-2.57507	0.01002197	0.08922405
SHMT2	1366.822	0.7547379	0.2931115	2.574917	0.01002641	0.08922405
PES1	1254.49	0.3159718	0.1227334	2.574457	0.01003976	0.08925005
WHAMMP2	58.12002	-1.062449	0.4127006	-2.574383	0.0100419	0.08925005
AIFM1	1351.259	0.6786293	0.2636533	2.573946	0.0100546	0.08930954
AHCY	3292.167	0.6287895	0.2443267	2.573561	0.0100658	0.08935574
S100A11	3283.059	0.7946011	0.308809	2.573115	0.01007876	0.08941747
PIGO	626.3507	0.4027706	0.1565481	2.572822	0.01008729	0.08943987
GLIPR1	488.8082	-0.852933	0.3315517	-2.572549	0.01009525	0.08945718
DENND4A	452.5859	-0.382143	0.1485865	-2.571855	0.01011552	0.08956803
KLF5	943.1041	0.9403632	0.365657	2.571709	0.0101198	0.08956803
KLHL25	234.882	0.5815861	0.2262886	2.570108	0.01016669	0.08992957
ITFG3	1696.113	0.5260921	0.2047326	2.569655	0.01017999	0.08999327
OAS3	1227.329	0.7559076	0.2942363	2.56905	0.01019778	0.08999327
SNRPB	1612.008	0.4651045	0.1810421	2.56904	0.01019807	0.08999327
ZCCHC12	937.5511	-1.242189	0.4835194	-2.569057	0.01019757	0.08999327
PLK5	36.84194	-1.3271	0.516619	-2.568818	0.01020459	0.08999747
GSS	603.4718	0.4265681	0.166081	2.568434	0.01021592	0.09004401
OGN	969.1375	-1.307583	0.5091925	-2.567953	0.01023009	0.09011561
RNPEPL1	695.4178	0.3835042	0.1493693	2.56749	0.01024377	0.09018277
SAMD1	381.901	0.387776	0.1510628	2.566986	0.01025868	0.09026062
R3HDM1	520.9468	0.4396507	0.1713013	2.566535	0.01027203	0.09027659
SEMA6C	267.924	-0.9983505	0.3889908	-2.566515	0.01027262	0.09027659
CCT3	3786.697	0.5044214	0.1965752	2.566048	0.01028645	0.09034476
PDLIM1	2465.419	0.6673922	0.2601339	2.565571	0.0103006	0.0904157
AKR1A1	1476.78	0.4842735	0.1887977	2.565039	0.01031643	0.09050125
DIAPH3	121.0913	1.110548	0.4330294	2.564602	0.01032941	0.09050852
GYPC	360.7187	-0.9334907	0.3639617	-2.564805	0.01032339	0.09050852
LMAN2	2461.959	0.4387499	0.1711134	2.564089	0.0103447	0.09058911
ARHGAP20	147.1454	-1.150174	0.448946	-2.561944	0.01040882	0.09084644
CKS2	418.4337	1.019935	0.398151	2.561678	0.0104168	0.09084644
DET1	170.2618	-0.7814994	0.3050545	-2.561835	0.01041208	0.09084644
DNMT3A	860.7721	0.6021452	0.2350547	2.561723	0.01041542	0.09084644
GALNT10	1800.219	0.883086	0.3446996	2.5619	0.01041012	0.09084644
GRHL3	26.94659	0.9521871	0.3716129	2.562309	0.01039788	0.09084644
MAGI2	108.6787	-1.00109	0.3907425	-2.562021	0.01040651	0.09084644
MEF2A	1270.879	-0.667898	0.2607879	-2.561078	0.01043481	0.09095021
NCAPG	130.8132	1.082023	0.422547	2.560715	0.01044569	0.09099179
KCNJ8	209.1317	-1.098788	0.4291489	-2.560389	0.01045552	0.09102414
PSAT1	422.1242	1.058133	0.4133525	2.55988	0.01047082	0.0910448
SMO	1153.284	-0.6308444	0.2464524	-2.559701	0.01047624	0.0910448
TRUB2	415.7253	0.4376988	0.1709826	2.559902	0.01047017	0.0910448
TMUB1	358.3959	0.4802065	0.1876277	2.559359	0.01048655	0.09108124
LIMK1	674.0006	0.6012207	0.2349492	2.558939	0.01049922	0.0911014
PCDHB7	133.3209	-0.999443	0.3905789	-2.558876	0.01050111	0.0911014
MIR99AHG	162.8887	-1.091278	0.4266198	-2.557965	0.01052868	0.09128737
EPN3	197.0298	0.9060505	0.3543233	2.557129	0.010554	0.09140046
P3H2	310.5713	-0.952316	0.3724148	-2.557138	0.01055374	0.09140046
ALDOC	197.6081	-0.7870311	0.3078796	-2.556295	0.01057933	0.09140712
LOC100289230	38.24269	-0.8339353	0.3262093	-2.556443	0.01057484	0.09140712
PLEKHG1	908.4868	0.7009725	0.2741822	2.556593	0.01057027	0.09140712
USHBP1	155.1972	-1.012167	0.3958627	-2.556865	0.01056203	0.09140712
CCDC88A	527.7952	-0.4706263	0.1841588	-2.555547	0.01060211	0.09142454
GABBR1	720.3766	-0.9212393	0.3604631	-2.55571	0.01059714	0.09142454
NAP1L2	97.97324	-1.173624	0.4592682	-2.555422	0.01060591	0.09142454
NELFCD	1195.579	0.3575238	0.1398928	2.555699	0.01059748	0.09142454
COX8A	847.2557	0.4018667	0.1572942	2.554872	0.01062268	0.09147964
GPR37	86.03189	1.030038	0.4032078	2.554608	0.01063074	0.09147964
SLC5A3	797.469	-0.494429	0.1935367	-2.554705	0.01062779	0.09147964
GSTO2	154.9553	0.6929202	0.2713081	2.553998	0.0106494	0.09158727
DENND5B	376.3641	-0.5892409	0.2307428	-2.55367	0.01065942	0.09162056
CNNM1	44.91213	-1.259513	0.4932622	-2.553435	0.01066663	0.09162959
ZNF83	711.0065	-0.509685	0.1996621	-2.552738	0.01068799	0.09176013
ATP13A1	1443.059	0.4523995	0.1772754	2.551959	0.01071191	0.09180817
CHEK1	184.7806	0.9069989	0.3554479	2.551707	0.01071967	0.09180817
FAAH2	130.5638	0.8854881	0.3470132	2.551742	0.01071859	0.09180817
MTHFD1L	437.7504	0.8785439	0.3443174	2.551552	0.01072442	0.09180817
PNCK	58.00626	-0.98204	0.384813	-2.551993	0.01071087	0.09180817
CDK16	1385.223	0.4106044	0.1609641	2.550908	0.01074428	0.09183834
NUAK1	549.4997	-0.9282785	0.3639084	-2.550858	0.01074582	0.09183834
PDIA4	5931.085	0.6240883	0.244683	2.550599	0.01075378	0.09183834
RPS19BP1	529.2557	0.3796018	0.1488222	2.550707	0.01075047	0.09183834
TCEAL2	273.9714	-1.179051	0.4622938	-2.550437	0.01075879	0.09183834
PMM2	471.1145	0.6225104	0.2441271	2.549944	0.01077404	0.0919158
GPATCH4	471.4905	0.4221397	0.1656455	2.548452	0.01082021	0.09225683
PARPBP	69.7295	0.9524236	0.3737735	2.548131	0.01083019	0.09228911
GRHL2	1014.219	1.0429	0.4093813	2.547504	0.01084966	0.0924021
CCNA2	197.9465	0.9522252	0.3739226	2.546584	0.01087832	0.09251705
FLRT2	537.1908	-1.095851	0.4303748	-2.546273	0.01088801	0.09251705
MRPL51	996.8825	0.431226	0.1693442	2.546447	0.01088258	0.09251705
ST8SIA6	37.09566	1.176512	0.4620455	2.546312	0.0108868	0.09251705
AMY2B	156.7705	-0.799737	0.3142443	-2.544953	0.01092923	0.09256517
BRMS1	485.8426	0.5013681	0.1970356	2.544556	0.01094169	0.09256517
CASD1	450.7754	-0.5532994	0.2174525	-2.54446	0.01094467	0.09256517
GAD1	327.5892	1.157285	0.4548538	2.544302	0.01094964	0.09256517
OSBPL1A	850.2184	-0.7885889	0.3098858	-2.544772	0.0109349	0.09256517
PODXL2	573.8255	0.9494172	0.373098	2.544686	0.01093762	0.09256517
POM121C	895.1321	0.25406	0.09982793	2.544979	0.01092844	0.09256517
PRMT1	2330.406	0.5118098	0.2010597	2.545562	0.0109102	0.09256517
TNFRSF12A	413.9088	0.8762915	0.344278	2.545302	0.01091833	0.09256517
IPW	231.5385	-0.5353984	0.2104864	-2.543625	0.01097088	0.09267752
TSFM	385.8044	0.4531969	0.1781797	2.543482	0.01097538	0.09267752
ARHGEF6	440.8149	-0.8146371	0.3205488	-2.541382	0.01104151	0.09274923
CHCHD5	187.8871	0.5083563	0.1999082	2.542949	0.01099212	0.09274923
CYBA	2075.818	0.7530127	0.2963723	2.540766	0.01106098	0.09274923
FAM13B	751.1536	-0.3613781	0.1421928	-2.541465	0.0110389	0.09274923
GINS2	111.8668	0.9620828	0.378734	2.54026	0.01107701	0.09274923
IFI30	1548.109	1.006576	0.3961707	2.540764	0.01106106	0.09274923
IL1RN	76.37752	1.093965	0.4303435	2.542073	0.01101971	0.09274923
KANSL1L	345.0374	-0.5258868	0.2070217	-2.54025	0.01107732	0.09274923
LINC00663	93.98099	-0.5728073	0.2254514	-2.540714	0.01106265	0.09274923
NELL1	35.7787	-1.30847	0.5150333	-2.540555	0.01106768	0.09274923
OTUD1	263.1912	-0.8618051	0.3389989	-2.542206	0.01101553	0.09274923
PTGFR	295.4706	-1.279323	0.5034057	-2.541336	0.01104296	0.09274923
RADIL	105.9806	-1.026432	0.4038015	-2.541922	0.01102447	0.09274923
RAP1GAP	596.7452	0.8946626	0.3519162	2.54226	0.01101382	0.09274923
TOMM34	563.4504	0.5635502	0.2216945	2.542013	0.01102161	0.09274923
HOXD3	78.88178	-0.9392635	0.3699434	-2.538939	0.01111893	0.092993
PAXBP1-AS1	32.06827	-0.7714033	0.3038097	-2.5391	0.0111138	0.092993
CLEC1A	69.50579	-0.9551634	0.3764778	-2.537104	0.01117736	0.09299528
DCTN5	1049.687	0.335599	0.1322654	2.537315	0.01117065	0.09299528
FAM8A1	929.2512	-0.7822437	0.3082229	-2.537916	0.01115148	0.09299528
HMBS	280.5444	0.6781677	0.267196	2.538091	0.01114591	0.09299528
JAK2	392.8199	-0.6707043	0.2643722	-2.536969	0.01118167	0.09299528
KIAA1522	1583.493	0.7783491	0.3066637	2.538119	0.011145	0.09299528
KLF16	290.9461	0.3869251	0.1525145	2.536973	0.01118157	0.09299528
PHLDA2	54.36301	0.9476828	0.3733505	2.53832	0.01113862	0.09299528
PVRL2	1766.986	0.6535132	0.257592	2.537009	0.01118041	0.09299528
USP54	865.9099	0.6043086	0.2381579	2.537429	0.01116701	0.09299528
KRT4	81.18059	1.19079	0.4694882	2.536357	0.01120123	0.09310594
CAMSAP3	342.6125	0.8899366	0.3509116	2.536071	0.01121041	0.09313027
ACACA	1220.625	0.506152	0.1997911	2.533405	0.01129602	0.09332246
ATP6V0D1	1326.619	0.3602469	0.1421285	2.534656	0.01125578	0.09332246
ATP6V1F	784.5923	0.4035	0.1592413	2.53389	0.0112804	0.09332246
C10orf54	664.4285	-0.7841226	0.3093606	-2.534656	0.01125578	0.09332246
COL18A1	8314.283	0.8824307	0.3483189	2.533399	0.01129624	0.09332246
DKC1	1018.287	0.5858982	0.2312316	2.533816	0.01128281	0.09332246
EGR2	402.369	-0.9692722	0.382449	-2.534383	0.01126457	0.09332246
SLC2A3	962.8006	-0.7404129	0.2922235	-2.533721	0.01128586	0.09332246
UPF1	2446.911	0.4147662	0.1636146	2.53502	0.0112441	0.09332246
ZMIZ1	3948.505	-0.5002676	0.1974039	-2.534233	0.01126937	0.09332246
GALNT6	630.6364	0.9744357	0.3847287	2.532787	0.01131598	0.09343375
NOP16	225.0405	0.5875382	0.2320271	2.532197	0.01133504	0.0935392
PFDN2	476.9213	0.3558396	0.1405618	2.531553	0.01135587	0.09365921
E2F2	71.91146	1.157442	0.4572642	2.531231	0.01136629	0.09369319
HCG11	420.1652	-0.5629852	0.2224455	-2.53089	0.01137735	0.09373251
LYPD1	24.97425	1.239789	0.4899564	2.530406	0.01139305	0.09380989
TCEAL4	2467.81	-0.789034	0.3118488	-2.530181	0.01140036	0.09381826
KCNIP4	61.28709	-0.9722017	0.3843527	-2.529452	0.01142409	0.09386371
TMEM132C	198.7809	-1.287986	0.5091768	-2.529545	0.01142105	0.09386371
TNS2	2110.999	-0.9775499	0.3864705	-2.52943	0.0114248	0.09386371
CNTLN	271.7754	-0.5622289	0.2223144	-2.528981	0.01143942	0.09393198
FAXC	78.85313	-0.7774885	0.3074636	-2.528718	0.01144801	0.09395068
STX16	957.0374	-0.3797559	0.1502419	-2.527629	0.01148356	0.0941905
HDGF	4386.266	0.5802833	0.2295981	2.527387	0.01149147	0.09420351
GPX1	1952.612	0.5289826	0.2093958	2.526233	0.0115293	0.09436151
RBMS1	1329.139	-0.5349217	0.2117324	-2.526405	0.01152365	0.09436151
SCNN1D	98.83315	-0.8260753	0.3270058	-2.526179	0.01153107	0.09436151
STEAP2	318.7176	-0.7202209	0.2851202	-2.526026	0.0115361	0.09436151
IFNLR1	108.1848	0.7054017	0.2793233	2.525395	0.01155682	0.0944791
ZBTB26	142.6429	-0.4168729	0.1650989	-2.524989	0.0115702	0.09453651
RBPMS	1238.071	-0.7231388	0.2864225	-2.524728	0.01157878	0.09455477
ZDHHC17	692.6278	-0.5392484	0.2136099	-2.524454	0.01158782	0.09457671
SYNGR2	1852.728	0.4711223	0.1866891	2.523566	0.01161714	0.09476401
LUC7L3	1988.304	-0.4321475	0.1713009	-2.52274	0.01164445	0.09493481
GIPC3	65.70801	-0.935181	0.3707544	-2.522373	0.01165659	0.09498173
ADAM22	260.4084	-0.7340585	0.2912104	-2.520715	0.01171166	0.09506628
C1orf210	159.8184	0.9508987	0.377063	2.521856	0.01167375	0.09506628
CCDC137	350.8082	0.5506933	0.2184595	2.520803	0.01170875	0.09506628
ITIH4	110.3631	-0.5434782	0.2155659	-2.52117	0.01169654	0.09506628
SH3RF2	157.7258	1.013949	0.4021881	2.521082	0.01169946	0.09506628
SLC20A1	606.798	0.6511559	0.2582933	2.520994	0.01170239	0.09506628
SLC30A4	87.15212	-0.7153966	0.2837709	-2.521036	0.01170099	0.09506628
JUND	2094.55	-0.8359353	0.3316849	-2.52027	0.0117265	0.09513482
AMMECR1	295.3995	0.6510056	0.258461	2.518777	0.01177633	0.09545492
COL2A1	319.0153	-0.8703103	0.345539	-2.518703	0.01177878	0.09545492
SEC24C	2390.052	0.3500258	0.1390052	2.518077	0.01179977	0.09557296
C19orf52	165.1443	0.3569006	0.1417653	2.517545	0.01181758	0.09566522
STOML2	1106.916	0.3554989	0.1412266	2.517224	0.01182837	0.09570048
FANCF	377.9126	0.4151494	0.1649534	2.516767	0.0118437	0.09577251
CCNJL	78.28386	0.9416984	0.3743794	2.515358	0.01189115	0.09609161
ZNF835	38.61496	-1.17372	0.4666485	-2.515212	0.01189607	0.09609161
STK11IP	428.2694	0.3785839	0.1505496	2.514679	0.01191407	0.09618476
ITPRIP	787.7689	-0.5649175	0.2246854	-2.514259	0.01192827	0.09624721
CDK2AP2	946.6803	0.6776476	0.2696073	2.513462	0.01195527	0.09628956
EIF6	1512.775	0.3564552	0.1418235	2.513372	0.01195833	0.09628956
IMPDH1	668.546	0.4366079	0.1737162	2.51334	0.01195939	0.09628956
RNF34	466.9068	0.3813801	0.1517129	2.513827	0.01194288	0.09628956
EIF5A2	96.03156	-0.7125557	0.2835369	-2.513097	0.01196764	0.09630395
C10orf82	39.32272	1.232033	0.4903842	2.512383	0.01199189	0.09639076
FARSA	1032.379	0.5028613	0.200141	2.512535	0.01198672	0.09639076
HPGDS	32.36533	-0.8333148	0.3317062	-2.512207	0.01199786	0.09639076
HK1	2007.674	0.3794851	0.1510849	2.511734	0.01201395	0.0964122
MARVELD2	227.0653	0.9529341	0.3793827	2.511802	0.01201166	0.0964122
PCDHGA3	30.40183	-1.082198	0.4308872	-2.511558	0.01201995	0.0964122
ZCWPW1	90.94772	-0.6295883	0.2507107	-2.511214	0.01203167	0.09645424
RPS6KA1	789.1261	0.8271921	0.3295164	2.510322	0.01206211	0.09654155
SRSF9	803.7942	0.6587841	0.2624497	2.510135	0.0120685	0.09654155
TK2	499.0893	-0.3370316	0.1342507	-2.510464	0.01205725	0.09654155
UNC80	25.71976	-1.235378	0.4921439	-2.510198	0.01206636	0.09654155
ALDOA	9728.953	0.4590314	0.1829969	2.508411	0.01212755	0.09693954
KIF18A	89.28343	1.087315	0.4335193	2.508113	0.01213779	0.09693954
SULT1C4	146.6468	-0.7480331	0.298228	-2.508259	0.01213276	0.09693954
SHTN1	553.6052	0.603444	0.240644	2.507622	0.01215467	0.09697027
STRN4	1540.488	0.4025087	0.1605052	2.507762	0.01214986	0.09697027
SHE	214.2064	-1.016971	0.4056013	-2.507317	0.01216517	0.09700207
NUF2	91.69744	1.05256	0.4198373	2.507067	0.01217377	0.09701867
HOMER3	335.7841	0.6799681	0.2713464	2.505904	0.01221387	0.09728618
SGCE	570.346	-0.8142926	0.3249979	-2.505532	0.01222674	0.09733662
EHMT1	1200.587	0.2779035	0.1109538	2.504678	0.01225631	0.09751984
CUL4B	1264.221	-0.3206453	0.1280403	-2.504252	0.01227105	0.09753293
UBE2QL1	46.83274	-1.172548	0.4681901	-2.504426	0.01226502	0.09753293
AP4S1	156.3031	-0.6234086	0.249012	-2.503528	0.0122962	0.09758017
DHX8	836.4675	0.2899846	0.1158316	2.503502	0.0122971	0.09758017
ICA1	443.5059	0.7834909	0.3130507	2.502761	0.01232288	0.09758017
JAM2	524.6356	-1.094944	0.4374531	-2.502998	0.01231463	0.09758017
NOMO3	72.78581	0.4628981	0.1849372	2.503002	0.0123145	0.09758017
STOM	2555.438	-0.6731048	0.2689261	-2.502935	0.0123168	0.09758017
ZNF707	201.056	0.4552708	0.1818556	2.503474	0.01229807	0.09758017
TMEM120B	434.7134	-0.5758663	0.2301252	-2.502404	0.0123353	0.09762658
CPE	1148.308	-0.7780186	0.3109794	-2.501833	0.0123552	0.09762841
FAM222B	416.8463	0.426962	0.1706513	2.501956	0.01235093	0.09762841
UNC93B1	483.4694	0.610414	0.2439694	2.50201	0.01234904	0.09762841
GJC1	704.8022	-1.135105	0.453838	-2.501124	0.01237999	0.09777234
MLLT4	2920.794	0.4495526	0.179771	2.500696	0.01239496	0.09778682
PRDM5	127.3881	-1.067933	0.4270357	-2.500804	0.01239117	0.09778682
PLEKHB2	1787.166	0.5835897	0.2334258	2.500107	0.01241557	0.09789752
GINM1	523.1979	-0.5338614	0.2135968	-2.499388	0.0124408	0.09799268
HACD1	117.7285	0.8650817	0.3461113	2.499432	0.01243925	0.09799268
CHST4	68.42064	1.086008	0.4346228	2.498737	0.01246368	0.0980426
EI24	1424.193	0.3889092	0.155766	2.496753	0.01253363	0.0980426
ENTPD7	462.5601	0.8675529	0.3473301	2.497777	0.01249749	0.0980426
GGT6	184.2257	1.163256	0.4659561	2.496492	0.01254284	0.0980426
GIMAP6	545.9206	-0.7599961	0.3042229	-2.498155	0.01248414	0.0980426
IQCA1	52.24313	-0.9862546	0.3949339	-2.497265	0.01251554	0.0980426
KRT16	59.06181	1.111569	0.4451518	2.497055	0.01252294	0.0980426
LARP1	3819.791	0.2218884	0.08882999	2.4979	0.01249314	0.0980426
LINC00667	329.5791	-0.9141518	0.3661873	-2.496405	0.01254592	0.0980426
MPDU1	570.7785	0.604231	0.2418466	2.498406	0.01247532	0.0980426
MSI1	320.2614	0.8174649	0.3273829	2.496968	0.01252601	0.0980426
MTSS1L	1583.069	-0.6025867	0.2413145	-2.497101	0.01252134	0.0980426
PCDHGB4	26.78003	-1.115449	0.446569	-2.497819	0.01249598	0.0980426
PSMB5	1392.346	0.4730606	0.1894688	2.496773	0.01253291	0.0980426
RIMS3	133.9409	-1.039342	0.4161501	-2.497517	0.01250665	0.0980426
LOC284454	363.1512	-0.7591016	0.3041092	-2.496148	0.01255503	0.09806231
HLCS	494.5099	0.5677081	0.2274767	2.495676	0.01257174	0.09814129
COL22A1	78.35296	-1.099661	0.4407909	-2.494746	0.01260473	0.09834731
CAPN9	46.37734	0.9201318	0.3689493	2.493925	0.01263392	0.09852339
ITPA	556.4878	0.4221939	0.1693247	2.493398	0.01265269	0.09861811
MRPL52	381.7117	0.3228895	0.1295151	2.493064	0.01266461	0.09865938
DZIP1	590.8663	-0.8931677	0.35832	-2.492654	0.01267923	0.09872159
CCNE2	71.03917	0.8441086	0.3387066	2.492152	0.01269716	0.0988095
CACNA1C	1020.192	-1.082413	0.434459	-2.491404	0.01272392	0.09883608
CRLF1	42.80486	1.205427	0.4839245	2.49094	0.01274055	0.09883608
KLHL4	44.53527	-1.248653	0.5013525	-2.490569	0.01275388	0.09883608
LTBP1	3212.306	-0.7884838	0.3165819	-2.490615	0.01275221	0.09883608
LYPD6	102.1012	0.6524123	0.2618664	2.491394	0.01272429	0.09883608
MTHFD1	888.4511	0.552643	0.2219619	2.48981	0.01278114	0.09883608
NEK9	1874.497	-0.4070883	0.1635123	-2.48965	0.01278688	0.09883608
PCDHGB7	120.3587	-1.051569	0.4223474	-2.489821	0.01278075	0.09883608
PCSK5	334.1887	-0.8719596	0.3501857	-2.489992	0.01277459	0.09883608
SAMD5	143.5259	-1.012343	0.4063939	-2.491038	0.01273705	0.09883608
SLC35B1	528.0991	0.5358862	0.2151329	2.490955	0.01274003	0.09883608
TPPP	181.545	-0.9772803	0.3924227	-2.490377	0.01276077	0.09883608
VAV3	855.5491	0.9678268	0.3884001	2.49183	0.0127087	0.09883608
PRR7	36.71588	0.7578566	0.3045274	2.488632	0.01282358	0.0990683
C10orf128	123.4919	-0.6189962	0.2487903	-2.488024	0.0128455	0.09918617
ATRNL1	391.0278	-1.216736	0.4891592	-2.487403	0.01286797	0.09920531
AXL	980.1875	-0.8282533	0.332978	-2.487411	0.01286765	0.09920531
GUK1	1624.134	0.3398732	0.1366347	2.487459	0.01286593	0.09920531
TMEM132A	2095.694	0.7802445	0.3137904	2.486515	0.01290011	0.09940163
FAM19A2	35.87699	-1.052857	0.423491	-2.486139	0.01291376	0.09945534
C12orf49	493.8326	0.577025	0.2321946	2.485093	0.01295177	0.09948901
FBXL19	514.3544	0.5429874	0.2185918	2.484024	0.01299071	0.09948901
GDPD3	62.88595	-0.8856959	0.3565167	-2.484304	0.0129805	0.09948901
LOC653160	40.1108	-0.9694654	0.3902796	-2.484027	0.01299058	0.09948901
MASTL	186.8337	0.5714474	0.2299845	2.484721	0.01296531	0.09948901
MBTPS2	383.9577	-0.4290277	0.1726239	-2.485331	0.01294309	0.09948901
MIEN1	375.4169	0.485772	0.1955054	2.484698	0.01296614	0.09948901
PLA2R1	420.4979	-0.8617125	0.346863	-2.484303	0.01298055	0.09948901
PLIN4	854.0048	-1.151883	0.4637215	-2.483998	0.01299165	0.09948901
POC1A	128.1221	0.9755032	0.3925801	2.484852	0.01296054	0.09948901
TLE4	453.9278	-0.8138776	0.3275129	-2.485024	0.01295426	0.09948901
ABCC10	533.3141	0.3778621	0.1521381	2.483678	0.01300334	0.09949601
PRND	52.62996	-1.259299	0.5070818	-2.483424	0.01301261	0.09949601
SOCS5	495.3153	-0.4577535	0.1843112	-2.483591	0.01300651	0.09949601
FAM111B	91.30789	1.001868	0.4034869	2.483025	0.01302719	0.09954832
GPSM1	412.8936	-0.8696242	0.3502494	-2.482871	0.01303283	0.09954832
ADGRD1	410.8674	-1.202214	0.4843177	-2.482285	0.0130543	0.0996521
CENPH	94.30155	0.7926799	0.3193776	2.481952	0.01306649	0.0996521
CHPT1	276.9236	-0.7398217	0.2980771	-2.481981	0.01306543	0.0996521
RNF11	1405.359	-0.464756	0.18728	-2.481611	0.01307901	0.09969648
PSMD4	1496.008	0.2811389	0.113304	2.481279	0.01309119	0.09973823
BEX2	258.1543	-0.8043953	0.3242368	-2.480888	0.01310554	0.09978982
MTUS2	35.84652	-1.227311	0.494738	-2.48073	0.01311136	0.09978982
TCEB2	1257.753	0.3633687	0.1465139	2.480098	0.01313464	0.0999159
RPN2	4168.646	0.5486761	0.2212558	2.479826	0.01314464	0.09994087
CENPO	138.0837	0.7595458	0.3064007	2.47893	0.01317773	0.100049
PSMC2	1097.066	0.3181075	0.1283233	2.478953	0.01317685	0.100049
SLC12A7	1458.733	0.5023165	0.2026373	2.478895	0.01317903	0.100049
ARHGAP33	363.5823	-0.6548286	0.2642002	-2.478532	0.01319244	0.1000765
GAS2L3	81.68119	0.784988	0.3169826	2.476439	0.01327003	0.1000765
GPS1	1274.574	0.2829279	0.1142387	2.476638	0.01326263	0.1000765
IMP3	438.0513	0.2912814	0.1175811	2.47728	0.0132388	0.1000765
KIAA1107	99.81577	-0.5643222	0.2277906	-2.477372	0.01323537	0.1000765
LOC100129550	130.9796	-0.6441829	0.2600829	-2.476837	0.01325525	0.1000765
MEMO1	332.4826	0.4370727	0.1763903	2.477873	0.01321681	0.1000765
PAPPA	293.1294	-1.147488	0.4633594	-2.476453	0.01326953	0.1000765
STON2	486.411	1.003147	0.4048555	2.477791	0.01321987	0.1000765
SUSD3	149.0635	-0.8444295	0.3409624	-2.476606	0.01326382	0.1000765
TIMM10	250.5506	0.5733063	0.2314439	2.477085	0.01324603	0.1000765
WIBG	366.5366	0.4804329	0.1938485	2.478393	0.01319756	0.1000765
ZNF25	332.3628	-0.7633719	0.3081889	-2.476961	0.01325063	0.1000765
GRPEL1	372.9723	0.4679691	0.18911	2.474588	0.01333901	0.1004609
ST6GAL1	1499.263	0.531447	0.214767	2.474528	0.01334125	0.1004609
TEAD1	1824.731	-0.4864597	0.1965796	-2.474619	0.01333782	0.1004609
GSG2	43.30114	1.069343	0.432438	2.472823	0.01340505	0.1005182
HOXD4	110.3334	-1.092199	0.4415884	-2.473341	0.01338565	0.1005182
1-Mar	145.124	0.7893539	0.3191068	2.473635	0.01337462	0.1005182
NAV2	1018.627	0.7400188	0.2991881	2.473423	0.01338256	0.1005182
NDUFB9	985.0753	0.3997661	0.1616643	2.472816	0.0134053	0.1005182
PHACTR1	76.69833	0.8573878	0.3467056	2.472957	0.01340004	0.1005182
PPIF	680.2545	0.7471074	0.3021398	2.472721	0.01340889	0.1005182
RAD54L	126.3599	1.080087	0.4368636	2.472367	0.01342215	0.1005182
SRD5A3	631.647	0.7254622	0.293448	2.4722	0.01342842	0.1005182
TRMT13	164.9337	-0.3244637	0.131247	-2.472162	0.01342988	0.1005182
UBAP2	662.5707	0.4296415	0.173787	2.47223	0.01342729	0.1005182
ZYG11B	778.5788	-0.545876	0.2207108	-2.473264	0.01338853	0.1005182
LCA5	230.6977	-0.513206	0.2076826	-2.471108	0.01346952	0.1007136
RAB3IL1	634.2045	-0.8236001	0.3332694	-2.471274	0.01346327	0.1007136
ARRDC1	578.5992	0.5446189	0.220485	2.470094	0.01350774	0.1008096
C1orf112	131.5484	0.5632783	0.2280291	2.470203	0.01350363	0.1008096
LAP3	1731.673	0.5479516	0.2218383	2.470049	0.01350945	0.1008096
TGFBR2	2359.69	-0.6304386	0.2552126	-2.470249	0.01350191	0.1008096
C17orf96	107.3536	0.9471817	0.3835512	2.469505	0.01353001	0.1008619
NONO	6549.668	0.3965473	0.1605703	2.469618	0.01352575	0.1008619
THSD7A	278.2057	-0.6552407	0.2653632	-2.469223	0.0135407	0.1008911
GLB1	1602.432	0.6238119	0.2526545	2.469032	0.01354792	0.1008944
[truncated: 24,365 more rows]
