# Supplementary material for: RNA-seq Reveals the Overexpression of IGSF9 in Endometrial Cancer
Source: J Oncol. 2018 Feb 14;2018:2439527. doi: 10.1155/2018/2439527 (PMC5832105; doi:10.1155/2018/2439527)
Supplement: Supplementary 3 — Supplementary Table 3: differentially expressed genes as independent groups. [file 2439527.f3.csv]

	baseMean	log2FoldChange	lfcSE	stat	pvalue	padj
HHATL	13.79029806	-2.010133941	0.356977793	-5.630977552	1.79E-08	0.000407731
IGSF9	349.7912656	1.647813598	0.335627399	4.909651602	9.12E-07	0.010380186
C10orf35	127.8772564	0.982711732	0.211487582	4.646663994	3.37E-06	0.025586567
ZNF710	448.3041296	0.707118189	0.158814322	4.45248376	8.49E-06	0.048285502
BST2	3157.822077	1.751061725	0.398767125	4.391188775	1.13E-05	0.051302357
ARRDC4	521.0582278	-0.882962071	0.213127973	-4.14287274	3.43E-05	0.065035158
ARVCF	525.5530544	0.931088417	0.224674078	4.144173759	3.41E-05	0.065035158
CHRNA1	9.205702192	1.895546614	0.454227166	4.173124717	3.00E-05	0.065035158
ICA1L	281.0097204	-0.971998697	0.234114679	-4.151805871	3.30E-05	0.065035158
MIR631	11.50603929	-1.226503006	0.28918432	-4.241250029	2.22E-05	0.065035158
P2RX6	12.8206028	-1.621310367	0.384635244	-4.215189307	2.50E-05	0.065035158
RNFT2	34.86468267	1.399819142	0.328402842	4.262506177	2.02E-05	0.065035158
GBAT2	14.77286318	1.255297015	0.310018482	4.049103804	5.14E-05	0.083562664
TUBB3	982.3949317	1.920347681	0.473518651	4.055484775	5.00E-05	0.083562664
DNAJC27-AS1	32.97380218	-1.21250724	0.305305741	-3.971452477	7.14E-05	0.101590569
RAC3	90.72377107	1.518648825	0.381531731	3.980399803	6.88E-05	0.101590569
HAS3	251.7282303	1.897515241	0.481982308	3.936898115	8.25E-05	0.110479545
CLK4	396.7658559	-0.822653136	0.211604817	-3.887686232	0.000101204	0.12530651
KCNK4	4.394652881	-1.851611992	0.478947527	-3.86600178	0.000110634	0.12530651
MCF2L	661.7139896	0.731212749	0.189670478	3.855174279	0.000115647	0.12530651
ZNF486	180.1452059	-1.775753763	0.45996391	-3.860637158	0.000113092	0.12530651
ADGRV1	170.2891856	1.736179908	0.457606296	3.794047244	0.000148211	0.126885516
ASTN1	125.314192	-1.712544535	0.452048787	-3.788406435	0.000151617	0.126885516
BAK1	381.5032861	0.718068111	0.189549424	3.788289592	0.000151688	0.126885516
GZMK	58.72738139	-1.246601883	0.324621725	-3.840167757	0.00012295	0.126885516
LINC00152	58.47376615	1.018976131	0.268117351	3.800485599	0.000144413	0.126885516
S100PBP	398.061215	-0.578669888	0.153042891	-3.781096175	0.000156139	0.126885516
TP53BP2	658.7318227	0.374394292	0.097960643	3.821884795	0.000132436	0.126885516
JAZF1	554.600932	-1.264397414	0.335938475	-3.763776726	0.000167366	0.126941782
SDCCAG3	392.2810928	0.418609511	0.111196731	3.76458469	0.000166826	0.126941782
GEMIN8P4	13.66555262	1.214811238	0.32483294	3.739803109	0.000184164	0.135176708
C1QTNF7	301.5181067	-1.500404089	0.403601803	-3.717535647	0.000201176	0.13871363
VARS	1311.90431	0.61292329	0.164589323	3.723955342	0.000196126	0.13871363
EXOSC4	168.5808553	0.731955861	0.19878538	3.682141324	0.000231283	0.142314349
MYL3	15.46749062	-1.417774724	0.384427007	-3.688020607	0.000226005	0.142314349
PDS5B	900.31256	-0.707185058	0.192065711	-3.681995368	0.000231416	0.142314349
TUBA1C	2089.723593	1.363787865	0.368774876	3.698158292	0.000217169	0.142314349
BCAP29	858.2984172	-0.931818948	0.255876773	-3.641670702	0.000270874	0.142876578
CFL1	8307.677762	0.607433858	0.169693711	3.579589697	0.000344134	0.142876578
CHFR	415.7718712	0.663300145	0.185464262	3.57643104	0.000348317	0.142876578
ECE2	106.3103916	1.259289311	0.347935935	3.619313745	0.000295385	0.142876578
EPHB1	43.55906576	-1.51820058	0.423536507	-3.584580209	0.000337621	0.142876578
GNG12-AS1	14.54321499	-1.128346803	0.313481202	-3.599408177	0.000318942	0.142876578
GUCY1A2	1279.253084	-1.444906889	0.403776675	-3.578480333	0.000345598	0.142876578
HNMT	859.2822434	-0.85336554	0.232828142	-3.665216467	0.000247129	0.142876578
HPS6	319.6895623	0.40850198	0.114318349	3.573371921	0.000352414	0.142876578
INA	55.53367329	1.751085162	0.484322563	3.615534972	0.000299728	0.142876578
KRIT1	579.4138036	-0.349575383	0.097063249	-3.601521534	0.00031636	0.142876578
LGI3	7.451723924	-1.759201189	0.486472302	-3.616241217	0.000298912	0.142876578
LIMK2	1138.304172	0.663477772	0.18384747	3.608849068	0.000307558	0.142876578
NLGN1	28.23714944	-1.548214446	0.431484545	-3.588111012	0.000333082	0.142876578
PGAP2	345.139086	0.460919637	0.128971995	3.573796282	0.000351843	0.142876578
PRR36	283.3765577	1.402906105	0.388829006	3.608028419	0.000308533	0.142876578
SLC2A13	222.1865686	-1.166528557	0.323223034	-3.60905144	0.000307319	0.142876578
TSPAN17	559.7434804	0.701926513	0.196255369	3.576597749	0.000348095	0.142876578
ZMIZ2	2091.762432	0.589992228	0.165133063	3.572829185	0.000353145	0.142876578
ZMYM1	179.5080947	-0.649589671	0.181992725	-3.569316692	0.000357914	0.142876578
ACTR1A	1723.039793	0.458551048	0.129873321	3.53075632	0.000414373	0.143350537
COL28A1	73.21384934	-1.076925415	0.305549415	-3.524554012	0.000424196	0.143350537
DGKZ	982.9388418	0.39888941	0.11293285	3.532093706	0.000412283	0.143350537
HN1	790.8268357	1.26229212	0.359536157	3.510890617	0.000446608	0.143350537
NAV1	790.8897231	0.721299812	0.203264206	3.548582544	0.000387311	0.143350537
PAFAH1B3	207.4174934	1.053982402	0.296614857	3.553370232	0.000380329	0.143350537
PYHIN1	23.87906675	-0.978072586	0.275309736	-3.552626216	0.000381406	0.143350537
RAMP2-AS1	29.21226617	-1.396573393	0.396833834	-3.51929012	0.000432703	0.143350537
SFRP4	14449.16513	-1.569041878	0.443839326	-3.535157404	0.000407532	0.143350537
SNX11	294.4361681	0.473179247	0.134790529	3.510478457	0.000447301	0.143350537
ST8SIA2	29.75212669	1.69842008	0.48006504	3.537895781	0.000403329	0.143350537
VSIG2	71.37523876	-1.502846974	0.427587393	-3.514713013	0.000440229	0.143350537
YKT6	1147.438251	0.563853872	0.160287437	3.517767102	0.000435194	0.143350537
ZNF704	2288.488408	-0.741028696	0.208096051	-3.560993556	0.000369454	0.143350537
CACFD1	459.1050753	0.70831237	0.204585133	3.462188869	0.000535801	0.148713961
CCDC51	198.7592742	0.588122413	0.17042746	3.450866496	0.00055879	0.148713961
EDNRA	913.1851432	-1.265351011	0.364411829	-3.472310477	0.000515999	0.148713961
EPDR1	913.9059847	-1.029165579	0.295820488	-3.479020622	0.00050325	0.148713961
EPHA10	10.38975146	-1.595050188	0.461851296	-3.453601192	0.000553155	0.148713961
GIPC1	1520.181159	0.883044032	0.253017617	3.490049599	0.000482931	0.148713961
METTL13	798.9641746	0.537112285	0.154762842	3.470550674	0.000519392	0.148713961
MRPL14	489.6702824	0.604576685	0.175164898	3.451471674	0.000557538	0.148713961
NFKBIB	265.1755685	0.534600425	0.15507801	3.447300007	0.000566219	0.148713961
NMRAL1	472.8505275	0.466231807	0.1343087	3.471344793	0.000517859	0.148713961
PDCL3	415.1760915	0.706517164	0.203868859	3.465547246	0.000529154	0.148713961
PDGFD	362.985419	-0.843217449	0.242348978	-3.479352202	0.000502628	0.148713961
RNF139	471.0704881	-0.502439158	0.145536015	-3.452335538	0.000555756	0.148713961
SMPDL3B	351.0636089	1.34496364	0.390278649	3.446162485	0.000568608	0.148713961
TRAF7	1491.690858	0.772780282	0.222082437	3.47970011	0.000501975	0.148713961
TWF2	830.4709824	0.590132796	0.168961363	3.49270855	0.000478148	0.148713961
EFNA4	156.6948862	0.890888747	0.259238131	3.436565227	0.00058914	0.148947804
PSMD2	2830.831803	0.514942653	0.149645825	3.441075971	0.000579406	0.148947804
VPS18	623.6719833	0.498198006	0.144933194	3.437432039	0.000587258	0.148947804
ATP13A2	796.2009272	0.899260309	0.263486585	3.412926354	0.000642693	0.15070217
CEP112	199.4456805	-0.833165464	0.244396914	-3.409067041	0.000651855	0.15070217
DNMT3B	164.9920097	1.421580942	0.416219292	3.415461436	0.00063674	0.15070217
GOPC	876.0511656	-0.463205618	0.135938388	-3.407467335	0.000655688	0.15070217
KISS1R	3.168001498	1.662577072	0.486404166	3.41809793	0.000630604	0.15070217
MTA2	1633.661442	0.528063156	0.154520002	3.417442063	0.000632125	0.15070217
NBEAL2	1385.726246	0.833011563	0.243276133	3.4241401	0.000616748	0.15070217
NRXN1	34.09583411	-1.658765828	0.486440915	-3.410004743	0.000649617	0.15070217
SLC9A3	30.67530664	-1.01121429	0.295835956	-3.418158852	0.000630463	0.15070217
ABCD2	70.48167449	-1.386788595	0.409803112	-3.384036267	0.000714286	0.150978028
CCDC120	303.5114026	0.455616864	0.134239206	3.394067038	0.000688628	0.150978028
FAS-AS1	4.130825429	-1.421859034	0.421214881	-3.375614436	0.000736511	0.150978028
GPR22	67.51997844	-1.636577653	0.484477345	-3.378027209	0.000730079	0.150978028
GUCY2EP	1.838349369	-1.616541696	0.478682199	-3.377066662	0.000732633	0.150978028
HRC	92.45538511	-1.629728483	0.479283291	-3.400344876	0.000673009	0.150978028
LRRTM1	259.2275191	1.645392183	0.484926909	3.393072547	0.000691133	0.150978028
MEX3A	802.830434	1.3061147	0.385829283	3.385214027	0.000711228	0.150978028
PTPRN2	179.2686845	-1.324410931	0.391176594	-3.385711089	0.000709941	0.150978028
RALGAPA1	32.30045541	-0.761822917	0.224471796	-3.393846937	0.000689182	0.150978028
SMAD5	1332.615602	-0.553428707	0.163083362	-3.393532616	0.000689973	0.150978028
ZSCAN16	55.42825654	0.632154751	0.187009525	3.380334502	0.000723977	0.150978028
CRIP2	1980.31193	0.656399575	0.195086843	3.364653221	0.000766399	0.151640407
KIAA1586	130.5462748	-0.630808454	0.187385612	-3.366365464	0.000761657	0.151640407
MMP3	7.566732899	1.637739095	0.486452272	3.366700477	0.000760733	0.151640407
SNRK	401.4568357	-0.786283341	0.233364143	-3.369340851	0.000753482	0.151640407
ABCC1	1681.233821	0.825515981	0.245908783	3.357000795	0.000787929	0.154166662
ADRM1	1244.811063	0.457965103	0.137203556	3.337851555	0.000844288	0.154166662
APEX2	373.7236448	0.650406478	0.195045274	3.33464361	0.000854088	0.154166662
APOB	5.61608902	-1.557717361	0.468560679	-3.32447307	0.000885858	0.154166662
C11orf84	437.8664426	0.520217543	0.156665193	3.320568745	0.000898342	0.154166662
CCDC6	1802.446201	0.697381249	0.208772674	3.340385678	0.000836621	0.154166662
DCTPP1	521.1472933	0.792778261	0.238870543	3.318861549	0.000903852	0.154166662
DGKE	403.5230316	-0.861802769	0.259248878	-3.324229501	0.000886632	0.154166662
ETHE1	374.7003783	0.848601544	0.255673378	3.319084492	0.000903131	0.154166662
LAMTOR2	473.2869642	0.712917796	0.212732253	3.351244524	0.000804492	0.154166662
MMP15	610.6770732	1.123627418	0.335360102	3.350510125	0.000806629	0.154166662
MRPS12	274.8991091	0.775873296	0.233090031	3.32864212	0.000872705	0.154166662
MTHFD2	664.7145736	1.027789555	0.309991939	3.315536391	0.000914674	0.154166662
PM20D2	484.7045295	-0.637499971	0.192184967	-3.317116741	0.000909516	0.154166662
PRICKLE2	481.119852	-1.113632864	0.334328416	-3.330954866	0.000865486	0.154166662
PTPRVP	6.990554261	-1.372330577	0.410470714	-3.343309349	0.000827856	0.154166662
PUF60	2087.384552	0.66471365	0.199968775	3.324087223	0.000887084	0.154166662
SLC25A44	449.9156823	0.496820736	0.14980987	3.316341808	0.000912042	0.154166662
SNORA11	3.48997077	-1.396747848	0.420125891	-3.324593599	0.000885475	0.154166662
TSTA3	749.358842	0.825744597	0.24869426	3.320320283	0.000899142	0.154166662
TM7SF2	330.2200632	1.165633189	0.352802601	3.30392459	0.000953415	0.159514699
KBTBD3	90.42481222	-0.518944597	0.157208638	-3.30099289	0.000963433	0.160014306
ADAMTS15	230.5575239	1.424032832	0.431696154	3.298692424	0.000971363	0.16016224
H2AFY2	1087.418951	0.951595064	0.289488676	3.287158162	0.00101204	0.162168681
MARS2	118.257713	0.640438589	0.194796585	3.28773006	0.001009986	0.162168681
PRC1	308.9081527	1.112738953	0.338418092	3.288059882	0.001008804	0.162168681
SLC35G1	38.25584475	1.065042683	0.323857264	3.288617556	0.001006807	0.162168681
LRRC4B	227.87936	-1.464592731	0.446335195	-3.281374061	0.001033026	0.162372068
NACC1	1288.324297	1.00843869	0.307249122	3.282153202	0.001030176	0.162372068
TMEM189	262.8348736	0.58762752	0.179104883	3.280912886	0.001034717	0.162372068
EIF4EBP1	281.7984015	0.991046215	0.302879512	3.272080732	0.001067591	0.166383305
TRPC4AP	1409.249402	0.348786865	0.106658947	3.270113518	0.001075043	0.166405007
TK2	499.0892942	-0.339628344	0.104030745	-3.264692028	0.001095832	0.16734598
TMEM220	85.75004374	-0.849535508	0.260212242	-3.26477918	0.001095494	0.16734598
AQP8	15.61522241	-1.574079599	0.485708488	-3.240790798	0.001191986	0.168462456
AVPR1A	592.0497116	-1.549450951	0.477840976	-3.242607957	0.001184411	0.168462456
CLIC3	39.11180202	1.156468327	0.356469433	3.244228594	0.001177692	0.168462456
E2F3	338.9758095	0.975014192	0.300294819	3.246856519	0.001166872	0.168462456
FUOM	74.3432413	1.01405686	0.311400236	3.25644217	0.001128179	0.168462456
HIPK3	2131.672462	-0.670653076	0.206118335	-3.253728379	0.001139011	0.168462456
MBNL2	898.396213	-0.80208206	0.246631228	-3.25215126	0.001145351	0.168462456
NAA16	288.6336615	-0.440977522	0.136051524	-3.241253829	0.001190052	0.168462456
PLLP	429.378825	1.147532418	0.35277339	3.252888261	0.001142384	0.168462456
SBK1	584.3240012	1.36532705	0.420481492	3.247056231	0.001166053	0.168462456
VAX2	38.90134013	1.393114557	0.427849348	3.256086668	0.001129593	0.168462456
ZBTB7C	151.6308	1.071145641	0.329560769	3.250221936	0.00115315	0.168462456
IRAK1	1333.622852	0.647982326	0.201170662	3.221057776	0.001277184	0.177336067
NANOS3	10.7873979	1.138593127	0.353304581	3.222695628	0.001269904	0.177336067
SPHK2	451.5237527	0.750369557	0.232973234	3.220840197	0.001278154	0.177336067
NADK2	379.7447626	-0.488142961	0.151693942	-3.21794631	0.00129112	0.178049338
AIMP2	160.2312976	0.678680818	0.211029051	3.216053968	0.001299664	0.178147904
CCNE1	155.8683467	1.346192165	0.419677282	3.20768415	0.001338084	0.179097628
CSMD3	9.903087902	-1.555086882	0.484912131	-3.206945716	0.001341523	0.179097628
KLC3	62.83304388	1.204660398	0.375546001	3.207757221	0.001337744	0.179097628
TIPARP	747.0961185	-0.947512542	0.295085548	-3.210975756	0.001322851	0.179097628
VPS37B	624.6863147	0.809686433	0.252553605	3.205998326	0.001345948	0.179097628
AIFM2	302.0925469	0.588515867	0.184233721	3.1943982	0.001401227	0.182863162
FBN2	741.7808975	1.33809126	0.418788264	3.195149856	0.001397583	0.182863162
GRWD1	628.1833694	0.477126822	0.149413289	3.193335908	0.001406392	0.182863162
RRP36	310.5427791	0.44086717	0.137991751	3.194880599	0.001398887	0.182863162
ACOX3	241.9465437	0.44857125	0.140568471	3.191122781	0.00141721	0.183222758
ALDH4A1	377.3684407	0.711157705	0.223106838	3.187520881	0.001434981	0.184472072
FOS	22562.62116	-1.519024091	0.477581005	-3.180662705	0.001469386	0.184720492
GAPDH	28359.77917	1.078791828	0.338926551	3.182966411	0.001457745	0.184720492
PCDH18	1103.432202	-0.97887189	0.307729787	-3.180946181	0.001467949	0.184720492
RUNDC3B	82.35401625	-1.061183863	0.333278	-3.18408015	0.001452148	0.184720492
ATG4D	200.7105932	0.607918383	0.191830363	3.169041507	0.001529426	0.185620364
KCNIP4	61.28709277	-1.121432261	0.353925594	-3.168553727	0.001531994	0.185620364
KCTD5	428.5632454	0.618728753	0.194937064	3.173992362	0.001503576	0.185620364
NOP2	596.7613023	0.667209449	0.210593083	3.168240094	0.001533648	0.185620364
PPP1R37	609.1965825	0.483056524	0.15202525	3.177475611	0.001485632	0.185620364
SLC16A9	300.0842637	-0.980239107	0.309210451	-3.170135756	0.001523677	0.185620364
THEM6	523.8980673	0.937495346	0.295834323	3.168987753	0.001529708	0.185620364
CUX2	57.98415849	-1.437292728	0.455260148	-3.157080041	0.001593576	0.185756806
FAM32A	1024.326043	0.478267854	0.151246699	3.162170523	0.001565978	0.185756806
FGF18	128.4090545	1.445015138	0.45787862	3.155891264	0.001600085	0.185756806
GOLGA8M	11.82831751	-1.362440719	0.431302516	-3.158898152	0.001583668	0.185756806
MAPKAPK5	404.5131676	0.497456569	0.157362565	3.16121289	0.001571136	0.185756806
MPV17L2	177.9149927	0.790516426	0.25039865	3.157031501	0.001593841	0.185756806
PFKP	1625.359423	0.745400682	0.235744909	3.161895138	0.00156746	0.185756806
TUBA3D	49.43896763	-1.469256831	0.465022462	-3.159539484	0.001580187	0.185756806
ORM2	13.14658637	-1.436363568	0.455741534	-3.15170653	0.001623193	0.18748294
SKIV2L	838.9435157	0.311805846	0.098981629	3.150138555	0.00163193	0.187540132
ITPR3	1626.096337	0.835389965	0.26631718	3.136823405	0.00170789	0.194306603
RNF4	1241.165323	0.346960692	0.110573303	3.137834208	0.001702011	0.194306603
GRB7	404.3236454	1.118028277	0.357011213	3.131633509	0.001738367	0.196790094
NXPH4	38.07245727	1.505700753	0.481497718	3.127119189	0.001765283	0.197868275
URB2	219.8314123	0.601544557	0.192322316	3.127793852	0.001761237	0.197868275
C19orf52	165.1443413	0.370891974	0.119210143	3.111245098	0.001863002	0.199178464
DHCR7	570.9699359	0.962152255	0.309251881	3.111225231	0.001863128	0.199178464
EREG	12.63892469	1.516559135	0.486303671	3.118543465	0.001817473	0.199178464
FBN3	99.03140915	1.501393473	0.482425004	3.112180048	0.001857112	0.199178464
GABRB2	6.916262571	-1.33730328	0.429174221	-3.115991628	0.001833275	0.199178464
HOXD8	182.3316706	-1.19637696	0.384562659	-3.111006571	0.001864508	0.199178464
KRT8	8810.390441	1.29147013	0.413777994	3.12116678	0.00180136	0.199178464
NOXO1	17.42453418	1.085199033	0.348148293	3.117059757	0.001826645	0.199178464
PSMC4	1415.531985	0.590963522	0.189461434	3.119175818	0.001813577	0.199178464
TARID	8.999208118	-1.451201351	0.46610931	-3.113435669	0.001849228	0.199178464
GATA5	28.33626597	-1.462916566	0.470690471	-3.108022481	0.001883437	0.200260443
ABRACL	563.2499448	1.111429143	0.358311341	3.101853097	0.001923134	0.200396789
BAX	813.0354338	0.732706427	0.236292422	3.100846065	0.001929686	0.200396789
COL18A1	8314.283423	1.090947105	0.351643832	3.102420707	0.00191945	0.200396789
HPSE2	153.3995496	-1.501050337	0.483872783	-3.102159062	0.001921147	0.200396789
SNRPG	549.821151	0.72486626	0.23391341	3.098865778	0.00194263	0.200396789
TNFAIP1	815.5252068	0.455180097	0.146686009	3.103091419	0.001915105	0.200396789
TOMM40	720.733456	0.793264036	0.256032363	3.098295963	0.001946369	0.200396789
BIK	68.24988525	1.308711767	0.423141246	3.092848502	0.001982453	0.201190657
CDC42SE1	1442.041777	0.442652509	0.143520018	3.084256216	0.002040618	0.201190657
DHX37	534.0524199	0.591320771	0.191739375	3.083981952	0.0020425	0.201190657
EFNA3	79.65323364	1.158957887	0.374894543	3.091423735	0.001991991	0.201190657
GATAD2A	1259.612535	0.683728288	0.221559975	3.085973845	0.002028867	0.201190657
KRT14	3.603853766	1.499231609	0.485516056	3.087913554	0.002015671	0.201190657
LINC00622	7.409445719	-1.344060695	0.43539359	-3.087001569	0.002021865	0.201190657
LOC100505912	3.940876533	1.409755885	0.456670539	3.087030505	0.002021668	0.201190657
PODXL2	573.8254966	1.13308574	0.366028034	3.095625568	0.001963982	0.201190657
STMN1	2043.553036	0.856782614	0.277220322	3.090619792	0.001997392	0.201190657
FASN	2144.990303	0.790086572	0.256365212	3.081879035	0.002056984	0.201744034
MCM10	107.8095782	1.357699044	0.441204798	3.077253582	0.002089175	0.202285472
SLC38A1	1876.997388	0.938266943	0.304847508	3.077823891	0.002085181	0.202285472
ZNF630	47.06483294	-0.563454468	0.183035781	-3.07838426	0.002081264	0.202285472
ADNP2	492.7813659	0.63854111	0.209175077	3.052663443	0.002268202	0.204475181
ATP4A	1.593333547	1.471177039	0.482182629	3.051078474	0.00228021	0.204475181
ATP6V1F	784.5922625	0.409322975	0.135082369	3.030173198	0.002444135	0.204475181
DSC2	447.2068138	1.269778045	0.415928496	3.052875812	0.002266597	0.204475181
FAM19A3	3.204795611	-1.406469988	0.462586676	-3.040446385	0.002362277	0.204475181
FAM83G	100.2861524	0.776666744	0.253758793	3.06064958	0.002208574	0.204475181
FDPS	1339.572454	0.579707607	0.190993269	3.035225323	0.00240356	0.204475181
FOXD4L1	3.454071032	1.335999555	0.435431889	3.068217072	0.002153401	0.204475181
FURIN	1985.331104	0.556584123	0.182004079	3.058085987	0.002227556	0.204475181
GFER	278.2018727	0.410242732	0.135241779	3.033402364	0.002418129	0.204475181
GREM1	262.6426278	-1.462732071	0.477397509	-3.063970893	0.002184202	0.204475181
HOOK2	610.3547403	0.723190877	0.237944886	3.039320947	0.002371121	0.204475181
ICT1	166.8006618	0.50232229	0.165774466	3.03015477	0.002444284	0.204475181
KANK4	49.64391732	1.414271742	0.463641791	3.050354326	0.002285715	0.204475181
KLF3-AS1	96.25624817	-1.091175013	0.357272995	-3.054177136	0.002256788	0.204475181
LGALS7B	11.68353323	1.474355237	0.485539558	3.036529593	0.002393186	0.204475181
LGMN	1490.935	0.690905886	0.22796832	3.03071008	0.002439794	0.204475181
LSM4	1021.570205	0.947924857	0.31242454	3.03409219	0.002412607	0.204475181
MBTPS2	383.9576687	-0.438222718	0.143136679	-3.061568292	0.002201808	0.204475181
METTL21B	197.4512248	-0.515392206	0.169989362	-3.03190858	0.002430128	0.204475181
MLH3	384.4745923	-0.367569853	0.121217363	-3.032320155	0.002426817	0.204475181
MROH1	626.1151667	0.666079946	0.21710627	3.067990376	0.002155036	0.204475181
NR5A2	209.9158627	-0.88742898	0.292111197	-3.037983443	0.00238167	0.204475181
NUDT14	200.6335124	0.575956874	0.189433957	3.04040988	0.002362564	0.204475181
PCDHGA7	24.08740327	-1.258204342	0.409617153	-3.071659311	0.002128725	0.204475181
PFKFB4	230.6492765	1.16126695	0.382016711	3.039832857	0.002367095	0.204475181
PLAGL2	618.0858479	0.59019104	0.194318478	3.03723581	0.002387586	0.204475181
PTPRF	6677.77974	0.835130363	0.273448869	3.054064065	0.002257639	0.204475181
SEC14L4	11.12576507	-1.223071836	0.399323943	-3.062856257	0.002192353	0.204475181
SGPL1	2168.651734	0.7863408	0.258658628	3.040071793	0.002365218	0.204475181
SSC4D	45.3374019	1.443881029	0.471943733	3.059434693	0.002217551	0.204475181
STK11IP	428.2693818	0.368661653	0.120640737	3.055863717	0.002244132	0.204475181
STK38	727.6167767	0.388431401	0.128064949	3.033081288	0.002420704	0.204475181
SUSD2	239.1799957	1.101352999	0.358705978	3.070350277	0.002138079	0.204475181
SYT17	201.7177846	1.300018511	0.42702502	3.044361455	0.002331748	0.204475181
TLL1	59.90479615	-1.225105774	0.4022835	-3.04537913	0.002323872	0.204475181
TNFAIP6	15.79102551	1.324477726	0.43206762	3.065440833	0.002173494	0.204475181
BZW2	666.3672159	0.907670358	0.299861958	3.026960687	0.002470261	0.205891264
CHRM2	6.097664267	-1.46929796	0.486159919	-3.022252356	0.002509013	0.206848109
DBNDD1	432.7732018	1.342792271	0.44420487	3.022912087	0.00250355	0.206848109
GCAT	150.2419502	0.653081117	0.215962061	3.024054853	0.002494112	0.206848109
C1QTNF6	746.5836035	1.143187703	0.37974872	3.010379345	0.002609216	0.207655182
CDH22	3.910796306	-1.426767595	0.473695128	-3.011995503	0.002595364	0.207655182
CLK1	1603.138973	-0.876961451	0.291590129	-3.007514195	0.002633938	0.207655182
HMGB3	957.0369162	1.189793634	0.394716674	3.014297882	0.002575748	0.207655182
IL17RE	102.7113831	1.019100936	0.338020988	3.014904319	0.002570603	0.207655182
LINC00669	5.823297122	1.278321505	0.423717873	3.016916646	0.0025536	0.207655182
NME1	146.2261662	0.969115276	0.322159964	3.008180354	0.002628171	0.207655182
PNRC1	1396.573555	-0.828073857	0.274404003	-3.017717846	0.002546859	0.207655182
PPP1R14B	821.7396178	1.094129225	0.362524818	3.018080886	0.00254381	0.207655182
RFXANK	626.1722138	0.653982839	0.216795413	3.01658983	0.002556355	0.207655182
SHKBP1	761.0599553	0.493176579	0.163972856	3.007672072	0.00263257	0.207655182
TRIM26	1132.782674	0.418952324	0.139183474	3.01007232	0.002611855	0.207655182
UBE2C	207.5037881	1.284092019	0.427018616	3.007110162	0.002637442	0.207655182
GPI	4008.921803	0.856698088	0.285011356	3.00583843	0.002648497	0.207806543
KIF2C	225.5522248	1.203102855	0.400685958	3.002607979	0.00267677	0.208438738
NIPSNAP3B	120.9295675	-0.739370432	0.246197031	-3.003165507	0.002671871	0.208438738
TMSB10	10403.31152	0.90639606	0.301952577	3.00178283	0.002684036	0.208438738
CIAPIN1	583.1679313	0.701875733	0.234217936	2.996677991	0.002729389	0.210523749
PSMB3	821.6505357	0.559573019	0.186717066	2.996903452	0.002727371	0.210523749
GSTO2	154.9553353	0.76293226	0.254947343	2.992509163	0.002766944	0.212699442
DTWD1	393.0628646	-0.647352539	0.216602708	-2.988663178	0.002802008	0.214551253
PSMA7	1585.308616	0.515772766	0.172626004	2.987804577	0.002809892	0.214551253
C16orf52	260.0508922	-0.590311608	0.197883466	-2.983127498	0.002853191	0.214971889
EMG1	358.0654882	0.418059923	0.14010759	2.983849209	0.00284647	0.214971889
MTX1	446.5880281	0.451844582	0.151447602	2.983504373	0.00284968	0.214971889
RIMS2	134.3906156	1.416913188	0.474842124	2.983966915	0.002845375	0.214971889
CCDC171	106.4921098	-0.721185529	0.242051258	-2.97947441	0.002887433	0.216083833
SMIM12	383.4975904	0.34381638	0.115445249	2.978176951	0.002899685	0.216083833
SOX8	17.73300143	-1.40218153	0.470923099	-2.977516993	0.002905935	0.216083833
ZNF441	157.7960779	-0.624498479	0.209526576	-2.980521561	0.00287758	0.216083833
PREPL	1121.781073	-0.319032774	0.107260745	-2.974366575	0.002935941	0.217603918
SLC5A10	42.94378714	0.818262015	0.275299727	2.972258723	0.002956175	0.217932498
TBC1D7	152.8952772	0.929667477	0.312818131	2.971910459	0.00295953	0.217932498
ARHGEF19	490.5117531	0.901460667	0.304131464	2.964049347	0.003036196	0.218892716
CCDC50	1275.430395	-0.64675307	0.217825735	-2.96913067	0.002986436	0.218892716
CIT	257.4524876	1.150318622	0.388266902	2.962700696	0.003049529	0.218892716
MARS	1317.114328	0.552476106	0.186446721	2.963184889	0.003044736	0.218892716
NCAPD2	1256.292537	0.769675307	0.259320008	2.968052145	0.002996935	0.218892716
NCAPG2	349.7884275	0.75894538	0.256008867	2.964527716	0.003031479	0.218892716
PNPO	509.1876071	0.61625798	0.207706924	2.966959257	0.003007608	0.218892716
PPFIA3	171.7038636	0.659163879	0.22230887	2.965081327	0.003026029	0.218892716
NFE2	19.51667218	1.279910674	0.432257011	2.960994596	0.003066473	0.219416765
ALDH1A2	2008.174505	-1.207516365	0.409671559	-2.947523056	0.003203309	0.22031378
ANKRD40	869.9583571	-0.549048897	0.186167761	-2.949215768	0.003185815	0.22031378
CBX2	349.2506347	1.270045983	0.430757893	2.948398636	0.003194249	0.22031378
CCDC137	350.8081887	0.550633036	0.186286338	2.955842287	0.003118165	0.22031378
ELMO3	219.6742661	0.920703206	0.312381136	2.947371333	0.003204881	0.22031378
ENPP2	3262.546997	-1.158716148	0.392454982	-2.952481692	0.003152308	0.22031378
LOC100272217	22.21953321	-0.685245432	0.231806388	-2.956111079	0.003115449	0.22031378
LYRM7	312.6924558	-0.494809308	0.167849624	-2.947932173	0.003199072	0.22031378
MRRF	261.0521951	0.377508509	0.127794557	2.954026504	0.003136571	0.22031378
SLC20A1	606.7980416	0.715625378	0.242049287	2.956527521	0.003111245	0.22031378
SLC26A9	26.43715311	1.394529154	0.472834807	2.949294619	0.003185002	0.22031378
SPG20	1235.815854	-0.513118967	0.174064186	-2.947872158	0.003199694	0.22031378
ZFX	872.4759469	-0.582223632	0.197425445	-2.949081015	0.003187204	0.22031378
ADM2	44.92867277	1.247690301	0.425494099	2.932332793	0.00336426	0.221584402
C16orf59	78.74979963	1.178047243	0.401852874	2.931538681	0.003372874	0.221584402
EHBP1	834.9406409	-0.770276953	0.262764952	-2.931429587	0.003374058	0.221584402
ILF2	2388.175253	0.609105441	0.207485657	2.935650828	0.003328488	0.221584402
NKIRAS2	699.558011	0.573644256	0.194999102	2.941778968	0.003263328	0.221584402
NUTF2	788.567086	0.592551986	0.202167202	2.930999593	0.003378732	0.221584402
OR7E91P	9.027465328	1.366408613	0.464268761	2.943141406	0.003249	0.221584402
PDCD2L	105.8866247	0.540044316	0.184255176	2.930958727	0.003379177	0.221584402
RAB6C	7.188595826	-1.426569698	0.484954126	-2.94165906	0.003264591	0.221584402
RECQL4	326.8040248	1.090305833	0.370505175	2.942754662	0.003253061	0.221584402
RIMKLA	78.12552336	1.3562897	0.461529811	2.938682765	0.003296103	0.221584402
1-Sep	113.4233364	-0.596341419	0.202786278	-2.940738519	0.003274308	0.221584402
SFRP5	34.99126374	-1.426173619	0.486512332	-2.931423366	0.003374126	0.221584402
SIRT7	249.6425059	0.465772454	0.158540311	2.937880281	0.003304646	0.221584402
SPATS2	712.1645133	0.846603603	0.288229141	2.937258881	0.003311276	0.221584402
ZC2HC1A	324.4138219	-0.606361699	0.206518023	-2.936120011	0.003323457	0.221584402
WIBG	366.5365504	0.504387484	0.172370983	2.926173971	0.00343159	0.224374696
CNP	1498.922742	0.461862633	0.157935485	2.924375306	0.003451483	0.224385861
HPCAL4	6.712801805	-1.229762209	0.420510203	-2.924452723	0.003450625	0.224385861
C12orf49	493.8326038	0.640767976	0.220228967	2.909553566	0.003619454	0.225300459
C17orf96	107.353645	1.14519888	0.393875847	2.907512325	0.00364316	0.225300459
CCDC134	74.00509318	0.624177202	0.213963696	2.917210788	0.00353177	0.225300459
CLDN4	3475.832367	1.108943331	0.380990829	2.910682477	0.003606403	0.225300459
COMMD7	425.5809192	0.288634264	0.098986159	2.915905277	0.003546582	0.225300459
CYP7B1	38.74374077	-1.016151488	0.349123665	-2.910577511	0.003607615	0.225300459
DCT	3.222996306	-1.408794987	0.484535871	-2.907514324	0.003643137	0.225300459
DYRK1B	515.6678529	0.51602151	0.17684418	2.917944541	0.00352347	0.225300459
LIMK1	674.0005839	0.659022119	0.226543517	2.909031029	0.003625509	0.225300459
LOC100507557	46.56760492	-0.843175198	0.288592973	-2.921676124	0.003481534	0.225300459
LOC100631378	7.797330946	-1.085963048	0.373376315	-2.908494741	0.003631733	0.225300459
NUP210	1030.428542	0.943919223	0.324749158	2.906610223	0.003653682	0.225300459
PLA2G4C	180.702243	-0.90742722	0.31211738	-2.907326789	0.003645322	0.225300459
RCC1	899.2365656	0.88432387	0.303383105	2.914875142	0.003558309	0.225300459
SLC25A22	384.3046199	0.706024365	0.241854026	2.919216919	0.003509119	0.225300459
TMEM132C	198.7808765	-1.396455867	0.478642507	-2.917534167	0.00352811	0.225300459
TMEM8A	1242.894963	0.948876287	0.325529072	2.914874182	0.00355832	0.225300459
WSB2	783.1355626	0.635416109	0.218252558	2.911379894	0.003598362	0.225300459
ZBTB7B	774.3964219	0.616151048	0.211616595	2.911638604	0.003595384	0.225300459
SMARCD1	1051.216413	0.548495219	0.188873779	2.904030518	0.003683922	0.226551277
NMT1	1423.115418	0.265553459	0.091472499	2.903096156	0.003694932	0.226615839
HMGA1	1614.949589	1.166830162	0.402260392	2.900683703	0.003723495	0.227753786
CARS	627.3889684	0.43323416	0.149584599	2.896248439	0.003776533	0.228063692
GPN1	526.311824	0.359038	0.123942699	2.896806369	0.003769824	0.228063692
PIP5K1A	932.9577737	0.222573188	0.076821825	2.897265039	0.003764316	0.228063692
SMARCD2	1171.939495	0.552920088	0.190920807	2.89607035	0.003778677	0.228063692
UBE2S	308.949911	0.857679095	0.295822182	2.899306235	0.003739894	0.228063692
CHEK2	173.3808272	0.738852072	0.255800124	2.888396068	0.00387212	0.228725526
COX6B1	1406.900304	0.560965888	0.194015653	2.891343445	0.003835987	0.228725526
DBI	837.9119162	0.776772046	0.269273048	2.88470031	0.003917864	0.228725526
F10	172.4246959	-1.298938805	0.449485184	-2.889836754	0.003854419	0.228725526
GCFC2	301.2719309	-0.419440282	0.144936379	-2.893961369	0.00380415	0.228725526
LSR	1421.717915	0.946616061	0.327843605	2.887401328	0.003884384	0.228725526
MARK2	980.4767201	0.430657271	0.148845255	2.893322129	0.003811901	0.228725526
PA2G4P4	3.651366014	-1.217491322	0.422031331	-2.884836343	0.003916172	0.228725526
PIK3R3	1516.565374	0.817386084	0.283227753	2.885967475	0.003902125	0.228725526
PKDCC	1029.394292	-0.872054432	0.302323977	-2.88450304	0.00392032	0.228725526
SEC62	2509.354849	-0.479632843	0.166018111	-2.889039277	0.003864208	0.228725526
UNC80	25.71976062	-1.347496686	0.467089199	-2.884880849	0.003915618	0.228725526
ZNF658	59.74908231	-0.722401225	0.249863444	-2.891184136	0.003837932	0.228725526
S100P	14.10509582	1.18030631	0.409355261	2.883330015	0.00393495	0.228991925
CXCL10	496.43704	1.349318874	0.468577538	2.879606393	0.003981719	0.229058313
FBXL19	514.3543712	0.605701229	0.210312699	2.880003112	0.003976712	0.229058313
FRMD5	14.12676816	1.400359256	0.486155994	2.880473082	0.003970789	0.229058313
GINM1	523.1978713	-0.538994733	0.187252469	-2.878438596	0.003996491	0.229058313
KIF1A	581.5281509	1.399421014	0.4861346	2.878669844	0.003993562	0.229058313
TMEM206	141.4261017	0.777474721	0.269881904	2.880796036	0.003966722	0.229058313
ZWINT	484.0556499	1.228593816	0.427069594	2.876800016	0.004017301	0.229672533
PPP4C	954.4259369	0.576815901	0.200577601	2.875774257	0.004030378	0.229842684
IL6ST	3435.212623	-0.679803569	0.236557264	-2.873737876	0.004056455	0.230751429
ANKS1B	50.97016288	-0.918025836	0.32151961	-2.855271673	0.004300003	0.231465082
C14orf80	153.6365515	0.821119307	0.288293757	2.848203566	0.004396679	0.231465082
C1orf112	131.5483575	0.569926085	0.199465129	2.857271786	0.004272998	0.231465082
CCDC167	176.3982324	0.872844765	0.305016909	2.861627467	0.00421472	0.231465082
CELF2-AS1	5.289577637	-1.220653032	0.427330644	-2.856460331	0.004283935	0.231465082
CHAC2	23.64833384	1.0705605	0.373916106	2.863103464	0.004195136	0.231465082
CHCHD5	187.8870524	0.516582944	0.181595132	2.844695991	0.004445383	0.231465082
CKMT1B	16.33630836	1.373131725	0.479319152	2.864754559	0.004173326	0.231465082
DAZAP1	1091.140266	0.608468469	0.213859541	2.845178033	0.004438661	0.231465082
DHCR24	1453.511246	1.176459988	0.412442504	2.852421794	0.004338749	0.231465082
DPP3	978.9658241	0.990357183	0.347031564	2.85379569	0.00432003	0.231465082
EMC1	1143.900927	0.346381988	0.121026991	2.862022633	0.004209468	0.231465082
ENAM	7.846846827	-1.384288739	0.486350767	-2.846276461	0.004423377	0.231465082
EPPK1	205.218861	1.29721213	0.455498052	2.847898307	0.004400898	0.231465082
FAM83H	720.3231692	1.208685566	0.422268463	2.862362862	0.004204952	0.231465082
FIRRE	19.65142609	1.378260507	0.483902228	2.848221041	0.004396438	0.231465082
FLRT2	537.1907698	-1.107665834	0.385796602	-2.871113503	0.004090286	0.231465082
GINS4	141.2077189	1.042803653	0.36626263	2.847147282	0.004411295	0.231465082
GZMM	27.02447136	-0.774899243	0.272157479	-2.847245817	0.00440993	0.231465082
HMOX2	630.8233152	0.453467234	0.158609282	2.85902079	0.004249509	0.231465082
IDH2	2406.705565	1.13278834	0.394662698	2.870269586	0.00410122	0.231465082
KRT81	12.97635838	1.320737725	0.462373193	2.856432306	0.004284314	0.231465082
LINC00092	25.42764647	-1.203045289	0.421144529	-2.85660909	0.004281928	0.231465082
LRCOL1	8.479025136	-1.308443567	0.456953222	-2.863408121	0.004191103	0.231465082
MTHFD1	888.4510969	0.582518673	0.203057222	2.868741466	0.004121085	0.231465082
NAP1L5	105.8981338	-0.895608017	0.31321812	-2.859374853	0.004244769	0.231465082
NAT10	903.2820989	0.242287687	0.085144786	2.845596281	0.004432836	0.231465082
10-Sep	767.8401969	-0.535287999	0.186847541	-2.864838347	0.004172222	0.231465082
SLC2A4	94.46098651	-1.385627283	0.485286586	-2.855276287	0.00429994	0.231465082
SMARCA4	3051.022445	0.939988112	0.328116623	2.864798816	0.004172743	0.231465082
STRIP2	25.75230372	0.877061279	0.307182357	2.855181157	0.004301229	0.231465082
TALDO1	1979.476194	0.743342904	0.260681699	2.851534676	0.004350874	0.231465082
TIMELESS	704.9409113	0.894961027	0.313635969	2.853502517	0.004324019	0.231465082
TMEM102	118.3843934	0.94951769	0.33291943	2.852094543	0.004343218	0.231465082
TP53I11	915.5535777	0.639837818	0.223881458	2.857931259	0.004264128	0.231465082
TRIM23	283.6644407	-0.759054577	0.265549046	-2.858434589	0.004257369	0.231465082
ZRANB2	1245.871762	-0.531839998	0.18656882	-2.850637092	0.004363174	0.231465082
3-Sep	23.33517334	1.03698069	0.364625604	2.843960153	0.004455662	0.231470622
GNG11	673.0364205	-1.078357859	0.379583009	-2.840901289	0.004498623	0.232071905
GPT2	952.0186267	1.202313757	0.423315804	2.840228844	0.004508118	0.232071905
IFI27	3329.224767	1.173481563	0.413098778	2.840680309	0.004501742	0.232071905
TPST1	356.190389	-0.730529968	0.257272894	-2.839513938	0.004518232	0.232071905
ZYG11A	7.198516807	1.338132958	0.471146492	2.840163263	0.004509045	0.232071905
ASNA1	941.4674038	0.407866315	0.143850547	2.83534767	0.004577584	0.232132852
BRINP2	21.80558605	-1.360023348	0.48080362	-2.828646233	0.004674534	0.232132852
CH25H	78.2592989	-1.147534458	0.404903069	-2.834096719	0.004595542	0.232132852
CSNK1G2	1045.006188	0.47237111	0.167021807	2.828200215	0.004681052	0.232132852
E2F5	133.8656201	0.8915583	0.315054767	2.829851802	0.004656957	0.232132852
EFTUD2	1334.922373	0.56654775	0.200172688	2.830294952	0.004650511	0.232132852
FLJ34503	5.49430667	-1.19055795	0.420246578	-2.832998559	0.004611359	0.232132852
FNDC5	81.82398544	-1.289430128	0.456176846	-2.826601436	0.004704484	0.232132852
GADD45B	2047.490327	-1.216314996	0.429876016	-2.829455356	0.00466273	0.232132852
GCA	315.9320777	0.671968426	0.237046346	2.834755465	0.004586077	0.232132852
IL17D	62.03358758	-0.786417199	0.278626152	-2.822481639	0.004765355	0.232132852
ITGA9-AS1	64.16467041	-0.868166262	0.3075062	-2.823247991	0.004753978	0.232132852
MAP2K6	510.2645836	1.153733447	0.408652508	2.823262858	0.004753758	0.232132852
MCRS1	960.0498742	0.508252648	0.179876472	2.82556491	0.004719732	0.232132852
MRPL15	513.8101688	0.726562881	0.256111781	2.836897542	0.004555423	0.232132852
PDE5A	689.5424356	-1.072664147	0.378713323	-2.832390841	0.004620134	0.232132852
PGD	2096.556734	0.978803695	0.34578653	2.830658832	0.004645224	0.232132852
PHKG2	389.2400917	0.426408245	0.150437695	2.834450803	0.004590453	0.232132852
PROSER1	728.4798179	0.649825684	0.230201598	2.822854797	0.004759812	0.232132852
RPLP0P2	10.3959371	1.175756459	0.416419499	2.823490406	0.004750385	0.232132852
S1PR3	607.4377667	-0.786076273	0.27818914	-2.825690008	0.00471789	0.232132852
SHMT2	1366.822338	0.880972922	0.311192564	2.830957499	0.004640889	0.232132852
SRA1	414.5584309	0.473107745	0.167564738	2.823432598	0.004751242	0.232132852
UFD1L	623.1198751	0.386019144	0.136670904	2.824442756	0.004736291	0.232132852
USHBP1	155.1972015	-1.092724744	0.387234374	-2.821869178	0.004774465	0.232132852
SH3BGRL3	1059.965158	0.620289976	0.219898417	2.820802367	0.004790371	0.23228161
ZCCHC11	790.5189721	-0.305664137	0.108380173	-2.820295707	0.004797941	0.23228161
ADAMTS14	75.26264287	1.2252518	0.435178799	2.815513535	0.004869935	0.232823026
ALG1	249.1692262	0.488770035	0.173853967	2.811382693	0.004932907	0.232823026
BLOC1S6	870.7099544	-0.325987756	0.116250825	-2.804175855	0.005044538	0.232823026
CCL19	35.78274583	-1.206004797	0.43088227	-2.798919523	0.005127391	0.232823026
CDH3	1529.235123	1.043870622	0.37150855	2.809815873	0.004956985	0.232823026
CEP85	234.2372414	0.679888952	0.242164473	2.80755035	0.004991988	0.232823026
E2F1	146.8536026	1.101689522	0.393384055	2.800544424	0.005101649	0.232823026
FAM175A	216.3487987	-0.855745452	0.304227943	-2.812843044	0.004910561	0.232823026
FLJ10038	166.5730105	-0.72024056	0.256486033	-2.808108314	0.004983346	0.232823026
GABRQ	13.5244942	-1.364019267	0.486478501	-2.803863406	0.005049429	0.232823026
GARS	921.2023854	0.466786223	0.166477356	2.803902191	0.005048822	0.232823026
GSTM5	274.2597591	-1.345863504	0.480897181	-2.798651265	0.005131653	0.232823026
INPP5J	137.8887327	0.557535007	0.199076629	2.800605023	0.005100691	0.232823026
LINC00491	10.12295156	1.327913075	0.474596764	2.797981731	0.005142302	0.232823026
LINC01560	72.08125262	-0.688276858	0.24570828	-2.801195214	0.005091371	0.232823026
MAD2L2	302.1585843	0.613378521	0.2182858	2.80997904	0.004954473	0.232823026
MAPKAPK3	473.8385705	0.409196492	0.145782255	2.806901936	0.005002047	0.232823026
MRPL50	284.5197939	0.396561645	0.140974316	2.813006346	0.004908068	0.232823026
MYD88	775.9337083	0.624018027	0.22215287	2.808957755	0.004970217	0.232823026
MYH15	8.846560161	1.16714723	0.416661638	2.801187159	0.005091498	0.232823026
NRCAM	626.3885172	1.218657649	0.43380123	2.809253556	0.004965652	0.232823026
OSBPL1A	850.2183899	-0.85066265	0.301886717	-2.817820736	0.00483508	0.232823026
PCMTD2	1196.298564	-0.436067474	0.155915813	-2.796813644	0.005160929	0.232823026
PLCXD2	12.15086895	1.130338646	0.403172485	2.80361058	0.00505339	0.232823026
POLR3K	199.2285036	0.457220626	0.162893926	2.80686112	0.00500268	0.232823026
PROSER2	260.597601	1.154551539	0.411368893	2.80660876	0.005006601	0.232823026
PTPRT	26.13788583	-1.35342497	0.480701937	-2.815518031	0.004869866	0.232823026
RRP1	476.4893623	0.347163693	0.124168684	2.795903779	0.005175481	0.232823026
SYNDIG1	47.4913535	-1.185885211	0.423226943	-2.802007835	0.005078564	0.232823026
TMEM200A	728.6126242	-1.083688988	0.386200725	-2.806025257	0.005015676	0.232823026
TMEM205	1304.254115	0.656055797	0.234433869	2.798468502	0.005134558	0.232823026
TOP3A	345.3140992	0.387548129	0.138284259	2.802546961	0.005070083	0.232823026
WNT11	148.5931579	1.304797941	0.46666713	2.795992813	0.005174055	0.232823026
ZFP36	13841.34533	-1.339128922	0.478342112	-2.799521278	0.005117844	0.232823026
ZNF32-AS2	16.68670918	-0.933907611	0.332437778	-2.809270408	0.004965392	0.232823026
ZNF707	201.0559838	0.481217202	0.172122777	2.795778752	0.005177483	0.232823026
EZH2	235.8215233	1.028472562	0.367998789	2.794771591	0.00519364	0.233088904
ADGRG1	2144.359562	0.97288029	0.348486899	2.791727016	0.005242757	0.233586589
ADRA2A	392.5514837	-0.938545182	0.335994751	-2.793332869	0.005216798	0.233586589
KCNAB1	95.88038456	-1.012838274	0.362824238	-2.791539724	0.005245792	0.233586589
RCC2	3376.59144	0.838837333	0.300443915	2.79199309	0.005238447	0.233586589
MASTL	186.8337052	0.585603766	0.209847486	2.790616062	0.005260784	0.233796618
CENPH	94.30154701	0.876618584	0.314348278	2.788685815	0.005292238	0.234166019
DDIAS	94.87489323	1.016975403	0.364740936	2.788212953	0.005299969	0.234166019
LPAR1	401.4725769	-0.640264744	0.229601597	-2.788590111	0.005293802	0.234166019
SS18L2	155.3307126	0.414683115	0.148764517	2.787513599	0.005311422	0.234217263
BOP1	576.6144784	0.787828606	0.283098801	2.782875102	0.005387954	0.235764447
LRRC70	29.97673198	-1.085341442	0.390004565	-2.782894198	0.005387637	0.235764447
PHF24	11.47765471	-1.196311889	0.42974509	-2.783770932	0.005373097	0.235764447
SLC44A2	2268.646157	0.479690637	0.172280269	2.784362015	0.005363314	0.235764447
HCFC2	320.0202201	-0.79659218	0.286317478	-2.782198926	0.005399193	0.235802781
TACC3	449.6816868	1.028661	0.369855148	2.7812537	0.00541494	0.236037452
PCDHA4	94.87946859	1.350734873	0.485775317	2.780575352	0.005426267	0.236078907
SHCBP1	99.43706541	1.068031212	0.38421907	2.779745449	0.005440152	0.23623135
ANKRD24	30.76276613	-0.958026432	0.346017465	-2.768722765	0.00562765	0.236509386
AP2S1	745.0866408	0.725085435	0.262017111	2.76732093	0.005651909	0.236509386
AXIN1	653.4208049	0.43837349	0.158442915	2.76675982	0.005661645	0.236509386
BABAM1	956.7918298	0.444733242	0.160940336	2.763342325	0.005721273	0.236509386
C17orf62	945.8921498	0.442981669	0.160268342	2.763999829	0.005709757	0.236509386
CARM1	1198.217589	0.558255322	0.201209286	2.77450078	0.00552865	0.236509386
COLQ	80.81521279	-0.703760556	0.254177782	-2.768772906	0.005626784	0.236509386
DCSTAMP	4.035147833	1.307717907	0.471224987	2.775145508	0.005517702	0.236509386
GMIP	406.1548796	0.883816825	0.318118269	2.778264918	0.005465004	0.236509386
HOMER3	335.7841139	0.70872829	0.256595302	2.762047021	0.005744021	0.236509386
KIFC1	292.5510459	1.120604282	0.405458876	2.763792703	0.005713382	0.236509386
LINC00595	2.198512903	-1.300274038	0.468668671	-2.774399313	0.005530375	0.236509386
LINC00963	322.3152735	-0.342142204	0.123285226	-2.775208467	0.005516633	0.236509386
LSAMP	107.5831345	-1.263844038	0.456441582	-2.768906444	0.005624478	0.236509386
MEF2A	1270.878776	-0.710958516	0.256765522	-2.768901807	0.005624558	0.236509386
NDUFS2	1355.625066	0.377039254	0.135961368	2.7731352	0.005551905	0.236509386
PKD1L1	28.18735662	1.292437843	0.467001547	2.767523686	0.005648394	0.236509386
PKP3	503.2903505	1.087350846	0.39147259	2.777591266	0.005476346	0.236509386
PPIA	8667.582497	0.60486545	0.218949205	2.762583451	0.00573459	0.236509386
PRR11	211.0753058	1.019662152	0.36919913	2.761821652	0.005747987	0.236509386
PRSS35	17.84365889	-1.268405132	0.456862758	-2.776337334	0.005497514	0.236509386
PWP2	470.1675027	0.34558117	0.125104556	2.762338806	0.005738889	0.236509386
RELT	146.6944878	0.8812497	0.318840563	2.763919659	0.00571116	0.236509386
SLC16A7	155.2945498	-1.114313671	0.402904604	-2.765701012	0.005680059	0.236509386
SNAP91	18.04712793	-1.23149634	0.445585305	-2.763772336	0.005713739	0.236509386
ST14	2644.853091	1.119083228	0.404466862	2.766810669	0.005660762	0.236509386
TKT	3634.416381	0.862733803	0.31200593	2.765119893	0.005690188	0.236509386
TONSL-AS1	5.03302416	1.201260694	0.434049274	2.767567572	0.005647634	0.236509386
VCP	5391.931855	0.492975255	0.177574776	2.77615586	0.005500583	0.236509386
ABHD16A	1016.439589	0.322040907	0.117547673	2.73966211	0.006150238	0.236935358
ADCK5	195.3513181	0.435242651	0.158298891	2.749499059	0.005968643	0.236935358
ANO4	205.9156225	-1.238504814	0.453708625	-2.729736105	0.006338504	0.236935358
ANO9	272.8414028	0.865544675	0.31660819	2.733803806	0.006260734	0.236935358
AP4S1	156.3031082	-0.644365262	0.236093801	-2.72927649	0.006347346	0.236935358
ARHGAP28	105.4810981	-1.096995311	0.39979052	-2.743925269	0.006070936	0.236935358
C19orf26	23.11000473	1.056695337	0.385403116	2.741792407	0.006110495	0.236935358
C20orf196	90.76449334	0.620242693	0.228266327	2.717188742	0.006583905	0.236935358
CASC4	1953.480589	-0.330068405	0.120581469	-2.737306222	0.00619446	0.236935358
CBLC	179.1566834	1.203802514	0.440095012	2.735324151	0.006231887	0.236935358
CDH4	17.49306137	-1.231348519	0.450569464	-2.732871659	0.006278479	0.236935358
CDNF	25.62899717	-0.762361193	0.277015528	-2.752052197	0.005922308	0.236935358
CENPO	138.0837333	0.837223757	0.304557567	2.748983604	0.005978038	0.236935358
CGGBP1	1582.803756	-0.367717729	0.135358805	-2.716614777	0.006595332	0.236935358
DLC1	854.5478002	-0.717062122	0.261144574	-2.745843467	0.006035555	0.236935358
DNM2	2135.221473	0.454898019	0.167349901	2.718244924	0.006562924	0.236935358
E2F2	71.91146446	1.211834298	0.44003765	2.753933211	0.005888378	0.236935358
ECM2	464.1931773	-1.232639312	0.44686995	-2.758384875	0.005808776	0.236935358
EXO1	92.03726792	1.178854188	0.429393786	2.745391823	0.006043869	0.236935358
F12	36.51769333	1.31233319	0.475640936	2.759083775	0.005796367	0.236935358
F7	13.10177494	-1.277876414	0.4682267	-2.72918314	0.006349143	0.236935358
FAM118B	262.2291099	0.459999676	0.168776715	2.725492527	0.006420563	0.236935358
FAM172A	446.1836115	-0.51509956	0.188767515	-2.728751077	0.006357467	0.236935358
FEM1B	1245.829903	-0.544743236	0.199081964	-2.736276176	0.006213885	0.236935358
GALNT2	1708.018172	0.381179202	0.139406319	2.734303625	0.006251237	0.236935358
GS1-259H13.2	13.60040348	-1.058288343	0.388426837	-2.724550011	0.006438918	0.236935358
HAUS8	123.6091815	0.807408665	0.293303028	2.752813945	0.005908546	0.236935358
HJURP	127.8645588	1.175169936	0.430355373	2.730696557	0.006320063	0.236935358
IGFBP2	4142.798954	1.17199312	0.429156593	2.730921858	0.006315744	0.236935358
JUP	3643.371253	0.733743995	0.266995019	2.748156117	0.005993147	0.236935358
KDM4A	1048.493745	0.546613425	0.198492961	2.753817674	0.005890457	0.236935358
KIFC2	287.8439061	0.776078376	0.28386467	2.733973113	0.006257515	0.236935358
KLHDC2	722.6484697	-0.418819182	0.153464924	-2.729087348	0.006350988	0.236935358
KRCC1	468.6946884	-0.374882776	0.137585963	-2.724716734	0.006435668	0.236935358
LAPTM4A	6229.403483	-0.439003401	0.160990207	-2.726895059	0.006393337	0.236935358
LGALS3BP	7514.620655	0.557718033	0.203486183	2.740815247	0.006128696	0.236935358
LINC00634	2.386335297	1.225177546	0.450565928	2.71919706	0.006544061	0.236935358
LINC00908	107.3074334	-0.838656193	0.307796012	-2.724714291	0.006435715	0.236935358
LNP1	55.74581065	-0.828738803	0.304201259	-2.724310886	0.006443582	0.236935358
LOC100130691	33.67539366	-0.569441875	0.208263211	-2.734241307	0.00625242	0.236935358
LOC100507283	16.77023207	-0.8449717	0.310467619	-2.721609754	0.006496481	0.236935358
MAD2L1BP	221.9593585	0.384920228	0.140030737	2.748826705	0.0059809	0.236935358
MAGEL2	46.73822849	-1.216538629	0.447953601	-2.715769282	0.006612198	0.236935358
MAP4K3	589.0539143	-0.328277174	0.119307444	-2.75152299	0.005931886	0.236935358
MSRB1	306.4775361	0.668894542	0.242335852	2.760196389	0.005776662	0.236935358
NAF1	190.6264472	-0.3065743	0.112676197	-2.720843511	0.006511558	0.236935358
NEIL3	19.78897472	1.185143356	0.435743548	2.719818481	0.006531776	0.236935358
OLFML3	1848.184803	-1.019346204	0.371633785	-2.742878187	0.006090327	0.236935358
PAK4	1066.99377	0.530510941	0.195141011	2.718603016	0.006555824	0.236935358
PIGQ	814.1117804	0.496670555	0.182527238	2.72107638	0.006506972	0.236935358
PITX1	103.3014586	1.321827856	0.482586421	2.739049006	0.006161719	0.236935358
PKMYT1	114.4706827	1.211353168	0.443857615	2.729148107	0.006349818	0.236935358
PLEKHG6	83.37868828	1.108772614	0.407049053	2.723928742	0.006451042	0.236935358
PP14571	17.48111064	1.231044289	0.449693895	2.737516127	0.006190508	0.236935358
PPP5C	972.1900594	0.379620688	0.139094963	2.729219516	0.006348443	0.236935358
PRIMPOL	150.7597634	-0.44925459	0.165113934	-2.720876303	0.006510912	0.236935358
PRLHR	50.42945937	-1.308283111	0.474865274	-2.755061665	0.005868107	0.236935358
PSMD8	1464.933883	0.506842701	0.184883217	2.741420827	0.00611741	0.236935358
PTGES2	648.9734662	0.528651434	0.193928453	2.726012735	0.006410452	0.236935358
RBFOX1	5.959848059	-1.299028989	0.477263379	-2.721828334	0.006492186	0.236935358
RBM20	154.0787407	-1.128913117	0.41412694	-2.726007436	0.006410555	0.236935358
SCRIB	1449.416727	0.674056953	0.245968376	2.740421208	0.006136049	0.236935358
STON2	486.4110194	1.089979685	0.395477974	2.756107183	0.005849383	0.236935358
STRN4	1540.488026	0.412906152	0.151356691	2.728033696	0.00637131	0.236935358
TCN1	41.18528072	1.317964321	0.484736308	2.718930477	0.006549337	0.236935358
TEAD4	157.9333857	0.717748858	0.261984755	2.739658866	0.006150298	0.236935358
TFPI	393.084087	-1.098622494	0.403544433	-2.722432535	0.006480326	0.236935358
TIMM8B	394.7829632	0.780550131	0.285144251	2.737386874	0.006192942	0.236935358
TK1	376.349822	1.118398868	0.411754341	2.71617991	0.006604002	0.236935358
TMEM179	9.24217939	-1.29296976	0.473736792	-2.729299858	0.006346896	0.236935358
TONSL	256.5456705	0.944728458	0.344208212	2.744642416	0.006057686	0.236935358
TRPC3	7.712744371	-1.114479315	0.406578971	-2.741114014	0.006123126	0.236935358
TSPAN14	2271.697453	0.671783532	0.24413496	2.751689196	0.005928876	0.236935358
USF1	816.3526328	0.410156234	0.150471897	2.725799586	0.006414593	0.236935358
VMA21	542.8672653	-0.295331711	0.107884673	-2.737476067	0.006191262	0.236935358
XPO6	1300.701671	0.266892211	0.096783351	2.757625223	0.005822291	0.236935358
YEATS2	1082.381578	0.47745999	0.174560918	2.735205543	0.006234133	0.236935358
YIF1B	456.7076911	0.619337433	0.22775867	2.719270508	0.006542608	0.236935358
ZBTB26	142.6429068	-0.413890293	0.15228902	-2.717794713	0.00657186	0.236935358
ZEB1-AS1	80.32180759	-0.703033944	0.257036466	-2.73515254	0.006235137	0.236935358
ZNF181	177.7430497	-0.660805072	0.241343963	-2.738021968	0.006180995	0.236935358
ZSWIM4	305.752437	0.763346133	0.27772307	2.748587411	0.005985267	0.236935358
CCDC124	692.8654536	0.50508243	0.18623106	2.712127769	0.006685282	0.237051253
CCDC88A	527.7951809	-0.457675938	0.168841945	-2.71067676	0.006714605	0.237051253
KCNH8	6.405321963	-1.13036712	0.417016783	-2.710603424	0.00671609	0.237051253
MTHFD1L	437.7503829	0.900755174	0.332329308	2.710429544	0.006719612	0.237051253
POLD1	536.2586046	0.725682166	0.267477109	2.713062697	0.006666449	0.237051253
PRDM6	34.44443426	-1.187459755	0.437704886	-2.712923234	0.006669255	0.237051253
RDH13	218.8945794	0.569326963	0.209900558	2.712365174	0.006680495	0.237051253
RNF11	1405.359162	-0.478458355	0.176343746	-2.713214194	0.006663402	0.237051253
ZNF354B	128.4577291	-0.618554317	0.227984438	-2.713142718	0.00666484	0.237051253
ZYG11B	778.5788462	-0.572352374	0.211137057	-2.710809665	0.006711914	0.237051253
LMNB2	1335.68316	0.849305718	0.313446687	2.709569928	0.00673705	0.237298514
HINT2	183.283042	0.351379239	0.129782453	2.707447982	0.00678027	0.238451705
INTS7	319.0379424	0.681805437	0.251945508	2.706162306	0.006806577	0.239007489
PPP1R15A	2515.555326	-1.064854642	0.393568809	-2.70563779	0.006817336	0.239016428
LMNB1	798.5431181	1.064756969	0.393841968	2.703513229	0.006861072	0.239726419
RRP12	716.5098235	0.632105388	0.233777969	2.703870639	0.006853697	0.239726419
SLC26A4-AS1	20.04275199	-1.309430297	0.484414409	-2.703120042	0.006869193	0.239726419
DENND5B	376.3640826	-0.570687276	0.211212333	-2.701960008	0.006893205	0.240179552
MRPL28	606.4814582	0.413592856	0.153098961	2.701473963	0.006903289	0.240179552
ALDH3B2	387.8501991	1.228038112	0.454678857	2.700891175	0.006915396	0.240233473
ANP32A	1884.689235	0.498374311	0.185073855	2.692840163	0.007084622	0.24073584
CEP85L	208.1768648	-0.726274575	0.269716078	-2.692737422	0.007086806	0.24073584
CPLX2	6.955582332	1.298935503	0.481632847	2.696941269	0.006997961	0.24073584
EIF2B5	734.6056965	0.305291672	0.113442196	2.691165032	0.007120296	0.24073584
FAM8A1	929.2511833	-0.748668152	0.277503427	-2.697869934	0.00697847	0.24073584
FCER1A	33.657884	-1.214693738	0.45087319	-2.694091739	0.007058074	0.24073584
IFI30	1548.108782	1.06447481	0.395347185	2.69250636	0.007091718	0.24073584
KPNA2	1210.398138	0.943623904	0.350448467	2.692618155	0.007089341	0.24073584
LYPD1	24.97425371	1.296141993	0.48098969	2.694739657	0.007044365	0.24073584
MTUS2	35.84652076	-1.261633981	0.467700702	-2.697524243	0.00698572	0.24073584
P2RY14	142.9483258	-1.199234711	0.444796185	-2.696144328	0.007014727	0.24073584
PTBP1	3594.370468	0.377941894	0.140354288	2.692770557	0.007086102	0.24073584
SPAG5	362.5968056	1.040197454	0.38616924	2.693631051	0.007067835	0.24073584
TROAP	194.2036961	1.200091901	0.44565078	2.692897569	0.007083403	0.24073584
TUBB2B	212.2348283	1.297517175	0.481474855	2.694880453	0.007041389	0.24073584
UNC5D	38.05683579	-1.308179036	0.485956182	-2.691969119	0.007103152	0.24073584
VRK3	506.8807767	0.470203755	0.174691508	2.691623432	0.007110518	0.24073584
ZNF404	26.0201503	-1.034216009	0.383157973	-2.699189584	0.006950857	0.24073584
AURKB	138.9962646	1.175490193	0.437201798	2.688667335	0.007173787	0.24075568
IGSF3	731.3925316	0.963788591	0.358436757	2.688866503	0.007169508	0.24075568
NOP16	225.0405383	0.587785161	0.218458637	2.690601614	0.007132331	0.24075568
RAB25	844.762647	1.03620499	0.385321244	2.689197668	0.007162399	0.24075568
RTKN2	150.0526913	1.091986977	0.406051551	2.689281627	0.007160598	0.24075568
DEPDC1B	86.40715024	1.218957578	0.453489995	2.687948115	0.007189257	0.240778156
PCYOX1	2007.984451	-0.483425129	0.179901752	-2.687161869	0.007206202	0.240778156
PNCK	58.00626447	-1.072323023	0.398999488	-2.687529823	0.007198267	0.240778156
ALDH1A1	2670.569745	-0.972210806	0.362526951	-2.681761459	0.007323566	0.241525649
FAM157A	5.134341218	1.195854258	0.445802536	2.682475226	0.007307956	0.241525649
ITM2B	9715.527586	-0.613839387	0.228630331	-2.684855441	0.007256118	0.241525649
NADK	1067.076875	0.371984919	0.13871045	2.681736813	0.007324106	0.241525649
PSMD6-AS2	18.57841374	-0.734194157	0.273401153	-2.685409882	0.007244091	0.241525649
PTRH2	201.1894774	0.253105334	0.094342977	2.682821139	0.007300402	0.241525649
SH3BP5L	662.4926589	0.337923133	0.125899396	2.684072704	0.007273129	0.241525649
SLC51A	36.93126081	1.039344449	0.387384078	2.682981847	0.007296895	0.241525649
ZIM2-AS1	8.901367837	-1.224065113	0.455949876	-2.68464842	0.007260614	0.241525649
ADAMTSL5	116.2598143	-1.263877507	0.471709074	-2.679358053	0.007376347	0.242158574
IFNLR1	108.184769	0.686988612	0.256428933	2.679060444	0.007382907	0.242158574
MTCH2	888.2122372	0.616563982	0.230029551	2.680368583	0.007354113	0.242158574
NIPBL-AS1	258.2052779	-0.548934245	0.204931596	-2.678621817	0.007392584	0.242158574
RAB15	190.1442949	0.733411573	0.273820018	2.678443956	0.007396511	0.242158574
ANK2	565.2725937	-0.809932572	0.302497531	-2.677484899	0.00741772	0.242504012
HPCA	8.874340955	-1.245534093	0.465422975	-2.676133667	0.007447694	0.242954158
NAP1L3	149.3286354	-1.177980118	0.440217961	-2.675901993	0.007452844	0.242954158
DDA1	437.0873731	0.452410394	0.169117964	2.675117323	0.00747031	0.243175164
DENND4A	452.5859472	-0.382929429	0.143264188	-2.672890103	0.007520088	0.243787511
ENPEP	450.829289	-1.068722881	0.399845787	-2.672837669	0.007521264	0.243787511
MTRR	449.9584271	-0.434167446	0.16242563	-2.67302301	0.007517109	0.243787511
AKR1B15	3.486422589	1.277537463	0.479556897	2.663995599	0.007721857	0.24409286
ARF3	3458.440411	0.480849474	0.1802323	2.667942844	0.007631724	0.24409286
C15orf62	120.8797254	1.188575806	0.445174929	2.66990733	0.007587218	0.24409286
CLIC1	2877.776932	0.439863029	0.165188645	2.662792167	0.007749526	0.24409286
DDX28	149.7609288	0.416044633	0.156260142	2.662512839	0.007755961	0.24409286
DNAJC27	142.8744375	-0.681657876	0.255637967	-2.666497013	0.007664629	0.24409286
DNTTIP1	371.137136	0.302154876	0.113435772	2.663664838	0.007729453	0.24409286
HNRNPAB	1937.813439	0.553812182	0.207882039	2.664069414	0.007720163	0.24409286
LYPLA2	1226.266301	0.859304537	0.322689426	2.662946066	0.007745983	0.24409286
MICALCL	19.8668519	1.10872646	0.416163233	2.664162453	0.007718028	0.24409286
NLRP7	26.20895055	1.22959234	0.461228992	2.665904274	0.007678155	0.24409286
PPAN	29.80236512	0.811878968	0.304159651	2.669252695	0.007602023	0.24409286
PUS1	282.9862843	0.426998821	0.159928953	2.669928204	0.007586747	0.24409286
SGTB	174.9691509	-0.613296836	0.229543872	-2.671806614	0.007544411	0.24409286
STAT3	4127.787069	0.413171226	0.155137055	2.663265879	0.007738624	0.24409286
TMEM147	555.9187057	0.506307463	0.19015899	2.662548132	0.007755148	0.24409286
TMEM220-AS1	12.23141523	-0.876121299	0.328922094	-2.663613402	0.007730635	0.24409286
TRAPPC10	856.3921249	0.281556372	0.10557871	2.666791182	0.007657924	0.24409286
TRIM62	124.7875423	0.472711293	0.176986258	2.67089263	0.007564984	0.24409286
TSFM	385.8044013	0.477168661	0.179204486	2.662704884	0.007751536	0.24409286
ZBED8	136.9581135	-0.665150095	0.249792745	-2.662807897	0.007749164	0.24409286
ORAI3	332.5187512	-0.422473569	0.158728179	-2.661616675	0.007776638	0.244405566
MRPL44	329.3443523	0.40531623	0.152363476	2.660192852	0.007809592	0.244690928
SH3BGRL	2420.428849	-0.758001706	0.284904345	-2.660548073	0.007801359	0.244690928
TMPRSS13	321.1026474	1.225380605	0.460698615	2.659831319	0.007817979	0.244690928
AKR1A1	1476.779583	0.490005898	0.18454904	2.655152784	0.00792725	0.245076951
HYMAI	3.149300011	-1.22235417	0.460162221	-2.6563549	0.007899044	0.245076951
NDUFA9	714.4308858	0.523136564	0.196975787	2.655841979	0.007911068	0.245076951
PAK1	1287.966027	0.530429401	0.199535973	2.658314654	0.007853253	0.245076951
PAPPA2	33.81389726	-1.288845126	0.485323589	-2.655640802	0.007915788	0.245076951
PDE10A	82.45850723	-0.850986211	0.320155511	-2.658040174	0.007859652	0.245076951
PHB	1682.371335	0.425985745	0.160434725	2.65519666	0.007926218	0.245076951
SMIM10L2B	67.85476963	-1.134194516	0.427006718	-2.656151456	0.007903811	0.245076951
TUBA1B	9403.884973	0.781736656	0.294388179	2.655462111	0.007919983	0.245076951
CHSY3	58.42933361	-1.083546148	0.408384681	-2.653248759	0.007972109	0.245129618
MTG1	396.8119117	0.511086584	0.192648363	2.652950572	0.007979155	0.245129618
NOP10	504.3004527	0.574940673	0.216730102	2.652795653	0.007982818	0.245129618
PPM1G	1716.255573	0.493404835	0.185950229	2.653424185	0.007967967	0.245129618
SLC38A7	417.8840391	0.748206268	0.281957746	2.653611325	0.00796355	0.245129618
ADD2	91.4379197	1.255629313	0.473428241	2.652206192	0.007996769	0.245227067
ARMC6	437.3897882	0.620554721	0.234111324	2.650682204	0.008032939	0.245554762
ARPC5L	368.178407	0.580151003	0.219471732	2.643397388	0.008207864	0.245554762
CASP6	342.6687287	0.705042026	0.266706906	2.643508702	0.008205166	0.245554762
CLIC4	4158.107964	-0.780878751	0.294737263	-2.649406263	0.008063334	0.245554762
EVPL	513.6483055	0.968911085	0.366555796	2.643284037	0.008210613	0.245554762
FLAD1	509.2403807	0.559563452	0.211205912	2.649374002	0.008064104	0.245554762
FOXC2	2.409912983	-1.281588621	0.483558545	-2.650327729	0.008041372	0.245554762
GOLGA8H	30.23682545	-0.956261208	0.361703672	-2.643769697	0.008198842	0.245554762
IGFBP4	10408.71807	-0.752914808	0.284417713	-2.647214906	0.008115776	0.245554762
KRBOX4	155.2876112	-0.565855793	0.213660905	-2.648382455	0.008087797	0.245554762
MGC72080	70.41437415	0.841165406	0.317858315	2.64635332	0.008136478	0.245554762
N4BP2L2	1027.436031	-0.488633688	0.184613413	-2.646794078	0.008125882	0.245554762
NDUFS5	1743.935454	0.385652822	0.145789874	2.645264791	0.008162701	0.245554762
NVL	323.03589	0.370030184	0.139815214	2.646565947	0.008131365	0.245554762
PDXP	181.1007269	0.403680803	0.152694955	2.643707535	0.008200348	0.245554762
SLC25A5	2450.712	0.673046116	0.254447636	2.645126232	0.008166045	0.245554762
SP3	1506.60814	-0.338853751	0.128197996	-2.64320631	0.008212498	0.245554762
ZBED4	507.791082	0.714447727	0.269622128	2.649811172	0.008053677	0.245554762
ZNF672	494.9461216	0.485847131	0.183683112	2.645028856	0.008168395	0.245554762
LINC00657	6957.699152	-0.275775987	0.104405829	-2.641384968	0.008256784	0.245909508
SSSCA1	211.7113972	0.292779576	0.110823894	2.641845229	0.008245573	0.245909508
ZNF428	238.7238299	0.53578628	0.202836571	2.641467839	0.008254764	0.245909508
AAGAB	742.9735442	0.678308835	0.257391828	2.635316129	0.008405895	0.247582438
ABCC10	533.3141123	0.377122195	0.143839421	2.621827822	0.00874596	0.247582438
ALYREF	590.1025132	0.659555076	0.251710517	2.620292083	0.008785448	0.247582438
AQP5	1303.488875	1.252641949	0.477139564	2.625315617	0.008656868	0.247582438
ARHGEF26-AS1	11.1035563	-0.93494895	0.356814136	-2.620268806	0.008786048	0.247582438
C14orf39	3.161267164	-1.258691467	0.47978408	-2.623454005	0.00870432	0.247582438
COMMD5	345.7833204	0.475184836	0.180890561	2.62691891	0.008616186	0.247582438
DDX23	2148.553321	0.328627472	0.124867745	2.631804335	0.008493276	0.247582438
DKC1	1018.286972	0.660278438	0.250970284	2.630902858	0.008515837	0.247582438
ECHS1	1724.143865	0.65027386	0.247257046	2.629950773	0.008539723	0.247582438
FLJ31356	11.65055809	-1.10897594	0.422374651	-2.625574089	0.008650298	0.247582438
GADD45A	882.5397713	-0.569132513	0.217158208	-2.620819714	0.008771864	0.247582438
GTF3C2	872.432932	0.469373209	0.178253322	2.633180707	0.008458933	0.247582438
HMBS	280.5444333	0.742249248	0.281496858	2.636794075	0.008369362	0.247582438
HOXA13	18.34754011	-1.171390024	0.447087057	-2.620049061	0.008791712	0.247582438
INCENP	500.604581	0.650355143	0.247694463	2.625634564	0.008648762	0.247582438
ISG20L2	619.7931789	0.384725418	0.146275482	2.630142887	0.008534899	0.247582438
KDM5B	1885.288771	0.613736555	0.232781274	2.636537485	0.008375695	0.247582438
LEO1	388.0783131	0.505149694	0.191450498	2.638539466	0.008326401	0.247582438
LETM1	634.1348381	0.424508377	0.161237673	2.632811361	0.008468137	0.247582438
LINC00994	2.419418987	-1.267084632	0.483303094	-2.621718435	0.008748768	0.247582438
LINC01016	30.99188678	-1.273985208	0.485554437	-2.623774205	0.008696141	0.247582438
MISP	494.0244945	1.132365667	0.429940392	2.633773632	0.008444176	0.247582438
MMP16	59.33206798	-1.091974377	0.414260785	-2.635958833	0.008389991	0.247582438
MT1F	114.2653391	1.055079367	0.401337321	2.628909177	0.008565923	0.247582438
POM121L8P	5.547372783	1.196280967	0.455902314	2.623985294	0.008690754	0.247582438
PRDX1	3443.391701	0.555616578	0.211279529	2.629770046	0.008544264	0.247582438
PSME3	1328.491775	0.512292524	0.195064426	2.626273452	0.008632544	0.247582438
PURA	502.7786769	-0.454052223	0.17278418	-2.627857614	0.008592447	0.247582438
RAB6C-AS1	5.264571155	-1.274895391	0.486323565	-2.621496224	0.008754473	0.247582438
RAET1K	9.194733041	1.144047598	0.433731114	2.637688564	0.00834732	0.247582438
RALY	2107.298192	0.402490613	0.153331627	2.624967989	0.008665711	0.247582438
RANGAP1	1432.721021	0.562270602	0.213538071	2.633116424	0.008460534	0.247582438
RBM8A	1556.172072	0.375027742	0.142366877	2.63423452	0.008432722	0.247582438
RNF34	466.9068331	0.392804146	0.149578997	2.626064854	0.008637836	0.247582438
S100A10	884.7631874	0.654181753	0.248273102	2.634928023	0.008415513	0.247582438
SERPINF2	87.8216834	0.994975608	0.377813369	2.633510854	0.008450713	0.247582438
TCERG1L	2.235269236	-1.2706288	0.481921934	-2.636586364	0.008374488	0.247582438
TGM5	8.695826316	1.278952804	0.485852424	2.632389469	0.008478661	0.247582438
TMEM119	411.284941	-1.106991714	0.421129935	-2.628622717	0.008573142	0.247582438
TPM3	3862.581176	0.694855303	0.265052309	2.621578001	0.008752373	0.247582438
UPP1	135.2552947	0.587539902	0.223464721	2.629228897	0.008557874	0.247582438
USB1	537.057078	0.533692873	0.2034459	2.623266796	0.008709104	0.247582438
ZNF83	711.0065307	-0.50037316	0.190628519	-2.624859931	0.008668462	0.247582438
ANKS1A	979.0722747	0.559014824	0.213481808	2.618559529	0.008830188	0.247985353
PDE7A	491.8707632	0.760866788	0.29060347	2.618230223	0.008838715	0.247985353
TTC33	330.3573701	-0.553835252	0.211508184	-2.618505063	0.008831598	0.247985353
DTYMK	271.7806039	0.65686393	0.251000664	2.616980846	0.008871132	0.248282577
SPOPL	470.3306363	-0.552802682	0.211227107	-2.617101039	0.008868009	0.248282577
LOC100128398	36.44090191	-0.666243662	0.254654897	-2.616260947	0.008889859	0.248492253
RASAL1	92.24887688	1.211565286	0.463236613	2.615435078	0.008911386	0.248492253
STXBP5L	40.1270593	-1.234959607	0.472169353	-2.615501407	0.008909655	0.248492253
EIF4A3	1112.977078	0.386891136	0.148066269	2.612959304	0.008976199	0.24968757
NR2F2	3083.752144	-0.876325943	0.335333355	-2.613297869	0.008967311	0.24968757
SEZ6L	8.070839717	-1.26285166	0.483444933	-2.612193395	0.008996335	0.249942124
PRELID1	282.4948724	0.515984139	0.19758814	2.611412498	0.009016906	0.250208144
APEH	1391.174395	0.588117082	0.225305854	2.610305381	0.009046143	0.250468996
PATZ1	1322.80919	0.405073667	0.15518738	2.610222998	0.009048322	0.250468996
NUP188	966.8154133	0.376731367	0.144368763	2.609507479	0.009067266	0.25058188
VDR	251.1752643	1.14984063	0.440680717	2.609237448	0.009074425	0.25058188
ANKRD12	845.1555225	-0.4281044	0.164312043	-2.605435321	0.00917576	0.25102181
CDADC1	164.9954072	-0.397237203	0.152452134	-2.605651969	0.009169958	0.25102181
DNAJB4	346.2268065	-0.801051248	0.307466466	-2.605328826	0.009178612	0.25102181
LPAR6	446.1922091	-0.681297424	0.26123678	-2.607968996	0.00910812	0.25102181
MRPS11	300.5386238	0.514309822	0.197349435	2.606087125	0.009158316	0.25102181
NIPSNAP1	1196.871433	0.835640736	0.320517064	2.607164581	0.009129547	0.25102181
PIK3R2	1483.219576	0.601676274	0.230728683	2.607722049	0.009114693	0.25102181
SNRPF	696.6999355	0.695719491	0.267000786	2.605683304	0.00916912	0.25102181
C11orf80	115.2308396	0.581171254	0.223180329	2.604043365	0.00921311	0.251060003
KBTBD6	408.7460241	-0.517933679	0.198862655	-2.604479352	0.009201397	0.251060003
MMRN1	596.7438542	-1.097142088	0.421281474	-2.604297023	0.009206293	0.251060003
NUP93	628.8484684	0.602753229	0.231641481	2.602095388	0.009265608	0.251742456
THAP2	94.52133502	-0.702177478	0.269799124	-2.602593619	0.009252155	0.251742456
ZNF280D	631.809943	-0.619643826	0.238152062	-2.601883107	0.009271345	0.251742456
PSMD9	561.5754933	0.45168899	0.173628932	2.601461556	0.009282747	0.251751636
AGPAT2	785.1276173	0.750243266	0.288587997	2.599703641	0.00933043	0.252579721
NELFCD	1195.5787	0.379319775	0.145919279	2.599517881	0.009335481	0.252579721
SORT1	1992.008015	0.678368224	0.261043932	2.598674558	0.009358445	0.252900306
EHMT1	1200.586984	0.277832304	0.107013041	2.596247165	0.009424824	0.253051561
GRIN2D	105.8409669	1.234400338	0.475301671	2.597088153	0.009401779	0.253051561
PSMB2	1246.185718	0.426670855	0.164326834	2.596477061	0.009418519	0.253051561
RPL32P3	121.7063492	-0.468520315	0.180449463	-2.596407364	0.00942043	0.253051561
TMEM164	509.0255004	0.591489659	0.227814801	2.596361853	0.009421678	0.253051561
TMEM265	230.7778162	0.6145016	0.236708159	2.596030503	0.009430769	0.253051561
PKD2	1427.038874	-0.915639731	0.352773661	-2.595544491	0.009444118	0.253111248
CARF	197.0703379	-0.614620152	0.236854131	-2.594931103	0.009460988	0.253265089
C2orf47	171.8936483	0.447287449	0.172518338	2.592695095	0.009522715	0.253723495
CTNNAL1	661.5060255	-0.501045641	0.193245434	-2.592794201	0.009519972	0.253723495
GEMIN7	146.2042278	0.598607431	0.230877261	2.592751785	0.009521146	0.253723495
HARS2	540.0648658	0.300795266	0.115992406	2.593232415	0.009507849	0.253723495
CAPN14	8.890932375	1.067972049	0.412047495	2.591866377	0.009545684	0.254038004
CREG2	2.09681561	1.256313353	0.485063397	2.589998256	0.009597642	0.254810126
DUS2	136.7804879	0.464527048	0.179380638	2.589616429	0.009608293	0.254810126
KIF18B	169.5981202	1.114454525	0.430257587	2.590203074	0.009591933	0.254810126
KCTD19	6.061723295	-1.21883378	0.470979162	-2.58787199	0.009657086	0.25543391
NCLN	963.7251182	0.526469314	0.203460718	2.587572276	0.009665492	0.25543391
QKI	1484.248382	-0.495990884	0.191636814	-2.58818164	0.009648409	0.25543391
ARL4C	700.2515068	0.936540287	0.362367895	2.584501275	0.009751994	0.256046136
CAPG	1186.932467	0.810897929	0.31376261	2.584431362	0.009753972	0.256046136
LOC646903	22.96831539	-0.693164942	0.268042158	-2.58602955	0.009708861	0.256046136
RGS5	2995.957893	-1.127843864	0.436224333	-2.585467564	0.009724702	0.256046136
TMEM211	19.11676557	1.238684132	0.479301358	2.584353481	0.009756175	0.256046136
WFIKKN2	59.75147467	-1.253583448	0.484946197	-2.584994902	0.009738044	0.256046136
CCT3	3786.696952	0.545638108	0.211203659	2.583469005	0.009781226	0.256399282
RHBDF2	294.5335991	0.660985372	0.255890071	2.583083313	0.009792167	0.256399282
GLT1D1	58.64463226	-1.101711706	0.42675212	-2.581619763	0.009833786	0.256729
HEATR4	16.51950851	-0.782490615	0.303156099	-2.581147527	0.009847249	0.256729
PLEKHJ1	536.4403047	0.704335583	0.272886708	2.581054926	0.009849891	0.256729
SEC24C	2390.051628	0.370041748	0.143324399	2.581847544	0.009827299	0.256729
TMEM178B	53.4671968	-1.186104355	0.459662335	-2.580381868	0.009869112	0.256935657
ATAD2	406.9620584	0.812954659	0.315172306	2.579397501	0.009897283	0.257076049
FAM83D	111.4589733	1.100643202	0.42697578	2.577764953	0.009944161	0.257076049
GRIP1	228.1147708	0.971140951	0.376709777	2.577955257	0.009938687	0.257076049
OGN	969.1374896	-1.249605681	0.484668367	-2.578269527	0.009929651	0.257076049
PIGC	485.2919419	0.300469177	0.116546273	2.578110553	0.009934221	0.257076049
PJA2	2543.988621	-0.564941129	0.218991908	-2.579735186	0.00988761	0.257076049
TTC14	518.7651641	-0.646164725	0.250700452	-2.577437412	0.009953591	0.257076049
ANAPC11	618.4980301	0.571286414	0.221717764	2.576637987	0.009976638	0.25708767
C17orf58	202.8098052	-0.65099539	0.252647665	-2.576692682	0.009975059	0.25708767
EPM2AIP1	689.4079269	-0.55897803	0.217010635	-2.575809386	0.010000576	0.257413017
TCF3	1750.24783	0.698726472	0.271400834	2.57451852	0.010037971	0.258083613
POMT2	369.5485234	0.345160591	0.134104587	2.573816447	0.010058362	0.258315989
RNF183	210.8913615	1.193320015	0.463714634	2.57339305	0.010070677	0.258340673
C19orf70	426.6009971	0.334853006	0.130156577	2.572693705	0.010091047	0.258571714
DERA	370.5849347	0.434679925	0.169068839	2.571023304	0.01013985	0.259529983
AP1S1	535.4609306	0.659208966	0.256968004	2.565334812	0.010307629	0.259551153
BCL2L11	533.032941	0.666461189	0.259864474	2.564649097	0.01032802	0.259551153
BUB1B	242.5463777	1.12218451	0.436922243	2.568384941	0.010217362	0.259551153
DOHH	160.1365118	0.543138967	0.211725858	2.565293502	0.010308856	0.259551153
DUSP15	20.06902908	-1.01849459	0.396255435	-2.570298097	0.010161104	0.259551153
FAM49B	512.805617	0.649735722	0.252951015	2.568622714	0.010210355	0.259551153
KRT6A	31.85523663	1.16262214	0.452810268	2.567570177	0.010241406	0.259551153
LOC100128885	8.408315483	1.244189806	0.485172394	2.564428275	0.010334594	0.259551153
LOC284798	1.241489804	-1.232752824	0.480111695	-2.567637564	0.010239415	0.259551153
LPCAT1	752.5976234	0.460914788	0.179677141	2.565238877	0.010310479	0.259551153
LSM12	674.0643884	0.467320783	0.182071344	2.566690473	0.010267422	0.259551153
MAGI2	108.6787357	-0.937554836	0.365453204	-2.565457973	0.01030397	0.259551153
NUDT7	62.7809124	-0.764459493	0.297726652	-2.567655562	0.010238884	0.259551153
PTCSC3	2.88617879	-1.138789021	0.444030529	-2.564663795	0.010327582	0.259551153
RHOT2	1287.540286	0.361620681	0.140722215	2.569748357	0.010177241	0.259551153
TSPO	928.2220656	0.65622901	0.255737151	2.566029257	0.010287015	0.259551153
UBE2QL1	46.83273757	-1.149352711	0.44771265	-2.567166043	0.01025335	0.259551153
KNOP1	257.5654334	0.578227555	0.225603065	2.563030586	0.010376291	0.260311046
HEBP1	341.7134372	-0.651433953	0.254303101	-2.561643766	0.010417811	0.260874737
MKLN1	1109.836439	-0.404169388	0.157808854	-2.561132521	0.010433155	0.260874737
MYEOV2	371.9601096	0.444885875	0.17369289	2.561336122	0.010427042	0.260874737
CDC42EP5	101.1042843	-0.915750578	0.357610752	-2.560746768	0.010444746	0.260877875
AURKAIP1	594.4582312	0.433158129	0.169220938	2.559719473	0.010475669	0.261066105
ERBB2	3057.554212	0.765124382	0.29901031	2.558856185	0.010501718	0.261066105
ETV4	211.811918	1.192010671	0.465779893	2.559171593	0.010492194	0.261066105
GET4	515.8824526	0.422030785	0.164970847	2.558214333	0.010521122	0.261066105
ORC1	84.63652799	1.074992281	0.420107065	2.558853138	0.01050181	0.261066105
SH3BP4	1422.798836	0.694017966	0.271288168	2.558231603	0.0105206	0.261066105
FAM64A	74.20499213	1.105515798	0.432409763	2.55663931	0.010568874	0.261257223
GAD1	327.5891826	1.223813545	0.478716781	2.556445884	0.010574752	0.261257223
NDNF	234.6329034	-1.113249036	0.435361334	-2.557069151	0.010555823	0.261257223
TRIM52	138.5917996	-0.443835172	0.173540996	-2.557523485	0.010542044	0.261257223
BCL2L12	305.8988358	0.746647357	0.292280676	2.554556011	0.010632332	0.262019831
ESPL1	196.7566542	1.102966896	0.431720307	2.554818195	0.010624327	0.262019831
SSPN	753.5443977	-0.99141231	0.388134698	-2.554299616	0.010640165	0.262019831
ZNF581	333.3471565	0.720951026	0.282478694	2.552231516	0.010703537	0.263295435
CHAF1A	357.0233825	0.828020775	0.324687553	2.550207942	0.010765868	0.264418784
CNPY2	1334.274084	0.668370861	0.262106729	2.549995046	0.010772445	0.264418784
PPP1CA	1492.224067	0.633913192	0.248659726	2.549319915	0.010793324	0.264645788
ARID3B	167.2250912	0.541308852	0.212482597	2.547544414	0.010848404	0.265139196
LOC101927636	2.110462088	-1.233681227	0.484182442	-2.547967707	0.01083525	0.265139196
PABPC5	49.07281414	-1.072536631	0.420981993	-2.547701921	0.010843508	0.265139196
MFI2-AS1	30.46426925	-0.850776924	0.334040544	-2.546927127	0.010867612	0.265323663
IMMT	1068.762799	0.437231697	0.171727361	2.546080564	0.010894004	0.265398473
MTMR1	469.285605	0.352065606	0.138266686	2.546279337	0.010887802	0.265398473
CLCNKA	19.26482419	-1.08549506	0.426471146	-2.545295433	0.010918532	0.265603325
UBALD2	408.3116105	0.575759148	0.226238086	2.54492582	0.010930095	0.265603325
ZDHHC13	334.1126609	0.74820627	0.294026315	2.544691518	0.010937431	0.265603325
TLE6	47.04349903	0.907491482	0.356914514	2.54260179	0.011003055	0.266912054
LINC01116	92.85418256	-1.182040455	0.464983734	-2.542111408	0.011018505	0.267002188
LOC101927318	116.9509646	1.202518575	0.473191919	2.541291442	0.011044381	0.267060421
SEMA3A	222.5586566	1.216913525	0.478786675	2.54166122	0.011032705	0.267060421
CSPG5	23.00749828	1.089274173	0.428925297	2.539542853	0.011099745	0.267419798
PSMD3	1604.58528	0.420561503	0.165580357	2.539923886	0.01108766	0.267419798
RBM43	302.1446259	-0.629959173	0.24804419	-2.539705416	0.011094587	0.267419798
UBAP2	662.5706863	0.447104584	0.176071333	2.539337764	0.011106254	0.267419798
LINC00673	153.3570019	1.132209325	0.446021305	2.53846467	0.011134004	0.267804583
ELAC2	1010.265506	0.312952985	0.123442869	2.535205057	0.011238152	0.268042884
MAP3K14-AS1	25.3284203	0.816923105	0.322050834	2.536627821	0.011192587	0.268042884
MOSPD1	232.3660991	-0.826245385	0.325718662	-2.536684203	0.011190785	0.268042884
NAA10	536.0502642	0.401826461	0.158347453	2.53762503	0.011160749	0.268042884
NETO2	157.6915794	1.165311153	0.459638203	2.535279152	0.011235775	0.268042884
ORC6	144.5374581	1.075578128	0.424099339	2.536146673	0.011207978	0.268042884
PPP2R2C	1546.776417	-1.11270694	0.438754333	-2.53605915	0.01121078	0.268042884
TEAD2	1575.732393	0.596732909	0.235369015	2.535307841	0.011234855	0.268042884
HDGF	4386.265519	0.57208704	0.225857519	2.532955479	0.011310532	0.268178885
LIMD2	340.7060876	0.813444818	0.32115467	2.532875573	0.01131311	0.268178885
LINC00877	10.26822223	-1.054418385	0.41607879	-2.534179609	0.011271094	0.268178885
LOC100507577	69.30587881	-0.70812086	0.279576902	-2.532830341	0.01131457	0.268178885
MCM8	192.932066	0.55701887	0.219854043	2.533584843	0.01129024	0.268178885
SIX2	14.06565132	1.180333434	0.465824171	2.533860429	0.011281366	0.268178885
TMEM229A	2.506890259	-1.201533509	0.47479582	-2.530632026	0.011385723	0.269584529
GTPBP2	763.4521191	0.32906032	0.1300701	2.529869057	0.01141051	0.269610331
SLC35C1	559.3047172	0.630772593	0.249297353	2.530201724	0.011399697	0.269610331
C10orf2	323.3097515	0.67941933	0.268690091	2.528635606	0.011450684	0.269834018
CLUH	1244.250306	0.55928533	0.221193729	2.528486372	0.011455553	0.269834018
POLR3A	530.4706856	0.486346478	0.19231134	2.528953718	0.011440311	0.269834018
QSOX1	3373.600423	0.819061326	0.323988385	2.528057684	0.011469551	0.269884337
NONO	6549.667677	0.432105691	0.171001547	2.526911011	0.011507066	0.270487365
CCNF	171.7161727	0.890445619	0.352547741	2.525744786	0.011545332	0.2708273
ZAK	3401.631668	-1.004460999	0.39764368	-2.526032854	0.011535869	0.2708273
BRMS1	485.8425785	0.475213266	0.188832916	2.516580664	0.011849977	0.270854345
CASD1	450.7753818	-0.542217176	0.215231541	-2.519227305	0.01176127	0.270854345
CEP55	197.7752153	1.097018712	0.435746171	2.517563629	0.011816962	0.270854345
CGNL1	1847.732181	-0.709148557	0.281239954	-2.521507156	0.01168533	0.270854345
CHD7	666.3544653	0.918016993	0.365167983	2.513958059	0.011938463	0.270854345
CXCL12	3472.213993	-1.188932926	0.471318984	-2.522565324	0.011650231	0.270854345
DIAPH1	1932.520072	0.558977642	0.221978841	2.518157318	0.011797062	0.270854345
DYNC1H1	6339.994914	0.381069668	0.15112446	2.521561826	0.011683514	0.270854345
FANCD2	259.2165426	0.849682208	0.337963027	2.514127704	0.011932722	0.270854345
FKBP7	331.611697	-0.894978558	0.354790114	-2.522557768	0.011650481	0.270854345
FRMPD4	3.333628679	-1.219135137	0.484628834	-2.515605865	0.011882798	0.270854345
FTO	853.6749943	-0.346760139	0.137465935	-2.52251686	0.011651836	0.270854345
GINS1	191.1840102	0.984507272	0.391319692	2.515864373	0.011874087	0.270854345
HRAS	311.3427034	0.416288798	0.165045712	2.522263645	0.011660228	0.270854345
KPNA5	150.4262449	-0.61978988	0.245662868	-2.522928621	0.011638202	0.270854345
LSM1	366.5507548	0.527084252	0.209599534	2.514720527	0.011912677	0.270854345
NPHP3	98.75180733	-0.825362025	0.327989147	-2.516430901	0.011855014	0.270854345
OLFM1	206.7111485	-1.099986353	0.436500606	-2.520011056	0.011735115	0.270854345
PAXBP1-AS1	32.0682695	-0.70110873	0.278596188	-2.516576895	0.011850104	0.270854345
PDP1	733.2883494	0.566995685	0.225156102	2.518233711	0.011794503	0.270854345
PRCC	979.1862413	0.245401828	0.097323457	2.521507504	0.011685318	0.270854345
PTH1R	159.9576823	-1.093322028	0.434698118	-2.515129427	0.011898869	0.270854345
RAB40C	464.831476	0.621181416	0.246180728	2.523273941	0.011626779	0.270854345
RACGAP1	387.3040425	0.940186904	0.372425422	2.524497116	0.011586396	0.270854345
RPUSD2	162.0221405	0.315766852	0.12527294	2.520630974	0.011714463	0.270854345
SIRT6	257.4382197	0.490332203	0.194261112	2.524088313	0.011599878	0.270854345
SMCO2	1.324562584	1.219874422	0.485226418	2.514031342	0.011935983	0.270854345
SRSF9	803.7941513	0.681080504	0.270283441	2.519875069	0.011739649	0.270854345
TGFBR3L	15.30139151	-1.110913816	0.441884012	-2.514039401	0.01193571	0.270854345
TRUB2	415.7252662	0.427210398	0.16993705	2.513933237	0.011939303	0.270854345
UBL3	1211.524695	-0.691241343	0.274353006	-2.519532602	0.011751076	0.270854345
UPF1	2446.911047	0.455328697	0.180708171	2.519690691	0.0117458	0.270854345
USP42	302.739241	0.26535148	0.105347779	2.518814179	0.011775078	0.270854345
BLM	109.3738051	1.00142172	0.398544729	2.512695935	0.011981255	0.271265155
RNF145	1091.806948	0.390756387	0.155497136	2.512949084	0.011972661	0.271265155
NLGN3	117.4073425	-1.135211175	0.45185896	-2.512313081	0.011994263	0.271289714
CHL1	99.41322201	-1.155514181	0.460082403	-2.511537443	0.012020653	0.271347168
ISG15	678.36438	1.099915243	0.437910715	2.511734025	0.01201396	0.271347168
PSMD14	781.6592902	0.709503471	0.282574704	2.510852749	0.012043992	0.271604562
PSD2	11.31700229	-1.121871338	0.446951982	-2.510048914	0.012071444	0.271954094
APOL4	709.4322071	1.037891606	0.413667547	2.508999351	0.012107371	0.271966834
COL6A4P2	19.11055765	-1.108573318	0.441899955	-2.508652254	0.012119273	0.271966834
FAM19A2	35.87699232	-0.995919886	0.397104672	-2.507953082	0.012143279	0.271966834
LSM7	449.7926969	0.608729465	0.242577362	2.509424049	0.012092822	0.271966834
PLEKHG5	724.0878285	0.541838035	0.216078984	2.507592479	0.012155677	0.271966834
SERINC1	3630.827206	-0.670930604	0.267454262	-2.508580714	0.012121727	0.271966834
TMEM160	35.38530823	0.707371314	0.282083262	2.507668511	0.012153062	0.271966834
NPM3	339.8948893	0.740854844	0.29567291	2.505656819	0.012222419	0.272744151
NUDT5	302.0893736	0.772905194	0.30844172	2.505838687	0.012216134	0.272744151
ZCCHC12	937.5511085	-1.212776702	0.484037619	-2.505542242	0.012226379	0.272744151
NT5DC2	521.299391	0.647785242	0.258584073	2.505124284	0.012240837	0.272799226
NRG2	72.8575108	-1.105825776	0.441653939	-2.503828628	0.012285753	0.273532304
APH1A	2508.672785	0.396436592	0.158453922	2.501904579	0.012352721	0.273872506
COX6A1	1583.372349	0.620391278	0.247927484	2.50230942	0.012338604	0.273872506
PINLYP	38.51105888	-0.900524282	0.359890388	-2.502218209	0.012341783	0.273872506
PRMT1	2330.405515	0.566329511	0.226412564	2.501316622	0.01237325	0.273872506
ZNF345	88.0019419	-0.399376181	0.159579344	-2.502680934	0.012325661	0.273872506
ZNF577	179.3810499	-0.473844536	0.189416923	-2.501595576	0.012363507	0.273872506
LOC642366	6.419105048	-1.093858331	0.437447813	-2.500545889	0.012400207	0.273936217
PIF1	73.36590338	1.010487844	0.404090622	2.50064661	0.012396681	0.273936217
ARPC4	1038.026763	0.353191431	0.141574728	2.494735009	0.012605123	0.274246443
CDC45	119.2858135	1.079473322	0.43196346	2.498992213	0.012454705	0.274246443
COPE	1624.459857	0.624864704	0.250574782	2.49372542	0.012641029	0.274246443
CYGB	198.6382164	-0.794537278	0.318009846	-2.49846754	0.012473157	0.274246443
EGR1	22839.37408	-1.19466956	0.478292461	-2.497780452	0.012497357	0.274246443
ERCC2	378.289956	0.454342069	0.182202667	2.493608226	0.012645203	0.274246443
ESD	1191.304667	-0.519341466	0.207757226	-2.49975164	0.01242804	0.274246443
FBXO40	3.435652864	-1.158970068	0.463910953	-2.498259764	0.01248047	0.274246443
FGFRL1	595.6378597	0.761041633	0.305223416	2.493392031	0.012652906	0.274246443
FIBP	702.9921877	0.420666228	0.168624527	2.494691822	0.012606657	0.274246443
GPRIN1	47.31711984	0.891507994	0.357428714	2.494226008	0.012623214	0.274246443
H2AFX	390.4520617	0.766340209	0.306990867	2.496296446	0.012549767	0.274246443
RFTN2	66.58936893	-0.93716902	0.375476919	-2.495943085	0.012562276	0.274246443
RIPPLY3	44.30406874	1.175781572	0.471571767	2.493324777	0.012655303	0.274246443
SFN	468.4128469	1.090041845	0.43647777	2.497359361	0.012512209	0.274246443
SLC16A13	36.9917708	0.661567437	0.265029458	2.496203416	0.012553059	0.274246443
STAP2	465.9299382	0.895360446	0.358330461	2.498700342	0.012464966	0.274246443
TFAP2A	385.6806194	1.182577401	0.474137312	2.494166501	0.012625331	0.274246443
TMEM110	351.7094864	-0.578438475	0.231941785	-2.493895068	0.012634989	0.274246443
ZNF442	37.74443041	-0.58791354	0.235434067	-2.497147276	0.012519695	0.274246443
KLK14	32.35228988	1.010757911	0.405443527	2.492968425	0.012668011	0.274260632
CADM4	786.6718707	0.566929674	0.227560578	2.491335182	0.0127264	0.274480095
CENPC	317.3372259	-0.385103452	0.154551583	-2.491747053	0.012711653	0.274480095
KRT7	1570.094744	1.174183295	0.47119536	2.491924573	0.012705302	0.274480095
USP5	1496.064919	0.490866042	0.197003561	2.491660756	0.012714741	0.274480095
ARPC2	2497.364314	0.396206633	0.159095928	2.490363126	0.012761264	0.274539844
ATP13A1	1443.05881	0.458076994	0.184162309	2.487354745	0.0128697	0.274539844
BHLHB9	171.1525353	-0.664507582	0.267238546	-2.486570863	0.012898088	0.274539844
C1orf64	57.0215163	-1.205497917	0.484771701	-2.486733271	0.012892202	0.274539844
FAM198B	2792.701479	-0.892872123	0.358921493	-2.487652986	0.012858913	0.274539844
FOXA1	508.7445057	1.200752051	0.482398791	2.489127405	0.012805707	0.274539844
LIX1	13.96712718	-1.200214851	0.482355333	-2.48823796	0.01283778	0.274539844
MGAT5	1366.710647	0.362895054	0.145836326	2.488372162	0.012832936	0.274539844
MRPS18A	414.6391905	0.324559295	0.130493599	2.487166399	0.012876516	0.274539844
NOP14	624.3958311	0.371928946	0.149499257	2.487831403	0.012852465	0.274539844
PHC3	1100.828401	-0.518829879	0.208604595	-2.487145021	0.012877289	0.274539844
TCEAL7	228.9418501	-1.08210432	0.43495835	-2.48783434	0.012852358	0.274539844
ZFP2	58.64151077	-0.770753687	0.309545658	-2.489951533	0.012776052	0.274539844
ZNF449	99.42890679	-0.482196408	0.193808595	-2.488003217	0.012846257	0.274539844
DUSP1	6854.1863	-1.096978772	0.441340302	-2.485562203	0.012934698	0.27467132
FOSB	5928.657553	-1.199591214	0.482667666	-2.485335766	0.012942929	0.27467132
KANSL1L	345.0373958	-0.486762423	0.195874633	-2.485071266	0.01295255	0.27467132
SAP30L	762.7836636	-0.663862572	0.267087849	-2.485558866	0.012934819	0.27467132
EIF4E2	883.5996214	0.324627977	0.130719431	2.483394973	0.01301367	0.27571048
FAM131B	126.2352732	-0.978182743	0.394037686	-2.482459874	0.013047876	0.275921353
ZBTB38	1807.089094	-0.650683842	0.262078656	-2.482780751	0.01303613	0.275921353
ATP1B2	274.7780673	-1.133381101	0.456939676	-2.480373584	0.013124479	0.276148447
CDCA5	276.9657596	1.079294668	0.435073944	2.480715478	0.013111899	0.276148447
FLJ16779	26.37819753	-1.196568236	0.482412209	-2.480385472	0.013124042	0.276148447
RIT1	453.0121108	0.325593992	0.131295558	2.479855353	0.013143569	0.276148447
SLC19A1	194.9692354	0.835525709	0.33680001	2.480776974	0.013109637	0.276148447
TTYH3	1795.349366	0.8601466	0.346820428	2.480092087	0.013134846	0.276148447
USP43	388.0597389	1.090360156	0.439371526	2.481635907	0.013078083	0.276148447
PRSS8	2114.146852	1.040007364	0.419447121	2.479471932	0.013157709	0.276190498
ANXA2P2	82.23179919	0.878812658	0.354803635	2.476898689	0.013252952	0.276317097
BORA	81.57939748	0.748752607	0.302293744	2.476904075	0.013252752	0.276317097
CCDC178	8.572997257	-1.026476215	0.414145605	-2.478539439	0.013192153	0.276317097
ELAVL2	5.884004579	-1.122088499	0.4527532	-2.478366798	0.013198538	0.276317097
GOLGA8N	59.94369453	-0.922854653	0.372616891	-2.476684973	0.013260889	0.276317097
RPS6KA3	897.8165028	-0.484008163	0.195418264	-2.476780581	0.013257338	0.276317097
TCEB2	1257.753146	0.359690657	0.145203652	2.477146073	0.013243769	0.276317097
ZBTB42	190.165042	0.602845415	0.243373055	2.477042557	0.01324761	0.276317097
PSMD13	1512.34136	0.48149771	0.194483808	2.475772738	0.013294817	0.276770609
GBF1	1734.81169	0.303727865	0.122710078	2.475166424	0.01331741	0.276987526
RAB11FIP4	752.048165	0.969930371	0.391931011	2.47474771	0.013333032	0.277059196
MLF2	2379.811084	0.364790572	0.147458348	2.473854992	0.013366394	0.277499016
ARPC1B	1764.838246	0.623944043	0.252299438	2.473029857	0.013397295	0.277691304
DLEU7-AS1	3.445741915	1.135303935	0.459136379	2.472694357	0.013409877	0.277691304
PI15	179.4707663	-1.127714601	0.456078873	-2.472630651	0.013412268	0.277691304
PPIH	370.4298927	0.483968698	0.195757927	2.472281477	0.013425376	0.277710012
CDK5RAP2	1089.558425	0.283409202	0.114792967	2.468872516	0.01355395	0.278220022
CHPT1	276.9236312	-0.693084958	0.280726084	-2.468901174	0.013552864	0.278220022
ENO1	15400.06156	0.88534758	0.358454752	2.469900526	0.013515063	0.278220022
FBXL6	209.9449395	0.546892107	0.221414911	2.469987704	0.01351177	0.278220022
FEN1	431.7069371	0.813382609	0.32937123	2.469501078	0.013530161	0.278220022
NADSYN1	790.7515665	0.467879993	0.189441175	2.469790382	0.013519225	0.278220022
POLK	427.3400198	-0.39694333	0.160673303	-2.470499603	0.013492447	0.278220022
YDJC	178.706642	0.525458305	0.212778333	2.469510393	0.013529809	0.278220022
ZFAT	163.5529786	0.306597231	0.124193258	2.468710754	0.013560078	0.278220022
ALAS1	717.1427279	0.543820369	0.220522416	2.466054826	0.013661042	0.27842153
AREL1	671.4323284	0.531401618	0.215717708	2.463412134	0.013762162	0.27842153
DDX17	8455.366042	-0.314390859	0.127666275	-2.462599151	0.013793403	0.27842153
EIF6	1512.775272	0.351598253	0.142845414	2.461389859	0.013839988	0.27842153
FARSA	1032.379479	0.530253041	0.215039871	2.46583593	0.013669393	0.27842153
GRID1	83.56804541	-1.125377292	0.457265494	-2.461102593	0.013851075	0.27842153
GRPEL1	372.9723228	0.475016166	0.192962848	2.461697531	0.013828123	0.27842153
HSD17B10	748.3818525	0.476472713	0.193601841	2.461095984	0.01385133	0.27842153
ITGB6	391.0518159	1.111745895	0.451313269	2.463357433	0.013764262	0.27842153
KIAA1522	1583.493419	0.745299203	0.302753678	2.461734592	0.013826694	0.27842153
KIF11	375.2270231	1.079253189	0.437677508	2.465863954	0.013668324	0.27842153
LAMA5	3329.256271	0.715502714	0.290069279	2.466661474	0.013637922	0.27842153
MGAT4B	1005.00874	0.497448902	0.201804848	2.464999759	0.013701334	0.27842153
MSI1	320.2613672	0.826764212	0.335321838	2.465584162	0.013679004	0.27842153
NDUFA3	418.6950646	0.41622982	0.169110103	2.461294821	0.013843656	0.27842153
NOSIP	805.0404458	0.474308039	0.192254633	2.467082496	0.013621897	0.27842153
PRDX2	2993.363944	0.668549217	0.271331781	2.463954701	0.013741348	0.27842153
SLC35A4	1252.473845	0.366787349	0.148960908	2.462306076	0.01380468	0.27842153
STARD13	644.4100527	-0.689844187	0.280127027	-2.46261203	0.013792908	0.27842153
TAGLN2	5282.256582	0.527446729	0.213876938	2.466122503	0.013658461	0.27842153
TPRN	194.3837869	0.62957665	0.255517005	2.463932483	0.0137422	0.27842153
UBE2T	143.9929437	0.96725799	0.392207331	2.466190489	0.013655869	0.27842153
ZDHHC12	273.3658309	0.718876337	0.292057455	2.461420949	0.013838789	0.27842153
BCAT1	3164.258343	1.123255063	0.456847064	2.458711352	0.013943668	0.279248588
C9orf16	409.2684438	0.63038699	0.256416486	2.458449534	0.013953839	0.279248588
COG5	751.9380115	-0.402268281	0.163578119	-2.459181482	0.01392542	0.279248588
FOXL2NB	425.5116898	-1.014563081	0.412675216	-2.458502576	0.013951778	0.279248588
NPLOC4	1348.402664	0.311761363	0.126747997	2.459694596	0.013905529	0.279248588
ARHGEF33	17.64747901	-0.745827549	0.303693206	-2.455858526	0.014054848	0.279304806
B4GALT3	532.7761236	0.466945924	0.190007003	2.457519552	0.01399002	0.279304806
BRCAT54	17.20777481	-0.864735329	0.352003934	-2.456607006	0.014025602	0.279304806
KCTD12	3024.984537	-1.032893551	0.420477405	-2.456478131	0.014030634	0.279304806
LINC00639	40.60487656	-1.106982926	0.450626656	-2.456541152	0.014028173	0.279304806
NCAPD3	526.8035223	0.638332249	0.259911613	2.455958942	0.014050921	0.279304806
SNRNP25	293.6729456	0.497365101	0.20250295	2.456088179	0.014045869	0.279304806
TRAIP	107.4354185	0.918856827	0.374037694	2.456588849	0.014026311	0.279304806
SLC52A2	567.030735	0.729988497	0.297315098	2.455268841	0.014077926	0.279417828
SNHG3	335.2005049	0.866773247	0.353097171	2.454772564	0.014097375	0.279417828
XYLT1	312.7731054	-0.976723208	0.397838733	-2.455073191	0.014085591	0.279417828
ACTR3	2572.461473	0.433217081	0.176699212	2.451720509	0.014217504	0.279440133
CEP290	464.6215154	-0.432330404	0.176206657	-2.453541839	0.014145708	0.279440133
CHMP1B	1156.184983	0.356192628	0.14524689	2.452325341	0.014193627	0.279440133
CLN6	497.0380855	0.487487083	0.19882156	2.451882393	0.01421111	0.279440133
HAGH	372.7289199	0.295590575	0.120504587	2.45294044	0.01416938	0.279440133
KXD1	954.2896704	0.392905587	0.160259235	2.451687643	0.014218803	0.279440133
PSMC5	1418.640676	0.251649014	0.102576973	2.45327004	0.014156402	0.279440133
RFC2	291.1708255	0.491050692	0.200321453	2.451313555	0.01423359	0.279440133
ULBP1	7.518794554	1.125564523	0.459125764	2.451538578	0.014224694	0.279440133
VAMP4	321.0063607	-0.49364429	0.201244257	-2.452960875	0.014168575	0.279440133
ZNF546	89.87272292	-0.573199139	0.233829252	-2.451357702	0.014231845	0.279440133
UNC13B	802.8589849	0.405069109	0.16530337	2.450458873	0.014267426	0.279862941
ADAMTS7P1	2.082570862	-1.155004131	0.472001323	-2.447035793	0.014403653	0.280845633
CCDC136	62.2592952	-1.058033355	0.432316014	-2.447361006	0.014390662	0.280845633
CYP2U1	259.8506185	-0.774984705	0.316992929	-2.444801239	0.014493199	0.280845633
DBN1	2667.22967	0.535943361	0.21897095	2.447554622	0.014382932	0.280845633
DFNB59	31.99517292	-0.691332966	0.282714546	-2.445339219	0.014471596	0.280845633
FADS2	2535.72141	0.739138087	0.302397627	2.444258883	0.014515007	0.280845633
FAM187B	0.873887625	-1.137866197	0.465012344	-2.44695912	0.014406718	0.280845633
GIN1	93.11313263	-0.567718147	0.231841571	-2.448733181	0.01433596	0.280845633
LAYN	242.5293135	-1.008152838	0.41219887	-2.445792339	0.014453422	0.280845633
MIR4435-2HG	70.08070081	0.876411797	0.358398149	2.445358043	0.01447084	0.280845633
NCALD	743.9537446	0.952818783	0.389801406	2.444369797	0.014510545	0.280845633
PGAM1	3781.26045	0.609950906	0.249490662	2.444784515	0.014493871	0.280845633
POP4	313.0344691	0.307770995	0.125722942	2.44800981	0.014364774	0.280845633
RAB8B	450.0130837	-0.667367841	0.272907904	-2.445395801	0.014469325	0.280845633
SRPK1	944.4496355	0.603012283	0.246616201	2.445144648	0.014479406	0.280845633
TUFT1	303.2249742	0.594760828	0.24314304	2.446135525	0.014439671	0.280845633
LYRM9	175.7989469	-0.709451423	0.290303633	-2.443825511	0.014532453	0.280944299
C21orf62	7.820945909	-1.016422065	0.416152896	-2.442424585	0.014588977	0.281070471
CCNB1	553.4440541	1.009126113	0.413649228	2.439569678	0.014704767	0.281070471
COMMD9	327.8245744	0.537544163	0.220475273	2.438115424	0.014764059	0.281070471
DIAPH3	121.0913092	1.018903981	0.417375832	2.441214611	0.014637953	0.281070471
FAM174B	648.3817545	0.923012439	0.377863272	2.442715413	0.014577227	0.281070471
KIAA1467	177.5199374	0.59620541	0.244246908	2.440994708	0.014646869	0.281070471
KRT18	3221.067603	1.011644157	0.414455913	2.44089691	0.014650836	0.281070471
LLPH	362.1385939	0.51941548	0.212587972	2.443296655	0.014553769	0.281070471
LOC100287846	8.306076499	-0.935921453	0.383105373	-2.442987019	0.014566261	0.281070471
NDUFA13	1536.194832	0.508985031	0.20849437	2.441241132	0.014636878	0.281070471
PES1	1254.489757	0.324035635	0.132692937	2.441996099	0.014606304	0.281070471
PNKP	520.3890199	0.363628898	0.149050825	2.439630216	0.014702303	0.281070471
PSMB7	708.128854	0.362596665	0.148734421	2.43787997	0.014773679	0.281070471
SNORD88B	5.393067941	1.141824052	0.467989266	2.439850943	0.014693323	0.281070471
SYNE4	120.0133016	0.88631057	0.363479477	2.438406088	0.014752191	0.281070471
TRAPPC3	578.0958755	0.260624959	0.106789188	2.440555668	0.014664686	0.281070471
UCHL1	420.3074403	1.178930552	0.483587753	2.437883392	0.014773539	0.281070471
VOPP1	1952.15977	0.483611891	0.198349791	2.43817696	0.014761546	0.281070471
ZNF493	207.2223115	-0.502747875	0.206144227	-2.438816179	0.014735462	0.281070471
KPTN	120.4149916	0.460391974	0.188923584	2.436921663	0.014812888	0.281370868
MAN2B1	1458.950406	0.546443721	0.224238189	2.436889642	0.0148142	0.281370868
AMOTL2	1572.168355	-0.672759725	0.276214225	-2.43564474	0.014865276	0.281635713
NPR3	376.0709606	-0.913230654	0.374900856	-2.43592576	0.014853733	0.281635713
PC	173.6921539	0.730524289	0.299856649	2.436245094	0.014840625	0.281635713
PGM2L1	783.9219365	0.756997483	0.310875504	2.435050281	0.014889721	0.281864143
ACAP2	932.1773883	-0.287434193	0.118090939	-2.434007179	0.014932699	0.28216307
CDKN2C	185.5574708	-0.787716734	0.323635822	-2.433960269	0.014934634	0.28216307
UBE2M	619.3143533	0.363732916	0.149452798	2.433764505	0.014942713	0.28216307
MRPL51	996.8824658	0.43973709	0.180765476	2.432638687	0.01498925	0.282807125
SLC30A2	22.4604884	1.178967199	0.484882908	2.431447219	0.015038639	0.283503892
GABRG1	2.057893646	-1.125685259	0.463160245	-2.430444477	0.015080316	0.283958466
PVRL2	1766.986132	0.65184138	0.268218032	2.430266811	0.015087711	0.283958466
C17orf67	46.36652258	-0.723942349	0.29819807	-2.427723124	0.015193938	0.284311561
CACNA1G-AS1	4.809284383	-1.088443104	0.448123582	-2.428890485	0.015145106	0.284311561
DLX3	14.67967882	1.169222399	0.481273336	2.42943523	0.015122367	0.284311561
LOC100996255	55.90673065	-0.724699321	0.298483214	-2.427939952	0.015184857	0.284311561
MYH14	1993.195477	0.981623859	0.40419636	2.428581638	0.015158012	0.284311561
PSMC2	1097.065585	0.341290692	0.140553136	2.428196916	0.015174102	0.284311561
PVRL4	378.8470222	1.065002124	0.438599121	2.428190283	0.01517438	0.284311561
SLC16A4	97.90780481	-0.715048555	0.294705646	-2.42631441	0.01525305	0.285183146
DET1	170.2618226	-0.725672137	0.299313405	-2.424455857	0.015331347	0.285240778
NCF2	171.513721	0.704474393	0.290562327	2.424520756	0.015328607	0.285240778
NUSAP1	380.9051166	1.010681275	0.416830403	2.424682236	0.015321791	0.285240778
PLA2G4F	7.209397997	1.165140222	0.480573346	2.424479494	0.015330349	0.285240778
PON2	824.57909	0.535902578	0.220940026	2.425556774	0.015284925	0.285240778
WHSC1	1350.719315	0.582055028	0.239957338	2.425660465	0.015280559	0.285240778
LOC646214	127.767557	-0.643739174	0.265598384	-2.423731513	0.015361958	0.285441042
SNCA	202.874604	-1.124277889	0.463886106	-2.423607595	0.0153672	0.285441042
KLHL25	234.882027	0.659116744	0.272060584	2.422683701	0.015406334	0.285934526
ENTPD6	803.8898347	0.451055683	0.186272604	2.421481594	0.015457384	0.286414749
PPP3CB	923.0437701	-0.426437835	0.176096101	-2.421619967	0.0154515	0.286414749
APOBEC3B	45.32494093	0.97898376	0.405224785	2.415902966	0.015696244	0.286565685
ARHGAP10	323.5781004	-0.75021607	0.309903029	-2.420809088	0.015486008	0.286565685
B4GALT5	1873.884945	0.607018377	0.250859776	2.419751733	0.015531107	0.286565685
C5	97.08141972	-0.644718584	0.266420342	-2.419930021	0.015523494	0.286565685
CHCHD1	327.3381654	0.58277192	0.240909595	2.419048192	0.015561178	0.286565685
DR1	814.6965546	-0.303353309	0.125566826	-2.415871437	0.015697603	0.286565685
LOC100289580	3.763864244	-1.128782499	0.467039539	-2.41688852	0.015653811	0.286565685
LOC389765	70.5975918	-0.562105893	0.23243565	-2.418329083	0.015591969	0.286565685
LRP8	139.3447277	0.760133825	0.3141643	2.419542335	0.015540052	0.286565685
MCM2	713.5061046	0.687042395	0.283941523	2.419661582	0.015534957	0.286565685
MMP10	150.3839131	1.173269768	0.485672175	2.415764848	0.015702198	0.286565685
MROH6	94.93187051	0.976190354	0.404101788	2.415704121	0.015704817	0.286565685
PCNXL3	1133.131343	0.415068824	0.171649692	2.418115747	0.015601113	0.286565685
PGAM5	537.2446108	0.599794555	0.247956673	2.418949039	0.015565421	0.286565685
RNF146	767.1484066	-0.458198505	0.189535829	-2.41747699	0.015628522	0.286565685
SARDH	80.1645891	-0.797788015	0.32991843	-2.418137159	0.015600195	0.286565685
SREBF1	1895.665623	0.715737555	0.296121035	2.417043944	0.015647128	0.286565685
ZNF527	94.44661838	-0.393906299	0.162940674	-2.41748294	0.015628267	0.286565685
ZNF625-ZNF20	12.05696394	0.659396532	0.272917636	2.416100848	0.015687716	0.286565685
A1BG	37.30062518	-0.80327221	0.333210503	-2.410704951	0.015921723	0.286804537
ATP6V1B1	172.3552937	1.154382982	0.478847783	2.41075144	0.015919694	0.286804537
BAG6	3302.207569	0.204310703	0.084708945	2.411914156	0.015869017	0.286804537
BIVM	165.3733258	-0.413219932	0.171483187	-2.409681907	0.015966434	0.286804537
CHEK1	184.7805748	0.904560944	0.375461062	2.409200408	0.015987516	0.286804537
CHERP	776.5087287	0.410329232	0.169959388	2.414278122	0.015766422	0.286804537
CS	2544.288689	0.554939936	0.230304733	2.409589808	0.015970465	0.286804537
DGKH	701.6945335	-0.455156571	0.188758652	-2.411315014	0.015895113	0.286804537
EWSR1	3668.967735	0.296035634	0.122959353	2.407589386	0.016058231	0.286804537
HAPLN3	700.2609209	1.044406465	0.432883613	2.412672678	0.015836034	0.286804537
ILF3	5741.186124	0.501868969	0.208451273	2.407608081	0.016057408	0.286804537
KDM2B	867.0381793	0.389732165	0.161496893	2.41324869	0.015811027	0.286804537
LINC01234	3.128918724	1.148151249	0.475978897	2.412189396	0.015857042	0.286804537
LOC101929268	3.318383946	-1.160444498	0.481233318	-2.411396833	0.015891547	0.286804537
LOC389641	43.32718562	0.928487941	0.384544478	2.41451378	0.015756227	0.286804537
MAGOH2P	11.32601596	-0.960758114	0.399011417	-2.407846173	0.016046941	0.286804537
MIR497HG	36.80152037	-0.995793062	0.413474969	-2.408351498	0.016024744	0.286804537
MRPL4	584.641214	0.526310495	0.218273047	2.411248222	0.015898024	0.286804537
PPM1K	682.9419347	-0.947386256	0.393494696	-2.40762141	0.016056822	0.286804537
RDM1	10.71309236	1.075319905	0.446317851	2.409314131	0.015982535	0.286804537
SLC35B2	834.8675199	0.493785797	0.204517018	2.414399556	0.015761168	0.286804537
SLC6A10P	8.252435963	1.174132625	0.48650454	2.413405279	0.015804235	0.286804537
SLC9B2	133.1661056	-0.794782852	0.329943552	-2.408844925	0.016003096	0.286804537
SMG9	575.5315996	0.563612449	0.233530849	2.41343896	0.015802775	0.286804537
TARBP2	396.5280659	0.552783722	0.229550356	2.408115285	0.016035117	0.286804537
TWSG1	1200.147069	-0.573629115	0.238099958	-2.409194528	0.015987774	0.286804537
VSTM4	618.2611631	-0.994311469	0.412543689	-2.410196773	0.015943919	0.286804537
ZNF655	872.4212356	-0.229567473	0.095418788	-2.405893834	0.016132952	0.287913096
NUP62	1330.612277	0.345607502	0.143685974	2.405297421	0.016159308	0.288157447
ANXA2	8910.462778	0.843812411	0.350938461	2.40444552	0.01619702	0.28834189
CAPN1	3501.892552	0.622939179	0.259103986	2.404205306	0.016207668	0.28834189
SOCS2	677.7052966	-1.063629634	0.442382342	-2.404322083	0.016202491	0.28834189
SLC12A7	1458.732641	0.475717029	0.19789554	2.403879485	0.01622212	0.288373534
TMCC1-AS1	41.24557694	-0.672810954	0.279954411	-2.40328756	0.016248405	0.288615302
PDCD11	1070.796874	0.507173021	0.211072361	2.402839571	0.016268323	0.288743693
NPR2	557.7998311	-0.880091245	0.366393468	-2.402038577	0.016303989	0.289151181
ULBP3	44.85643541	1.099948798	0.458038135	2.401434977	0.016330911	0.289403078
ABI2	1410.268571	-0.412206439	0.171699878	-2.400738107	0.016362042	0.289503813
NBAT1	14.69750344	-0.978327413	0.407488076	-2.40087372	0.01635598	0.289503813
EPRS	1965.031685	0.288964771	0.120388422	2.400270438	0.016382963	0.289648751
BDNF-AS	38.5942425	-0.610850246	0.254774318	-2.397613113	0.016502285	0.289937026
BNIP3	697.8078523	0.861240083	0.359047329	2.398681217	0.016454232	0.289937026
CCNK	764.5287711	0.31000495	0.129275671	2.398014625	0.016484207	0.289937026
FAM161B	187.465547	-0.498358816	0.2076951	-2.399473144	0.016418684	0.289937026
GDAP1L1	7.221183599	-1.110644244	0.46313186	-2.398116694	0.016479614	0.289937026
MYEOV	53.82467134	1.149319552	0.479277048	2.398027524	0.016483627	0.289937026
NHSL1	286.9584067	0.945932818	0.394573648	2.397354268	0.016513949	0.289937026
PRR7	36.7158824	0.715087775	0.298273402	2.397423871	0.016510812	0.289937026
TRMT13	164.9336993	-0.314929878	0.131321521	-2.398158937	0.016477714	0.289937026
DBH-AS1	26.49126837	-0.778323602	0.324941516	-2.39527288	0.016608	0.289957531
DHX8	836.4674855	0.282424358	0.117853383	2.396404338	0.016556815	0.289957531
GZMB	74.26065917	1.062119999	0.443481696	2.394957917	0.016622273	0.289957531
NARF	619.1266488	0.532696189	0.222330064	2.395970119	0.016576442	0.289957531
PALLD	8413.799062	-0.88984342	0.371308343	-2.396508016	0.016552131	0.289957531
PAMR1	1884.439639	-0.971724615	0.405534006	-2.396160621	0.016567828	0.289957531
PAX2	97.14271883	-1.165164806	0.486541169	-2.394791809	0.016629805	0.289957531
POU4F1	3.493756755	1.131181958	0.47221887	2.395461151	0.016599473	0.289957531
WBSCR22	1220.497475	0.376436588	0.157182691	2.394898479	0.016624968	0.289957531
SLC7A3	106.7222513	-1.160276551	0.484607526	-2.394260282	0.016653926	0.290155764
XDH	35.08407145	1.071997505	0.4478761	2.393513532	0.016687866	0.290524634
AIM1L	48.48148421	1.119645663	0.468415469	2.390283278	0.016835382	0.290535014
ATP6V0E2	531.8082419	0.552661705	0.230978867	2.392693807	0.016725192	0.290535014
CTB-113P19.1	2.718854221	-1.109557424	0.463772626	-2.392459929	0.016735855	0.290535014
GSG2	43.30113575	0.988502757	0.413475084	2.390719046	0.016815415	0.290535014
GTF2IRD2	150.7515125	-0.546689736	0.228531934	-2.392180932	0.016748584	0.290535014
HBA1	16.39134864	-1.10782666	0.463244282	-2.39145242	0.016781859	0.290535014
KRAS	694.2333035	0.578795051	0.242111873	2.390609942	0.016820412	0.290535014
LINC00924	14.25226425	-1.149294269	0.480864014	-2.390060882	0.01684558	0.290535014
MYBBP1A	822.8412124	0.355187949	0.148622974	2.389858974	0.016854843	0.290535014
NAT2	4.017674316	-1.160593778	0.485363182	-2.391186273	0.01679403	0.290535014
NCAPH	153.9652232	1.018771999	0.426200272	2.390359808	0.016831874	0.290535014
NOXA1	463.5769795	0.640866997	0.268050318	2.390845874	0.016809608	0.290535014
PSAT1	422.1242057	0.989931986	0.414268667	2.389589332	0.016867221	0.290535014
SNRPA1	402.4102463	0.42033008	0.175819153	2.390695622	0.016816488	0.290535014
ACTL6A	722.8202571	0.430035277	0.180305122	2.385041937	0.017077174	0.290702512
CNFN	9.866638807	1.019530101	0.427453476	2.385125304	0.017073305	0.290702512
CTGF	5377.262714	-0.82887622	0.347446965	-2.385619398	0.017050387	0.290702512
EIF5A	3308.879623	0.552950529	0.231535644	2.388187486	0.016931702	0.290702512
ERH	1343.72212	0.430935669	0.18066151	2.385320856	0.017064231	0.290702512
GAS2L3	81.6811934	0.80759066	0.338407456	2.38644464	0.017012168	0.290702512
GDNF-AS1	7.542049139	-1.104552366	0.463157885	-2.38482902	0.017087061	0.290702512
MARCKSL1	4404.791262	0.868590483	0.3642832	2.384382493	0.017107811	0.290702512
MCM4	1003.73283	0.854894109	0.358266758	2.386194336	0.017023752	0.290702512
NDUFS3	505.563905	0.399846015	0.167744763	2.383657225	0.01714156	0.290702512
OTUB1	1197.482783	0.420718522	0.176362387	2.38553429	0.017054332	0.290702512
PLEKHD1	8.755989118	1.145351461	0.480517668	2.383578247	0.017145239	0.290702512
PSMD11	1114.721045	0.419195352	0.1755647	2.387697259	0.016954302	0.290702512
SLC24A3	870.1628493	-1.074592072	0.450659761	-2.384486404	0.01710298	0.290702512
SMS	1827.904672	0.923982527	0.386900396	2.388166402	0.016932673	0.290702512
SNRPB	1612.008376	0.454132433	0.190227923	2.387306892	0.016972317	0.290702512
TIMM13	689.2036051	0.608329897	0.254719064	2.388238585	0.016929347	0.290702512
TPI1	7909.003014	0.891546834	0.37398814	2.383890664	0.017130691	0.290702512
WARS	2449.516541	0.730175215	0.305934479	2.386704553	0.017000147	0.290702512
WBSCR17	147.8056721	-1.02643996	0.430014592	-2.386988672	0.016987015	0.290702512
ZNF529	258.344287	-0.36098388	0.151320644	-2.385556069	0.017053323	0.290702512
SLC25A10	380.6311598	0.903254777	0.379067571	2.38283316	0.017179979	0.291074633
CLEC2B	150.9107098	-0.808407426	0.339555758	-2.380779612	0.017276044	0.291332736
DNAJC9	577.1796999	0.537169474	0.225622403	2.380833934	0.017273497	0.291332736
FAM222B	416.8462531	0.439574963	0.184649422	2.380592144	0.017284838	0.291332736
PAGE4	162.5670873	-1.158651453	0.486462617	-2.381789293	0.017228752	0.291332736
PPIL2	760.4814137	0.240869992	0.101146042	2.381407983	0.017246599	0.291332736
PSMB5	1392.345558	0.473394157	0.198743937	2.38193005	0.017222168	0.291332736
TMUB1	358.3958698	0.513911421	0.215872576	2.380623933	0.017283346	0.291332736
LINC00471	7.320785569	-0.781288721	0.328269007	-2.380025841	0.017311424	0.291564872
RRM2	386.6808516	1.031750588	0.433633789	2.379313177	0.017344933	0.291913165
GCH1	152.3269518	0.786185684	0.330667627	2.377570764	0.017427099	0.292224512
NUDT10	69.74236153	-1.035801152	0.435707147	-2.377287494	0.017440489	0.292224512
PMEPA1	1460.43132	-0.72723449	0.305781531	-2.378281278	0.017393552	0.292224512
TBC1D19	160.1312069	-0.535327148	0.225132218	-2.377834476	0.017414641	0.292224512
UBAP2L	2500.88331	0.260176916	0.109424986	2.377673748	0.017422233	0.292224512
ZNF48	330.4870966	0.591844198	0.248942217	2.37743604	0.017433466	0.292224512
MYO10	1662.339171	0.890976041	0.374984328	2.376035411	0.017499783	0.293002259
ZNF624	86.51109872	-0.535214756	0.225319033	-2.375364163	0.017531644	0.293319873
C19orf48	898.967005	0.806282342	0.33953358	2.374676288	0.017564347	0.293435494
NAV2	1018.627027	0.73074906	0.307701627	2.374862514	0.017555488	0.293435494
TMEM233	14.90693797	1.153407024	0.485933647	2.373589547	0.017616121	0.294084531
BMS1	1134.696202	0.4504945	0.189952627	2.371614998	0.017710534	0.294740744
FGD3	152.0214527	0.803759915	0.338975666	2.371143404	0.017733149	0.294740744
NOLC1	1993.832542	0.544381009	0.229571952	2.371287101	0.017726256	0.294740744
SLC9B1	8.150264051	-0.893164105	0.376482668	-2.372391029	0.017673376	0.294740744
TUFM	2310.279704	0.415895241	0.175346256	2.371851278	0.017699213	0.294740744
WHAMMP3	59.88374292	-0.849245573	0.358073978	-2.371704245	0.017706257	0.294740744
GLYATL2	275.3150349	1.145791659	0.483407015	2.370242101	0.017776441	0.295244624
GRIA2	762.1851331	-0.999512449	0.421849057	-2.369360397	0.017818881	0.295733633
AGBL5	689.1246703	0.272493856	0.115059425	2.368288015	0.017870618	0.295822074
CENPF	844.9733315	1.018052786	0.429889677	2.36817221	0.017876213	0.295822074
PEX14	362.1926254	0.263624733	0.111291109	2.368785222	0.017846614	0.295822074
RBM15B	1225.954339	0.272516146	0.115054593	2.36858119	0.017856461	0.295822074
C2orf72	6.929226275	1.113378556	0.471047806	2.363621148	0.018097309	0.2965728
CFL2	679.0929366	-1.012245985	0.428093506	-2.364544128	0.018052277	0.2965728
COA1	462.1829094	0.476557411	0.201410988	2.366094404	0.01797686	0.2965728
EBF1	266.5012708	-1.024445741	0.43339675	-2.363759632	0.018090546	0.2965728
EPHA5	19.28465494	-1.146509472	0.484681142	-2.365492224	0.018006121	0.2965728
FCGR3B	89.62229616	1.089830593	0.460653681	2.36583498	0.017989461	0.2965728
IL1RN	76.37751527	1.058894068	0.447934293	2.363949547	0.018081275	0.2965728
LGR6	82.42175537	1.149560011	0.486126658	2.364733537	0.018043048	0.2965728
NDC80	132.0282032	0.840724606	0.355689296	2.363648881	0.018095954	0.2965728
REPIN1	1594.656199	0.362149179	0.153167823	2.364394631	0.018059564	0.2965728
SEPP1	1400.970972	-0.756496901	0.319925488	-2.364603416	0.018049387	0.2965728
SLC6A16	49.35418018	-0.611585051	0.258530444	-2.365621013	0.01799986	0.2965728
UBE2O	826.166226	0.28832073	0.121964189	2.363978576	0.018079858	0.2965728
VPS33B	297.2317236	0.237215796	0.100367037	2.36348309	0.018104053	0.2965728
C1orf159	163.2320434	0.509774736	0.215767309	2.362613405	0.018146588	0.296801096
CENPU	152.6629211	0.944475447	0.399756943	2.36262425	0.018146058	0.296801096
CKS2	418.4337177	0.955942838	0.404740489	2.361866096	0.018183209	0.296801096
GRK6	575.8088832	0.325254916	0.137700565	2.362044898	0.018174441	0.296801096
NELL1	35.77870046	-1.148576939	0.486226063	-2.362228244	0.018165454	0.296801096
IQSEC3	112.8680814	-1.081446772	0.458047216	-2.360994096	0.018226021	0.297073694
TCAF1	1948.444415	-0.377165248	0.159745642	-2.361036224	0.01822395	0.297073694
GEN1	171.5601187	0.740155716	0.313734576	2.359178017	0.018315467	0.297556888
SLC7A11	138.8047334	1.007958045	0.427256527	2.359140191	0.018317334	0.297556888
TRIM71	2.023084126	1.129833703	0.478888278	2.359284523	0.018310211	0.297556888
TSR1	574.9260629	0.352555937	0.149398145	2.359841457	0.018282747	0.297556888
URM1	855.1204961	0.380988403	0.161499755	2.359064901	0.018321051	0.297556888
MIS18A	191.2745376	0.583392865	0.247477137	2.357360654	0.018405362	0.297873821
NR2F6	697.3372686	0.676584609	0.286965042	2.357724845	0.018387316	0.297873821
SOCS5	495.3152595	-0.495403207	0.210136949	-2.357525455	0.018397194	0.297873821
TCEB1	482.2091275	0.434722617	0.184344659	2.358205651	0.018363517	0.297873821
ZBTB9	203.5232068	0.324300224	0.137569978	2.357347359	0.018406021	0.297873821
AKT1	2702.643803	0.332056738	0.141301568	2.349986219	0.018774106	0.298134521
ATP5B	6468.53777	0.510987416	0.217147634	2.353179752	0.018613634	0.298134521
CAMLG	782.0512579	-0.631774638	0.269028792	-2.34835325	0.018856628	0.298134521
CCT5	2891.846547	0.65542012	0.27899117	2.349250411	0.018811251	0.298134521
CDC25A	79.5230111	0.978673306	0.415722914	2.354148097	0.018565213	0.298134521
CKAP2	354.6957671	0.754800824	0.320596843	2.354361371	0.018554563	0.298134521
CREBRF	599.8332168	-0.831211231	0.353798892	-2.349389016	0.018804249	0.298134521
CSTF2	348.4463723	0.481107603	0.204217488	2.35585898	0.018479932	0.298134521
CTNNA1	6910.911292	0.500387319	0.212766345	2.351816111	0.018682008	0.298134521
DOLPP1	264.2037656	0.61720546	0.262630267	2.350092649	0.018768739	0.298134521
ENDOU	7.989502625	-1.072958733	0.456385006	-2.350994704	0.0187233	0.298134521
FPR2	22.30089276	1.072164214	0.456147305	2.350478021	0.018749315	0.298134521
GLA	342.3525317	0.794096725	0.33822558	2.347831659	0.018883053	0.298134521
GPR135	34.238712	-0.862016903	0.366324623	-2.353150316	0.018615107	0.298134521
HIP1R	1014.450886	0.717650816	0.305111295	2.35209521	0.018667996	0.298134521
IL2RA	64.36955204	0.979915681	0.417393437	2.347702657	0.018889594	0.298134521
KIAA1107	99.81577067	-0.507625373	0.215799723	-2.352298536	0.018657794	0.298134521
KRT15	24.68683894	1.135771891	0.483903306	2.347105045	0.01891992	0.298134521
LOC100288637	62.37322328	0.801657574	0.341495692	2.347489564	0.018900403	0.298134521
LOC100289230	38.24268639	-0.754288064	0.320754376	-2.351606463	0.01869254	0.298134521
MIR503HG	43.27112193	-1.128591839	0.48077694	-2.347433381	0.018903253	0.298134521
MRPS5	585.3674557	0.230206946	0.097851807	2.352608032	0.018642274	0.298134521
MYOT	4.512769617	-1.00224352	0.426213722	-2.351504583	0.018697659	0.298134521
OAS3	1227.329174	0.825211722	0.351283548	2.349132848	0.018817192	0.298134521
PAQR6	62.95656683	0.843399286	0.358306508	2.353848639	0.018580175	0.298134521
PGPEP1L	2.305248632	-1.143170313	0.486281795	-2.350839214	0.018731126	0.298134521
PPAT	268.7755309	0.543593597	0.231219956	2.350980453	0.018724017	0.298134521
PRPF4	615.5739714	0.488834918	0.208222796	2.347653225	0.018892101	0.298134521
RNPEPL1	695.4177892	0.401946724	0.170839846	2.352769185	0.018634197	0.298134521
SLC25A39	1426.025137	0.639209329	0.272028516	2.349787947	0.018784109	0.298134521
SPOP	1100.685449	-0.397538814	0.169303059	-2.348089963	0.018869963	0.298134521
SRP14-AS1	59.64558715	-0.717394871	0.30453402	-2.355713393	0.018487175	0.298134521
TPX2	414.7951167	1.008193479	0.429548039	2.347102975	0.018920025	0.298134521
TSHZ3	818.1995157	-1.015604174	0.431640462	-2.352893818	0.018627953	0.298134521
TUBB	11056.00782	0.456258074	0.194276003	2.348504531	0.01884897	0.298134521
UNG	543.6063939	0.536549479	0.228552353	2.347599888	0.018894806	0.298134521
ZNF878	9.406442985	0.880848798	0.374088271	2.35465495	0.018539912	0.298134521
ZNHIT1	530.2992177	0.339967278	0.144843878	2.347129082	0.018918699	0.298134521
EMC8	252.5353609	0.386065661	0.164504752	2.346835917	0.018933591	0.298141815
ARPIN	858.4320666	-0.417807086	0.178128099	-2.345542831	0.018999396	0.29876451
CHM	430.6820156	-0.318927482	0.135963258	-2.345688732	0.018991961	0.29876451
ZNF343	211.1629008	-0.390166814	0.166387607	-2.34492714	0.019030798	0.299051643
ZPR1	450.7131231	0.247654034	0.105663111	2.343807897	0.019088	0.299743514
COL5A3	512.1902764	-0.983742162	0.419935821	-2.342601211	0.019149839	0.300507202
ZDHHC15	67.81602123	-1.059896962	0.452500754	-2.342309825	0.019164798	0.300534678
ADAR	6004.928025	0.305337576	0.130724749	2.335728911	0.019505375	0.300653966
AP1S3	123.8222082	0.966658863	0.413228311	2.339285177	0.019320679	0.300653966
ASPM	188.9080412	0.975959919	0.418791419	2.330420047	0.019783961	0.300653966
C10orf82	39.32272436	1.138082831	0.486543925	2.339116313	0.019329415	0.300653966
CABIN1	1913.079038	0.364926619	0.156120532	2.337467173	0.019414906	0.300653966
CD248	1441.132022	-0.937074753	0.401303733	-2.335076094	0.019539446	0.300653966
CDKN3	58.73635907	0.940502291	0.402504603	2.336624933	0.019458695	0.300653966
CELF6	126.4621571	-0.873574025	0.373450771	-2.339194595	0.019325365	0.300653966
CENPN	129.5141073	0.821646699	0.352458929	2.331184236	0.019743647	0.300653966
CHST7	64.96485183	-0.611755751	0.262032769	-2.334653616	0.019561523	0.300653966
CNTN4-AS1	0.835818273	-1.069570495	0.458180343	-2.334387567	0.019575437	0.300653966
COMT	1106.90089	0.335193919	0.14381229	2.330773815	0.01976529	0.300653966
DNAJC11	552.6633351	0.421481649	0.180644515	2.333210336	0.019637109	0.300653966
EME1	54.03508757	0.916286263	0.393088904	2.330989894	0.019753893	0.300653966
GABPA	686.0788762	-0.391971412	0.167853714	-2.335196545	0.019533156	0.300653966
GCHFR	354.8431673	1.041965917	0.446991607	2.331063718	0.01975	0.300653966
GDNF	15.78232403	-1.110494803	0.475407466	-2.335880025	0.019497495	0.300653966
GGACT	64.39611624	0.636575529	0.271998186	2.340366822	0.019264808	0.300653966
GPATCH4	471.490505	0.462860744	0.198645451	2.330084784	0.01980167	0.300653966
GPR37	86.03188853	1.067155578	0.457683754	2.331643998	0.019719427	0.300653966
KIF26B	332.5839094	1.006111271	0.429831584	2.340710427	0.019247089	0.300653966
LAP3	1731.672863	0.622731346	0.266425221	2.337358841	0.019420533	0.300653966
LOC100130992	56.01527	-1.007939589	0.432527892	-2.330345877	0.019787878	0.300653966
MYO19	409.8156493	0.521944727	0.223295436	2.337462587	0.019415144	0.300653966
NALCN	17.04702503	-1.097588576	0.468932351	-2.34061176	0.019252175	0.300653966
NHP2	912.2954492	0.333180755	0.1429966	2.329990744	0.01980664	0.300653966
NOCT	62.04846226	0.683037038	0.292823174	2.332592149	0.019669561	0.300653966
NRIP2	219.3355532	-0.825569863	0.353117507	-2.337946567	0.01939002	0.300653966
PCDHA12	7.579864019	-1.092219824	0.46841293	-2.331745677	0.019714074	0.300653966
PHF6	617.5822376	0.583567238	0.250426611	2.330292443	0.0197907	0.300653966
PLA2G3	24.27675862	1.079853824	0.461659961	2.33906753	0.019331939	0.300653966
PPM1A	1159.608343	-0.41373854	0.177148319	-2.335548777	0.019514771	0.300653966
PSMB6	906.8922371	0.355773913	0.152279242	2.33632574	0.019474271	0.300653966
PTRHD1	127.5773733	0.576821847	0.247530481	2.330306333	0.019789966	0.300653966
RBP7	88.33274299	-1.059779926	0.453461932	-2.337086866	0.019434668	0.300653966
SAC3D1	88.92648703	0.508414746	0.217683845	2.335564888	0.01951393	0.300653966
SHTN1	553.6051587	0.571513431	0.244971625	2.332978082	0.019649296	0.300653966
SLC25A18	9.366544543	-0.748227653	0.319963011	-2.338481721	0.019362273	0.300653966
SLC39A1	1862.648148	0.365928588	0.15694234	2.331611642	0.019721131	0.300653966
SLFNL1-AS1	21.82432655	-0.791282493	0.339303863	-2.332076287	0.019696678	0.300653966
STX2	273.2617845	-0.617018606	0.263747423	-2.339429897	0.019313196	0.300653966
SURF2	148.1729393	0.272358949	0.116471197	2.33842319	0.019365306	0.300653966
TMEM47	1168.48165	-0.852449229	0.365559966	-2.331899845	0.019705961	0.300653966
TP63	39.39545268	0.83719551	0.359014899	2.331924143	0.019704682	0.300653966
TPTE2P5	51.01211859	-0.520945789	0.223454164	-2.33133176	0.019735873	0.300653966
TRMT6	262.4557719	0.361302392	0.154976237	2.331340587	0.019735408	0.300653966
WDFY3-AS2	31.26992721	-0.810782785	0.347424115	-2.333697491	0.019611568	0.300653966
ZNF25	332.362788	-0.759119122	0.325661686	-2.331005317	0.019753079	0.300653966
CEACAM3	6.852737876	1.127097844	0.483964785	2.328883998	0.019865212	0.300778606
RNASEH2A	302.8863928	0.738020894	0.316838144	2.329330944	0.01984154	0.300778606
SAMD10	110.2263497	0.846803144	0.363655329	2.328587195	0.019880945	0.300778606
TIMM50	572.557814	0.457010024	0.196242517	2.328802292	0.019869542	0.300778606
TRAFD1	697.5751992	0.386408197	0.165895976	2.329219823	0.019847423	0.300778606
ADRA2B	14.97630419	-1.130609955	0.486043847	-2.326148065	0.020010653	0.30079876
ATAD3A	392.505486	0.50233733	0.215915374	2.326547298	0.019989372	0.30079876
CHMP2A	1224.752189	0.338327613	0.145434595	2.326321415	0.02000141	0.30079876
CHPF2	897.1676613	0.480816928	0.206622146	2.327034821	0.019963412	0.30079876
DUS1L	1025.647895	0.412815903	0.177491966	2.325828665	0.020027693	0.30079876
IGF2BP3	138.0137737	1.12881873	0.48497189	2.327596204	0.019933555	0.30079876
IGIP	222.1292975	-0.765395759	0.329078248	-2.325877698	0.020025076	0.30079876
PLD1	259.7736485	-0.547931458	0.235576692	-2.325915413	0.020023064	0.30079876
POP7	242.5043855	0.327636714	0.140804787	2.326886185	0.019971324	0.30079876
TRAF4	1035.523897	0.883225067	0.379570567	2.326906096	0.019970264	0.30079876
UQCC2	289.44836	0.355827641	0.152846304	2.328009459	0.019911601	0.30079876
PITPNC1	591.3719817	0.782760434	0.336656828	2.325098939	0.02006667	0.301185368
ADGRD1	410.8673774	-1.067634843	0.45936852	-2.324135842	0.020118215	0.301550706
LDHA	6823.56637	0.867090361	0.373118365	2.323901586	0.020130769	0.301550706
NMU	17.45041907	1.130200835	0.486266549	2.324241382	0.020112561	0.301550706
HTR2B	300.5560968	-1.063614996	0.457954673	-2.322533339	0.020204235	0.301856318
SFRP1	3530.106451	-1.034365027	0.445329753	-2.322694634	0.020195563	0.301856318
ZNF492	23.7206089	1.062612451	0.457446686	2.322920863	0.020183404	0.301856318
ZNF534	1.65898422	-1.128863608	0.485969117	-2.322912235	0.020183868	0.301856318
ISOC1	1166.538849	-0.639422075	0.275385481	-2.321916438	0.020237436	0.302153942
NUDT11	71.58053645	-1.05654026	0.455171537	-2.321191404	0.020276516	0.302211385
SULT1C4	146.6468426	-0.710394116	0.306058466	-2.321105921	0.020281128	0.302211385
TSSC1	302.7678524	0.640563596	0.275969428	2.3211397	0.020279305	0.302211385
CCNE2	71.03917261	0.855223891	0.368637794	2.319957161	0.020343195	0.302800046
SAMD8	655.4840566	-0.514994332	0.221991582	-2.319882259	0.020347248	0.302800046
CLEC16A	562.5810746	0.4396179	0.189526871	2.31955446	0.020364992	0.302845318
XPNPEP1	954.90406	0.579182731	0.249719367	2.319334452	0.020376909	0.302845318
BYSL	274.6565625	0.421555707	0.181812877	2.318624031	0.020415431	0.303061015
CDCA8	183.1090118	0.979412027	0.422419709	2.31857559	0.02041806	0.303061015
ATXN7L3	1197.622922	0.341452299	0.14737188	2.316943355	0.020506818	0.303191766
CRYBB1	9.152586469	1.012429438	0.436943739	2.317070476	0.020499893	0.303191766
FBLN7	97.1973623	-0.863297561	0.372582933	-2.317061477	0.020500383	0.303191766
FBXL3	841.8628996	-0.59370985	0.256143135	-2.317883122	0.020455674	0.303191766
PCNP	2075.279243	-0.431145915	0.186025466	-2.317671469	0.020467183	0.303191766
YWHAZ	8434.867376	0.482653224	0.208266485	2.317479088	0.020477649	0.303191766
FGF14	58.94354116	-1.126878904	0.486509052	-2.316254751	0.020544363	0.303264346
KRT86	19.99881263	0.971663278	0.419456063	2.316484047	0.020531854	0.303264346
PDAP1	1780.429467	0.322981964	0.139464272	2.315876029	0.020565038	0.303264346
TRAF3IP2-AS1	141.3280233	-0.818953005	0.353597595	-2.316059321	0.02055503	0.303264346
IWS1	932.9023954	0.261037693	0.112738157	2.315433394	0.020589226	0.303328355
LAMTOR1	1008.691408	0.330882916	0.142910925	2.315308762	0.020596041	0.303328355
SGPP2	198.4447507	0.937232213	0.405020402	2.314037045	0.02066569	0.304157254
CYP2A7	2.458453744	-1.123923868	0.486165657	-2.311812554	0.020788015	0.30439949
CYR61	4799.84025	-0.964543012	0.417212603	-2.3118741	0.020784622	0.30439949
NAT14	394.8249151	0.607508494	0.262814159	2.311551613	0.020802406	0.30439949
NEAT1	7135.250596	-0.695802163	0.30092918	-2.312179104	0.020767815	0.30439949
NUP85	540.787329	0.341096089	0.147557443	2.311615607	0.020798876	0.30439949
PNP	671.0032265	0.833619237	0.360440237	2.312780734	0.020734698	0.30439949
REEP1	201.9547167	-0.972493299	0.420798898	-2.311064273	0.020829305	0.30439949
TARS2	500.4722115	0.405490217	0.175409157	2.311682146	0.020795206	0.30439949
VGF	2.504865727	1.080111031	0.46734093	2.311184322	0.020822676	0.30439949
ZEB2	784.2324198	-0.853961279	0.36944951	-2.311442449	0.020808429	0.30439949
ZNF101	263.8785638	0.75880879	0.328232997	2.311799233	0.02078875	0.30439949
HRH2	29.44784453	-1.021424531	0.442043287	-2.310688932	0.020850043	0.304506982
ASTN2	100.8603777	-0.558943126	0.242119612	-2.308541309	0.020969048	0.305523007
GSTP1	5901.70871	0.628309425	0.272176354	2.308464401	0.020973321	0.305523007
LSG1	712.4276737	0.299389386	0.12969066	2.308488419	0.020971986	0.305523007
TMEM184B	1752.553711	0.594866834	0.257675635	2.308587829	0.020966464	0.305523007
PFN1	6411.373519	0.398357172	0.172582341	2.308215145	0.020987173	0.3055292
DNMT3A	860.7721208	0.635754365	0.275463836	2.307941304	0.021002401	0.305549096
PIEZO2	44.04926078	-0.892348083	0.386681581	-2.307707752	0.021015397	0.305549096
CCDC73	9.402472534	-0.720006351	0.312068364	-2.307207118	0.021043277	0.305668519
ESRRA	350.6455377	0.591803968	0.256530796	2.306950972	0.021057553	0.305668519
TOR3A	806.371059	0.479103453	0.207688477	2.306836954	0.021063911	0.305668519
USP27X	135.7702735	-0.800935129	0.347340436	-2.30590811	0.021115767	0.306225731
MIEN1	375.4169115	0.509095925	0.220893447	2.304712662	0.021182671	0.30700032
ORM1	18.96969609	-1.118830515	0.48551208	-2.304433941	0.021198297	0.307031216
C11orf98	2.515060879	1.092822885	0.474385065	2.303662079	0.02124162	0.307278481
PSMG3	281.9902779	0.485173544	0.210610917	2.303648603	0.021242377	0.307278481
IMMP1L	56.17521984	0.485862781	0.210940996	2.303311301	0.021261334	0.307357306
IQGAP3	213.537126	0.953121489	0.413909069	2.302731589	0.02129395	0.307368881
MSL2	631.719593	-0.463522286	0.201269642	-2.302991556	0.021279318	0.307368881
MTOR	1516.076117	0.539160903	0.234155438	2.302576902	0.02130266	0.307368881
APRT	724.0127519	0.466384216	0.202745074	2.300347957	0.021428515	0.307614965
CDH6	346.6352033	1.027554465	0.446599477	2.300841174	0.02140061	0.307614965
CDT1	129.6845328	0.957902367	0.416587036	2.299405127	0.021481945	0.307614965
CGRRF1	155.8162278	-0.418230739	0.181786689	-2.300667563	0.021410429	0.307614965
DSP	4009.183399	0.980241483	0.426152997	2.300210229	0.021436313	0.307614965
FCHO1	73.0579901	0.93710917	0.407464238	2.299856238	0.021456366	0.307614965
NUP205	1047.469937	0.3993816	0.173639885	2.300056807	0.021445002	0.307614965
PDSS1	53.13004783	0.668968202	0.290816593	2.300309604	0.021430686	0.307614965
PHF23	640.1655565	0.397728113	0.172853963	2.300948772	0.021394527	0.307614965
PIPOX	36.86601091	-0.917891489	0.399175381	-2.299469186	0.021478311	0.307614965
RBMS3	214.696716	-0.936471603	0.407198868	-2.299789309	0.021460159	0.307614965
REEP4	267.0413711	0.640844486	0.278478557	2.301234586	0.021378375	0.307614965
GRB2	1737.616644	0.200012744	0.087025189	2.298331623	0.021542922	0.307660298
IL1RAP	242.4722724	0.572884646	0.249254218	2.298394994	0.021539318	0.307660298
LEPR	950.585616	-1.028663159	0.447478121	-2.298801015	0.021516241	0.307660298
LRCH2	113.3468324	-1.050848067	0.457146672	-2.298710965	0.021521357	0.307660298
SCD	2628.310855	1.016397273	0.44226578	2.298159432	0.021552717	0.307660298
ASCL1	3.188399196	-1.117187764	0.486379714	-2.296945644	0.021621871	0.308180071
DNAAF5	646.1363865	0.421866422	0.183675142	2.296807375	0.021629761	0.308180071
PRKACB	729.6495889	-0.421928829	0.183668571	-2.29722933	0.021605691	0.308180071
AP3D1	2570.56028	0.37132182	0.161805079	2.294871218	0.021740506	0.308910306
CYP26A1	13.10287814	1.101365592	0.479932294	2.294835348	0.021742562	0.308910306
LINC00959	61.0983111	-0.553667554	0.241190238	-2.295563699	0.02170084	0.308910306
RBMS1	1329.138852	-0.559952637	0.243952178	-2.295337728	0.021713777	0.308910306
SLC37A1	589.2748082	0.908619965	0.395960296	2.294724934	0.021748893	0.308910306
GPR176	91.05817667	-0.780167748	0.340039289	-2.294345898	0.021770638	0.309026263
CRMP1	377.4568245	-0.68402536	0.298186931	-2.293948152	0.021793477	0.309157592
ACP2	629.859997	0.496043617	0.216263688	2.293698128	0.021807844	0.309168655
LOC148709	6.218862666	0.902903984	0.39378071	2.292910652	0.021853149	0.309506325
MPL	21.17343417	-0.889902539	0.388127236	-2.292811368	0.021858867	0.309506325
COL26A1	146.8209718	1.101285216	0.480383453	2.292512804	0.02187607	0.309557268
FAM228B	69.44899909	-0.701401246	0.306018852	-2.292019726	0.021904505	0.309767001
BST1	57.69599293	-0.840947237	0.366971568	-2.291586897	0.021929492	0.309927744
TP53RK	217.8902005	0.24306887	0.106091621	2.291122226	0.021956346	0.310114641
GADD45GIP1	402.2923735	0.370885203	0.161904078	2.290771224	0.021976649	0.31020885
AKIRIN1	769.0709379	0.401766549	0.175418801	2.290327758	0.022002324	0.3102901
PPP1R3E	146.1981323	-0.70809226	0.309187801	-2.290168819	0.022011532	0.3102901
TXNDC5	6.543515772	0.943071305	0.41182773	2.289965527	0.022023315	0.3102901
HOXD10	455.2759703	-0.984495192	0.429997423	-2.289537426	0.022048146	0.310447718
MALAT1	4432.15437	-0.786974374	0.343863924	-2.288621513	0.022101353	0.310570013
MCM5	775.6686952	0.480909906	0.210125893	2.288675132	0.022098235	0.310570013
PTPN6	633.6650589	0.672619281	0.293946055	2.288240544	0.022123517	0.310570013
SEMA4D	768.4451796	0.454775657	0.198699916	2.288756164	0.022093524	0.310570013
TMEM100	85.02374605	-1.055508349	0.461280486	-2.288213747	0.022125077	0.310570013
MAPKAPK2	1535.649393	0.308912924	0.135038986	2.287583254	0.022161802	0.310893738
ABCF2	825.0714774	0.309335033	0.135564147	2.28183513	0.022499076	0.310984435
ADAMTSL3	644.8677192	-1.058396494	0.463599392	-2.282998019	0.022430485	0.310984435
ARHGEF16	297.2190569	0.828800279	0.363243292	2.281667127	0.022509	0.310984435
BCL11A	195.1686371	0.890243065	0.389665007	2.284636932	0.022334126	0.310984435
C19orf53	952.1780612	0.410601776	0.179672457	2.28527946	0.022296447	0.310984435
DDX31	206.7056235	0.314838395	0.138067073	2.280329317	0.022588164	0.310984435
DDX49	647.1637843	0.515291265	0.225513519	2.2849684	0.022314681	0.310984435
EOMES	28.21479193	-0.663240456	0.290343974	-2.284326574	0.022352345	0.310984435
FTH1	18913.00291	0.512330272	0.224366284	2.283454815	0.022403592	0.310984435
GLIPR1L2	21.53781175	-1.02138766	0.447615458	-2.281841796	0.022498682	0.310984435
GPR50	4.864202722	-1.103245777	0.483550522	-2.281552242	0.022515789	0.310984435
KDELC2	1199.926863	-0.508041902	0.222675309	-2.28153675	0.022516705	0.310984435
KIF20A	219.3774139	0.986503253	0.431602603	2.285674941	0.022273282	0.310984435
LOC100130298	1.656145585	1.099885656	0.480920829	2.287041005	0.02219343	0.310984435
LOC100506136	5.563135291	-0.974315491	0.427170841	-2.280856739	0.022556926	0.310984435
LONP1	1366.214891	0.496626878	0.217382029	2.284581111	0.022337402	0.310984435
MBOAT7	941.3777018	0.478640885	0.209760743	2.281842055	0.022498667	0.310984435
MRPS16	995.9984338	0.461232952	0.201963688	2.283741982	0.022386699	0.310984435
NDUFA8	545.6346162	0.294869837	0.129133827	2.283443799	0.02240424	0.310984435
NFE2L3	297.3748244	0.924255404	0.405338966	2.280203682	0.022595611	0.310984435
PCSK5	334.1887267	-0.850100886	0.37284556	-2.280034894	0.022605619	0.310984435
PKM	16115.56508	0.849149805	0.372153541	2.281719002	0.022505935	0.310984435
POP1	121.7116931	0.54099346	0.236954344	2.283112648	0.022423734	0.310984435
PPP1R13L	284.7504865	0.582256789	0.254961582	2.28370402	0.022388932	0.310984435
RAB8A	956.7061139	0.405569296	0.177696715	2.282368004	0.022467623	0.310984435
RHOT1	568.8793054	-0.223447414	0.097999581	-2.280085396	0.022602624	0.310984435
SMG5	1554.242787	0.535340696	0.234709624	2.280863843	0.022556505	0.310984435
SOCS3	4593.983198	-1.086321432	0.475128838	-2.286372338	0.022232485	0.310984435
THAP5	382.0594949	-0.33561149	0.146930112	-2.284157318	0.022362287	0.310984435
USPL1	318.4234156	-0.296128889	0.129729274	-2.282668202	0.02244992	0.310984435
VAMP3	1203.96993	-0.45278268	0.198169261	-2.284828012	0.022322914	0.310984435
ZNF207	1502.338051	0.304024313	0.13326988	2.281268006	0.022532593	0.310984435
PCDHGA3	30.40183295	-1.071302475	0.470001473	-2.279359821	0.022645685	0.311347377
RAB3D	835.3748127	0.662112548	0.290530843	2.278975072	0.022668547	0.31135625
RAET1G	6.635797898	-0.925682887	0.406199297	-2.27888845	0.022673697	0.31135625
C16orf89	232.1589525	-0.99788668	0.437983751	-2.278364616	0.022704863	0.311518564
PRICKLE2-AS3	1.762544638	-1.07109536	0.470214042	-2.277888929	0.022733196	0.311518564
TMEM104	273.3623931	0.495525019	0.217534316	2.277916548	0.02273155	0.311518564
XRCC5	4832.131304	0.306921336	0.134746408	2.277770075	0.02274028	0.311518564
ADGRF1	59.90268297	1.106634576	0.486496038	2.27470419	0.022923681	0.31188191
ATP6V0D1	1326.618958	0.375162262	0.164937116	2.274577552	0.022931284	0.31188191
CDC123	802.6157143	0.529558244	0.232769316	2.275034585	0.022903855	0.31188191
COMTD1	65.13880005	0.643914678	0.282993374	2.275370157	0.022883734	0.31188191
EFCC1	74.509312	-0.940778831	0.413169468	-2.276980522	0.022787389	0.31188191
HELQ	239.8776686	-0.417966219	0.183593285	-2.276587722	0.022810857	0.31188191
KIF22	616.943116	0.61584029	0.270647032	2.27543707	0.022879724	0.31188191
METTL2A	205.271535	0.375007895	0.164750729	2.27621388	0.022833212	0.31188191
PARPBP	69.72949661	0.893681953	0.392637308	2.276100453	0.022839998	0.31188191
PGK1	6268.030348	0.799837975	0.351472854	2.275674964	0.022865471	0.31188191
PYGO1	312.5470406	-0.797627592	0.350383889	-2.276439119	0.022819741	0.31188191
SYPL1	1865.479826	-0.470515368	0.206849769	-2.274671953	0.022925616	0.31188191
SLC27A4	409.4015968	0.453202072	0.199303833	2.273925521	0.022970465	0.312156934
STARD7	1598.953178	0.246645032	0.108473351	2.273784564	0.022978943	0.312156934
KIF4A	228.6125683	0.996035146	0.43828454	2.272576499	0.023051713	0.312828909
PLK1	206.3747853	0.993795834	0.437312552	2.272506998	0.023055906	0.312828909
ITPR1-AS1	9.600860272	-0.998481957	0.439618668	-2.271245579	0.023132116	0.313675899
CSK	1032.060473	0.412157535	0.181552026	2.270189671	0.023196077	0.314168777
RAB3IP	335.0592307	0.779492808	0.343357368	2.270208481	0.023194937	0.314168777
FOXD2	12.03889429	-0.913297346	0.402630346	-2.26832715	0.023309274	0.315375905
FREM2	426.3965005	0.907377061	0.400045228	2.268186189	0.023317861	0.315375905
MIR93	0.980515129	1.099732232	0.484882257	2.268039747	0.023326784	0.315375905
CACNB4	20.97000752	-0.823523692	0.363468373	-2.265736867	0.023467499	0.31611209
CASP12	21.02036537	-1.082451169	0.478180371	-2.263688002	0.023593311	0.31611209
ELK4	797.625258	-0.420669201	0.185702805	-2.265281889	0.023495387	0.31611209
ELOVL1	860.4379513	0.392945492	0.17368064	2.262459958	0.023669	0.31611209
FAM178A	885.6833084	-0.457838051	0.202086627	-2.265553424	0.023478739	0.31611209
FSD1	13.602095	1.032003113	0.45592797	2.263522269	0.023603513	0.31611209
KIAA1328	110.746005	-0.625684689	0.276181903	-2.265480403	0.023483215	0.31611209
KLHDC4	247.7962688	0.323197911	0.142778243	2.26363558	0.023596538	0.31611209
MYL12A	2101.353674	0.359058178	0.158642828	2.263311754	0.023616478	0.31611209
NOC4L	207.5215133	0.378986174	0.167393323	2.264045946	0.023571289	0.31611209
PCMTD1	1210.419213	-0.400466974	0.176737107	-2.265890741	0.023458074	0.31611209
PIANP	189.3379575	-1.058040459	0.467423608	-2.263558024	0.023601312	0.31611209
QARS	2442.621684	0.387467662	0.171249795	2.262587601	0.023661123	0.31611209
RAD51AP1	118.0077505	0.95178353	0.420650671	2.262645931	0.023657524	0.31611209
REC8	644.5058661	0.936471182	0.413816154	2.263012626	0.023634911	0.31611209
RPS19BP1	529.2556969	0.404548341	0.178814158	2.262395469	0.023672981	0.31611209
SGPP1	255.6622079	-0.404154962	0.178354799	-2.266016753	0.023450358	0.31611209
TNFRSF12A	413.9088076	0.847124797	0.374288183	2.2632956	0.023617473	0.31611209
USP14	795.8909969	0.332303625	0.146662973	2.265763591	0.023465862	0.31611209
WNT6	13.29303421	-0.741990125	0.327788757	-2.263622862	0.02359732	0.31611209
YARS2	287.9062611	0.496605891	0.219156954	2.265982816	0.023452435	0.31611209
AGPAT9	81.26663963	-0.960191881	0.424548477	-2.261677835	0.023717315	0.316386969
ZC3H15	960.5965286	0.300294896	0.132779129	2.261612176	0.023721375	0.316386969
ALDH1L1-AS2	5.104938467	-1.099949612	0.486530675	-2.260802183	0.023771509	0.3165592
ALG10	96.67637675	0.556900475	0.247363794	2.251341907	0.024363891	0.3165592
AP1M2	957.4593659	0.951243447	0.421916924	2.254575232	0.024160004	0.3165592
ATOX1	305.2626455	0.423266421	0.188027818	2.251084046	0.024380215	0.3165592
CASQ1	11.66977183	-0.951770911	0.422757417	-2.251340538	0.024363977	0.3165592
CCBE1	306.7297025	-1.085622619	0.482046002	-2.252114142	0.02431506	0.3165592
CD3EAP	42.08219734	0.628517618	0.278948495	2.253167263	0.024248605	0.3165592
CIR1	563.7498125	-0.371226575	0.164623084	-2.255009241	0.024132749	0.3165592
CLCA4	12.47755256	1.094009818	0.485865699	2.251671232	0.024343056	0.3165592
CLPB	238.9650021	0.441062897	0.19519551	2.259595505	0.023846367	0.3165592
CPZ	575.0923896	-0.914960589	0.405521299	-2.25625779	0.024054491	0.3165592
CRTAP	3309.061171	-0.675112887	0.299729809	-2.252404888	0.024296697	0.3165592
DPCD	460.8940004	0.788779601	0.350480257	2.250567859	0.024412921	0.3165592
DTD1	349.4730382	0.384615457	0.170829503	2.251458031	0.024356542	0.3165592
EEA1	687.8309658	-0.405099274	0.179426298	-2.257747494	0.023961406	0.3165592
ELMOD1	8.622508982	-1.080554734	0.480182499	-2.250300118	0.0244299	0.3165592
EPPIN	11.77166764	-1.09607315	0.485240201	-2.258825933	0.023894215	0.3165592
ETFA	817.7555788	0.315933645	0.140129754	2.254579321	0.024159747	0.3165592
GBP5	453.7851927	0.992108211	0.439470945	2.257505809	0.023976487	0.3165592
GTF3C6	564.5118393	0.508040068	0.225460034	2.253348671	0.024237173	0.3165592
HAL	10.32838945	0.805405519	0.357703571	2.251600446	0.024347533	0.3165592
HMGA2	101.2297694	1.093039868	0.483592914	2.2602479	0.02380587	0.3165592
LINC00310	6.303049807	-1.059967624	0.469344534	-2.258399846	0.023920742	0.3165592
LINC00936	35.59371101	-0.718292978	0.318383415	-2.256062799	0.024066699	0.3165592
LINC01278	465.6314852	-0.24690952	0.109543657	-2.253982805	0.02419725	0.3165592
LOC100507351	40.51322761	-1.022451264	0.452577574	-2.259173505	0.023872594	0.3165592
MAP3K9	176.8614467	0.861611868	0.38210322	2.254919151	0.024138404	0.3165592
MCMDC2	16.86747479	-0.80836392	0.357907732	-2.258581885	0.023909406	0.3165592
MIR24-2	1.113939721	-1.070665826	0.473912132	-2.259207462	0.023870483	0.3165592
MUCL1	1.374220926	-1.068980515	0.474565331	-2.252546584	0.024287752	0.3165592
PCBP3	99.92656129	-1.058902933	0.470113581	-2.252440638	0.02429444	0.3165592
PIH1D1	956.2415117	0.464004687	0.205946798	2.253031813	0.024257143	0.3165592
PMM2	471.1144818	0.610771543	0.270963378	2.254074137	0.024191504	0.3165592
PSMA2	1121.923491	0.445031775	0.1974214	2.254222563	0.02418217	0.3165592
RAB23	900.3068792	-0.866759887	0.384768737	-2.252677525	0.024279489	0.3165592
RANBP1	647.1727198	0.540562245	0.239582849	2.25626437	0.024054079	0.3165592
RNF103	739.7447629	-0.542387612	0.240345575	-2.256698976	0.024026891	0.3165592
SARS2	335.6080361	0.540228311	0.239433093	2.256280891	0.024053045	0.3165592
SBNO2	1409.973885	0.492705765	0.218949433	2.250317609	0.024428791	0.3165592
SLC1A2	83.35617672	-0.874267684	0.38849695	-2.250384934	0.024424521	0.3165592
SLC2A6	88.62873687	0.807329775	0.357337117	2.259294474	0.023865073	0.3165592
SOX4	4472.529361	0.742650244	0.328546948	2.260408286	0.023795923	0.3165592
SYMPK	1791.965582	0.391613951	0.173708442	2.254432465	0.024168975	0.3165592
TOP2A	1393.268372	1.025277547	0.454927443	2.253716635	0.024214	0.3165592
VPS72	696.31945	0.313647656	0.138855376	2.258808158	0.023895321	0.3165592
WNT3	11.15824592	-0.885042197	0.392248559	-2.256330015	0.024049971	0.3165592
ZBED2	31.63781457	1.016453518	0.450667226	2.255441397	0.024105637	0.3165592
ZNF296	17.92124383	0.875792543	0.387403509	2.260672714	0.023779531	0.3165592
ZNF302	421.3236615	-0.580953544	0.257507748	-2.256062388	0.024066724	0.3165592
ZSCAN5A	66.8868359	0.483549983	0.214583564	2.253434387	0.024231773	0.3165592
FAAP24	39.06738789	0.688025502	0.305839351	2.249630402	0.024472417	0.316601717
PHYHIP	194.6793059	-1.02009942	0.453459961	-2.249590942	0.024474924	0.316601717
TRIQK	327.1521383	-0.347011797	0.15423906	-2.249830859	0.024459684	0.316601717
TXNRD3	122.0408612	-0.492665345	0.219025704	-2.249349436	0.024490273	0.316620267
KL	47.38376435	-0.964057935	0.428650237	-2.249054947	0.024509	0.316682451
DPYD	400.0887227	-0.88385906	0.39320611	-2.247826365	0.024587264	0.316973714
FLJ43879	0.685819542	-1.045421616	0.465034524	-2.248051622	0.024572898	0.316973714
RABIF	167.5102393	0.434207029	0.193163592	2.247871991	0.024584354	0.316973714
SERPINF1	3036.387597	-0.960876294	0.427454478	-2.247903211	0.024582362	0.316973714
FEM1A	557.3018301	0.331126744	0.14732787	2.247549929	0.024604903	0.317021502
SMAD4	1543.386601	-0.330777838	0.147227681	-2.246709553	0.024658595	0.31753349
QPCTL	206.8640322	0.574869556	0.255900855	2.246454218	0.024674929	0.317564101
ADGRL4	371.968996	-0.841983836	0.375299699	-2.243497231	0.024864768	0.317586993
AFAP1L2	873.557824	-0.846364589	0.37690941	-2.245538492	0.024733584	0.317586993
ANKAR	46.34077914	-0.637955134	0.284346139	-2.243586413	0.024859024	0.317586993
CBLN4	29.39525115	-1.004152428	0.447418062	-2.244326982	0.024811371	0.317586993
GIPC3	65.70801356	-0.842111752	0.37541203	-2.243166669	0.024886069	0.317586993
ITFG3	1696.113285	0.548648084	0.244381617	2.245046459	0.02476515	0.317586993
LINC01391	31.84211403	-0.988583248	0.440547512	-2.243987814	0.024833185	0.317586993
MAGOHB	199.4056717	0.327978908	0.146077067	2.245245707	0.024752363	0.317586993
NARFL	400.8533854	0.303114801	0.135079715	2.243969793	0.024834345	0.317586993
NTMT1	152.7787468	0.370046298	0.164821991	2.245126978	0.024759982	0.317586993
PHLDA2	54.36300518	0.877135914	0.390714834	2.24495166	0.024771236	0.317586993
PPP6R1	1705.869051	0.372533548	0.166073677	2.243182388	0.024885056	0.317586993
PREP	645.6856693	0.496738283	0.221329945	2.244333829	0.024810931	0.317586993
RAN	3272.158219	0.585633475	0.260959236	2.24415692	0.024822307	0.317586993
SDHAF3	255.6220598	0.63182302	0.281411736	2.245190728	0.024755891	0.317586993
LOC100506022	27.1993346	-0.788363138	0.351601437	-2.242206813	0.024948009	0.31819899
PKD1L2	58.71500985	-0.916923693	0.409041591	-2.241639267	0.024984696	0.318488388
TFPT	318.7001477	0.503741407	0.224778273	2.24105915	0.025022244	0.31878843
KLHL15	258.8649213	-0.485222144	0.216576824	-2.240415831	0.025063939	0.31896246
TPMT	395.9112887	0.508850606	0.227119909	2.240449148	0.025061779	0.31896246
DNA2	127.8936028	0.901880285	0.402632328	2.239959942	0.025093524	0.319019174
EPT1	593.8141319	0.636384032	0.284129991	2.239763668	0.02510627	0.319019174
ZNF8	97.24705613	0.565002058	0.252266936	2.239699207	0.025110457	0.319019174
MEMO1	332.4826177	0.437736943	0.195464318	2.239472389	0.025125196	0.319028297
MAPRE3	356.3837889	-0.662308502	0.295826642	-2.238839942	0.025166332	0.319247463
TP53I3	431.6648154	0.835435287	0.373166148	2.238775652	0.025170517	0.319247463
SNRPD1	576.9279758	0.568647218	0.25404439	2.238377385	0.025196456	0.319398412
SFXN5	242.426956	0.525838321	0.235037979	2.237248313	0.025270115	0.320153788
KU-MEL-3	2.79521375	-1.074814102	0.480541487	-2.23667286	0.025307729	0.320451902
ATP1A4	3.120822786	-1.086429554	0.486094883	-2.235015408	0.025416337	0.321471524
ZNF695	12.26499729	1.021458708	0.457025893	2.235012774	0.02541651	0.321471524
C8orf46	9.956739058	-0.928525655	0.415666444	-2.233823942	0.02549466	0.321923132
MRPL32	484.4756246	0.31153626	0.139461453	2.233852103	0.025492806	0.321923132
RNF113A	173.0968879	0.22986577	0.102893226	2.234022394	0.0254816	0.321923132
BSPRY	352.4923316	1.002338942	0.448998124	2.232390043	0.025589195	0.321977922
CTNNA3	40.78583974	-1.08579583	0.486272223	-2.232897089	0.025555732	0.321977922
EPHB6	322.939491	-0.971529177	0.435370178	-2.231501434	0.025647933	0.321977922
GKAP1	124.2059715	-0.644316814	0.288750045	-2.231399878	0.025654653	0.321977922
HLA-J	35.67460953	-0.669890442	0.300117666	-2.232092666	0.025608839	0.321977922
ME3	236.6317603	-0.811322367	0.3633412	-2.232948992	0.025552308	0.321977922
PYCR2	1242.25185	0.173399665	0.077677161	2.232312068	0.025594345	0.321977922
RPL28	8677.17687	0.486236522	0.217846345	2.232015972	0.025613907	0.321977922
SLC25A53	40.17273078	0.579093595	0.259344	2.23291688	0.025554426	0.321977922
STAT2	1982.167336	0.526177961	0.2358006	2.231453023	0.025651136	0.321977922
YARS	919.3020701	0.5539067	0.248018732	2.233326073	0.025527449	0.321977922
COPS5	688.5349235	0.417968683	0.18735087	2.230940707	0.025685057	0.322181799
SH2D3A	192.122277	0.776846239	0.348295141	2.230425137	0.025719232	0.322432734
DDX41	891.852292	0.326427496	0.146372189	2.230119658	0.0257395	0.322509133
MRO	8.424982406	-0.874421612	0.392199973	-2.229530017	0.02577866	0.322822035
CCSER1	53.4073515	0.77001087	0.345412253	2.229251753	0.025797159	0.322875991
MEF2C	572.3043876	-0.903215367	0.405229479	-2.22889847	0.025820661	0.322992479
ICA1	443.5059404	0.747465467	0.335549619	2.227585505	0.025908168	0.323909043
EXOSC5	228.0684903	0.527161832	0.236771351	2.226459537	0.025983416	0.323947789
FPGS	884.3312007	0.32167897	0.144462567	2.226728882	0.025965399	0.323947789
GNAQ	1492.776183	-0.313055141	0.140561854	-2.227169969	0.025935916	0.323947789
HNRNPL	4047.683424	0.35898562	0.161250448	2.226261225	0.025996689	0.323947789
LPAR2	316.0543955	0.837407844	0.376090639	2.226611772	0.025973231	0.323947789
SLC35D1	355.1822402	-0.377144428	0.169368076	-2.226774007	0.025962381	0.323947789
GDE1	1000.890598	0.575612945	0.258611485	2.225782608	0.026028746	0.324169728
GGCT	766.3934827	0.653618786	0.293784911	2.224820814	0.02609327	0.324795544
C1RL	1090.602107	0.436855484	0.196526519	2.222883134	0.026223681	0.325171092
CALR	14232.13588	0.606908966	0.27321208	2.221384083	0.026324958	0.325171092
DEPTOR	1335.582747	0.789304918	0.355517554	2.220157368	0.026408087	0.325171092
E2F8	80.95790115	0.971040499	0.436912948	2.222503368	0.026249307	0.325171092
IGFBP3	11842.47685	-0.88191823	0.397104103	-2.220874133	0.026359488	0.325171092
IL23A	20.67865854	0.810788613	0.364705213	2.223134146	0.026206756	0.325171092
IRS1	2052.657144	-0.758224342	0.341364058	-2.221160443	0.026340096	0.325171092
JUN	8783.461043	-0.979125398	0.440510334	-2.222706991	0.026235564	0.325171092
LOC101928034	10.8747411	-1.073600381	0.483498219	-2.220484664	0.026385886	0.325171092
MCOLN3	116.6972091	-0.941454972	0.423934647	-2.220754965	0.026367562	0.325171092
PCDHB15	132.4987851	-1.011918704	0.455790459	-2.220140164	0.026409255	0.325171092
PSMG3-AS1	104.9137285	-0.564102716	0.253731563	-2.223226429	0.026200536	0.325171092
RNF41	724.0712527	0.326861681	0.147137724	2.221467567	0.026319309	0.325171092
SLC26A6	253.3301354	0.515001137	0.231923657	2.220563193	0.026380561	0.325171092
TBCE	188.0510909	0.383104045	0.172371982	2.222542441	0.026246669	0.325171092
THBS4	898.1509548	1.078372591	0.484952812	2.223664991	0.026170992	0.325171092
TRAF2	345.8370864	0.307030418	0.138172105	2.222086848	0.026277437	0.325171092
ZDHHC17	692.62783	-0.546636838	0.246078715	-2.221390167	0.026324546	0.325171092
ZNF711	211.6144733	-0.629175197	0.28334491	-2.220527615	0.026382973	0.325171092
ZXDB	262.1097016	-0.326984625	0.147222373	-2.221025365	0.026349243	0.325171092
MLK7-AS1	11.89590638	-0.806325513	0.36335801	-2.219093815	0.026480343	0.325870048
ARID4A	454.8317843	-0.409082383	0.184423827	-2.218164491	0.026543619	0.326215839
CAPNS1	4050.541647	0.454202898	0.204872139	2.217006673	0.026622636	0.326215839
CTD-2201I18.1	17.59690144	0.98181342	0.443157941	2.215493235	0.026726228	0.326215839
FFAR2	13.97792765	1.074482932	0.484533068	2.217563678	0.026584597	0.326215839
FGFR1	3500.771814	0.472778364	0.213114313	2.218426145	0.02652579	0.326215839
GRIN2B	2.185693175	0.969409241	0.437127983	2.217678298	0.026576775	0.326215839
KATNAL1	345.5241539	-0.809861763	0.365569909	-2.215340333	0.026736713	0.326215839
LINC00930	29.33263925	0.857031342	0.386793362	2.215734355	0.026709701	0.326215839
MDFIC	519.736736	-0.884703689	0.399100486	-2.216744203	0.026640576	0.326215839
PET100	373.8933886	0.45278812	0.20434396	2.215813567	0.026704273	0.326215839
PNO1	287.3767852	0.426249469	0.192409532	2.215324081	0.026737828	0.326215839
RBX1	657.7107312	0.40819993	0.184209669	2.215952787	0.026694736	0.326215839
RNF38	962.4455029	-0.544106142	0.245441857	-2.216843325	0.0266338	0.326215839
RRAGB	303.3488167	-0.453313364	0.204603564	-2.215569248	0.026721017	0.326215839
TTLL4	345.826855	0.446213415	0.201312721	2.216518724	0.026655997	0.326215839
ZNF507	497.1380922	-0.343025587	0.154780814	-2.216202238	0.026677655	0.326215839
ABHD12	716.896743	0.397923239	0.179757566	2.213666151	0.026851753	0.326380764
ASF1B	260.3369297	1.007193745	0.45484005	2.21439107	0.026801889	0.326380764
DDX39A	769.6290957	0.582173339	0.262964246	2.213887815	0.026836497	0.326380764
FRAT2	295.6564825	0.736987973	0.332807454	2.214457528	0.026797321	0.326380764
RPS2	17129.32564	0.528225871	0.238601132	2.213844779	0.026839459	0.326380764
SAG	7.966831286	-1.067381459	0.481927735	-2.214816415	0.026772668	0.326380764
9-Sep	5820.055722	0.488433355	0.220610615	2.214006587	0.026828326	0.326380764
C17orf53	69.00606787	0.77502462	0.350222461	2.212949499	0.026901128	0.326772168
CDC20	336.8329498	0.973967112	0.440208584	2.212512765	0.026931255	0.326772168
CLPSL1	4.694401964	0.997879669	0.450990531	2.212639955	0.026922478	0.326772168
RFC3	327.4578317	0.570441781	0.257842431	2.212365817	0.026941399	0.326772168
HYOU1	4594.7279	0.667082838	0.301580341	2.211957303	0.026969615	0.326913878
IGFBP7-AS1	2.365719894	-1.050659611	0.475028822	-2.211780762	0.026981817	0.326913878
SMG7	1534.367768	0.295863373	0.133784189	2.211497304	0.027001418	0.326977261
DNAJB11	1019.461408	0.570915437	0.258260685	2.210616906	0.027062377	0.327096083
FAXC	78.85312678	-0.691578574	0.312818158	-2.210800609	0.027049648	0.327096083
MTMR9	282.5034073	-0.42096364	0.190404878	-2.210886846	0.027043674	0.327096083
PCDHA6	13.33452807	-0.983512431	0.44492251	-2.210525225	0.027068732	0.327096083
TTC6	37.57643995	1.048120035	0.474260226	2.210010406	0.02710444	0.327353732
FZD8	276.9014992	0.954943421	0.432153932	2.209729798	0.02712392	0.327415218
MYADM	3516.918696	-0.736190944	0.33321595	-2.209350856	0.027150246	0.32755923
RNF7	757.3195993	0.338647859	0.153294894	2.209126801	0.027165822	0.327573463
CDC26	371.106611	0.263471465	0.119308201	2.208326515	0.02722152	0.327730178
CDK16	1385.222961	0.411661135	0.186413781	2.20831922	0.027222028	0.327730178
MAF	1005.422757	-0.902100708	0.408437091	-2.208665002	0.02719795	0.327730178
TRAP1	1633.487216	0.382812479	0.173373058	2.208027503	0.027242356	0.327801464
TSEN54	333.4191323	0.426880848	0.193362638	2.207669752	0.027267303	0.327928229
KLHL18	381.5353074	0.367721934	0.166586348	2.207395374	0.027286449	0.327959773
MRPL47	312.9999737	0.48687963	0.220585088	2.207219153	0.027298752	0.327959773
ACCS	290.3646672	-0.531360291	0.240860401	-2.206092361	0.027377533	0.328498674
CXCL9	664.6254197	1.071464435	0.48580459	2.205546133	0.027415794	0.328498674
IPO4	978.2170845	0.537449152	0.243671395	2.205630878	0.027409855	0.328498674
LILRB3	37.29333487	0.78745149	0.357005081	2.205715082	0.027403955	0.328498674
MFSD3	208.2171879	0.786195612	0.35641528	2.20584149	0.0273951	0.328498674
A2M-AS1	66.58461349	-0.966679138	0.438357194	-2.205231602	0.027437847	0.328589875
ARMS2	2.170486047	1.044600866	0.474871725	2.199753769	0.02782437	0.328720512
ATP1A1-AS1	79.03758514	-0.58185559	0.264006515	-2.20394406	0.027528278	0.328720512
BBS10	287.9846986	-0.419614186	0.190740865	-2.1999176	0.027812742	0.328720512
BCR	1467.025935	0.440817836	0.20018213	2.20208385	0.027659386	0.328720512
CDK5	183.5372041	0.552475782	0.250812859	2.202741053	0.027613005	0.328720512
CDPF1	146.677689	-0.445406314	0.202101119	-2.203878522	0.027532888	0.328720512
DDOST	3764.333917	0.484500268	0.219867552	2.203600596	0.027552445	0.328720512
FAM96B	640.4149864	0.388555705	0.176503441	2.201405832	0.027707307	0.328720512
FBP2	2.703616965	1.020441258	0.463137914	2.203320494	0.027572168	0.328720512
GPS1	1274.5742	0.288970465	0.131152496	2.203316543	0.027572446	0.328720512
MAP2K3	758.907618	0.56887519	0.258025155	2.204727639	0.027473212	0.328720512
MEF2BNB	64.07555371	0.367348504	0.166828334	2.201955123	0.027668479	0.328720512
MSH2	609.578579	0.51942147	0.23598057	2.201119655	0.027727554	0.328720512
NDUFB9	985.0753449	0.400637803	0.182003947	2.201258869	0.027717703	0.328720512
OR2W3	1.014308653	-1.068833828	0.485474337	-2.201627863	0.027691606	0.328720512
PAK3	40.49824844	-1.014596254	0.461155463	-2.200117607	0.027798552	0.328720512
PRR15L	245.7147218	0.885397709	0.402109267	2.201883374	0.027673548	0.328720512
PSMB4	2403.433886	0.400529363	0.1817932	2.203214214	0.027579654	0.328720512
RAB33B	241.7794707	-0.534696263	0.243036407	-2.200066527	0.027802175	0.328720512
SENP7	584.9557603	-0.501934865	0.228046627	-2.201018583	0.027734708	0.328720512
SKIDA1	16.13214355	-1.014986627	0.461193524	-2.20078248	0.027751426	0.328720512
SLX4	224.3674616	0.512039201	0.232282465	2.204381642	0.027497516	0.328720512
SNX18	633.3131199	-0.498222295	0.226449695	-2.20014558	0.027796568	0.328720512
TOMM22	695.5916729	0.403852983	0.183531342	2.200457853	0.027774427	0.328720512
VIPR2	132.1894997	-0.874595779	0.397128367	-2.202299942	0.027644128	0.328720512
WDR18	409.2787835	0.536232612	0.243302043	2.203979078	0.027525816	0.328720512
ZNF781	33.81303478	-0.99736456	0.453537489	-2.19907854	0.027872338	0.329116338
LRFN4	263.072355	0.787964752	0.358354222	2.198843224	0.027889072	0.329143123
IRAK1BP1	140.7586339	-0.302641638	0.137669065	-2.198327113	0.027925804	0.329332761
PDZRN4	17.23373703	-1.064455498	0.484237226	-2.198210798	0.027934088	0.329332761
ARHGAP11A	280.9573591	0.879233366	0.400227188	2.196835678	0.028032184	0.329900737
GALNT10	1800.219227	0.868024786	0.395114976	2.196891636	0.028028186	0.329900737
GYPE	6.773855807	-1.033331845	0.470393249	-2.19674038	0.028038993	0.329900737
TECPR1	567.0835112	0.281882367	0.128319505	2.196722685	0.028040258	0.329900737
CENPA	45.80839504	1.00249026	0.456563187	2.195731696	0.028111153	0.330052207
GAB1	606.7205166	-0.791043283	0.360215449	-2.196028196	0.028089925	0.330052207
MATN1-AS1	23.49819485	-0.779211642	0.354779862	-2.196324326	0.028068738	0.330052207
SSH2	396.2057257	0.453183432	0.206390884	2.195753141	0.028109617	0.330052207
BPNT1	431.2657408	0.462924102	0.211133128	2.192569709	0.028338396	0.331099797
CASC10	10.05975679	-0.92341657	0.421027801	-2.193243695	0.028289826	0.331099797
ELFN1	61.86952671	-0.87506856	0.399016835	-2.193061756	0.02830293	0.331099797
FOXM1	353.9704274	0.979086878	0.446375528	2.193415222	0.028277477	0.331099797
GYS1	904.8502799	0.525896311	0.239759162	2.19343572	0.028276001	0.331099797
NAALAD2	125.9659881	-1.039891309	0.474294362	-2.192501942	0.028343283	0.331099797
OTUD1	263.1912413	-0.796956175	0.363497657	-2.192465785	0.028345891	0.331099797
PSMA5	1173.837297	0.510192419	0.232594658	2.193482961	0.028272601	0.331099797
SYN3	4.499472711	-0.971002169	0.442839492	-2.192672939	0.028330952	0.331099797
USP54	865.9098525	0.652417723	0.297486038	2.193103676	0.02829991	0.331099797
DCAF13	539.2422964	0.596194629	0.272004491	2.191855832	0.028389918	0.331378383
MYBL2	377.5853596	1.004336497	0.458280886	2.191530408	0.028413432	0.331378383
PPP2R5C	1452.143248	-0.215099347	0.098144347	-2.191663123	0.02840384	0.331378383
CFAP97	711.7624526	-0.33739346	0.153978723	-2.191169355	0.028439539	0.33151295
DSG2	1483.208344	0.752933978	0.343700761	2.190667186	0.028475885	0.331575122
MRVI1	1946.171172	-1.006134631	0.459319689	-2.190488792	0.028488807	0.331575122
PPFIBP2	392.2215908	0.421347273	0.192344883	2.190582173	0.028482042	0.331575122
SYCP2	27.91524535	-0.812077212	0.370762299	-2.190290691	0.028503162	0.331575122
GALNT14	96.48491396	1.056677702	0.482678927	2.189193776	0.028582759	0.331822498
KCNA6	7.275338163	-0.888934878	0.406047386	-2.18923926	0.028579455	0.331822498
TMEM248	2020.081904	-0.302117236	0.137970505	-2.189723343	0.028544307	0.331822498
TUBG1	472.9182038	0.564735361	0.257932277	2.189471467	0.02856259	0.331822498
DCUN1D5	374.9799936	0.334925034	0.153019571	2.188772532	0.028613377	0.332008559
NMT2	342.0316304	-0.632115283	0.288835544	-2.188495483	0.02863353	0.332073058
C11orf31	654.1724797	0.437235546	0.199807503	2.188283924	0.028648927	0.332082369
AMMECR1	295.3994818	0.650186778	0.29750351	2.185475991	0.028853964	0.332284317
BATF2	123.0118124	0.964486472	0.441401201	2.185056292	0.028884719	0.332284317
CST6	12.95303699	1.043735746	0.477680972	2.185005909	0.028888413	0.332284317
FAM156A	21.30418208	-0.585341766	0.267769713	-2.185989443	0.028816378	0.332284317
HOXA11	1353.984778	-0.817623356	0.373803081	-2.187310371	0.028719874	0.332284317
HOXA11-AS	225.9897088	-0.856216846	0.391959361	-2.184453111	0.028928969	0.332284317
IL13RA2	5.555765961	-1.052077717	0.481596389	-2.184563134	0.028920893	0.332284317
ISM2	25.94800675	-1.000639726	0.458036056	-2.18463091	0.02891592	0.332284317
KIR2DL4	9.150580762	1.049638088	0.480461055	2.184647593	0.028914695	0.332284317
MAPKAP1	1033.561842	0.195549539	0.089404091	2.18725494	0.028723918	0.332284317
MELK	176.3666284	0.981974689	0.448878128	2.18761982	0.028697307	0.332284317
MORC2	842.4461546	0.332347479	0.151989772	2.186643705	0.028768544	0.332284317
MVB12A	423.9484418	0.386893667	0.177112635	2.184449838	0.028929209	0.332284317
SMAD7	439.1849049	-0.494951259	0.226456596	-2.185634106	0.028842385	0.332284317
TWIST2	102.4120204	-0.910648852	0.416550384	-2.18616736	0.028803363	0.332284317
TXNDC15	863.0022659	-0.483109329	0.221120398	-2.184824797	0.028901695	0.332284317
YBX1	8103.421823	0.466272762	0.213416406	2.184802801	0.028903309	0.332284317
ZNF281	334.1473739	0.224704518	0.102750051	2.186904195	0.028749519	0.332284317
FAM124B	27.9636682	-0.876704481	0.40145639	-2.183810005	0.028976212	0.332488517
HDAC3	793.0820052	0.217246033	0.099478808	2.183842342	0.028973835	0.332488517
PSMA4	1492.470331	0.444306873	0.203484044	2.183497361	0.028999203	0.33258461
N6AMT2	102.7679646	-0.360097753	0.165001207	-2.182394652	0.029080419	0.333348034
CCNJL	78.28386322	0.956014907	0.438180304	2.181784299	0.029125456	0.333363343
MFF	704.2812833	-0.294047545	0.134762466	-2.181969162	0.029111809	0.333363343
NBL1	10.85780458	-1.031743238	0.472890397	-2.181780905	0.029125707	0.333363343
CDC6	255.7365895	0.959097613	0.439665467	2.181425844	0.029151934	0.333495778
TYK2	1386.578317	0.3302752	0.151433	2.180998863	0.029183501	0.333689132
ACTL10	25.62618952	0.613138955	0.281214678	2.180323442	0.029233495	0.33375762
ADAM17	578.4752128	0.501457302	0.229955748	2.180668697	0.02920793	0.33375762
TIMM23	221.2414755	0.532704644	0.244314311	2.180407036	0.029227303	0.33375762
TGM2	10551.15921	-0.905577665	0.415408051	-2.179971385	0.029259583	0.333887936
COPZ2	118.7986893	-0.813336909	0.373129198	-2.179772888	0.029274301	0.333888439
CLPTM1L	1166.800574	0.307724179	0.141243297	2.178681653	0.029355326	0.334477255
ZXDA	112.43827	-0.612508121	0.281124839	-2.178776244	0.029348295	0.334477255
PIGO	626.3506895	0.397760531	0.182587013	2.178471098	0.029370982	0.334488147
FLJ23867	403.9495211	0.820176336	0.37653759	2.17820573	0.029390724	0.334545536
[truncated: 24,365 more rows]
