# Supplementary material for: RNA-seq Reveals the Overexpression of IGSF9 in Endometrial Cancer
Source: J Oncol. 2018 Feb 14;2018:2439527. doi: 10.1155/2018/2439527 (PMC5832105; doi:10.1155/2018/2439527)
Supplement: Supplementary 4 — Supplementary Table 4: differentially expressed genes from reanalyzing data of Xiong et al. [file 2439527.f4.csv]

	baseMean	log2FoldChange	lfcSE	stat	pvalue	padj
WISP2	2937.492891	-7.120415672	0.483686633	-14.72113387	4.72E-49	8.29E-45
FXYD1	529.7033746	-4.560572959	0.415404553	-10.97863016	4.84E-28	4.26E-24
ATP1A2	526.9449074	-5.77500152	0.530800684	-10.87979291	1.44E-27	8.43E-24
HOXA13	480.3723242	-5.910537447	0.548051072	-10.78464718	4.07E-27	1.79E-23
LGI4	593.7386023	-4.39460984	0.4566705	-9.623152458	6.38E-22	2.25E-18
ITGA8	1841.53816	-4.82588385	0.519498846	-9.289498695	1.55E-20	4.54E-17
DIO3	489.3666858	-4.728344648	0.514095982	-9.19739662	3.67E-20	8.06E-17
RIC3	182.1743921	-5.327716902	0.578744727	-9.205642232	3.40E-20	8.06E-17
ENPP2	3804.035911	-3.309773787	0.360888277	-9.171186761	4.68E-20	9.14E-17
PTGDS	7571.798898	-4.251215195	0.468391005	-9.076210143	1.12E-19	1.98E-16
CBX7	1705.688777	-3.25420302	0.3682452	-8.837054828	9.83E-19	1.57E-15
IGFBP5	36331.36989	-3.914477243	0.445728371	-8.782203469	1.60E-18	2.35E-15
LRFN5	334.9693195	-4.948143667	0.583289991	-8.483162314	2.19E-17	2.96E-14
APOD	8390.639623	-3.994102338	0.484940488	-8.236273177	1.78E-16	2.08E-13
PER3	1208.638085	-2.994103685	0.363181903	-8.244088321	1.66E-16	2.08E-13
CYBRD1	8189.101896	-3.439608213	0.41901538	-8.208787498	2.23E-16	2.46E-13
CYP1B1	1892.653751	-3.263530717	0.414154453	-7.879984621	3.27E-15	3.39E-12
TGFBR3	3241.143844	-3.706791091	0.4725483	-7.844258648	4.36E-15	4.25E-12
GPRASP1	869.317632	-3.145371935	0.402549077	-7.813635945	5.56E-15	4.65E-12
NOVA1	549.9864375	-4.097346085	0.524127112	-7.817466392	5.39E-15	4.65E-12
OGN	2043.320459	-5.390368433	0.689854332	-7.813777759	5.55E-15	4.65E-12
SCN2B	97.1815928	-6.515972438	0.837594515	-7.779387665	7.29E-15	5.82E-12
MAN1C1	924.7633526	-2.961371201	0.381995084	-7.752380399	9.02E-15	6.89E-12
PPAP2B	6746.206158	-2.740779368	0.353844622	-7.745714353	9.50E-15	6.96E-12
NXPH3	360.3024459	-4.099509864	0.531877419	-7.707621557	1.28E-14	9.01E-12
ABCG2	814.4818804	-3.329983519	0.432328151	-7.702444345	1.33E-14	9.03E-12
FAR2P1	407.6494697	3.639404997	0.473068774	7.693183737	1.44E-14	9.35E-12
FOXA1	551.7292922	4.05282344	0.531000455	7.632429318	2.30E-14	1.45E-11
ADAMTS9-AS2	194.6572128	-3.899504765	0.513607623	-7.592381017	3.14E-14	1.84E-11
CYP2B7P	652.5665832	-5.333174106	0.702269569	-7.594197928	3.10E-14	1.84E-11
PRELP	4362.694212	-4.585273303	0.606712572	-7.557570946	4.11E-14	2.33E-11
BCHE	351.164311	-5.576062812	0.745066819	-7.483976828	7.21E-14	3.93E-11
LIFR	2288.552453	-2.846363373	0.380472887	-7.481120137	7.37E-14	3.93E-11
ADAMTSL3	378.6951646	-3.719248968	0.497616124	-7.474132743	7.77E-14	4.02E-11
SIX2	82.47568186	-6.06110035	0.81457461	-7.440816682	1.00E-13	5.03E-11
UNC5D	94.21686544	-4.95693151	0.668127938	-7.419135214	1.18E-13	5.76E-11
RELN	539.5499051	-3.851223736	0.519752002	-7.409733342	1.27E-13	6.01E-11
F10	629.9044338	-3.684609614	0.499724654	-7.373279633	1.66E-13	7.70E-11
PODN	1913.099019	-4.423401933	0.604598238	-7.316266667	2.55E-13	1.15E-10
SFRP4	17764.92005	-4.571257873	0.627575747	-7.28399384	3.24E-13	1.42E-10
TPSB2	942.7765966	-4.614007121	0.635409082	-7.261474928	3.83E-13	1.64E-10
ABI3BP	1419.052586	-3.412946115	0.471010792	-7.246004075	4.29E-13	1.80E-10
SCARA3	2310.383603	-3.042439406	0.421035801	-7.226082428	4.97E-13	2.03E-10
MASP1	3627.102391	-4.646755101	0.645017016	-7.204081418	5.84E-13	2.34E-10
NRXN1	75.63274188	-6.157140737	0.856264469	-7.190699789	6.45E-13	2.52E-10
ZBTB16	482.5435327	-4.2002114	0.586425649	-7.16239375	7.93E-13	3.03E-10
PGF	475.6525324	-2.994089938	0.418710885	-7.150733475	8.63E-13	3.23E-10
ASPA	72.72929589	-6.128503922	0.857649265	-7.145699501	8.95E-13	3.28E-10
EN2	889.9256723	4.488214432	0.628508439	7.141056757	9.26E-13	3.32E-10
PDE2A	422.8906253	-3.540627291	0.497754876	-7.113194583	1.13E-12	3.99E-10
DLX6	1055.13998	2.950448112	0.415155647	7.106848084	1.19E-12	4.09E-10
COL4A6	711.1830426	-4.408780949	0.625914415	-7.043744067	1.87E-12	6.33E-10
LMO3	326.2207775	-4.632620191	0.661090152	-7.007546813	2.43E-12	8.05E-10
COLEC12	1635.095917	-4.136826437	0.59065972	-7.003738861	2.49E-12	8.11E-10
PTGER3	719.4651705	-5.071859028	0.724783962	-6.997752838	2.60E-12	8.31E-10
NGFR	310.9623446	-4.476165422	0.642906653	-6.962387775	3.35E-12	1.05E-09
DLX5	2899.495871	2.789506078	0.406942136	6.854797849	7.14E-12	2.20E-09
GNG7	268.1336016	-3.18544634	0.465935204	-6.836672379	8.11E-12	2.42E-09
LSAMP	799.176839	-3.848831461	0.562806977	-6.838634944	8.00E-12	2.42E-09
SERPINB4	925.7074877	-5.627393747	0.825066967	-6.820529695	9.07E-12	2.66E-09
RERG	1225.377112	-3.52062457	0.51658092	-6.815243136	9.41E-12	2.71E-09
EPHA3	477.2836012	-4.827747423	0.708780361	-6.811344792	9.67E-12	2.74E-09
GLI1	488.1230225	-2.784336774	0.409774458	-6.794803132	1.08E-11	2.98E-09
HSD17B6	371.4679055	-4.795996466	0.705743673	-6.795663428	1.08E-11	2.98E-09
VIPR2	335.9672141	-3.945656894	0.583073551	-6.766996868	1.31E-11	3.56E-09
HPGD	200.7909172	-4.458484953	0.660698394	-6.748139535	1.50E-11	3.99E-09
CPEB1	148.4659171	-4.366399674	0.65142246	-6.702869401	2.04E-11	5.36E-09
IRS2	2804.09901	-2.425877658	0.362666804	-6.688998358	2.25E-11	5.81E-09
CCL21	1948.719021	-2.942700581	0.441673275	-6.662618605	2.69E-11	6.85E-09
CD300LG	73.54167871	-4.909438827	0.742345969	-6.61341077	3.76E-11	9.38E-09
PLAC9	242.8561409	-3.302524401	0.499464043	-6.612136447	3.79E-11	9.38E-09
TGFB3	1835.26768	-2.954562009	0.447496963	-6.60241801	4.05E-11	9.88E-09
OLFM1	404.7398529	-2.879843821	0.437119346	-6.588232361	4.45E-11	1.07E-08
DES	11792.33736	-5.51616698	0.838152535	-6.58134021	4.66E-11	1.08E-08
HLF	504.5564418	-3.83215155	0.582219496	-6.581970507	4.64E-11	1.08E-08
TMEM119	1420.155954	-3.108936617	0.472363983	-6.581654676	4.65E-11	1.08E-08
CTSG	104.0734185	-5.238106858	0.801651786	-6.534142313	6.40E-11	1.44E-08
TSPAN7	660.5150434	-2.883972639	0.441318561	-6.534899941	6.37E-11	1.44E-08
ADCY2	322.2319295	-3.584436248	0.551031292	-6.504959518	7.77E-11	1.73E-08
UST	376.4787536	-2.881284995	0.443574439	-6.495606475	8.27E-11	1.82E-08
GSTM2	464.5406088	-2.886379614	0.446636418	-6.462481555	1.03E-10	2.24E-08
PMP22	3261.69115	-2.766696384	0.429485685	-6.441882649	1.18E-10	2.53E-08
PAMR1	4692.628768	-2.509396976	0.390142771	-6.4319966	1.26E-10	2.67E-08
MIR99AHG	500.6800047	-2.514774159	0.39587374	-6.352465201	2.12E-10	4.44E-08
PID1	1024.71453	-3.065783733	0.484415302	-6.328833382	2.47E-10	5.11E-08
SLC22A3	322.8454183	-4.065833272	0.643342762	-6.319855463	2.62E-10	5.35E-08
KLF2	1668.771513	-2.764797381	0.44281701	-6.243656676	4.27E-10	8.64E-08
CNRIP1	694.5169046	-2.701901589	0.433493326	-6.232856253	4.58E-10	8.86E-08
MUM1L1	1805.728763	-3.022042309	0.484752347	-6.234198411	4.54E-10	8.86E-08
PTGIS	1407.842186	-4.722796137	0.757208047	-6.237118258	4.46E-10	8.86E-08
TPSAB1	1251.505563	-4.355805421	0.698868471	-6.232654068	4.59E-10	8.86E-08
C1orf21	2151.041224	-2.344519961	0.377252193	-6.214728518	5.14E-10	9.83E-08
PLAG1	334.2384979	-3.562419988	0.575253489	-6.19278293	5.91E-10	1.12E-07
IGSF9	810.5225825	2.825336525	0.457865113	6.17067438	6.80E-10	1.27E-07
CDH19	51.96259042	-5.480314192	0.889063596	-6.16414193	7.09E-10	1.31E-07
FGF7	1039.848566	-4.091898725	0.670787323	-6.100143197	1.06E-09	1.94E-07
CD34	2790.43759	-2.149001649	0.353274981	-6.083084752	1.18E-09	2.14E-07
ADAM33	1699.00904	-3.479835355	0.572913205	-6.073931141	1.25E-09	2.24E-07
FOLR2	404.562075	-2.541984079	0.41870873	-6.071008078	1.27E-09	2.26E-07
GSTM5	523.3743474	-3.387442174	0.558121929	-6.069358683	1.28E-09	2.26E-07
CHRDL1	1972.65446	-5.120522446	0.845458205	-6.056505712	1.39E-09	2.42E-07
SCN9A	93.02391333	-3.675390894	0.607323885	-6.051780581	1.43E-09	2.47E-07
LINC01279	1984.626008	-3.808608502	0.633514547	-6.01187221	1.83E-09	3.13E-07
MS4A2	321.5717372	-4.314982202	0.720047307	-5.992637098	2.06E-09	3.49E-07
SMPDL3B	1035.420206	2.530901692	0.423519285	5.975882992	2.29E-09	3.83E-07
CCDC80	10416.56388	-3.571325168	0.601486474	-5.937498723	2.89E-09	4.80E-07
GAS6	2747.817032	-2.998640979	0.506273044	-5.922971827	3.16E-09	5.20E-07
HOTTIP	159.5593688	-5.235668972	0.886242014	-5.907719209	3.47E-09	5.65E-07
CCDC146	2784.119883	2.098761398	0.355963926	5.895994642	3.72E-09	5.87E-07
F12	164.2754541	2.903508146	0.492512316	5.895300593	3.74E-09	5.87E-07
GATA6	162.6023783	-2.874158085	0.487209036	-5.899229838	3.65E-09	5.87E-07
PHYHIP	156.4660761	-3.070903177	0.52076352	-5.896924534	3.70E-09	5.87E-07
TUB	1049.161948	-2.42351583	0.411690521	-5.886741881	3.94E-09	6.13E-07
CDKN2A	230.2093281	2.877771634	0.48946862	5.879379217	4.12E-09	6.35E-07
LEPR	1193.438635	-2.459710904	0.418980269	-5.870708201	4.34E-09	6.63E-07
SFRP1	9409.129962	-3.809740851	0.649193698	-5.868419337	4.40E-09	6.67E-07
DLX6-AS1	241.5464183	3.834196294	0.654683235	5.856567102	4.73E-09	7.10E-07
SYNGR1	1001.281291	-2.506798826	0.430086415	-5.828593372	5.59E-09	8.33E-07
VSTM4	1362.538266	-2.48830023	0.427499109	-5.820597471	5.86E-09	8.66E-07
HMCN2	516.3829876	-3.880319434	0.668207953	-5.807053654	6.36E-09	9.32E-07
HSPB7	744.6229843	-3.92776207	0.676976395	-5.801918794	6.56E-09	9.53E-07
ABCA9	559.5600317	-2.827588229	0.487959019	-5.794724802	6.84E-09	9.81E-07
VSTM2L	334.910565	-4.224390866	0.72905709	-5.79432108	6.86E-09	9.81E-07
ACACB	890.3942432	-2.395639776	0.41425482	-5.783010026	7.34E-09	1.04E-06
OMD	200.2412463	-4.772002154	0.826107268	-5.776492159	7.63E-09	1.07E-06
PSAT1	3513.516995	3.612212312	0.625647945	5.773554183	7.76E-09	1.08E-06
LINC01224	58.77721943	4.646851425	0.805116948	5.771647752	7.85E-09	1.09E-06
ZEB2	2903.654965	-2.343153396	0.406693817	-5.761467961	8.34E-09	1.15E-06
ITM2A	559.9349691	-3.217765886	0.558913771	-5.757177673	8.55E-09	1.17E-06
PDLIM3	1730.256432	-4.134862788	0.718928703	-5.7514226	8.85E-09	1.20E-06
MSC-AS1	213.1123476	-4.096612114	0.71336314	-5.74267422	9.32E-09	1.25E-06
TNS2	2823.600033	-2.058574493	0.358865157	-5.736345407	9.67E-09	1.29E-06
SNED1	2301.129906	-2.75644422	0.480709974	-5.734110735	9.80E-09	1.30E-06
PAPPA	811.8754327	-3.404685911	0.594208281	-5.72978536	1.01E-08	1.32E-06
ALDH3B2	2264.169802	2.094160156	0.365794571	5.724962373	1.03E-08	1.33E-06
LHFPL3	118.8595826	-3.732628663	0.652064204	-5.724326902	1.04E-08	1.33E-06
RSPO1	395.060158	-3.826290911	0.668257266	-5.725775241	1.03E-08	1.33E-06
MATN2	6596.636096	-3.327468676	0.581843751	-5.718835459	1.07E-08	1.37E-06
DPT	496.0747181	-4.159009156	0.727491726	-5.716916091	1.08E-08	1.37E-06
CLU	20984.62471	-3.647562735	0.638713698	-5.710794601	1.12E-08	1.40E-06
ZNF486	671.6504654	-3.222533802	0.564213364	-5.711551702	1.12E-08	1.40E-06
SCARA5	182.0839721	-4.918675668	0.862598833	-5.702158966	1.18E-08	1.46E-06
RGN	215.7401385	-2.749776636	0.482872782	-5.694619238	1.24E-08	1.52E-06
GNAL	376.6584685	-2.745042249	0.482922755	-5.684226352	1.31E-08	1.60E-06
PI16	208.2287399	-4.3731208	0.771940965	-5.665097459	1.47E-08	1.78E-06
ADAMTSL1	461.4437412	-2.680669365	0.473397473	-5.662618668	1.49E-08	1.80E-06
DGKB	70.20692954	-5.111425715	0.903609747	-5.656673947	1.54E-08	1.85E-06
FAM65B	1563.202541	-3.009594729	0.532325546	-5.653673306	1.57E-08	1.87E-06
ECE2	303.271341	2.385499227	0.423149398	5.63748699	1.73E-08	2.04E-06
GIMAP6	643.9912748	-2.23157252	0.396433674	-5.629119487	1.81E-08	2.12E-06
MAGI2-AS3	943.0890543	-2.860430562	0.508736177	-5.622620705	1.88E-08	2.19E-06
CXorf36	1089.587772	-2.082546986	0.370516738	-5.620655615	1.90E-08	2.20E-06
RAMP2-AS1	196.6121279	-2.884501339	0.514832043	-5.602800719	2.11E-08	2.42E-06
MFAP4	3895.861076	-3.868122256	0.690680499	-5.600450949	2.14E-08	2.43E-06
TSPYL2	2177.037586	-2.125701032	0.37949623	-5.601375886	2.13E-08	2.43E-06
CDC42EP5	566.6406536	-2.234902015	0.399171309	-5.598854337	2.16E-08	2.43E-06
SPARCL1	28879.36716	-3.256599032	0.581842955	-5.59704127	2.18E-08	2.43E-06
ZNF676	42.86223602	-4.829260229	0.862900479	-5.596543689	2.19E-08	2.43E-06
NLRP1	582.1893174	-2.155026315	0.385471984	-5.59061723	2.26E-08	2.50E-06
HSPB6	3615.837968	-3.755224205	0.676374169	-5.551992342	2.82E-08	3.10E-06
FREM2	1409.940514	2.595724076	0.468814593	5.536781736	3.08E-08	3.36E-06
SRMS	47.60968133	4.211337505	0.760724019	5.535959692	3.10E-08	3.36E-06
DACT1	626.0842525	-2.368106677	0.427933315	-5.533821732	3.13E-08	3.36E-06
ZNF208	291.1461821	-2.808253687	0.507497602	-5.53353095	3.14E-08	3.36E-06
TSPYL5	689.336272	-2.639094681	0.47717066	-5.530714487	3.19E-08	3.40E-06
MDGA1	324.5993992	-2.81584743	0.50998635	-5.521417253	3.36E-08	3.56E-06
HPN	270.6555296	3.042441146	0.552205023	5.509622364	3.60E-08	3.79E-06
SSPN	1882.110881	-2.842834544	0.516436819	-5.504709268	3.70E-08	3.87E-06
E2F7	400.4969635	3.119828117	0.567710826	5.495452919	3.90E-08	4.05E-06
PRRT2	371.4308157	-2.399002605	0.43672106	-5.493214837	3.95E-08	4.08E-06
HAAO	240.6361322	-2.664706122	0.485191745	-5.492068129	3.97E-08	4.08E-06
CPED1	1841.0427	-2.834939614	0.516377032	-5.490057535	4.02E-08	4.11E-06
PEG3	699.198976	-2.888279956	0.527324523	-5.477234288	4.32E-08	4.39E-06
CRISPLD2	5264.410687	-2.895198318	0.530503289	-5.457455927	4.83E-08	4.88E-06
SOBP	513.802981	-2.333536481	0.428108323	-5.450808482	5.01E-08	5.04E-06
TMEM100	178.3612245	-2.7280233	0.500870753	-5.446561379	5.14E-08	5.13E-06
SELM	2540.635036	-2.486616699	0.457983965	-5.429484191	5.65E-08	5.61E-06
ZDBF2	430.7743134	-3.495739325	0.644904916	-5.420549969	5.94E-08	5.87E-06
ASB2	223.6220335	-2.933089082	0.541634915	-5.415251122	6.12E-08	6.01E-06
PDE4A	826.5023307	-2.02719351	0.374488567	-5.413232035	6.19E-08	6.05E-06
ADAMTSL5	254.4376634	-3.412369654	0.630517516	-5.412014047	6.23E-08	6.05E-06
CCBE1	1093.624798	-4.276294297	0.790816721	-5.407440416	6.39E-08	6.17E-06
EYA4	50.49875267	-4.730025624	0.87484207	-5.406719437	6.42E-08	6.17E-06
EMCN	1065.804921	-2.903508882	0.537448556	-5.402394052	6.58E-08	6.28E-06
NME1	1843.54314	1.998308055	0.371179583	5.383669103	7.30E-08	6.94E-06
SERPINF1	10408.52233	-2.217704463	0.412050149	-5.382122711	7.36E-08	6.96E-06
NPTXR	813.5441481	-2.398162456	0.445678524	-5.380924421	7.41E-08	6.97E-06
JAM2	1016.840492	-2.756163355	0.512766223	-5.375087581	7.65E-08	7.16E-06
MAMDC2	1927.299732	-3.435494923	0.641434918	-5.35595245	8.51E-08	7.92E-06
LOC101928731	183.7754046	-3.78558711	0.707246705	-5.352569453	8.67E-08	8.02E-06
SBK1	640.5392986	2.093343252	0.392456997	5.333942999	9.61E-08	8.85E-06
NEK2	250.1389036	3.644488586	0.686909819	5.305628896	1.12E-07	1.03E-05
IRF4	365.2075887	-3.349599462	0.631676736	-5.302711449	1.14E-07	1.04E-05
MIR503HG	202.1585062	-3.421810661	0.646075734	-5.296299618	1.18E-07	1.07E-05
LIPG	579.2195079	2.671601446	0.505022808	5.290060976	1.22E-07	1.10E-05
LINC01140	222.0189698	-2.446461183	0.464155996	-5.270773633	1.36E-07	1.22E-05
AJAP1	87.09389899	-3.039058012	0.57681138	-5.268720623	1.37E-07	1.23E-05
CPM	5128.832643	2.370178228	0.45050357	5.26117524	1.43E-07	1.27E-05
SP9	57.43582255	4.59362179	0.874408695	5.253403606	1.49E-07	1.32E-05
PCDH20	224.8957856	-3.106486033	0.591994381	-5.247492434	1.54E-07	1.36E-05
SEPP1	4391.893788	-1.973786998	0.376865094	-5.237383431	1.63E-07	1.42E-05
TMEM132C	680.3236685	-3.408685857	0.651403553	-5.232832766	1.67E-07	1.45E-05
LOC100507351	121.7860095	-2.702828635	0.516988144	-5.228028278	1.71E-07	1.48E-05
RIMS1	55.4215252	-4.586672234	0.877186981	-5.22884212	1.71E-07	1.48E-05
PNPLA7	347.2379061	-2.38758579	0.457749708	-5.215919851	1.83E-07	1.57E-05
AGAP11	200.4138109	-2.60888361	0.500991901	-5.207436691	1.91E-07	1.63E-05
PODXL2	964.47405	2.337027721	0.448912446	5.205976673	1.93E-07	1.64E-05
KRT80	861.5769486	2.383149264	0.457864361	5.204924137	1.94E-07	1.64E-05
DKK2	160.3910024	-2.943704233	0.565897278	-5.201834939	1.97E-07	1.66E-05
APOL3	1036.813578	-2.405454838	0.462506618	-5.200909009	1.98E-07	1.66E-05
FAM110D	158.3268435	-2.53175444	0.487342679	-5.19501892	2.05E-07	1.71E-05
AHRR	161.6135598	-2.593558338	0.499501612	-5.192292226	2.08E-07	1.72E-05
SGCE	1231.470534	-2.928962573	0.565027265	-5.183754408	2.17E-07	1.80E-05
SLC2A4	116.7224564	-2.75757823	0.532800665	-5.175628352	2.27E-07	1.87E-05
LYVE1	409.0101847	-3.423618101	0.663263432	-5.161777261	2.45E-07	2.00E-05
PLP1	113.2488354	-4.48091502	0.868613868	-5.158696155	2.49E-07	2.02E-05
RNASE4	1439.540903	-2.378587329	0.461398925	-5.155164435	2.53E-07	2.05E-05
MMP28	137.5816218	-2.790404274	0.542346385	-5.145059225	2.67E-07	2.16E-05
RERGL	329.0305423	-3.729359494	0.726998934	-5.129800499	2.90E-07	2.32E-05
SAMD3	145.208594	-2.652856386	0.517109096	-5.130167711	2.89E-07	2.32E-05
LOC101928882	33.18033446	-4.591919957	0.896412933	-5.122549875	3.01E-07	2.40E-05
TNXB	3191.568925	-3.535168032	0.690394164	-5.120506833	3.05E-07	2.41E-05
PDE7B	429.4084169	-2.149777819	0.420718564	-5.109776467	3.23E-07	2.54E-05
FLT3LG	214.3000573	-2.295349664	0.449807243	-5.102962878	3.34E-07	2.62E-05
GIMAP8	476.5401738	-2.059038954	0.403648875	-5.101064516	3.38E-07	2.63E-05
ZNF334	155.0033379	-3.304050434	0.647658639	-5.101530705	3.37E-07	2.63E-05
CPQ	1189.733039	-2.188387644	0.429367247	-5.096773591	3.45E-07	2.68E-05
ADHFE1	172.8530729	-3.307989685	0.649454239	-5.09349156	3.52E-07	2.71E-05
OCIAD2	4367.788978	2.091227854	0.411010277	5.088018401	3.62E-07	2.77E-05
PRR7	373.3847403	2.451859581	0.481935808	5.087523154	3.63E-07	2.77E-05
CCL13	46.21944401	-4.275826285	0.841086585	-5.083693358	3.70E-07	2.82E-05
CTSK	10097.6869	-2.954596998	0.581752943	-5.078783075	3.80E-07	2.85E-05
ITGA7	498.3041929	-2.052852596	0.404135844	-5.079610299	3.78E-07	2.85E-05
STXBP5L	48.41373488	-4.414606692	0.869293855	-5.07838249	3.81E-07	2.85E-05
TWIST2	850.2740847	-2.727111963	0.53703271	-5.078111471	3.81E-07	2.85E-05
PTPRN2	361.1481611	-2.222604028	0.437864691	-5.076006519	3.85E-07	2.87E-05
PLSCR4	917.6824204	-2.160055357	0.426387244	-5.065947411	4.06E-07	3.00E-05
TCEAL2	199.2953999	-4.220553676	0.833007269	-5.066646875	4.05E-07	3.00E-05
PLA2R1	1087.0623	-2.238661372	0.442407086	-5.060184259	4.19E-07	3.08E-05
SLC24A2	164.4157223	-4.098902174	0.810339913	-5.05825038	4.23E-07	3.10E-05
ECM2	1120.710092	-2.867131676	0.568044705	-5.047369779	4.48E-07	3.27E-05
LINC00890	2753.422302	-4.27271244	0.847374362	-5.042296096	4.60E-07	3.34E-05
DBNDD1	853.3744989	3.013607718	0.598665897	5.033872374	4.81E-07	3.47E-05
PAPPA2	53.04838392	-4.503107332	0.894636056	-5.033451651	4.82E-07	3.47E-05
EDNRA	2806.60358	-2.77281385	0.551135936	-5.031088823	4.88E-07	3.50E-05
LRRK2	559.3569015	-2.847870436	0.566279259	-5.029091907	4.93E-07	3.52E-05
HIGD1B	68.01363757	-3.266108973	0.649931301	-5.025314166	5.03E-07	3.58E-05
MYOM1	143.1887948	-2.70188249	0.537836206	-5.023615853	5.07E-07	3.59E-05
HDC	130.5509875	-4.153092642	0.827406646	-5.019409336	5.18E-07	3.66E-05
CASC9	102.2439465	3.007086342	0.599552625	5.015550289	5.29E-07	3.70E-05
DIO3OS	46.65663779	-3.656506197	0.729033328	-5.015554236	5.29E-07	3.70E-05
C19orf45	102.8232172	2.924659951	0.583425083	5.012914313	5.36E-07	3.73E-05
POTEF	79.14376603	3.263643472	0.651086451	5.012611564	5.37E-07	3.73E-05
STAB2	73.46341971	-3.282814827	0.655872601	-5.005262943	5.58E-07	3.86E-05
FAM49A	558.5441132	-2.552364834	0.510255765	-5.002128364	5.67E-07	3.88E-05
PLK4	379.3288549	2.128970036	0.425589182	5.002406377	5.66E-07	3.88E-05
SLC19A1	432.2613677	2.050613827	0.409869393	5.003090888	5.64E-07	3.88E-05
CCDC141	158.0244433	-4.464437037	0.893036775	-4.99916371	5.76E-07	3.92E-05
SCN7A	303.847576	-3.905530518	0.782456624	-4.991369999	6.00E-07	4.07E-05
TRANK1	1729.072619	-1.754074881	0.353023273	-4.968723074	6.74E-07	4.56E-05
PEAR1	688.19333	-2.187625568	0.440837464	-4.96243116	6.96E-07	4.69E-05
YPEL4	127.769344	-2.880465016	0.580779784	-4.959650961	7.06E-07	4.74E-05
GPRC5B	761.4535242	-1.859931687	0.375748567	-4.949936878	7.42E-07	4.96E-05
BST1	290.7905513	-2.115750168	0.42794361	-4.943992901	7.65E-07	5.10E-05
ARHGEF6	1153.909748	-2.106600093	0.426524159	-4.938993608	7.85E-07	5.21E-05
TIMP3	14210.85412	-2.800516697	0.567648983	-4.933536011	8.08E-07	5.34E-05
CSDC2	686.1396104	-3.047629423	0.618620112	-4.926495862	8.37E-07	5.49E-05
NAP1L2	84.72881269	-3.819225556	0.775133671	-4.927183138	8.34E-07	5.49E-05
GIMAP1	203.1864362	-2.310921707	0.470085006	-4.915965572	8.83E-07	5.77E-05
EDAR	228.6784563	2.397264326	0.488162051	4.910796159	9.07E-07	5.90E-05
KLHL4	59.47985658	-3.698461067	0.75329345	-4.909721525	9.12E-07	5.90E-05
RADIL	99.04220218	-2.825978189	0.575584177	-4.909756557	9.12E-07	5.90E-05
CD40	310.96777	-2.681506743	0.546869371	-4.90337709	9.42E-07	6.07E-05
GIMAP7	299.695382	-2.359849001	0.481404051	-4.902013175	9.49E-07	6.09E-05
F2RL1	1186.11826	2.208185593	0.45121269	4.893890711	9.89E-07	6.32E-05
LINC00865	143.1714265	-2.642020533	0.539948155	-4.893100399	9.93E-07	6.32E-05
CHST7	439.0883369	-2.258355254	0.463487739	-4.872524259	1.10E-06	6.98E-05
HOMER2	4946.139658	2.452118569	0.503275718	4.872316464	1.10E-06	6.98E-05
PRKAR2B	639.890218	-2.768301861	0.568408541	-4.870267886	1.11E-06	7.02E-05
NLGN1	107.0601019	-3.647181342	0.749155032	-4.868393306	1.13E-06	7.06E-05
SYNM	654.8977017	-2.836076967	0.583496098	-4.860490034	1.17E-06	7.33E-05
MCOLN3	191.4581431	-2.236033091	0.460324896	-4.857510659	1.19E-06	7.41E-05
GFRA2	183.5933382	-2.900277549	0.597410268	-4.854750082	1.21E-06	7.47E-05
WDR17	72.28981722	-3.588742291	0.739247656	-4.854587309	1.21E-06	7.47E-05
CPA3	1289.484822	-3.889529871	0.801927221	-4.85022801	1.23E-06	7.58E-05
GABRB3	169.1064769	-2.952611709	0.608751772	-4.850272059	1.23E-06	7.58E-05
A2ML1	476.0367869	2.954556385	0.609265927	4.849370778	1.24E-06	7.59E-05
DACT2	490.532908	2.494241504	0.515026893	4.842934492	1.28E-06	7.81E-05
TEF	652.9467198	-2.066853665	0.427057278	-4.839757506	1.30E-06	7.91E-05
C10orf54	1051.933372	-1.901210772	0.392989278	-4.837818427	1.31E-06	7.95E-05
CCL19	204.4255786	-4.285418275	0.885912169	-4.837294739	1.32E-06	7.95E-05
CGNL1	2322.577032	-2.320327067	0.479976752	-4.834248857	1.34E-06	8.05E-05
ACTG2	9660.313681	-4.018703201	0.831662989	-4.832129424	1.35E-06	8.11E-05
KIAA1804	489.6898996	2.213353256	0.458216969	4.830360733	1.36E-06	8.15E-05
TSC22D3	2667.219586	-1.794375946	0.371916144	-4.824678826	1.40E-06	8.36E-05
HSD17B14	355.7037466	-2.104068377	0.436469329	-4.820655748	1.43E-06	8.50E-05
LGI2	272.7289093	-2.705120294	0.561992677	-4.813444027	1.48E-06	8.78E-05
MAPK10	903.6788409	-1.862766856	0.387250593	-4.810236289	1.51E-06	8.89E-05
LOC101927468	62.45044149	-3.184567446	0.662637585	-4.805896191	1.54E-06	9.04E-05
SHC3	385.8399762	-2.746404403	0.571495195	-4.80564741	1.54E-06	9.04E-05
SLC9A2	567.8819468	2.155117332	0.448946901	4.800383578	1.58E-06	9.22E-05
TRPC1	367.2264616	-2.60687293	0.543045345	-4.800470081	1.58E-06	9.22E-05
DPYD	698.2658666	-2.758735779	0.574876812	-4.798829452	1.60E-06	9.26E-05
PRIMA1	250.7130502	-2.380654865	0.496266182	-4.797132969	1.61E-06	9.31E-05
EPPK1	810.1987854	2.074871958	0.432632423	4.79592339	1.62E-06	9.33E-05
CD8B	406.6008457	-3.171295658	0.66319753	-4.781826706	1.74E-06	9.95E-05
PRRX1	4009.096377	-2.99485566	0.62627206	-4.782036196	1.74E-06	9.95E-05
ERG	857.4874677	-2.005851899	0.420703981	-4.76784625	1.86E-06	0.000106294
SDPR	746.8345225	-2.642535226	0.55511819	-4.760310999	1.93E-06	0.000109984
KIF24	489.441743	2.305202026	0.48524095	4.750633731	2.03E-06	0.000115009
HOXC4	272.7913165	2.293690934	0.4833346	4.745555011	2.08E-06	0.000117554
CCDC3	1645.564789	-1.760947232	0.37119963	-4.743935844	2.10E-06	0.000118118
RGS17	50.13722444	-3.697527521	0.779663809	-4.74246397	2.11E-06	0.0001186
EGFL7	630.5002166	-2.002795841	0.422555506	-4.7397225	2.14E-06	0.00011975
WNT4	331.0039544	-2.875041443	0.606649024	-4.739217126	2.15E-06	0.00011975
MYCT1	432.8179835	-2.294541907	0.484457324	-4.736313791	2.18E-06	0.000121094
ITGA9	1051.957113	-2.767098222	0.585181839	-4.72861261	2.26E-06	0.000124987
PON3	37.1748932	-4.163425588	0.880412772	-4.728947285	2.26E-06	0.000124987
NFATC1	480.556127	-2.262001882	0.478738299	-4.724923589	2.30E-06	0.000126878
FAM83H-AS1	745.5354122	2.204292213	0.466970678	4.720408192	2.35E-06	0.000129011
PPP1R14C	327.1579129	2.255092279	0.477747107	4.720263599	2.36E-06	0.000129011
TFAP2B	59.01477219	3.547770225	0.751912587	4.718328013	2.38E-06	0.00012984
SRL	91.7140232	-3.583410892	0.759825445	-4.716097516	2.40E-06	0.000130864
ARHGAP6	449.9258743	-2.895835957	0.6142987	-4.714051903	2.43E-06	0.0001311
TUBA1C	4940.266102	1.745204725	0.370229272	4.713848571	2.43E-06	0.0001311
ZNF727	42.75908475	-3.617833006	0.767417089	-4.714298203	2.43E-06	0.0001311
PRAME	2233.855997	3.539323977	0.752151611	4.705599147	2.53E-06	0.000136097
SLC2A13	560.9173813	-2.469267565	0.52485471	-4.70466877	2.54E-06	0.000136303
CFD	1817.707839	-3.154654179	0.671030196	-4.701210463	2.59E-06	0.00013821
DCN	37280.17788	-2.615079787	0.556436058	-4.699695047	2.61E-06	0.000138818
LRCH2	348.4030354	-2.656064561	0.565653036	-4.695572003	2.66E-06	0.00014122
FAM227A	525.4651733	1.981141716	0.422089153	4.693657014	2.68E-06	0.000141326
LRRC4B	624.4355679	-2.756092902	0.58720556	-4.693574263	2.68E-06	0.000141326
ST8SIA1	157.1448539	-3.170592545	0.675344332	-4.694779232	2.67E-06	0.000141326
C1S	12019.2359	-2.482661845	0.529276098	-4.690674402	2.72E-06	0.000142916
NDN	2197.648775	-2.592958277	0.552929128	-4.689494812	2.74E-06	0.000143314
FOXP2	146.1526792	-3.710238121	0.791620489	-4.686889957	2.77E-06	0.000143871
NHSL1	1572.108009	2.488699606	0.531116617	4.685787499	2.79E-06	0.000143871
PPP1R16B	368.9028681	-1.90880651	0.40716081	-4.688089969	2.76E-06	0.000143871
REC8	2179.589816	2.659507798	0.567582424	4.685676804	2.79E-06	0.000143871
REM1	251.1015183	-2.910874974	0.621082347	-4.68677783	2.78E-06	0.000143871
CAMK2A	91.4686336	-3.615528343	0.771959717	-4.683571259	2.82E-06	0.000144933
EBF1	739.7173499	-2.364803602	0.505533566	-4.677836963	2.90E-06	0.00014861
CAV2	1692.677686	-1.928195816	0.412680331	-4.672371492	2.98E-06	0.000152177
GADD45G	320.6677378	-2.479078345	0.531423878	-4.664973573	3.09E-06	0.000157299
MEG3	1488.304931	-2.828476825	0.606634369	-4.662572663	3.12E-06	0.000157634
PCSK2	30.76217939	-4.379547741	0.939250594	-4.662810722	3.12E-06	0.000157634
RPRM	142.3088316	-2.974632905	0.638006057	-4.662389759	3.13E-06	0.000157634
SHOX2	185.7611818	-4.063065148	0.871497679	-4.662164048	3.13E-06	0.000157634
ZNF300P1	113.3959521	-2.984415657	0.641270302	-4.65391216	3.26E-06	0.000163611
ZNF366	277.7635309	-2.234807202	0.480453012	-4.651458402	3.30E-06	0.000165098
MYH11	34923.06768	-3.624322702	0.780154784	-4.645645681	3.39E-06	0.000169334
JSRP1	65.69256448	2.872979816	0.619718534	4.635943028	3.55E-06	0.000176972
MAD2L1	323.530038	2.171729087	0.468609917	4.634407021	3.58E-06	0.000177287
SLC26A7	542.049631	2.288296596	0.49375406	4.63448664	3.58E-06	0.000177287
SERTM1	163.3981915	-3.603612973	0.777733033	-4.633483239	3.60E-06	0.00017758
P2RX7	221.1094796	-2.421465435	0.522867071	-4.631130104	3.64E-06	0.000179108
NAALAD2	244.1524241	-3.101246476	0.670121398	-4.627887552	3.69E-06	0.000181426
CCND2	2346.898278	-2.673914623	0.578299291	-4.623755664	3.77E-06	0.000184564
NR4A3	2944.934467	-3.093478463	0.669993125	-4.617179412	3.89E-06	0.000189979
ASPN	1587.462918	-2.983740732	0.647221316	-4.610077972	4.03E-06	0.000196041
SYNE1	3085.131331	-2.3479326	0.509483451	-4.608457045	4.06E-06	0.000197029
IL13	40.98406845	-4.322359385	0.938492781	-4.60563946	4.11E-06	0.000199166
CNN1	10239.1915	-3.717309356	0.807620207	-4.602793893	4.17E-06	0.000201353
ASF1B	551.6115871	2.686251074	0.583857085	4.600870902	4.21E-06	0.000202664
HIC1	1351.202514	-2.449502207	0.532936235	-4.596238807	4.30E-06	0.000206654
ZNF536	62.59751289	-3.740344758	0.814491748	-4.592243897	4.39E-06	0.000210076
GUCY1A2	1622.859853	-2.456753113	0.535179337	-4.59052311	4.42E-06	0.00021124
THBS2	4551.782105	-2.691311914	0.587001764	-4.584844677	4.54E-06	0.000216475
CR2	76.30689218	2.746000358	0.599268492	4.582253858	4.60E-06	0.000218583
PRR15L	1196.396054	2.132275264	0.465632336	4.579310971	4.67E-06	0.000221083
TFPI	1050.880048	-2.385398528	0.521170997	-4.576997845	4.72E-06	0.000222342
TGM2	22783.90345	-2.178918178	0.476058321	-4.576998406	4.72E-06	0.000222342
AQP1	5225.432808	-2.547355012	0.557328294	-4.570654384	4.86E-06	0.000228227
CYP4F24P	33.36971692	-4.133163414	0.904396326	-4.570079834	4.88E-06	0.000228227
LEFTY2	2360.88229	-3.148290282	0.68892647	-4.569849494	4.88E-06	0.000228227
ANO5	170.2114481	-2.898494078	0.6345103	-4.568080424	4.92E-06	0.000229506
COL16A1	2059.32379	-2.872626243	0.629070008	-4.566465112	4.96E-06	0.000229506
KIAA0513	831.9315517	-2.245409513	0.491639402	-4.567187872	4.94E-06	0.000229506
TTK	300.1152275	2.605221052	0.570512254	4.566459412	4.96E-06	0.000229506
CLDN5	531.7348611	-1.798871926	0.39438738	-4.561180238	5.09E-06	0.000234735
FBLN7	244.907979	-2.116804754	0.46452269	-4.556945867	5.19E-06	0.000238265
MELK	387.3268127	2.680525761	0.588199031	4.557174731	5.18E-06	0.000238265
PLIN4	563.943079	-2.841441438	0.623979207	-4.553743789	5.27E-06	0.000241293
UHRF1	829.942654	2.707153016	0.595465736	4.546278408	5.46E-06	0.000249358
SPOCK3	39.07035839	-4.124089558	0.907472981	-4.544586609	5.50E-06	0.000250717
COL13A1	100.5534207	-2.89455214	0.637120964	-4.543175163	5.54E-06	0.000251102
TTYH2	207.4372973	-2.175702231	0.478869753	-4.543411261	5.54E-06	0.000251102
LOC440910	61.92700931	3.473041575	0.764696821	4.541723572	5.58E-06	0.000252187
EPHB6	710.2346966	-2.452773006	0.540133757	-4.541047423	5.60E-06	0.000252349
ZNF474	158.7726118	2.677438793	0.590139151	4.536961811	5.71E-06	0.000256627
ADCYAP1	49.50349006	-4.153149697	0.916535951	-4.531354924	5.86E-06	0.000262862
TSPAN2	540.0988066	-3.2521344	0.71807302	-4.528974504	5.93E-06	0.000265165
SRD5A2	261.6221422	2.990722496	0.661257048	4.522783543	6.10E-06	0.00027235
SOX18	651.1210897	-2.024415245	0.448013874	-4.518644091	6.22E-06	0.000277025
MGP	15161.74261	-2.732224544	0.605070915	-4.515544339	6.32E-06	0.000280399
CDH16	3608.653695	3.809527919	0.844135921	4.512931893	6.39E-06	0.000282293
NR4A1	16191.50909	-1.933874276	0.428505317	-4.513069502	6.39E-06	0.000282293
SERPINB3	3708.390585	-4.105258103	0.909748871	-4.512517943	6.41E-06	0.000282293
TSHZ3	1707.685298	-2.576705048	0.57113453	-4.511555357	6.44E-06	0.000282868
LOC339803	170.8385085	-2.877487838	0.63800891	-4.510106039	6.48E-06	0.000284097
CDC20	953.8631149	2.770080567	0.614652882	4.506739734	6.58E-06	0.000287207
NCAM2	77.97618531	-2.979451056	0.661065303	-4.507044982	6.57E-06	0.000287207
L1CAM	108.1790289	-2.485086896	0.552299365	-4.499528796	6.81E-06	0.000296388
STIL	495.0335419	1.911615742	0.425051963	4.49736952	6.88E-06	0.000298674
SHC2	695.777624	-2.405204537	0.534892717	-4.496611112	6.90E-06	0.000299003
E2F8	280.9248292	2.265472587	0.503918215	4.495714817	6.93E-06	0.000299527
CENPF	1126.905992	2.362945418	0.525749057	4.494435868	6.98E-06	0.000300595
NAT8L	348.4981759	3.197439903	0.711914471	4.491325899	7.08E-06	0.000304272
JPH3	170.4594156	-3.213217063	0.715954325	-4.48801963	7.19E-06	0.000307528
KRT8	34401.11304	1.773220883	0.395088347	4.488162949	7.18E-06	0.000307528
HPSE2	855.3839829	-3.549964067	0.792438234	-4.479799074	7.47E-06	0.000318837
CADM3	70.7292659	-3.535094323	0.789269529	-4.478944382	7.50E-06	0.000319341
GPT2	1982.011414	2.219242119	0.495577372	4.478094126	7.53E-06	0.000319841
CCL22	94.66439225	-2.795225671	0.62432028	-4.477230297	7.56E-06	0.000320364
THBD	1997.917369	-2.873500382	0.642076126	-4.475326626	7.63E-06	0.000322455
ADAMTS9-AS1	71.28194727	-3.539322209	0.791131132	-4.473749122	7.69E-06	0.000324065
AKT3	2059.341112	-2.565807043	0.57363652	-4.472879521	7.72E-06	0.000324608
ABCD2	72.06824302	-3.187325525	0.713657015	-4.466186779	7.96E-06	0.000333026
COL6A5	39.83151586	-4.220250446	0.944868941	-4.466492929	7.95E-06	0.000333026
PTH1R	321.1894866	-2.311536823	0.517600194	-4.465873179	7.97E-06	0.000333026
ULBP3	55.03401064	2.851663783	0.638683896	4.464906352	8.01E-06	0.00033374
RRAS	1840.365654	-1.907614768	0.427421055	-4.463080951	8.08E-06	0.000335802
ACVRL1	1368.072163	-1.983026689	0.444528723	-4.46096413	8.16E-06	0.000338336
SLC27A2	350.5430939	1.999988069	0.448653859	4.457752965	8.28E-06	0.000342635
TKT	13928.13797	1.922989085	0.431504823	4.456471821	8.33E-06	0.000343879
ABRACL	1021.854734	1.981403798	0.444800316	4.454591706	8.41E-06	0.000346094
MRC1	982.6678818	-2.98490737	0.670273872	-4.453265295	8.46E-06	0.000347426
ARMCX4	451.432205	-2.17478417	0.488499103	-4.451971677	8.51E-06	0.0003479
HIST1H2BH	221.7123071	2.990390439	0.671698391	4.451983921	8.51E-06	0.0003479
HN1	2602.340248	1.700491514	0.382071275	4.450718038	8.56E-06	0.000349126
EIF4EBP1	1258.616483	1.815219987	0.407940371	4.449718925	8.60E-06	0.000349942
JAZF1	2474.636999	-2.182758467	0.490861498	-4.446790947	8.72E-06	0.000353924
ABCA10	223.6201974	-2.31963938	0.522013545	-4.443638299	8.85E-06	0.00035803
COBL	1527.501159	2.135704051	0.480654957	4.443320561	8.86E-06	0.00035803
MSC	249.0023315	-2.871300421	0.6463884	-4.442066756	8.91E-06	0.000359297
ADCY9	1285.544104	-2.040692873	0.46018644	-4.434491534	9.23E-06	0.000370466
CMYA5	530.7917801	-2.216976326	0.499938335	-4.434499554	9.23E-06	0.000370466
RUNX1T1	695.9818999	-2.396911887	0.54187539	-4.423363622	9.72E-06	0.000389191
GLDC	730.2096462	2.880172452	0.651257605	4.422478036	9.76E-06	0.000389762
TSPAN4	1004.698356	-1.743261823	0.394218913	-4.422065422	9.78E-06	0.000389762
ATP1B2	568.0708885	-2.166693629	0.490160522	-4.420375638	9.85E-06	0.000391933
CLIC2	566.3827572	-2.353532228	0.532636122	-4.4186493	9.93E-06	0.000393297
CXCL12	3970.798008	-2.951943759	0.668059407	-4.418684515	9.93E-06	0.000393297
ELFN1-AS1	57.00858789	3.177860688	0.719476912	4.416904334	1.00E-05	0.000395593
C7	1991.889833	-3.137780393	0.710602569	-4.415661484	1.01E-05	0.000396981
UNC93A	64.75946503	3.604766029	0.81747922	4.409611815	1.04E-05	0.000407321
MEF2C	1677.264475	-2.00659775	0.45560491	-4.404249614	1.06E-05	0.000416594
PCSK5	1054.134459	-2.432213945	0.552365552	-4.403268695	1.07E-05	0.000417551
RORA	774.9869167	-2.173458673	0.493695796	-4.402424914	1.07E-05	0.000418247
MMRN1	1354.699034	-2.211865566	0.502617853	-4.400690412	1.08E-05	0.00042067
RBFOX3	138.2959332	-3.800646739	0.864211519	-4.397820041	1.09E-05	0.000425327
RASIP1	374.6820353	-1.906942885	0.43390455	-4.394844176	1.11E-05	0.000430182
TM4SF18	519.8957346	-1.739573897	0.395861844	-4.394396487	1.11E-05	0.000430182
TEC	293.0678894	1.842454886	0.419327401	4.393833744	1.11E-05	0.000430349
PNMT	421.2279898	3.037735997	0.691847919	4.390756864	1.13E-05	0.000434575
TFAP2C	1450.164039	-1.747119992	0.397873584	-4.391143474	1.13E-05	0.000434575
LOC101928841	167.6301619	-2.615498974	0.59599549	-4.388454302	1.14E-05	0.000438241
KLHDC1	166.5112589	-2.320035633	0.529210952	-4.383952423	1.17E-05	0.000446427
MMRN2	1191.417783	-2.135015187	0.487184712	-4.382352593	1.17E-05	0.000448741
ACOX2	273.668879	-2.56148755	0.584954372	-4.378952737	1.19E-05	0.000454772
PDK4	1680.844374	-1.898458971	0.4335868	-4.378498081	1.19E-05	0.000454772
PRRX2	381.0386825	-2.532159378	0.578439396	-4.377570744	1.20E-05	0.000455725
PXDC1	771.2025342	-1.795769206	0.410565514	-4.373891978	1.22E-05	0.000462478
TMEM130	86.63360916	-2.8058286	0.641682045	-4.372615103	1.23E-05	0.000464191
CTSF	2031.419721	-2.253198209	0.515610607	-4.369960933	1.24E-05	0.000468861
FLRT2	1601.495221	-2.546670055	0.582878057	-4.369130083	1.25E-05	0.000469641
RPL22L1	958.6174201	1.594806428	0.365090993	4.368243693	1.25E-05	0.000470543
EPHA5	47.54895947	-3.844866802	0.880569661	-4.366340307	1.26E-05	0.000472909
NBL1	80.13521979	-2.816187628	0.644995062	-4.366215794	1.26E-05	0.000472909
SPEG	983.2335283	-3.309454974	0.758836088	-4.361225071	1.29E-05	0.0004828
CACNA2D1	446.9592771	-2.832534206	0.649594554	-4.360464828	1.30E-05	0.000483455
LMOD1	5439.487906	-3.02885896	0.695055022	-4.357725452	1.31E-05	0.000488509
SLC16A2	757.1424798	-2.223411881	0.510610635	-4.354417492	1.33E-05	0.000494897
GGCT	1670.248453	1.722574553	0.395642679	4.353864343	1.34E-05	0.000495104
CILP	2132.268465	-3.237671831	0.74416786	-4.350727844	1.36E-05	0.000501184
NTS	50.74101375	3.271695718	0.752184813	4.349590233	1.36E-05	0.000502345
TENM1	100.9644925	-3.126343658	0.718815172	-4.349301154	1.37E-05	0.000502345
POC1A	304.1543415	2.387122089	0.548943091	4.348578435	1.37E-05	0.000502951
NT5E	4738.752188	-1.898826914	0.436902874	-4.346107624	1.39E-05	0.000507587
PHF1	1226.759814	-1.924119747	0.442908913	-4.344278673	1.40E-05	0.00051077
DSCAML1	39.74182189	-3.559753858	0.819524162	-4.343683842	1.40E-05	0.000511093
SLC8A1	1010.553462	-2.204032411	0.507572094	-4.342304147	1.41E-05	0.000512189
STEAP4	1814.386519	-2.137418881	0.492187226	-4.342694746	1.41E-05	0.000512189
AOC3	1621.142634	-2.605437503	0.600351102	-4.339856286	1.43E-05	0.00051686
PRKG1	459.4000071	-2.807709061	0.648008079	-4.332830336	1.47E-05	0.000532541
KCNMB2-AS1	59.66161819	3.370979074	0.779027681	4.327162122	1.51E-05	0.000545305
NRXN2	824.3000795	-2.291972497	0.529936522	-4.324994413	1.53E-05	0.000549566
AVPR1A	1399.644995	-1.966217398	0.454770089	-4.323541598	1.54E-05	0.000552068
CH25H	272.6651747	-2.862853743	0.662246896	-4.322940221	1.54E-05	0.000552446
OR7E91P	26.22987055	4.114901886	0.952157667	4.32166019	1.55E-05	0.00055453
TRHDE	123.9990003	-3.307448072	0.765774435	-4.319089172	1.57E-05	0.000559888
CACNA1D	796.9421447	-2.256336664	0.522522998	-4.318157618	1.57E-05	0.000561116
LPAR1	1673.982786	-2.15914944	0.500298768	-4.315720079	1.59E-05	0.000566195
SAPCD2	1267.003496	2.311459986	0.535927622	4.31300775	1.61E-05	0.000570157
SLC9A9	283.805157	-2.365213378	0.548411784	-4.312842007	1.61E-05	0.000570157
SNCG	188.6937945	-2.781880956	0.645014525	-4.312896605	1.61E-05	0.000570157
EFHD1	1972.676132	-2.09372294	0.486023334	-4.307865059	1.65E-05	0.000581964
KIAA0101	496.749673	2.62528154	0.609570729	4.306771001	1.66E-05	0.000583676
ZWINT	590.6686139	2.338928263	0.543659567	4.302192779	1.69E-05	0.00059468
LDLR	3127.557755	-1.549720094	0.360746518	-4.295869859	1.74E-05	0.000610666
PDE4C	150.0650352	-2.475924477	0.576440565	-4.295194734	1.75E-05	0.000611307
SYNDIG1	81.3746254	-3.157436213	0.735751258	-4.291445209	1.78E-05	0.000620487
KRT31	107.835398	3.398614407	0.792400562	4.289010598	1.79E-05	0.000626082
CYS1	356.7205706	-2.801735274	0.653399714	-4.287934647	1.80E-05	0.000627876
PENK	41.38868888	-3.929083807	0.916725883	-4.285996371	1.82E-05	0.000632125
BHMT2	246.199275	-2.417767018	0.564501211	-4.283014759	1.84E-05	0.000639395
NPR2	553.1284533	-1.824243589	0.426994132	-4.272291936	1.93E-05	0.000669618
ENO1	34201.94391	1.643122233	0.384680211	4.271397867	1.94E-05	0.000670988
APOLD1	928.1625619	-2.379679044	0.55734247	-4.269689054	1.96E-05	0.000674824
FAM198A	194.6651881	-2.428183191	0.569029293	-4.26723759	1.98E-05	0.000680944
AGMAT	428.6012271	2.328641236	0.545897105	4.265714572	1.99E-05	0.000684267
PCDHA10	63.41034992	-3.487985376	0.818203276	-4.262981437	2.02E-05	0.000691344
HHEX	163.973972	-2.244355964	0.527049832	-4.258337312	2.06E-05	0.000704488
MYEF2	631.0542338	1.74382028	0.410232364	4.250811082	2.13E-05	0.00072717
EVA1C	864.568028	-1.66215938	0.391104988	-4.249905861	2.14E-05	0.0007287
CLEC3B	479.3415253	-2.574614	0.606278737	-4.246584684	2.17E-05	0.000736726
LOXL4	489.3399303	-2.736794698	0.644437001	-4.246799448	2.17E-05	0.000736726
SORCS1	115.6290991	-2.919801358	0.688030094	-4.243711698	2.20E-05	0.000744788
ARID5A	1304.130901	-2.13525135	0.503209093	-4.243268611	2.20E-05	0.000744826
RAPGEFL1	1638.812902	2.045280864	0.482236685	4.241238642	2.22E-05	0.000750153
SOX15	107.8375863	-2.275785423	0.536642742	-4.240783012	2.23E-05	0.000750237
RAB11FIP1	4616.494884	1.80906039	0.426701032	4.239643817	2.24E-05	0.000752613
BCL6	2160.028721	-1.681256259	0.396668563	-4.238440895	2.25E-05	0.000755212
BNC2	1464.614582	-2.996845208	0.707224076	-4.237476226	2.26E-05	0.000755579
SKA3	273.6161486	2.882952995	0.680289445	4.237832908	2.26E-05	0.000755579
ANO4	443.5256241	-2.746816372	0.648408335	-4.236244699	2.27E-05	0.000758292
KLHL14	943.459242	1.72970784	0.408553737	4.233733983	2.30E-05	0.000763912
USP2-AS1	74.75158577	2.850172169	0.673139847	4.234145669	2.29E-05	0.000763912
RAB3IL1	949.2357077	-1.932261278	0.456802137	-4.229974248	2.34E-05	0.000775327
CD8A	256.3306733	-2.166695337	0.512367668	-4.228790129	2.35E-05	0.00077795
ADAT2	428.9887924	1.686898956	0.399041794	4.227374129	2.36E-05	0.000781389
SPAG5	848.6500264	2.169518533	0.513295846	4.226643464	2.37E-05	0.000782459
PLCH1	967.870298	2.080133257	0.492573316	4.222992174	2.41E-05	0.000793759
MIR4697HG	104.2109675	-2.951549439	0.699272992	-4.220882932	2.43E-05	0.000799726
CCM2L	213.1458263	-1.990807467	0.471778504	-4.219792652	2.45E-05	0.00080061
CDC6	566.0045584	1.94104734	0.459946693	4.220157187	2.44E-05	0.00080061
FBLN2	3967.721608	-2.186922576	0.518671924	-4.216388965	2.48E-05	0.000811273
GFPT2	504.4829464	-2.544100435	0.604226723	-4.210506321	2.55E-05	0.000829607
KRT34	49.76344646	-3.780235236	0.897777173	-4.210660898	2.55E-05	0.000829607
FBLN1	20133.07078	-2.256844124	0.536166207	-4.209224853	2.56E-05	0.000831247
ZFHX4	183.786436	-3.064628041	0.728041056	-4.20941651	2.56E-05	0.000831247
GYLTL1B	1415.31138	2.358422119	0.560429585	4.208239862	2.57E-05	0.00083334
CENPM	320.2482314	2.77177502	0.659818698	4.200813084	2.66E-05	0.000859573
LGI3	26.89375459	-3.84242507	0.916107236	-4.194296167	2.74E-05	0.000883036
SERPING1	14978.05877	-2.309137438	0.550865977	-4.191831654	2.77E-05	0.000891051
IL33	1797.2493	-2.368012492	0.565314348	-4.188842017	2.80E-05	0.000901219
PRR36	425.763736	2.429258766	0.580173936	4.18712151	2.83E-05	0.000904767
TNS1	11505.29261	-2.419071674	0.577687408	-4.187509787	2.82E-05	0.000904767
FAM171B	388.0258551	-2.264256519	0.541010625	-4.185234846	2.85E-05	0.000910656
FHL1	4914.633668	-2.877582244	0.687728351	-4.184184409	2.86E-05	0.000913216
SLC16A7	340.5952703	-2.222320534	0.531358026	-4.182341146	2.89E-05	0.000918986
SRPX	530.2153909	-2.892571816	0.691872888	-4.180785032	2.91E-05	0.000923625
IL34	136.3590691	-2.798148303	0.669393759	-4.180123079	2.91E-05	0.000924646
ALDH1A3	2773.957316	-2.372150054	0.567562278	-4.179541428	2.92E-05	0.000925344
BZW2	2633.470935	1.887781621	0.451827803	4.178099729	2.94E-05	0.000929553
CCNE1	553.9143735	2.6713438	0.639989485	4.174043265	2.99E-05	0.00094457
GRID1	358.948801	-2.817818934	0.675215648	-4.173213315	3.00E-05	0.00094632
C16orf59	120.1495031	2.652055686	0.635817152	4.171098055	3.03E-05	0.000951737
CASC11	35.09045849	3.676014225	0.881234749	4.171435849	3.03E-05	0.000951737
ZNF385B	571.0112933	2.387131048	0.572538317	4.169382167	3.05E-05	0.000957221
ADGRA2	4955.472936	-2.578025218	0.618401979	-4.168850209	3.06E-05	0.00095775
FOXG1	54.91746537	3.956721653	0.949398679	4.167608132	3.08E-05	0.000961272
NTNG1	79.7569258	-3.19265202	0.767197494	-4.161447404	3.16E-05	0.000985829
FAM162B	232.6731231	-2.453705482	0.590368253	-4.156228712	3.24E-05	0.001006823
EGFLAM	448.5221946	-2.069863607	0.498253524	-4.154237765	3.26E-05	0.001012046
TRIP13	744.4425814	2.19706368	0.528829306	4.154580041	3.26E-05	0.001012046
CCNB1	1474.911958	2.444729683	0.589641509	4.146128868	3.38E-05	0.001046697
HTR2C	32.32104306	-3.972557656	0.958640399	-4.143949766	3.41E-05	0.001054841
LRRN1	581.7538852	-2.241004312	0.541011579	-4.142248336	3.44E-05	0.001060835
NLRP11	61.11000902	3.61059604	0.87205051	4.140351964	3.47E-05	0.00106777
KCNB1	99.36913277	-2.914219131	0.704298552	-4.137761073	3.51E-05	0.001078008
SHE	394.5607602	-2.331131019	0.563451486	-4.137234666	3.52E-05	0.001078598
WSCD2	108.7820418	-3.200508862	0.77378418	-4.136177692	3.53E-05	0.001081687
SLITRK3	31.93748529	-3.818250944	0.924149344	-4.131638428	3.60E-05	0.001101357
HCFC2	736.165065	-1.863041	0.451036316	-4.130578704	3.62E-05	0.001104526
KCNK2	96.63038918	-3.282041301	0.795104213	-4.127812741	3.66E-05	0.001115955
HERC5	308.3139141	-1.839357727	0.445802785	-4.125944901	3.69E-05	0.001123106
ZNF506	388.7514896	-1.779999945	0.431792014	-4.122354951	3.75E-05	0.001138788
KIF4A	515.5234916	2.348251017	0.569978402	4.119894736	3.79E-05	0.001149031
SNHG3	1963.766136	1.740076004	0.422461753	4.118895953	3.81E-05	0.001152036
SCN3A	64.2061694	-2.870618954	0.697215826	-4.117260173	3.83E-05	0.001158246
LAYN	401.7202654	-1.893998977	0.460291343	-4.114782962	3.88E-05	0.001168747
IGF2BP3	343.6655389	1.8378311	0.446980611	4.111657314	3.93E-05	0.001180636
KCNJ8	431.4812039	-1.980563843	0.481675873	-4.111818659	3.93E-05	0.001180636
CHRD	915.2949115	-2.248015032	0.547456867	-4.106287032	4.02E-05	0.001204292
CKS2	930.323711	2.048110401	0.498758985	4.106413045	4.02E-05	0.001204292
APBA2	1134.544607	1.598478776	0.389913576	4.099571991	4.14E-05	0.001237662
ACBD7	175.7948292	2.445400494	0.597012885	4.096059826	4.20E-05	0.001252329
TSPAN32	61.78117195	-3.279443381	0.800633999	-4.096058102	4.20E-05	0.001252329
LRRC32	1900.897579	-2.265910716	0.553398261	-4.094538916	4.23E-05	0.001258435
FXYD5	1495.210913	-1.750480653	0.427832247	-4.091511717	4.29E-05	0.001272825
CDCA8	432.7178471	2.519930124	0.616329571	4.088608176	4.34E-05	0.001286686
SNCAIP	1945.194471	-2.23262172	0.546194383	-4.087595533	4.36E-05	0.001290138
AUNIP	148.0095792	2.830488548	0.692796388	4.085599458	4.40E-05	0.001294741
DENND5B	482.8746338	-1.604929812	0.392790536	-4.085968641	4.39E-05	0.001294741
TMOD2	623.035875	-2.211042044	0.541095136	-4.0862353	4.38E-05	0.001294741
GFRA1	220.7150365	-3.18787173	0.780964769	-4.081966122	4.47E-05	0.001312955
COL28A1	323.1458814	-1.728832467	0.423816954	-4.079196101	4.52E-05	0.001326478
TMEM178B	104.3833272	-2.947508629	0.722864006	-4.077542393	4.55E-05	0.001333719
PTGER2	833.7759304	-1.855291725	0.455441715	-4.07360956	4.63E-05	0.001354196
LRP8	573.8632502	1.726960948	0.424152085	4.071560674	4.67E-05	0.001363896
JPH2	364.3465417	-3.290480494	0.808262927	-4.07105211	4.68E-05	0.00136461
BUB1	664.972955	2.33588147	0.57401393	4.06938116	4.71E-05	0.001372158
ERO1B	618.8098033	-2.610695599	0.642163428	-4.065469142	4.79E-05	0.001393074
C1R	11664.78997	-2.121759968	0.522796371	-4.058482591	4.94E-05	0.001433038
GABARAPL1	1835.286157	-1.840999516	0.454110278	-4.054080261	5.03E-05	0.001457885
RECK	671.3067744	-2.418035165	0.596580318	-4.053159473	5.05E-05	0.00146123
MIPEP	1111.504245	1.466451831	0.361908803	4.051992713	5.08E-05	0.001466127
CXorf57	97.37781721	-3.640524293	0.898628687	-4.051199728	5.10E-05	0.00146629
OSR2	2711.594198	-2.407343677	0.59419407	-4.05144346	5.09E-05	0.00146629
STON2	1200.226615	1.57057621	0.388000513	4.047871477	5.17E-05	0.001484861
RASL11A	385.506348	-1.822326991	0.450893943	-4.041586758	5.31E-05	0.001522743
FEZF1-AS1	110.3959403	3.811385384	0.943604244	4.039177875	5.36E-05	0.001533461
HRC	114.6840254	-2.50724914	0.620694549	-4.039425099	5.36E-05	0.001533461
EFEMP1	1328.998059	-2.488876924	0.616610943	-4.036381374	5.43E-05	0.001549327
FBXW9	679.7325994	1.958441734	0.485330531	4.035274127	5.45E-05	0.001554129
SERPINE1	6170.357497	-2.617342033	0.649197577	-4.031657118	5.54E-05	0.001575693
AGTR1	45.30655487	-3.452012386	0.857268545	-4.026757318	5.66E-05	0.001603687
LAMA2	4900.392537	-2.100848583	0.521691723	-4.02699236	5.65E-05	0.001603687
TBC1D2B	2416.778363	-1.56460066	0.388771004	-4.024478789	5.71E-05	0.001616684
CYYR1	880.0888312	-2.141484749	0.532218713	-4.023693071	5.73E-05	0.001619482
SCN4B	110.1550268	-2.780679624	0.691707249	-4.020023831	5.82E-05	0.001642273
SLC9A3	130.2523194	-2.735747974	0.680632042	-4.019422836	5.83E-05	0.001643829
KCTD12	4395.328641	-1.759425144	0.438017286	-4.016793859	5.90E-05	0.001659608
SNCA	216.8686443	-2.422654682	0.60339217	-4.0150582	5.94E-05	0.001669198
PVT1	625.3342742	2.241897969	0.55858559	4.013526325	5.98E-05	0.001677394
LINC01197	35.69106411	-3.168568326	0.79029202	-4.009363938	6.09E-05	0.001701807
OVOL2	396.1084139	1.801893283	0.449409387	4.009469616	6.09E-05	0.001701807
KIF2C	529.6587842	2.356530068	0.588303513	4.005636574	6.19E-05	0.001726125
TIE1	1091.553823	-1.707614565	0.426443901	-4.004312317	6.22E-05	0.001733071
PRICKLE2	1581.424192	-1.913919961	0.478041406	-4.003669842	6.24E-05	0.001735037
SYNC	83.01537475	-2.599522744	0.649701988	-4.001100183	6.30E-05	0.001751219
LDB2	2103.271114	-2.192040915	0.54804123	-3.999773733	6.34E-05	0.001758285
CDC25C	126.3576419	2.704048992	0.676256807	3.998553452	6.37E-05	0.001762319
SMKR1	68.11769089	2.593670022	0.648663046	3.998485869	6.37E-05	0.001762319
PROS1	961.6048322	-2.066655576	0.516932703	-3.997919971	6.39E-05	0.001763763
CLIP3	2197.425082	-2.386883809	0.597137171	-3.997211907	6.41E-05	0.001766272
CREBRF	1367.679012	-1.935500656	0.484382525	-3.995810246	6.45E-05	0.001773976
NAP1L3	277.6383141	-2.519327226	0.630586795	-3.995210881	6.46E-05	0.001775691
RUVBL1	2096.839023	1.66907235	0.418096506	3.992074377	6.55E-05	0.001796541
DPP3	1884.129042	1.468319277	0.368317765	3.986555679	6.70E-05	0.001835961
NLN	1398.789329	1.54752581	0.388394424	3.984418198	6.76E-05	0.001849683
STOM	8114.015119	-1.579751728	0.396826673	-3.980961548	6.86E-05	0.001873877
ADGRB1	78.84503888	-2.819520722	0.708572847	-3.979154343	6.92E-05	0.001885249
LCN6	43.60161412	-3.704603052	0.931353801	-3.977653874	6.96E-05	0.001894245
MYH14	5141.74276	2.040030117	0.512973716	3.97687065	6.98E-05	0.001897555
GIMAP4	843.5502977	-1.859529071	0.467690688	-3.975980531	7.01E-05	0.001901728
CASQ2	100.1150859	-2.996625489	0.753896847	-3.974848151	7.04E-05	0.001907855
PRKCB	374.395771	-1.941521306	0.488596925	-3.973666647	7.08E-05	0.001911458
SCN1B	162.1720512	-2.475188981	0.622880504	-3.973778222	7.07E-05	0.001911458
RPTN	121.8647631	3.211521707	0.808856062	3.970448958	7.17E-05	0.001934487
ABCA6	567.0559292	-2.457870396	0.619408943	-3.968089943	7.25E-05	0.001947757
ZDHHC23	354.7863024	1.901342026	0.479135251	3.968278315	7.24E-05	0.001947757
TPD52L1	2516.339096	1.874241432	0.472716739	3.96482984	7.34E-05	0.001971555
ESCO2	196.0251791	2.545851057	0.642494672	3.962446959	7.42E-05	0.001988307
SLC5A8	937.2793789	-3.426006753	0.865532133	-3.95826639	7.55E-05	0.002020344
DLGAP5	346.001724	2.50282585	0.632651032	3.956092256	7.62E-05	0.002035711
PPP1R14B	3748.631054	1.509373636	0.382264317	3.948507798	7.86E-05	0.002098097
CA10	484.9621317	-3.584718576	0.908375628	-3.946295416	7.94E-05	0.00211436
CENPK	131.8458581	2.261826616	0.57356657	3.943442198	8.03E-05	0.002136449
LINC01139	529.2446988	-2.194779184	0.556870187	-3.941276145	8.10E-05	0.00215258
POU6F1	424.25868	-1.757931959	0.446306679	-3.938843042	8.19E-05	0.002171244
DAW1	34.59101379	-3.564150745	0.905108049	-3.937817974	8.22E-05	0.002177253
FRAT2	1036.375895	1.70648576	0.433834859	3.933491564	8.37E-05	0.002209867
PHF21B	87.36398215	-2.892755672	0.735477845	-3.933164935	8.38E-05	0.002209867
SULT4A1	145.0707994	2.20528257	0.560658765	3.933377495	8.38E-05	0.002209867
KCNMB1	698.3831654	-3.100605131	0.78847909	-3.932387261	8.41E-05	0.002213711
PKP3	1984.157993	2.020073728	0.514159086	3.928888512	8.53E-05	0.002242806
OTUD1	383.147132	-1.719294683	0.437890355	-3.926313205	8.63E-05	0.00226356
CNTFR	105.013919	-2.545483952	0.648461895	-3.925417935	8.66E-05	0.002268609
PCDHB7	126.5644446	-2.245391578	0.572099902	-3.924824266	8.68E-05	0.002270827
TRPM2-AS	110.646743	3.129137935	0.797764622	3.922382429	8.77E-05	0.002290563
ABCB1	560.0737729	-2.482075417	0.632867466	-3.921951354	8.78E-05	0.002291261
SLIT3	2327.852306	-2.706130283	0.69005894	-3.921592965	8.80E-05	0.002291273
LILRB5	117.8278809	-2.906113678	0.741350436	-3.920026936	8.85E-05	0.002302802
KCNC3	1287.362948	2.353770498	0.600662468	3.918624221	8.91E-05	0.002312821
GPIHBP1	65.04293739	-3.274785233	0.836092267	-3.916774934	8.97E-05	0.002327189
VPS9D1-AS1	193.7337398	2.309146146	0.589965013	3.914039127	9.08E-05	0.002350263
FXYD6	1406.911377	-2.731351983	0.698041295	-3.912880228	9.12E-05	0.002358102
DRP2	49.92267341	-3.171574686	0.810658165	-3.91234533	9.14E-05	0.002359863
STMN3	859.8062338	-1.649552567	0.421779028	-3.91094023	9.19E-05	0.002370155
IL16	672.6637805	-1.686805161	0.431479527	-3.909351558	9.25E-05	0.002382302
MAMLD1	306.9381437	-1.791562707	0.458522388	-3.907252417	9.34E-05	0.002399573
LOC80078	46.51955183	3.558479267	0.911255374	3.905029665	9.42E-05	0.002418201
CXCL13	118.8427949	-3.473643444	0.889620451	-3.90463533	9.44E-05	0.002418616
INSR	3363.385633	-1.663053406	0.426000341	-3.903878107	9.47E-05	0.002422668
GPR35	467.4415871	2.454208102	0.628972044	3.901935113	9.54E-05	0.002438653
KIF9	402.5984929	1.696890469	0.435086809	3.900119318	9.61E-05	0.002450867
LRRC4	882.5221598	1.569070585	0.402323404	3.900023141	9.62E-05	0.002450867
RAD51AP1	205.248962	1.88217758	0.482831201	3.898210339	9.69E-05	0.00246571
PRSS1	163.8951849	3.041535487	0.780479912	3.897006754	9.74E-05	0.00247441
PIK3C2G	510.1327661	2.743714665	0.704266808	3.895845485	9.79E-05	0.002482709
ESRP2	1600.253845	1.761872877	0.452341281	3.895007931	9.82E-05	0.002487714
SERTAD4-AS1	319.1128391	-2.013622132	0.517279798	-3.892713655	9.91E-05	0.002507753
C19orf48	2623.430398	1.995184615	0.512607713	3.892225111	9.93E-05	0.002509199
SCD	6277.739565	2.024645308	0.520375154	3.890741691	9.99E-05	0.002520968
SLC35D3	23.20774005	3.753591011	0.964905433	3.890112838	0.000100198	0.002523889
BDKRB2	1498.100088	-2.383061693	0.612657862	-3.889710457	0.000100364	0.002524461
C4orf48	430.4289834	1.738558042	0.447181162	3.887815923	0.00010115	0.002540606
HCST	112.256656	-2.073196874	0.533786741	-3.883942245	0.000102776	0.002577765
CAV1	6416.103708	-2.174559705	0.560557115	-3.879283034	0.000104765	0.002620163
NECAB1	106.6825015	-2.732938873	0.704451438	-3.879527711	0.000104659	0.002620163
CORO2B	215.2384662	-1.800257626	0.46443196	-3.87625698	0.000106076	0.002649179
PPA1	5876.466715	1.546314235	0.399199078	3.8735416	0.000107265	0.002675085
PAICS	4826.335043	1.4592419	0.376959048	3.871088671	0.00010835	0.002698323
CDX2	31.73144751	3.744697597	0.967572995	3.870196477	0.000108748	0.002702727
PRNP	4684.078058	-2.280483671	0.589272027	-3.870001573	0.000108835	0.002702727
TTC9	959.1850669	1.867970694	0.482830961	3.868788135	0.000109378	0.00271238
CACNA1E	239.3065491	3.03797992	0.785711837	3.866531949	0.000110394	0.00272605
LRP1	16498.25249	-2.296476647	0.593897484	-3.866789657	0.000110277	0.00272605
RASGRP2	209.2840967	-1.730822797	0.44763116	-3.866627155	0.000110351	0.00272605
WFIKKN2	33.11229891	-3.56711337	0.923318417	-3.863362093	0.000111837	0.00275781
SLC7A8	2303.854513	-2.269406252	0.58756842	-3.862369343	0.000112293	0.002765167
GAS6-AS2	80.02304141	-2.760254273	0.71521755	-3.859321228	0.000113702	0.002792061
TCHH	445.6291489	2.64439364	0.685165674	3.859495215	0.000113621	0.002792061
GPNMB	13897.53402	-1.62960488	0.42229069	-3.858964732	0.000113868	0.002792237
DHFR	2190.302886	1.622652383	0.420559669	3.858316672	0.000114171	0.00279575
ALDH1A2	3583.167662	-1.809362289	0.469215152	-3.856146337	0.000115189	0.002816753
CENPU	287.979067	1.874573325	0.486469418	3.853424815	0.000116477	0.002844305
SMARCD3	1071.626871	-1.734380558	0.450388909	-3.850850953	0.000117708	0.00287038
C10orf2	800.2685268	1.774889819	0.461261778	3.847901355	0.000119134	0.002899116
COX7A1	432.3166169	-2.03083834	0.527911867	-3.846926858	0.000119609	0.002899116
CUX2	115.0516145	-3.449840668	0.896812447	-3.846780537	0.00011968	0.002899116
LOC101927746	51.67311767	2.977957753	0.774155613	3.846717253	0.000119711	0.002899116
MAGI2	287.5572078	-1.719660273	0.446941541	-3.847617904	0.000119272	0.002899116
FBXO17	473.724176	-2.390427027	0.621566824	-3.845808583	0.000120156	0.002901331
MUC6	1567.111313	-3.466371618	0.901264351	-3.846120858	0.000120003	0.002901331
PRRG3	37.16945489	-3.314642684	0.861949334	-3.845519168	0.000120297	0.002901331
CCNB2	666.4360995	2.344334923	0.609757589	3.844699868	0.0001207	0.002907053
IRS4	57.1703537	-3.481762341	0.905711484	-3.844228987	0.000120932	0.002908656
B3GAT1	88.07615774	-2.541072737	0.661819116	-3.839527562	0.000123271	0.002960869
ANK2	1490.990136	-1.454020351	0.378834041	-3.838145976	0.000123967	0.002970928
ARL9	85.35430557	2.261470922	0.589227832	3.838024614	0.000124028	0.002970928
C2orf40	102.8057864	-3.021879989	0.7879458	-3.835136869	0.000125494	0.002997884
CBLC	657.4143812	2.21820572	0.578373482	3.835247967	0.000125438	0.002997884
VAMP5	453.1689902	-1.863537853	0.486025655	-3.834237626	0.000125954	0.003004788
TAL1	96.40746103	-2.239106234	0.58423709	-3.832530098	0.000126832	0.003021628
APOBEC3G	396.3927221	-1.752670838	0.457458361	-3.831323211	0.000127456	0.003023968
CDC20B	1001.72182	3.4835451	0.909301982	3.831010127	0.000127618	0.003023968
SCGB3A1	3162.1531	-3.564689564	0.930365043	-3.831495594	0.000127367	0.003023968
SNAI1	284.8180753	-2.590692138	0.676073562	-3.83196783	0.000127122	0.003023968
RYR2	209.274594	-1.85439175	0.484101095	-3.830587804	0.000127838	0.003025086
ARMCX1	644.9228945	-2.229088428	0.582019033	-3.8299236	0.000128183	0.003029186
DEPDC1	347.0920447	2.14091441	0.559120992	3.829071776	0.000128627	0.003035609
ZIK1	79.58664066	-2.312531436	0.604184145	-3.827527508	0.000129437	0.003050617
RYR1	89.21420501	-2.402418957	0.627746875	-3.827050444	0.000129688	0.003052441
SH3RF2	645.4207972	1.827357859	0.477549078	3.826534161	0.00012996	0.003054758
LINC00645	592.1965761	3.31158902	0.865788987	3.824937794	0.000130805	0.00306766
PCDHA13	24.96165297	-3.577532243	0.935342109	-3.824838214	0.000130858	0.00306766
MYO10	4820.985512	1.414292148	0.369886827	3.823580742	0.000131527	0.00307925
CLEC14A	844.2267318	-1.799774842	0.470970716	-3.821415598	0.000132688	0.003102284
FBXO27	100.0281015	-2.461233007	0.644122563	-3.821063178	0.000132878	0.003102595
PRKCDBP	1288.20498	-2.179172378	0.57055382	-3.819398453	0.000133778	0.003119465
CMAHP	649.3998562	-2.15860222	0.565369561	-3.818037564	0.000134517	0.003132564
IDH2	3240.678879	1.52101833	0.398427207	3.81755639	0.00013478	0.003134526
KCTD8	31.33180376	-3.054876716	0.800298193	-3.817173076	0.000134989	0.003135251
HTR1F	43.46034389	-2.59340379	0.679472554	-3.816789616	0.000135199	0.003135983
CALCRL	1198.802376	-2.20116961	0.577470103	-3.811746438	0.000137988	0.003196458
ARHGAP28	244.3550798	-2.014346908	0.528530795	-3.811219566	0.000138283	0.003199065
MYOT	28.52847087	-3.448810727	0.905397668	-3.80916679	0.000139436	0.003218835
UBE2C	651.6183935	2.713952449	0.712501743	3.809046751	0.000139504	0.003218835
DNM1	1273.47694	-1.999917345	0.525888468	-3.8029306	0.000142994	0.003295056
NR3C1	1685.636554	-2.220503013	0.584304879	-3.800247256	0.000144552	0.003326583
N4BP2L1	592.7393138	-1.474194093	0.387973292	-3.799730872	0.000144853	0.003329165
USP51	235.0220503	-1.935608729	0.510026995	-3.795110356	0.000147578	0.003387354
HJURP	357.7885645	2.544314692	0.670597892	3.794098852	0.000148181	0.003396756
ATIC	3169.621807	1.392789187	0.367238293	3.792603364	0.000149076	0.003412835
FOXF1	268.5932584	-2.70427874	0.713748627	-3.78883915	0.000151353	0.00346045
SLC25A15	490.3070069	1.638889841	0.432673742	3.787819045	0.000151975	0.003470172
CBFA2T3	225.3020498	-2.485372424	0.656248739	-3.787241446	0.000152329	0.003473186
MYBL2	1179.202917	2.799522409	0.73925351	3.78695856	0.000152503	0.003473186
AGPAT9	120.6334844	-2.087672939	0.551413169	-3.78604113	0.000153066	0.003477019
HVCN1	281.4468255	-1.871352143	0.494269216	-3.786098914	0.000153031	0.003477019
RCC2	6122.743183	1.414985764	0.373823564	3.785170063	0.000153604	0.003484718
COL8A2	283.9980487	-2.57474201	0.680825476	-3.781794454	0.000155702	0.003527772
TOMM40	1798.457298	1.498535785	0.396437997	3.780000398	0.000156828	0.003548715
THOP1	1259.934545	1.789930478	0.473658228	3.778949399	0.000157491	0.003559144
BUB1B	615.0011096	2.54469475	0.673467292	3.778497901	0.000157777	0.003561025
CADM2	20.53923292	-3.653481581	0.967030393	-3.778042144	0.000158066	0.003562973
C16orf45	1520.20261	-2.112774126	0.559792807	-3.774207349	0.000160517	0.00361359
ORC6	247.556837	2.699044991	0.715246172	3.773588867	0.000160916	0.003617932
GRIA3	98.41468796	-2.802412201	0.742790288	-3.772817504	0.000161414	0.003624505
MCM10	270.3669793	2.75444762	0.730229504	3.772030033	0.000161925	0.003631328
IFFO1	498.5675575	-1.926807351	0.510972124	-3.770865886	0.000162682	0.003639029
PBK	258.3249642	2.306272786	0.611566693	3.771089587	0.000162536	0.003639029
C10orf82	49.12774871	2.963498953	0.786699349	3.767003183	0.000165219	0.003689967
FHL5	156.377834	-2.666484409	0.707898438	-3.766761257	0.000165379	0.003689967
CDC45	295.1511687	2.358099825	0.626373749	3.764684945	0.000166759	0.003715626
LINC01163	19.93439875	3.644547664	0.968162492	3.764396675	0.000166952	0.003715626
PDE5A	1599.707339	-2.177715716	0.578715607	-3.763015356	0.000167877	0.003727891
SNHG16	5753.367332	1.374960784	0.365395255	3.762940991	0.000167927	0.003727891
TPST1	886.5806497	-1.582234658	0.420569191	-3.762126883	0.000168475	0.003735333
MSX2	2397.915716	2.764160197	0.73502166	3.760651349	0.000169472	0.003752705
A2M	28487.77083	-1.527767076	0.406448583	-3.758820033	0.000170717	0.00377552
GSG2	160.4832759	2.571351183	0.68443602	3.756890501	0.000172038	0.003799959
NPNT	1203.308486	-2.582313306	0.687548613	-3.755826506	0.00017277	0.003811353
CADPS2	2413.515621	-1.569539155	0.417968401	-3.755162233	0.000173229	0.003816687
ADGRD1	418.2847793	-2.705282544	0.720513427	-3.754659446	0.000173577	0.00381957
ACKR1	1367.937502	-2.411888855	0.642600442	-3.75332586	0.000174504	0.003826601
MYOZ3	65.58024805	-3.040293389	0.809988109	-3.753503733	0.00017438	0.003826601
PAK3	72.20280179	-3.458708932	0.921521321	-3.753259804	0.00017455	0.003826601
THEM6	1375.76711	1.791415439	0.477489524	3.751737684	0.000175613	0.003845119
SCN3B	85.35461616	-2.361091093	0.62948734	-3.75081585	0.00017626	0.003849696
SNHG4	103.3959394	2.847981297	0.759246876	3.751060936	0.000176088	0.003849696
CNTN1	861.7348536	-2.133728024	0.569117987	-3.749183951	0.000177411	0.003870023
CBX8	293.1744972	1.605666976	0.428338039	3.748597672	0.000177826	0.003874273
NOTUM	675.8033293	2.914574988	0.77795264	3.746468409	0.000179342	0.003902455
NETO2	458.5622876	1.771629499	0.473141291	3.744398412	0.000180827	0.003929903
GRK5	476.8514351	-1.802675436	0.48166816	-3.742567157	0.00018215	0.003953776
ABCA3	237.4650748	-2.137429313	0.571203133	-3.741977575	0.000182578	0.003958179
DSP	15669.48208	1.642129145	0.438892642	3.741528084	0.000182905	0.003960383
ADCY1	418.9151503	-1.709835645	0.457106722	-3.740561152	0.00018361	0.003970761
CD209	317.8657432	-2.492383449	0.666454249	-3.739766762	0.000184191	0.003978437
CDT1	574.0995055	2.595442111	0.694219453	3.738647917	0.000185013	0.003991278
FAXDC2	1258.975269	-1.950836709	0.521991079	-3.737298947	0.000186008	0.004007828
DDR2	1159.668699	-2.362909071	0.632418972	-3.736303264	0.000186745	0.004018798
AIM1L	320.4034366	1.816057684	0.486417775	3.733534785	0.000188811	0.004056194
FOXD2	62.58962573	-2.395133176	0.641549474	-3.733356935	0.000188945	0.004056194
ADCYAP1R1	691.1473483	-2.762947729	0.74034032	-3.731996834	0.000189968	0.004068228
CCL2	1848.118764	-2.305480887	0.617720798	-3.73223776	0.000189786	0.004068228
LRRN3	96.64158751	-2.48474888	0.665978159	-3.730976526	0.000190739	0.004079004
PYCR1	2573.146695	1.66934746	0.447460138	3.730717706	0.000190935	0.004079004
MYB	354.3218875	2.455772242	0.65852698	3.729190023	0.000192096	0.00409883
TOP2A	2501.550191	2.071039756	0.555478568	3.728388235	0.000192708	0.004106907
AXL	2499.042277	-1.734083053	0.465229861	-3.727368336	0.00019349	0.004118564
PLXND1	3775.154082	-1.329918428	0.357154663	-3.723648512	0.000196364	0.004174699
LAD1	4571.685758	1.908798503	0.512665868	3.723279865	0.000196651	0.004175753
FAM180A	149.6981806	-3.086659134	0.829171439	-3.722582553	0.000197195	0.004182255
PLN	903.4529255	-3.25218432	0.873773568	-3.721998971	0.000197652	0.004186885
MBNL1-AS1	271.7323046	-2.42811678	0.652464048	-3.721456819	0.000198077	0.004190154
PDZRN4	40.19677887	-3.342863332	0.898330764	-3.721194317	0.000198283	0.004190154
ARHGAP24	469.5401118	-2.144441608	0.577358589	-3.714228298	0.000203825	0.004291792
HSPA12B	366.4925772	-2.222886387	0.598466256	-3.714305303	0.000203763	0.004291792
TRPM2	400.134014	1.564577866	0.421214837	3.714441488	0.000203653	0.004291792
SLC14A1	365.0003314	-2.983859039	0.803542507	-3.713380453	0.000204509	0.004301051
ZNF662	305.9272849	-2.105653897	0.567494344	-3.710440326	0.000206899	0.004346116
GNAO1	197.1217186	-2.587344787	0.697552595	-3.709175199	0.000207936	0.004357476
PBX3	679.2584893	-2.112453763	0.569505386	-3.709277938	0.000207851	0.004357476
WDR4	681.8073087	1.856163371	0.501181049	3.703578523	0.000212579	0.004449488
BID	975.3695815	1.373995456	0.371125709	3.702237337	0.000213707	0.004467763
C8orf88	61.95650691	-2.889864156	0.780748912	-3.701400171	0.000214413	0.004477209
NRG2	152.944059	-2.223384687	0.600763992	-3.70092868	0.000214812	0.004480216
KSR1	968.0728248	-1.393922592	0.37702124	-3.697199113	0.000217991	0.004539718
WSCD1	53.42702064	-2.370895968	0.641306479	-3.696978038	0.000218181	0.004539718
ZCCHC24	2346.417647	-2.178568878	0.589443791	-3.695973916	0.000219045	0.004552314
KPNA2	3782.589514	1.710951066	0.463396823	3.692194209	0.000222328	0.004615069
C1QBP	3102.730931	1.586760957	0.429802753	3.691835258	0.000222642	0.004616139
ANKRD44	620.9460392	-1.685104031	0.4565162	-3.691225044	0.000223177	0.004620064
PRKX	6789.975194	1.701585814	0.461006925	3.69102007	0.000223357	0.004620064
VSIG2	320.8118292	-2.702703414	0.7326817	-3.688782477	0.00022533	0.004655403
KCNH3	174.2938936	2.617253438	0.709959808	3.686481133	0.000227376	0.004692171
UCP2	4544.964059	1.808759748	0.490702048	3.686065209	0.000227748	0.004694333
GAPDH	89131.50102	1.366587358	0.371071869	3.682810457	0.000230677	0.004743576
GPR153	728.2572135	-1.466263252	0.398123632	-3.682934477	0.000230564	0.004743576
CALHM2	1133.883893	-1.973927987	0.536141273	-3.681731079	0.000231656	0.004752591
LRRC73	111.5146414	2.253300113	0.611986601	3.681943542	0.000231463	0.004752591
KCND3	122.2628159	-2.071626607	0.562966367	-3.679840802	0.00023338	0.004778401
PAX8	6412.794055	1.869408951	0.508025264	3.679755879	0.000233457	0.004778401
IGFBP4	20657.14588	-2.24250429	0.609469621	-3.679435712	0.000233751	0.004778841
MPZ	98.54134562	-2.170571428	0.589974401	-3.679094251	0.000234064	0.004779685
CCDC69	1784.421609	-1.528663862	0.415590597	-3.678292709	0.0002348	0.004789166
SYN2	60.8178777	-2.26609894	0.616171033	-3.677710927	0.000235336	0.004794537
TSACC	36.59748794	2.610729153	0.710951762	3.672160745	0.000240508	0.004894233
DTL	430.1731987	2.062238874	0.561860342	3.670376282	0.000242194	0.004922831
PDE3A	1232.512451	-1.673814743	0.45627308	-3.668449479	0.000244026	0.00494293
SFRP2	900.3942114	-3.239269614	0.882997957	-3.668490498	0.000243987	0.00494293
SGOL1	144.9990658	2.400572549	0.654359252	3.668585021	0.000243897	0.00494293
JADE2	1565.682365	-1.490495857	0.406571939	-3.666007696	0.000246367	0.004984598
CECR2	129.8726173	-1.884971181	0.514317781	-3.664993222	0.000247345	0.004998646
TACC1	7271.777667	-1.855421237	0.506427563	-3.663744573	0.000248555	0.00501209
TROAP	297.8382539	2.551778773	0.696499788	3.663717947	0.000248581	0.00501209
ABCA8	1159.72601	-2.608647576	0.712079492	-3.663421857	0.000248868	0.005012142
MAN1A1	2464.02198	-1.45823571	0.398127838	-3.662732349	0.000249539	0.005016071
NAALADL1	176.9440895	-2.10427594	0.574570993	-3.662342802	0.000249919	0.005016071
TRPA1	94.13341328	-3.25694032	0.889284883	-3.662426275	0.000249838	0.005016071
BYSL	730.4064029	1.521547929	0.415663492	3.660528186	0.000251696	0.00503449
HNMT	1448.411999	-1.452697049	0.396830571	-3.66074883	0.000251479	0.00503449
PRDM16	52.09212453	-3.252727476	0.888503761	-3.660904568	0.000251326	0.00503449
BEND6	161.1692433	-2.753891986	0.752410895	-3.660090521	0.000252126	0.005037366
ADRA1D	119.6812863	-2.91569175	0.796780749	-3.659340107	0.000252866	0.005046404
APOB	28.82283111	-3.400293598	0.930015455	-3.656168915	0.000256013	0.005103419
PAQR4	399.794422	1.858722053	0.508501787	3.65529109	0.00025689	0.005115114
C11orf96	3087.94972	-2.728687604	0.747216582	-3.651802795	0.000260406	0.005179248
GZMK	115.0253751	-2.335201362	0.639658821	-3.650698288	0.000261528	0.005195696
RCC1	2176.405009	1.413317295	0.387196502	3.6501293	0.000262108	0.005201342
FLNC	2832.238616	-2.934016609	0.805026071	-3.644623095	0.000267784	0.005296038
ITPR1	2178.720257	-1.749658972	0.479990915	-3.645191848	0.000267192	0.005296038
KATNAL1	582.9529337	-1.964723574	0.539051756	-3.644777242	0.000267624	0.005296038
AURKA	388.0357278	1.924476125	0.528231134	3.643246298	0.000269221	0.005318476
TP53	4342.822961	1.474326157	0.40496708	3.640607421	0.000271996	0.005367258
RAMP2	979.6063102	-1.868944321	0.513460198	-3.639901061	0.000272743	0.005375969
WDR12	915.2643624	1.376593021	0.378265222	3.639227032	0.000273458	0.005384023
GALNT13	104.7566351	-2.948430272	0.810295177	-3.638711368	0.000274006	0.005386091
SKA1	235.7211997	2.224051596	0.611246353	3.638551926	0.000274175	0.005386091
NCAPH	350.4791371	2.47557372	0.680473018	3.638018928	0.000274743	0.005391223
EGR1	26684.08296	-1.425932444	0.391988643	-3.637688155	0.000275096	0.005392131
C21orf58	469.1587045	2.224146378	0.611740562	3.635767374	0.000277154	0.005426021
KHDRBS3	376.2697493	-1.572259616	0.432474156	-3.635499591	0.000277442	0.005426021
APOL4	3003.556444	2.073113807	0.570407032	3.634446443	0.000278578	0.005442178
SORBS1	3136.522918	-2.524873029	0.694960138	-3.63311921	0.000280016	0.005464188
SLC1A7	27.14408519	-3.291843106	0.90664156	-3.63080985	0.000282533	0.005507207
HIP1R	1372.931421	1.504825714	0.414756518	3.628214745	0.000285388	0.005556688
EPHA1	575.7004623	1.730694262	0.477074153	3.627725903	0.000285929	0.005561058
CMTM5	18.81995037	-3.521639057	0.971193649	-3.626093579	0.000287741	0.005584961
IFNLR1	252.2613587	1.784483273	0.492129095	3.626047089	0.000287793	0.005584961
PI15	1066.472713	-2.672456259	0.737119447	-3.625540298	0.000288358	0.005589756
ABTB1	650.0625805	-1.46452182	0.404109678	-3.624070141	0.000290003	0.005615453
BCL6B	417.4114074	-1.690541654	0.466576063	-3.623292726	0.000290876	0.005626169
CCT3	10966.17882	1.335638362	0.368787564	3.621701198	0.000292672	0.005651773
STC2	1779.009625	1.997655543	0.551602334	3.621550202	0.000292843	0.005651773
ACTR3B	348.242186	1.677504743	0.463255326	3.621123492	0.000293326	0.005654897
MAP10	86.75059351	-2.528739305	0.699113756	-3.617064151	0.000297963	0.005738
TLE4	664.6663946	-1.745762841	0.483586024	-3.610035763	0.000306155	0.005889293
JAK2	811.8463799	-1.449797686	0.401658283	-3.609530159	0.000306752	0.005894334
GABRP	13980.80187	2.870237369	0.795421364	3.608448929	0.000308033	0.005912488
C12orf75	2462.394089	1.475877371	0.409298057	3.605874367	0.000311104	0.005958414
YDJC	695.2624562	1.704671408	0.472745538	3.605896347	0.000311077	0.005958414
SOCS3	12411.76117	-2.291027469	0.635461624	-3.605296344	0.000311797	0.005965194
SOX8	61.91304832	-2.301272009	0.638588346	-3.6036862	0.000313736	0.005995764
FOXP4-AS1	31.85287069	2.976257456	0.82618161	3.602425204	0.000315262	0.006018392
GIPC1	3398.020378	1.272819282	0.353365218	3.601993677	0.000315786	0.006021855
FOXM1	873.7028321	2.346421261	0.651489268	3.601626879	0.000316232	0.006023826
H19	4243.081626	-1.947618925	0.540852896	-3.601014137	0.000316978	0.006031134
RBP7	83.52915385	-2.67770342	0.743651774	-3.600749053	0.000317302	0.006031134
SGCD	1371.707446	-1.292499603	0.359031124	-3.599965342	0.00031826	0.006042808
TXNIP	26315.2957	-1.73288724	0.481681428	-3.597579521	0.000321192	0.006091913
BLM	259.1887106	2.130620593	0.592514039	3.59589892	0.000323273	0.006122092
MMP19	1798.488152	-2.581800256	0.718017859	-3.595732644	0.00032348	0.006122092
PECAM1	2869.861253	-1.856320631	0.5163788	-3.594881567	0.000324539	0.006135535
MKI67	3714.593979	2.319949657	0.645426657	3.594443509	0.000325086	0.006139266
PAFAH1B3	695.530642	1.692233865	0.471025419	3.592659326	0.00032732	0.006174836
ALPL	3978.738303	2.492335848	0.693978972	3.591370846	0.000328943	0.006184012
GLIPR2	1277.200974	-2.121490237	0.590708612	-3.591432721	0.000328865	0.006184012
LINC01088	217.16291	-2.795354201	0.778399406	-3.591156645	0.000329214	0.006184012
RGMA	907.5607536	-2.438307162	0.678861755	-3.591758031	0.000328455	0.006184012
ARHGAP20	192.9382198	-2.285598742	0.636632118	-3.590140487	0.0003305	0.006194933
CBX2	542.5926884	2.381624375	0.663375048	3.590162735	0.000330472	0.006194933
PTGS2	7363.242225	-2.61134873	0.727713925	-3.588427597	0.000332678	0.006229128
NIPSNAP1	3011.959482	1.619447342	0.451411219	3.587521252	0.000333837	0.006244164
PTPRB	1411.232047	-1.756692231	0.489842884	-3.586236091	0.000335485	0.006268333
KCNIP4	129.2691331	-1.91759724	0.535154951	-3.583256097	0.000339338	0.006333582
DUSP1	26871.35222	-1.797875787	0.501793868	-3.582897084	0.000339805	0.00633557
RNFT2	86.68505354	2.245652619	0.627333252	3.579680514	0.000344015	0.006407271
PGAM5	1413.803839	1.437081639	0.401656326	3.57788872	0.000346381	0.006444517
BCAP29	2131.712875	-1.257871613	0.351655408	-3.577000622	0.000347559	0.006459607
MAOB	2441.295944	-1.361884695	0.380764654	-3.576709866	0.000347946	0.006459965
CORO6	65.1313777	-2.184363767	0.610944731	-3.575386865	0.00034971	0.006485873
GABBR1	1247.073253	-2.162355209	0.605024581	-3.57399563	0.000351575	0.006513581
COLCA1	434.9072341	1.555873227	0.435464058	3.572908487	0.000353038	0.006533807
KIF26A	335.8181181	-2.059657648	0.576523415	-3.572548132	0.000353524	0.006535928
ADRA2A	3227.784196	-1.897586033	0.531307673	-3.57153892	0.00035489	0.006544344
C10orf128	311.5539855	-1.600600128	0.448117461	-3.571831647	0.000354493	0.006544344
NAP1L5	324.0796039	-1.712952374	0.479666634	-3.571130973	0.000355443	0.006544344
PRDM8	302.6881296	-2.492835849	0.698055874	-3.5711122	0.000355469	0.006544344
SOX10	83.5907346	-3.102828657	0.869008868	-3.57053739	0.00035625	0.006551862
MAP7D2	117.1566374	2.157172463	0.604217499	3.570191969	0.00035672	0.006553653
FAM169B	34.90436275	-3.357350687	0.941357691	-3.566498388	0.000361783	0.006639738
WNT7A	309.1387933	1.624137456	0.455464695	3.565890996	0.000362622	0.006648198
CEP55	425.9734676	2.012120282	0.564398007	3.565073332	0.000363754	0.006662012
ADAM22	509.7709354	-1.675341328	0.470018842	-3.564413119	0.000364671	0.006664916
KIF11	666.1549214	2.031138065	0.569834848	3.564432873	0.000364644	0.006664916
LGALS2	100.3508366	-2.106757954	0.591166907	-3.563727822	0.000365625	0.00667541
SLC3A1	966.8053973	3.063370366	0.859997652	3.56206829	0.000367945	0.006710791
CACNA1C	887.7838942	-2.38348426	0.66925003	-3.561425707	0.000368846	0.006720268
PLAC4	168.6954629	1.77949112	0.499745512	3.560794598	0.000369734	0.006729469
AEBP1	14903.14501	-2.216497256	0.622547645	-3.56036566	0.000370339	0.006733501
ST6GALNAC3	145.3138389	-1.984706485	0.557632188	-3.559167721	0.000372032	0.006757298
EMP3	1743.267796	-1.946961506	0.547159444	-3.558307417	0.000373252	0.006772469
MLK7-AS1	76.11700642	-2.265054704	0.636657171	-3.557730608	0.000374073	0.006780356
IGFBPL1	193.2538444	2.774991851	0.780095587	3.557245929	0.000374763	0.006785878
LOC149684	18.43932752	-3.353877437	0.943344148	-3.555306348	0.000377539	0.006829104
FOSL2	6987.95762	-1.406869819	0.395801013	-3.554487665	0.000378716	0.00684336
KDR	2455.771861	-2.049275728	0.576630379	-3.553880962	0.000379591	0.006850006
PDE3B	226.4787907	-2.1821512	0.614051799	-3.55369238	0.000379863	0.006850006
ADGRF5	1478.835873	-1.678265298	0.47238779	-3.552727933	0.000381259	0.006868123
TMEM45B	265.6737097	2.157909504	0.607804444	3.550335188	0.000384741	0.006923762
KIF15	253.1741095	2.255347673	0.635664738	3.548014447	0.000388147	0.006977913
C17orf53	184.4731382	1.877400969	0.529432542	3.546062662	0.000391033	0.007022621
ERCC6L	140.9243495	2.023798897	0.570942558	3.54466289	0.000393116	0.007052813
FANCD2	594.0880205	1.850747522	0.522389939	3.542846799	0.000395833	0.007094321
GGT5	1371.729898	-1.929149847	0.544605924	-3.54228583	0.000396675	0.007102186
LOC644285	124.3988882	-1.793605644	0.506670206	-3.539986408	0.000400148	0.007157066
C2orf15	160.8000782	1.98695428	0.561419021	3.539164518	0.000401396	0.007170317
ZNF295-AS1	171.2228937	3.073533457	0.86848452	3.538961706	0.000401704	0.007170317
XPNPEP2	42.13098726	-3.312587549	0.936771638	-3.53617404	0.000405967	0.007239061
AP1M2	2638.309246	1.757432852	0.497152123	3.535000197	0.000407775	0.007256576
MAGEL2	148.4088677	-2.550489885	0.721462264	-3.53516741	0.000407517	0.007256576
ADCY5	412.9161976	-2.235029366	0.632404128	-3.534178967	0.000409044	0.007271802
HNF1A-AS1	151.0378557	2.52045033	0.713622136	3.531911643	0.000412567	0.007319569
UBE2T	317.6807396	2.08611771	0.590692549	3.531647241	0.00041298	0.007319569
WDR77	1879.061253	1.461604373	0.413843295	3.531782172	0.000412769	0.007319569
HSPB2	111.5486059	-2.40895407	0.682759937	-3.52825926	0.000418302	0.007398984
RNF183	294.7381392	2.320018056	0.657524114	3.528415166	0.000418056	0.007398984
RASSF8	1318.407059	-2.270086746	0.644090587	-3.524483652	0.000424309	0.007497689
BRE-AS1	524.4870769	-2.469195179	0.700949777	-3.522642077	0.000427268	0.007537673
RAD54L	268.618097	2.209599034	0.627273994	3.522542071	0.000427429	0.007537673
TMEM200B	394.0387752	-2.509373055	0.712643797	-3.521216443	0.000429572	0.007567868
DIAPH3	297.2819377	2.064519027	0.587053838	3.516745645	0.000436872	0.007688776
GATA3	63.16128721	-2.318262162	0.659340261	-3.516033068	0.000438046	0.007701732
ORC1	290.3540552	2.537652162	0.722060165	3.514460822	0.000440648	0.007732003
SOD3	1999.180063	-2.149585799	0.611628587	-3.514528009	0.000440536	0.007732003
RNF17	41.54690676	3.316007656	0.943776717	3.513551031	0.000442159	0.007750795
IGFBP3	18017.80955	-1.514828562	0.431212766	-3.512949249	0.000443162	0.007760634
JAM3	1500.997657	-2.123278778	0.604879796	-3.510249132	0.000447687	0.007832073
CCR2	73.94316994	-2.172251801	0.618921241	-3.509738653	0.000448547	0.007839323
NFATC4	2170.228966	-1.922033506	0.547690747	-3.509340841	0.000449219	0.007843263
RAB25	2340.278199	1.942835225	0.553703348	3.508801658	0.00045013	0.007851383
CHD7	2186.039352	1.249363084	0.3563339	3.506158364	0.000454625	0.007921913
CPVL	800.0435471	-1.98898681	0.567602239	-3.504191267	0.000457996	0.007967345
XYLT1	1345.368083	-2.427848448	0.692857619	-3.504108753	0.000458138	0.007967345
CHEK2	448.6416036	1.393912664	0.398036758	3.501969693	0.000461832	0.008023649
LOC100288152	88.55594827	-2.002614704	0.57191667	-3.501584778	0.0004625	0.00802411
NUP210	2048.255509	1.663702277	0.475149603	3.501428319	0.000462771	0.00802411
RFC3	611.6938302	1.462785195	0.418062309	3.498964544	0.000467069	0.008090642
CA4	84.34286873	-3.076867875	0.879583376	-3.498096891	0.000468591	0.00810902
FAM155B	235.2651916	1.635610241	0.468089058	3.494228743	0.000475433	0.008219343
ASTN1	57.7781644	-2.782530024	0.796804923	-3.49210948	0.000479222	0.008273511
CRYAB	1728.692592	-1.708443687	0.48925204	-3.49195005	0.000479508	0.008273511
DOCK10	765.3772071	-2.254776265	0.64594406	-3.490668005	0.000481815	0.008290755
PTTG1	612.7134079	1.960679891	0.561701467	3.490608459	0.000481922	0.008290755
VGLL1	54.59348187	2.326139232	0.666371922	3.490752172	0.000481663	0.008290755
CCT5	5918.240084	1.256229708	0.360078997	3.488761408	0.000485264	0.008340091
SUSD3	104.8644486	-1.96402935	0.563357926	-3.486290435	0.000489769	0.008409295
KITLG	847.5812594	-1.713355155	0.491727972	-3.484355685	0.000493323	0.008462061
EZH2	794.7391855	1.672936668	0.480344267	3.482786791	0.000496223	0.008503509
COL14A1	4447.898888	-2.41181074	0.692789646	-3.481303097	0.000498981	0.00854243
PLA2G3	31.81922246	2.675732651	0.769826505	3.475760622	0.000509407	0.00870463
TPX2	1497.225876	2.278238288	0.655468478	3.475740426	0.000509445	0.00870463
PCDHGA5	108.2156799	-2.052347326	0.590544603	-3.475346847	0.000510193	0.008708949
MND1	116.5901325	2.315100306	0.666285045	3.474639454	0.00051154	0.008715023
SLC5A12	20.11818375	3.296831821	0.948826753	3.474640453	0.000511538	0.008715023
AMH	56.40736783	2.741483842	0.789352458	3.473079503	0.000514523	0.008750079
CXADR	3325.722117	1.819114406	0.523781178	3.473042717	0.000514593	0.008750079
SCUBE2	795.6684938	-2.151822599	0.620261207	-3.469220024	0.000521972	0.008866964
TACC3	1095.690134	1.761428658	0.507829955	3.468540288	0.000523294	0.008880846
BPI	24.74236962	-3.09324563	0.891901573	-3.468146847	0.000524061	0.008885282
IHH	415.2770575	1.428426883	0.412047503	3.466655839	0.000526976	0.008926103
KLK10	1900.74748	2.196421439	0.633744827	3.465782043	0.000528692	0.00893794
PLXNB3	273.4903399	-2.146437081	0.619300604	-3.465905036	0.00052845	0.00893794
HAPLN4	73.46261197	-2.071432134	0.597778155	-3.465218858	0.0005298	0.008948075
WFDC1	659.1995649	-1.783541467	0.515215591	-3.461738148	0.000536699	0.009055895
MEST	1812.255623	1.907186244	0.551297633	3.459449363	0.000541281	0.009124452
MYO15B	1660.475289	-1.344370904	0.389029774	-3.455701837	0.000548862	0.009243384
PYGM	181.1912389	-2.195678588	0.635487505	-3.455108982	0.00055007	0.009254869
MAP3K12	795.1686941	-1.718180092	0.497685736	-3.452339432	0.000555748	0.009341457
FGL2	1042.114178	-1.790691747	0.518824503	-3.451440203	0.000557603	0.009354753
VARS	3475.968816	1.385451122	0.401386834	3.4516606	0.000557148	0.009354753
RAET1K	32.97479728	2.765635101	0.801532396	3.450434587	0.000559685	0.009380722
PPM1K	1369.205437	-1.523197078	0.441898669	-3.446937465	0.00056698	0.009493942
DNAJC15	3898.103017	1.189621814	0.345193395	3.446247325	0.00056843	0.009500127
GLT8D2	803.727728	-2.411343851	0.699675378	-3.446375171	0.000568161	0.009500127
AP3B2	43.5814252	-2.646467247	0.768171713	-3.445150613	0.000570741	0.009523525
MAPT	117.6844374	-1.897605603	0.550817846	-3.445069215	0.000570913	0.009523525
LARP6	813.9327315	-1.666924053	0.483905816	-3.444728284	0.000571634	0.009526506
TNFRSF1B	1063.757363	-1.750366594	0.508183316	-3.444360604	0.000572412	0.009530438
CCL4	273.5140284	-1.491496109	0.433157924	-3.443307914	0.000574645	0.009558564
GOLGA8A	1408.295151	-1.428005615	0.415271422	-3.438728357	0.000584453	0.009712532
ANXA3	1705.537765	1.787714536	0.519917956	3.438455079	0.000585044	0.00971316
CCDC102B	88.51730524	-2.190525134	0.637285884	-3.437272327	0.000587604	0.009737288
GYPC	1023.677814	-1.778886033	0.517491102	-3.437520037	0.000587067	0.009737288
AOAH	382.4341137	-2.100944204	0.611338462	-3.436630172	0.000588999	0.00975121
HMGA1	7430.002103	1.636215366	0.476668317	3.432607763	0.000597806	0.009887704
NXPE3	491.8000361	-1.693521998	0.493590457	-3.431026622	0.000601302	0.00993617
CDCA2	176.2012693	2.260351345	0.659055355	3.429683606	0.000604285	0.009974473
METTL7B	188.1153417	2.449873389	0.71435852	3.429473183	0.000604754	0.009974473
GADD45B	3574.241415	-1.853175752	0.54046223	-3.428871899	0.000606096	0.009987227
HSPA1A	2459.682494	-2.214450925	0.646042781	-3.427715609	0.000608683	0.010012092
MCM4	2838.972244	1.629595312	0.475421054	3.427688568	0.000608743	0.010012092
SLC25A5	6213.332715	1.272630928	0.371596517	3.424765496	0.00061533	0.010110969
SYNPO2	7220.348217	-2.297676808	0.671284018	-3.422808749	0.000619777	0.010174522
ZFP36L1	32685.95721	-1.23550261	0.360998975	-3.422454617	0.000620585	0.010178282
ROBO4	644.5908732	-1.586538173	0.463724746	-3.42129288	0.000623242	0.010212336
MXRA8	3875.448012	-1.987744979	0.581400603	-3.418890466	0.00062877	0.010293333
MYLK	17262.96146	-2.434298671	0.712718032	-3.415514357	0.000636617	0.010412089
SAMD10	264.3699114	1.952563746	0.571731575	3.415175635	0.000637409	0.010415357
MID2	846.1599345	-1.330629651	0.389688597	-3.414597348	0.000638764	0.010427801
RRM2	1261.465372	2.241555229	0.656595637	3.413905155	0.000640389	0.010444632
RASA4B	48.768743	-2.498551884	0.73194583	-3.41357486	0.000641165	0.010447609
FSTL4	95.2983178	2.246909945	0.658297994	3.413210983	0.000642022	0.010451883
STARD9	981.419917	-1.894111956	0.55501154	-3.412743372	0.000643125	0.010460147
FBXO32	2597.691668	-2.136259575	0.626105552	-3.411979926	0.000644929	0.010479792
RCAN2	572.2287837	-1.755932289	0.51471854	-3.411441699	0.000646203	0.010490807
PDE1A	445.3662313	-2.000831527	0.586792227	-3.409778511	0.000650157	0.010535533
SORCS2	283.3424772	-2.654649876	0.778488724	-3.410004273	0.000649619	0.010535533
RGAG4	611.8412623	-1.695855268	0.497656138	-3.407684818	0.000655165	0.01060692
PASK	423.9233549	1.370724535	0.402439046	3.406042605	0.000659119	0.010658069
PCCB	1509.224173	1.478095593	0.433992103	3.405812186	0.000659675	0.010658069
TBX15	86.36728953	2.663576137	0.782112268	3.405618664	0.000660143	0.010658069
NUDT10	255.0923639	-2.02504977	0.594759563	-3.404820867	0.000662075	0.010679447
EPS8L2	3079.408843	1.55370219	0.456817276	3.401145865	0.00067104	0.010804237
FAM3D	468.1334474	-2.822415281	0.829813385	-3.401265069	0.000670748	0.010804237
BIRC5	673.5800545	2.437771164	0.717187671	3.399070092	0.000676154	0.010876612
IPO4	2463.263808	1.381201177	0.406426746	3.398401288	0.000677809	0.010890941
MEX3A	1409.444534	1.994372731	0.586889207	3.398209932	0.000678283	0.010890941
CCDC138	208.172667	1.678498923	0.49408138	3.397211452	0.000680763	0.010910832
CGREF1	187.7780455	2.341379541	0.689189699	3.397293293	0.00068056	0.010910832
MRPL12	1971.01762	1.434270543	0.422328003	3.396105711	0.00068352	0.010927747
NOXA1	528.8371659	1.668428989	0.491284097	3.396057391	0.00068364	0.010927747
S100A4	1729.339868	-1.197124865	0.352506102	-3.396040119	0.000683683	0.010927747
IQGAP3	682.3609452	2.395375669	0.705714584	3.394255587	0.000688154	0.010979247
PLEKHN1	108.7532171	1.939043536	0.571271575	3.39425874	0.000688146	0.010979247
BACH2	226.7296306	-2.414159156	0.711313407	-3.393945808	0.000688933	0.010981708
FGD5	1037.567644	-1.582798244	0.466425054	-3.393467463	0.000690138	0.010990941
MITF	4783.037967	-1.844640911	0.543786817	-3.392213371	0.000693304	0.011031381
PLK1	898.0989763	2.123284972	0.62602476	3.391694876	0.000694617	0.011040848
TGFBR2	6299.523622	-1.387418942	0.409089184	-3.391482824	0.000695155	0.011040848
KCNE4	669.6768806	-2.523639039	0.744410839	-3.390115923	0.000698631	0.011086034
TK1	704.3194921	2.038529205	0.601423254	3.389508456	0.00070018	0.011100607
C9orf116	750.2676675	2.197641886	0.648726174	3.387626358	0.000705002	0.011166983
SLC22A17	1105.823751	-2.13995194	0.631763815	-3.387265761	0.00070593	0.011171607
NDUFA4L2	332.5277694	-1.580767034	0.466750265	-3.386751228	0.000707255	0.011182514
AHCY	9159.047374	1.511993778	0.446797344	3.384070654	0.000714196	0.011282119
ITPR3	4826.712949	1.183029162	0.349657604	3.383393211	0.00071596	0.011299835
E2F1	282.9211026	2.43258501	0.719776052	3.379641492	0.000725804	0.011444926
PGD	5156.58257	1.239627506	0.366856849	3.379049648	0.000727369	0.011459316
LSP1	1837.446428	-1.527942021	0.452286901	-3.3782584	0.000729465	0.011482053
RRP12	1739.293076	1.201080916	0.355592127	3.377692654	0.000730967	0.011495409
SOCS2	2144.992449	-1.742796895	0.516308787	-3.375493383	0.000736835	0.011577325
RPS26	9356.703198	1.209138746	0.358315576	3.374507909	0.000739478	0.011608483
MAPK15	453.9864186	2.238265004	0.663357691	3.374144951	0.000740454	0.011613431
CEBPA-AS1	48.00600125	-2.488787538	0.737675647	-3.373823642	0.000741318	0.011615717
STXBP1	1329.548899	-1.723202071	0.510790263	-3.373600081	0.000741921	0.011615717
CLEC1A	177.1837243	-1.877188623	0.556482415	-3.373311668	0.000742698	0.011617546
GALNT16	192.5669104	-1.764324836	0.523122719	-3.372678672	0.000744408	0.011633935
TMEM255B	132.6993122	-1.700297842	0.504180796	-3.372397074	0.000745169	0.011635495
FANCA	330.9993711	1.780993451	0.528223661	3.371665417	0.000747152	0.011645761
LURAP1	45.14832295	-2.815890789	0.835111799	-3.371872835	0.000746589	0.011645761
FLJ35934	37.82059808	-2.872188158	0.85192809	-3.371397412	0.000747879	0.011646773
GCSAML	39.86597313	-2.97640003	0.882905278	-3.371143095	0.00074857	0.011647214
SGCA	214.6776434	-3.145778324	0.93349788	-3.369882664	0.000752002	0.011690273
ERC2	49.64855661	2.906752638	0.864649155	3.361771211	0.000774443	0.01202849
ANAPC1P1	26.66122337	-2.878101288	0.856563108	-3.360057491	0.000779263	0.012055527
ART5	44.39849362	-2.777653202	0.826849869	-3.359319878	0.000781346	0.012055527
DNA2	214.3773214	2.071056542	0.616309602	3.360415827	0.000778252	0.012055527
FCN1	204.9823531	-2.596494301	0.772875994	-3.359522512	0.000780773	0.012055527
HAGLROS	48.95444117	2.73780174	0.815037053	3.35911322	0.00078193	0.012055527
LOC100505666	61.2944361	2.197406313	0.654238966	3.358721241	0.00078304	0.012055527
MNX1	127.5085991	3.077717356	0.916331776	3.358736907	0.000782996	0.012055527
SFTA2	329.4775572	2.482312937	0.739051575	3.358781743	0.000782869	0.012055527
XRCC2	173.2908941	2.194303744	0.653290555	3.358848107	0.000782681	0.012055527
ZNF423	392.1209378	-1.398137905	0.416197432	-3.359314108	0.000781362	0.012055527
NOTCH4	670.068687	-1.506451517	0.449565644	-3.350904446	0.000805481	0.012390171
ADAMTS4	2168.963311	-2.924872885	0.873347467	-3.349036891	0.00081093	0.012463086
ANGPT4	16.57529018	-3.271115725	0.97719123	-3.347467338	0.000815536	0.012513051
EVPL	1102.181192	1.52224737	0.454749156	3.347444079	0.000815604	0.012513051
JUNB	23028.55232	-1.686939598	0.504294106	-3.345150336	0.00082238	0.012606
PPP1R3B	1594.484492	-1.299327578	0.388510532	-3.344381867	0.000824661	0.01261897
RAB31	4775.515907	-1.808047067	0.54061254	-3.344441601	0.000824484	0.01261897
MRGPRF	1737.28936	-2.368311695	0.708337851	-3.34347754	0.000827354	0.012638172
PHYHIPL	159.57285	1.95319272	0.584159466	3.343595084	0.000827003	0.012638172
LINC01123	154.5714689	2.024734063	0.605676983	3.342927206	0.000828996	0.01265227
FLI1	797.1489895	-1.623655169	0.485892128	-3.341595957	0.000832982	0.012702075
BEND3	423.2737626	1.492306415	0.44673375	3.340482814	0.000836329	0.012742053
KRT7	6527.644805	1.650228233	0.494065748	3.340098441	0.000837487	0.012748655
STARD8	366.2222063	-1.667938497	0.49947759	-3.339366033	0.000839698	0.012771261
EXO1	303.9961588	2.274416504	0.681700372	3.336387357	0.000848748	0.012891217
GRB7	722.6685175	1.590434315	0.476707751	3.336287926	0.000849052	0.012891217
NEK5	160.135711	1.960988502	0.587923456	3.335448658	0.000851619	0.012919035
LINC00858	41.45376757	2.876302224	0.862770054	3.333799326	0.000856684	0.012974345
LOC100130992	87.7067031	-2.458428637	0.73742954	-3.333781062	0.000856741	0.012974345
NR1D1	1157.173923	-1.361679091	0.408560642	-3.332868978	0.000859554	0.013005749
NUSAP1	908.6380067	1.905262787	0.571905562	3.331429019	0.000864013	0.013061979
FBXL7	1232.668502	-2.09619245	0.629619774	-3.329298944	0.000870649	0.013150988
TRAP1	6538.384403	1.724669632	0.518324821	3.327391553	0.000876631	0.01322998
CMA1	20.71409712	-3.114987581	0.93646155	-3.326337938	0.000879952	0.013268706
PER1	2500.766842	-1.526271329	0.458886213	-3.326034399	0.000880911	0.013271782
STRA6	2826.795149	-2.065470141	0.621091375	-3.325549545	0.000882444	0.013283504
BNC1	71.7005294	-3.034385294	0.912631248	-3.324875518	0.00088458	0.013304268
FANCI	785.042762	1.684255111	0.50668799	3.324047827	0.00088721	0.013332412
PLXNA4	543.2997374	-1.457146175	0.438473534	-3.323224921	0.000889831	0.013360388
FAM212A	55.51756193	-2.086701072	0.628060496	-3.32245235	0.000892299	0.013386009
GBP1P1	35.92655187	-2.428576513	0.731141333	-3.321623884	0.000894952	0.013414368
ADAMDEC1	230.6198679	2.425253786	0.730351163	3.320668067	0.000898023	0.013448923
NQO1	1296.132604	1.70795228	0.514501787	3.319623609	0.000901389	0.013487846
HCG4B	34.99215347	-2.744665793	0.827469612	-3.316938476	0.000910097	0.013606563
SHROOM3	3134.1311	1.712241437	0.516306001	3.316330691	0.000912078	0.013624606
CDK1	683.1366253	1.741137307	0.525095408	3.315849423	0.00091365	0.013636504
PARM1	3139.968563	-1.812196226	0.546663369	-3.315013093	0.000916388	0.013665767
APBB1	964.826777	-1.777849608	0.536469757	-3.313979183	0.000919784	0.013692821
EME1	102.5646685	2.055381403	0.620227885	3.313913244	0.00092	0.013692821
PSPH	540.6435402	1.439832581	0.434502521	3.313749662	0.000920539	0.013692821
TRIM10	51.7889732	2.607436068	0.787653368	3.310385219	0.000931677	0.013846777
ALDH1A1	3071.716556	-1.653790739	0.499914978	-3.308144007	0.000939165	0.013946283
EGFR	2267.08788	-1.252745847	0.378837586	-3.306815087	0.000943632	0.014000785
PINX1	673.1875257	1.437124278	0.434648185	3.3064081	0.000945003	0.014009317
CCDC136	129.3079774	-2.162990013	0.65453563	-3.304617677	0.00095106	0.014087232
CCDC65	444.0128663	2.067060764	0.625627043	3.303982441	0.000953218	0.014107306
LIFR-AS1	67.98664725	-2.051584154	0.621054634	-3.303387564	0.000955243	0.01412538
AMPH	419.8343128	-2.095083916	0.634428727	-3.302315656	0.000958901	0.01416756
ARHGAP11A	575.7793459	1.832999966	0.555276336	3.301059036	0.000963206	0.014183064
FOSB	22788.62905	-1.900371342	0.575724843	-3.300832622	0.000963984	0.014183064
LINC00473	17.50316764	-3.228233517	0.977758318	-3.30166817	0.000961117	0.014183064
PKD2	2669.563091	-1.668147227	0.505312691	-3.301217756	0.000962661	0.014183064
SPG20	2317.914766	-1.375685812	0.416713165	-3.301277539	0.000962456	0.014183064
EVC2	293.8263867	-2.164410669	0.655814647	-3.300339022	0.000965681	0.014196156
GLI3	836.490028	-1.788770626	0.542186099	-3.299182013	0.00096967	0.014242891
TIMM8B	1740.743728	1.174580566	0.356048405	3.298935057	0.000970524	0.014243528
CD83	1136.959178	-2.123866626	0.643974642	-3.298059409	0.000973555	0.014276105
MEDAG	1229.237085	-2.394654883	0.726287248	-3.297118171	0.000976824	0.014312099
CAB39L	540.5949227	-1.42023633	0.430796256	-3.296770363	0.000978034	0.014317901
GRASP	537.8478038	-1.960304305	0.594731837	-3.296114622	0.00098032	0.014328795
JAZF1-AS1	19.34574221	-2.825063266	0.857216853	-3.295622636	0.000982038	0.014328795
SLC25A10	1631.775862	1.781390713	0.540511103	3.295752306	0.000981585	0.014328795
TCF4	6507.962968	-1.620222947	0.491606741	-3.295770405	0.000981522	0.014328795
CCHE1	36.66979459	2.753511429	0.835575352	3.295347837	0.000982999	0.014330922
PCYT1B	157.9325737	2.104651807	0.638808841	3.294650405	0.000985442	0.014354631
FAM110B	386.9839337	-2.073871445	0.629562879	-3.294145056	0.000987215	0.01436856
PUS7	923.2305325	1.217481652	0.369667269	3.293452665	0.00098965	0.014380188
TUBB4B	8593.797702	1.551625847	0.471096548	3.293647244	0.000988965	0.014380188
EGR2	973.3388394	-1.703005482	0.517132702	-3.293169191	0.000990648	0.014382808
SYT13	276.0092538	2.73128266	0.82944434	3.2929065	0.000991574	0.014384374
DLL4	475.0642325	-1.599346324	0.485946174	-3.291200571	0.000997608	0.014459964
DCTPP1	1701.763193	1.443185849	0.438551994	3.290797601	0.000999038	0.014468764
MUC5AC	7863.119938	-3.053239452	0.928595372	-3.288019243	0.001008949	0.014600287
DNAJB13	695.2792501	2.200213027	0.669828872	3.284739012	0.001020769	0.014759175
PPP1R12B	6341.074094	-2.208527605	0.672602655	-3.283554694	0.001025068	0.014809151
COL26A1	79.8126223	2.172205521	0.661858117	3.281980632	0.001030807	0.014879841
PDE1B	99.664371	-2.369504148	0.722286991	-3.280557695	0.001036021	0.014942835
IL11RA	209.2724817	-1.773463246	0.540874247	-3.278882766	0.001042189	0.015019484
BOP1	1463.449374	1.597797696	0.48742878	3.278012628	0.001045407	0.015053521
ADAMTSL4	484.9349142	-1.671251785	0.510137633	-3.276080173	0.001052587	0.015144501
COL21A1	1236.915824	-1.633200428	0.498689526	-3.274984422	0.001056678	0.015175065
GPC3	96.96518566	-2.169824869	0.662625395	-3.27458755	0.001058163	0.015175065
PTGES	640.5367931	-2.398524596	0.732451396	-3.274653594	0.001057916	0.015175065
RBM24	417.5393201	-1.889623571	0.577015708	-3.274821718	0.001057287	0.015175065
TMEM204	824.8777113	-1.378287906	0.420996492	-3.273870287	0.001060853	0.015201236
TNFAIP3	5370.88019	-1.39800536	0.427352341	-3.271317894	0.001070475	0.015326623
PTPRD	628.9299737	-2.181171997	0.666838048	-3.270917136	0.001071993	0.01533587
AKAP1	2768.45569	1.29308122	0.395371055	3.270551053	0.001073382	0.015343249
IGF2BP2	708.4085135	-2.338393186	0.715231229	-3.269422659	0.001077672	0.015392062
TEPP	20.69780109	-2.922062676	0.894389551	-3.267102878	0.001086542	0.015506152
DPP6	1342.266363	-2.547017839	0.779902983	-3.265813692	0.0010915	0.015564282
RAB11FIP4	1448.230681	1.833706835	0.561669846	3.264741464	0.00109564	0.015610655
CLIP4	444.3744262	-1.38835544	0.425303913	-3.264384357	0.001097022	0.01561769
GHR	198.2423143	-2.316754821	0.709811218	-3.2639028	0.001098889	0.015631601
GLT1D1	85.05535648	-2.199872107	0.674359969	-3.262162951	0.001105656	0.015715148
PCDHGA2	121.4510001	-2.029713395	0.622408863	-3.261061201	0.001109961	0.015763595
ADIRF	1363.907781	-2.074986393	0.636338775	-3.260820295	0.001110904	0.01576426
EPAS1	7928.204784	-1.370329728	0.420305766	-3.260316269	0.00111288	0.015779568
AIM1	2872.311444	1.394977613	0.427956725	3.259623065	0.001115604	0.015794206
SLC45A1	108.9712082	-2.03255168	0.623559352	-3.259596178	0.001115709	0.015794206
P2RX1	125.4950866	-2.807974367	0.861576317	-3.259112758	0.001117612	0.015808416
KAT2B	966.7432914	-1.451795086	0.445649435	-3.257706554	0.001123165	0.015874184
FGF18	391.4450199	1.697340483	0.521261231	3.256218537	0.001129068	0.015919227
LOC728392	469.2941268	-1.854627183	0.569507918	-3.256543279	0.001127777	0.015919227
SELE	1104.825234	-2.862983154	0.879228448	-3.256244907	0.001128963	0.015919227
LMNB1	1744.713778	1.615166476	0.496163091	3.255313636	0.001132672	0.015944468
SCPEP1	1680.877103	-1.47459303	0.452979703	-3.255318107	0.001132654	0.015944468
CLMP	855.7298032	-2.017187246	0.619841037	-3.254362211	0.001136473	0.015950429
HES6	409.0191007	1.781300921	0.547308741	3.254654614	0.001135303	0.015950429
RHPN1	695.0148863	1.731050672	0.531919489	3.254347151	0.001136533	0.015950429
SYNPO	2720.13631	-1.782290007	0.547672424	-3.254299336	0.001136724	0.015950429
AURKB	382.3866789	2.297517103	0.706591577	3.251548954	0.00114778	0.016092719
MIR143HG	498.2488432	-2.297338498	0.706650644	-3.251024417	0.0011499	0.016096766
PDGFRA	9437.546325	-1.930420712	0.593749936	-3.251235236	0.001149047	0.016096766
METRNL	602.4129152	-1.350699004	0.41591963	-3.247500015	0.001164237	0.016284493
FOS	36993.54459	-1.235874676	0.380732349	-3.24604589	0.0011702	0.01635489
PABPC5	91.19208325	-2.602687281	0.801962968	-3.245395843	0.001172875	0.016379255
RNASEH2A	569.9292174	1.650643487	0.508684505	3.244925823	0.001174812	0.016393292
PUS1	836.7943409	1.357812855	0.418547568	3.244106428	0.001178197	0.016427488
CLSPN	348.1413624	1.973378332	0.608448763	3.243294178	0.001181561	0.016461342
LOC389906	1014.500576	1.434207265	0.442274684	3.242797556	0.001183623	0.016463969
PAEP	121.3065023	-2.812772911	0.867364901	-3.24289455	0.00118322	0.016463969
MAP7D3	728.2678255	-1.25647894	0.387517829	-3.242377112	0.001185371	0.016475245
KISS1R	64.48752985	3.099389676	0.955975017	3.242124137	0.001186423	0.016476852
MCCC2	5633.390384	1.594762929	0.492034179	3.241162902	0.001190431	0.016506439
ZNF835	67.98604269	-2.313394164	0.713721278	-3.241313149	0.001189804	0.016506439
NEXN	953.5750613	-2.367852878	0.731208104	-3.238274937	0.001202549	0.016661316
BCAM	3416.510283	-1.134892325	0.350526965	-3.237674806	0.001205081	0.016682911
IGFBP7	18259.83652	-1.508419314	0.465927343	-3.23745609	0.001206005	0.016682911
MRPL15	1135.848885	1.183585619	0.365618094	3.237218396	0.00120701	0.016683687
LHFP	1312.900322	-1.684479527	0.520452839	-3.23656516	0.001209776	0.016708784
SCGB1D4	2556.433355	2.355616857	0.727989138	3.235785722	0.001213084	0.016741322
FRMD3	231.5136956	-1.513618724	0.46792745	-3.234729498	0.00121758	0.016790193
PRLR	2877.035909	-1.387411431	0.429108735	-3.23323978	0.001223948	0.016864774
NDC1	1314.922459	1.339525342	0.414331608	3.232978893	0.001225066	0.016866964
TPTEP1	101.0519991	-2.307486486	0.714006006	-3.231746605	0.001230361	0.016926611
C1QTNF7	640.4571968	-2.176086511	0.673487125	-3.231073661	0.001233262	0.016926779
MFSD3	497.9117649	1.604645438	0.496565593	3.231487364	0.001231478	0.016926779
MTL5	248.925962	2.506176662	0.775635722	3.231125891	0.001233036	0.016926779
IGFBP6	1757.426001	-2.490953055	0.771349305	-3.229345043	0.001240741	0.017016153
DCDC2	978.7152204	1.914943986	0.593114671	3.228623534	0.001243875	0.017045841
FAM136A	1924.275812	1.238458249	0.383635806	3.228213395	0.00124566	0.017046571
SMAD3	2130.962653	-1.135958126	0.351889652	-3.228165757	0.001245868	0.017046571
MCIDAS	100.2619541	2.833352839	0.877864567	3.227551204	0.001248547	0.017056684
RANGAP1	2846.946693	1.270682473	0.393691446	3.227610064	0.00124829	0.017056684
PCDHB4	286.6445706	-1.997676237	0.61901342	-3.227193743	0.001250108	0.017064748
CLEC4G	17.50115189	-3.108012822	0.963546167	-3.225598241	0.001257097	0.01714684
SMARCA4	8078.208449	1.310600029	0.40636097	3.225211388	0.001258797	0.017156718
IGFN1	272.4516997	-2.69276881	0.835091134	-3.224520895	0.001261836	0.017184825
CCDC51	390.3691284	1.400659417	0.434580236	3.223016835	0.001268481	0.017250471
TIGIT	58.71979923	-2.14428134	0.66530899	-3.222985669	0.001268619	0.017250471
DNPH1	1237.601994	1.382295849	0.429029267	3.221915047	0.001273369	0.017293019
MTHFD1L	1108.479188	1.181720574	0.366806455	3.221646067	0.001274565	0.017293019
ODC1	4549.551517	1.463772872	0.454359828	3.221615956	0.001274699	0.017293019
CYP46A1	20.8754283	-2.770061484	0.859992235	-3.221030809	0.001277304	0.017301665
HSPD1	7496.498127	1.193155658	0.370406048	3.221209983	0.001276506	0.017301665
FAM195A	449.4049503	1.744936297	0.54196568	3.219643533	0.001283501	0.017372219
RCAN3	897.0901388	1.308251546	0.406566839	3.2178019	0.00129177	0.017470693
SERTAD1	854.4562609	-1.422754879	0.442379761	-3.216139174	0.001299278	0.017545243
TPSD1	20.19012922	-3.079942813	0.957601909	-3.216308138	0.001298513	0.017545243
FRMD6	2199.703969	-2.31824433	0.721055398	-3.215071041	0.001304122	0.017597146
FGFR4	160.2949389	1.932433229	0.601193268	3.214329453	0.001307496	0.017629132
ANG	257.2342593	-1.453006447	0.452344003	-3.212171351	0.001317358	0.017747418
POU5F1B	78.76524084	2.300460353	0.716215057	3.211968708	0.001318287	0.017747418
FAM83H	2453.320729	1.611808699	0.502120147	3.210006031	0.001327322	0.017855373
ARHGAP23	1596.165941	-1.541006006	0.48015199	-3.209412929	0.001330063	0.017875285
HGF	281.214608	-2.435398774	0.75886944	-3.209246078	0.001330835	0.017875285
CDCA5	432.1897439	2.276693805	0.7095156	3.208800207	0.001332901	0.01788936
DNMT3B	389.5994918	1.620514275	0.505235866	3.207441088	0.001339215	0.017960393
PNMA5	62.10519647	2.917274081	0.910658481	3.20347764	0.001357786	0.018195572
HELLS	265.9712137	1.635064557	0.510474655	3.203027891	0.001359908	0.018196274
SLC37A1	1515.969974	1.236216569	0.385934454	3.203177524	0.001359202	0.018196274
ATP6V1G2	51.66164737	-2.098139813	0.655349954	-3.20155636	0.001366873	0.018261677
GEN1	565.196718	1.235514529	0.385905693	3.201597056	0.00136668	0.018261677
HK2	1732.938267	1.30121001	0.406611412	3.20013155	0.001373649	0.018324349
KL	111.4032124	-2.101000612	0.656522014	-3.200198267	0.001373331	0.018324349
CARD11	329.5968171	-2.233324382	0.697981662	-3.199689195	0.001375759	0.01833858
RPS2	91503.09102	1.367146268	0.427433578	3.198499928	0.001381446	0.018400438
IL6	551.2946828	-2.296108779	0.717988213	-3.197975591	0.00138396	0.018414585
SLC29A2	694.2258689	1.871510134	0.58524164	3.197841721	0.001384603	0.018414585
NR2F2-AS1	160.9014881	-1.993846219	0.623617528	-3.197226071	0.001387561	0.018439987
PDCD1	33.75777711	-2.657753319	0.831470922	-3.196447704	0.00139131	0.018475846
WNK3	114.5227791	-1.672991455	0.523602595	-3.195155009	0.001397558	0.018544798
NHP2	3374.112377	1.265340324	0.396144969	3.194134533	0.001402507	0.018584561
VDAC1	7329.689466	1.204784571	0.377190453	3.194101442	0.001402668	0.018584561
CENPH	281.4201004	1.650094292	0.5166542	3.193807948	0.001404095	0.018589456
DSC2	1512.50328	1.379037442	0.431945889	3.192616199	0.001409902	0.018652293
NCALD	1797.906116	1.198103806	0.375368839	3.191804115	0.001413872	0.018690748
CYP2J2	330.8603445	2.005788087	0.628795677	3.189888478	0.001423277	0.018730582
LYPLA1	2496.186653	1.311865477	0.411241679	3.190010996	0.001422674	0.018730582
MAP6	505.8835253	-1.378712929	0.43215346	-3.190331805	0.001421095	0.018730582
NEURL1	104.0656232	-2.650442681	0.830800597	-3.190227222	0.00142161	0.018730582
NLGN3	114.5915091	-1.989394497	0.623618085	-3.190084677	0.001422311	0.018730582
TTLL12	3468.168003	1.449263963	0.454209185	3.190741208	0.001419083	0.018730582
ARID5B	7487.234586	-1.379078248	0.432674447	-3.187334627	0.001435905	0.018868527
VSIG4	587.2395742	-1.277931713	0.400927173	-3.187441009	0.001435377	0.018868527
ISLR2	225.6774809	-2.017279487	0.633381903	-3.184933886	0.001447871	0.01901155
CCT2	5154.879239	1.092280047	0.34313597	3.183228053	0.001456429	0.019095396
PRR16	500.1458818	-1.48043553	0.465045283	-3.18342231	0.001455452	0.019095396
NEDD4	786.1171371	-1.467235554	0.46107973	-3.182173188	0.001461744	0.019139295
TONSL	476.0536682	1.757451553	0.552287519	3.182131574	0.001461954	0.019139295
KLHDC8B	490.5274438	-1.257624861	0.395247265	-3.181868601	0.001463282	0.019142427
FAT4	1136.782562	-2.131500331	0.670148307	-3.180639729	0.001469503	0.019171991
LRRC4C	113.1192489	-2.532730073	0.79619832	-3.181029157	0.001467529	0.019171991
MAGEH1	645.4430032	-1.938098408	0.609405075	-3.180312222	0.001471165	0.019171991
NOP2	1433.698834	1.175547347	0.369604912	3.180551199	0.001469952	0.019171991
NR1D2	2337.195625	-1.277245081	0.401632838	-3.180131101	0.001472084	0.019171991
RUFY3	1838.56744	-1.415233249	0.444923223	-3.180848236	0.001468445	0.019171991
S1PR2	694.2007791	-1.271804352	0.399978615	-3.179680874	0.001474373	0.019187587
LRRC26	264.803725	1.601117097	0.503648335	3.179037802	0.001477648	0.019215984
AMMECR1	1289.915623	1.439403617	0.45289341	3.178239265	0.001481724	0.019254749
FIBIN	343.9425728	-2.624965381	0.826002303	-3.177915329	0.001483381	0.019262037
SDCCAG3	1122.766265	1.256572062	0.395443633	3.177626235	0.00148486	0.019267022
HLA-E	17778.85325	-1.243671058	0.391565714	-3.17614902	0.001492443	0.019351126
KLF10	5353.901421	-1.3154208	0.414199648	-3.175813415	0.00149417	0.019359249
CSF1R	1809.678833	-1.255820537	0.395495664	-3.175307975	0.001496776	0.019378724
SYPL2	96.66720332	-2.063768488	0.650011998	-3.174969838	0.001498521	0.019387044
MOB3C	583.7097111	-1.327099332	0.418067877	-3.174363314	0.001501656	0.01941332
GAS1	1494.776386	-1.270909355	0.400440508	-3.173778199	0.001504686	0.019438203
SMIM24	166.0501701	1.878666027	0.592080457	3.172991109	0.001508771	0.019476666
MDFIC	1058.823273	-1.986801578	0.626319199	-3.172186929	0.001512956	0.019516354
LCNL1	21.07544232	-2.723096498	0.858706556	-3.171160718	0.001518311	0.019571075
KIF18A	153.7273212	1.707095657	0.538413416	3.170603862	0.001521224	0.019594262
F8	610.553664	-1.960126146	0.618386686	-3.169741829	0.001525744	0.019609384
NDRG2	3770.560664	-1.70470085	0.537782503	-3.169870422	0.001525069	0.019609384
TENM2	65.9872435	-2.516071014	0.793736766	-3.169906097	0.001524882	0.019609384
EXOSC5	714.9841334	1.380174814	0.435698321	3.167730391	0.001536339	0.01973113
ZSCAN12	265.753587	-1.594190362	0.503384682	-3.166942539	0.001540508	0.019770222
RAN	8959.106444	1.155340841	0.364876093	3.166392275	0.001543425	0.019793216
RAB8B	976.4874098	-1.703857118	0.538181814	-3.165950748	0.00154577	0.019808835
GEM	9046.215362	-2.479571659	0.783261845	-3.165699537	0.001547105	0.019811509
CD93	3688.875495	-1.714627236	0.542014297	-3.163435438	0.001559189	0.019922723
PLEKHH2	1445.15612	-2.012832634	0.63626325	-3.163521758	0.001558727	0.019922723
SCN2A	70.05922945	-2.479187329	0.783607969	-3.163810765	0.00155718	0.019922723
PCDHGB7	316.2973819	-1.58343609	0.500656558	-3.162719164	0.00156303	0.019957298
DUSP15	90.07438273	-2.211927116	0.699425065	-3.162493348	0.001564243	0.019958289
POLQ	245.9945149	1.943892347	0.615279498	3.159364731	0.001581135	0.020159182
LIN7A	106.4520139	-2.241912918	0.709969319	-3.157760282	0.001589862	0.020245571
PPAP2A	1555.222235	-1.775726431	0.562348777	-3.157695903	0.001590213	0.020245571
EPN3	632.3039049	1.890608241	0.59910506	3.155720705	0.001601021	0.020368415
PCDHB6	85.58418973	-1.814040733	0.574934967	-3.155210305	0.001603825	0.02038933
MT1F	662.1072445	1.818169838	0.576347522	3.154641549	0.001606954	0.020414354
GJA4	499.9578852	-1.850943316	0.58685475	-3.154005854	0.001610459	0.020444103
PTRH1	541.3584217	1.270942449	0.403167456	3.152393454	0.001619379	0.020542513
LOC389033	70.52609885	-2.078576871	0.659450437	-3.151983462	0.001621655	0.020556547
TFB1M	411.1981938	1.286908085	0.4083356	3.151594143	0.001623818	0.020569142
KIF20A	707.0350975	2.129606518	0.67580477	3.151215575	0.001625924	0.020580995
LMCD1	984.292866	-1.675194992	0.531667888	-3.150829739	0.001628074	0.020593375
FOXN3	3758.333169	-1.336264356	0.424140758	-3.15052098	0.001629796	0.020600334
HS6ST3	220.3903316	-2.241554727	0.711665964	-3.149728722	0.001634221	0.020641436
GPR137B	1107.946907	-1.288742519	0.409639409	-3.146041349	0.001654966	0.020873467
STK17B	1322.8543	-1.88623029	0.599529622	-3.146183643	0.001654161	0.020873467
ELN	1507.298692	-1.625421139	0.516859699	-3.144801467	0.001661996	0.020947103
COL15A1	5347.674167	-2.150191775	0.684246918	-3.14242084	0.00167557	0.021103062
NLGN2	1845.087149	-1.836769533	0.584656965	-3.141619175	0.001680164	0.021145774
KIF14	155.3331277	2.166542667	0.689874311	3.140488972	0.001686661	0.021197188
TRPM3	32.4848322	-2.785013629	0.88677981	-3.140592058	0.001686067	0.021197188
ZAK	5556.372553	-1.624628295	0.517526532	-3.139217405	0.001693997	0.021274185
RAPGEF3	550.7009648	-1.891020047	0.602547967	-3.13837263	0.001698888	0.021320371
CTSO	1493.207346	-1.322896107	0.421642841	-3.137480298	0.001704067	0.021370122
KCNAB1	286.3104126	-2.000427592	0.637771281	-3.136590895	0.001709244	0.021419769
CEP85L	505.53462	-1.357532972	0.433006674	-3.135131754	0.001717769	0.021511269
LAPTM4B	8762.28271	1.121978703	0.35804864	3.133592978	0.001726802	0.021608991
RGS9	30.62822034	-2.322114622	0.741093109	-3.133364208	0.001728149	0.021610461
ANKS4B	44.48495833	2.824358977	0.901578472	3.132682362	0.001732168	0.021629098
PAX8-AS1	747.8410619	1.169011677	0.373189805	3.132485569	0.001733329	0.021629098
TP63	274.7543354	-2.640815229	0.842939699	-3.132863753	0.001731098	0.021629098
RGS13	20.46281627	-2.966362368	0.947160004	-3.131849271	0.00173709	0.021660654
CITED4	2851.477971	1.473463861	0.470670338	3.13056452	0.001744707	0.021740208
E2F5	394.9448362	1.487917376	0.475920847	3.126396725	0.001769626	0.022021095
TARS	3597.626176	1.086301559	0.347463548	3.126375602	0.001769754	0.022021095
CST6	61.85801232	2.227394647	0.712905576	3.124389432	0.001781745	0.022135299
DANCR	3455.510367	1.473280267	0.471565744	3.124230894	0.001782705	0.022135299
ESPL1	322.0567436	2.190374193	0.701092422	3.124230305	0.001782709	0.022135299
AIMP2	578.2300032	1.386397963	0.443920071	3.123080149	0.00178969	0.022175004
CACNB2	378.3287521	-1.982136639	0.634646634	-3.123213032	0.001788882	0.022175004
USP18	335.7976969	1.289604797	0.412881845	3.123423357	0.001787604	0.022175004
GAS7	1792.962364	-1.625321215	0.520955566	-3.119884536	0.001809219	0.022401194
GTF3C6	1914.068467	1.139771011	0.365444919	3.118858548	0.001815531	0.022452157
STARD13	1428.849109	-1.504198795	0.482300439	-3.118800384	0.001815889	0.022452157
TMEM102	463.0991587	1.510473663	0.484367443	3.118445889	0.001818075	0.022463386
MIR22HG	876.8013047	-1.812128874	0.581428154	-3.116685805	0.001828964	0.022582052
C15orf26	167.5113714	2.625317849	0.842528989	3.115997058	0.001833241	0.022618978
FDXR	427.118811	1.690401611	0.542694304	3.114832048	0.001840497	0.022692576
EBNA1BP2	2061.730573	1.189795537	0.382056837	3.11418465	0.00184454	0.022726493
MARS2	341.7999343	1.382034563	0.443829756	3.113884419	0.001846418	0.022733699
MOB3B	1259.913969	-1.422952062	0.457065533	-3.113234228	0.001850491	0.022767902
CLK4	1241.913338	-1.263976701	0.40605768	-3.112800876	0.00185321	0.022785412
ARHGAP31	1295.642203	-1.488230369	0.478219557	-3.112023226	0.001858099	0.022797692
FCGBP	14027.81739	-2.821755619	0.90668139	-3.112179923	0.001857113	0.022797692
RAB30	733.9915389	-1.405225927	0.451521264	-3.11220321	0.001856966	0.022797692
PXK	1290.344792	-1.270044047	0.408175407	-3.111515353	0.001861298	0.022821019
PKMYT1	241.2901627	2.555506769	0.82181255	3.109598128	0.00187342	0.022953643
CPS1	87.15709321	-1.804568326	0.580494097	-3.108676447	0.001879274	0.022993316
MEF2D	3539.684625	-1.515210447	0.48739267	-3.108808441	0.001878435	0.022993316
GTSE1	451.1913691	2.164188123	0.696222892	3.108470215	0.001880586	0.022993368
TSTA3	2449.652732	1.330985039	0.428584726	3.105535401	0.001899349	0.023206637
EDARADD	92.48673486	-1.820159503	0.586345928	-3.10424174	0.001907674	0.023292169
TPI1	19030.00036	1.258126634	0.405358393	3.10373895	0.001910919	0.023315593
C2orf74	94.61323343	-2.160993114	0.69659584	-3.102219377	0.001920756	0.023419365
RAB23	1870.957368	-1.630498115	0.525766404	-3.101183533	0.001927488	0.023485163
EDN2	151.0663032	1.991180031	0.642222328	3.100452823	0.00193225	0.023521737
TMEM238	184.5594525	1.758712051	0.567269269	3.100312581	0.001933165	0.023521737
PCDH9	43.04755482	-2.288816749	0.738331687	-3.099984449	0.001935308	0.023531525
PRKCZ	595.0740436	1.241379997	0.401167809	3.094415775	0.001972009	0.023961206
NPM3	746.5097786	1.529893478	0.494505332	3.093785608	0.001976202	0.023995573
ZBTB4	4943.348755	-1.3152961	0.425183674	-3.093477431	0.001978256	0.024003932
ENDOD1	1589.856779	-1.138368075	0.368234356	-3.091422773	0.001991998	0.024154005
CDH23	92.98755444	-1.793815486	0.580302353	-3.091173897	0.001993668	0.0241576
FAM86B1	350.2409659	1.594168159	0.516340206	3.087437585	0.002018902	0.024446507
RUVBL2	4047.066301	1.367565533	0.443022893	3.086895859	0.002022584	0.024474246
TMEM55A	246.6049835	-2.110096901	0.683925948	-3.085271009	0.002033668	0.024591433
FOXN4	144.4019573	2.444650546	0.792503134	3.08472035	0.002037436	0.024620072
GAL	95.26358295	2.807654198	0.910326493	3.084227714	0.002040813	0.024643941
RAC2	770.0399215	-1.502726583	0.48770462	-3.081222776	0.002061523	0.024876943
GART	3350.839796	1.153270227	0.374681196	3.078004022	0.002083921	0.025129972
DTNA	519.8096771	-1.773611748	0.576431676	-3.076881134	0.002091787	0.025207538
CTNNA3	39.53096352	-2.82387058	0.91799097	-3.076142001	0.00209698	0.025235519
LRCH1	1650.580819	-1.221634547	0.397109516	-3.076316473	0.002095753	0.025235519
VASN	1165.514385	-1.472576822	0.479191342	-3.073045549	0.002118861	0.02548141
C12orf56	55.48670629	2.624855028	0.85429745	3.072530567	0.002122521	0.025507972
ATAD3C	122.1574447	-1.828904241	0.595464476	-3.071391013	0.002130639	0.025588047
PCSK1	87.17809238	-1.993612891	0.649159751	-3.071066696	0.002132955	0.025598372
LDHA	25971.85459	1.089005554	0.354658113	3.070578434	0.002136446	0.025622774
FAM131B	301.9789664	-1.947912572	0.634512664	-3.0699349	0.002141054	0.025660544
RANBP17	562.4040055	1.940186411	0.632251559	3.068693754	0.002149969	0.025732008
SYTL5	219.7409202	-1.594297318	0.519569995	-3.068493815	0.002151408	0.025732008
YPEL3	1331.411638	-1.124026034	0.366281674	-3.068747672	0.002149581	0.025732008
CACHD1	1572.394214	-1.438550891	0.469093872	-3.066658883	0.002164657	0.025857488
DACT3	558.2788772	-2.243549333	0.731720752	-3.066127791	0.002168506	0.025857488
NOVA2	80.63488762	-1.791485002	0.58428022	-3.066140084	0.002168417	0.025857488
PTCH1	2191.16061	-1.257996311	0.410247158	-3.066435165	0.002166278	0.025857488
SYTL4	1095.202906	-1.888870462	0.616064942	-3.066024915	0.002169252	0.025857488
NPW	300.3173642	2.135487189	0.696836548	3.06454533	0.002180011	0.025961732
TNFSF12	367.1183744	-1.359012542	0.443481677	-3.064416442	0.002180951	0.025961732
RAB36	947.6360093	1.484692511	0.484673385	3.063284587	0.002189218	0.026042506
IL15	111.041662	-1.688029058	0.551518682	-3.060692436	0.002208258	0.026251246
BEGAIN	45.75786915	-2.222245541	0.726120259	-3.060437321	0.00221014	0.026255868
KLHL1	24.30487059	2.972084641	0.971345965	3.059759084	0.002215151	0.026297627
FAM20A	1824.905475	-2.001476733	0.654262557	-3.059133846	0.00221978	0.026334793
HPGDS	114.1256072	-2.667073996	0.872026283	-3.058478909	0.002224637	0.026374629
ISM2	15.50116313	-2.933704307	0.960283396	-3.055040125	0.002250304	0.026655655
SGK2	164.8161352	2.413370764	0.790000532	3.054897643	0.002251373	0.026655655
C16orf54	185.3574423	-2.345281499	0.767864867	-3.054289368	0.002255944	0.026681509
ZNF593	599.9016611	1.233110152	0.403742021	3.05420315	0.002256592	0.026681509
PGM5-AS1	129.7855821	-2.844611758	0.931606824	-3.053446674	0.002262289	0.026712941
RBMS1	3843.651127	-1.369977476	0.448655879	-3.053515042	0.002261774	0.026712941
SMIM10	290.059499	-1.454059398	0.476321181	-3.052686835	0.002268025	0.026762694
TCEAL3	1570.160535	-1.601302916	0.524866139	-3.050878682	0.002281727	0.026906326
POF1B	468.9638892	2.105535303	0.690461621	3.049460303	0.002292529	0.026997488
RSPO3	1065.317929	-2.692945319	0.883080629	-3.049489741	0.002292305	0.026997488
BMPR1B-AS1	191.5185543	1.963023254	0.643799304	3.049122983	0.002295105	0.02700973
SLC25A39	4235.289067	1.468852558	0.481790173	3.048739141	0.002298039	0.027026172
NOB1	3351.175188	1.255205421	0.411870167	3.04757548	0.002306956	0.027094788
SEMA6C	324.6083214	-1.408115833	0.462033855	-3.04764644	0.002306411	0.027094788
PCP4L1	149.0336028	-2.419550055	0.794160663	-3.046675778	0.002313871	0.027157869
LINC00312	108.643065	-2.009630689	0.659673155	-3.04640362	0.002315967	0.027164332
GJA1	12936.10534	-1.394985134	0.458013254	-3.045730929	0.002321155	0.027170798
PKHD1	140.8385717	2.351556598	0.772041169	3.045895337	0.002319886	0.027170798
STAP2	1227.110799	1.583101195	0.519718399	3.046074946	0.0023185	0.027170798
C17orf107	93.32859507	-1.933767634	0.634991393	-3.045344639	0.002324138	0.027180688
SH2D3C	435.2739037	-1.257072022	0.412801528	-3.045221343	0.002325091	0.027180688
RCBTB2	809.6938511	-1.640301114	0.538692282	-3.044968656	0.002327046	0.027185459
STON1	1105.240744	-2.087500139	0.685868282	-3.043587513	0.002337754	0.027292428
PLEKHO2	1534.238864	-1.331109811	0.437451176	-3.042876287	0.002343286	0.02733886
CDH13	2760.401187	-2.360706369	0.776330828	-3.040850991	0.002359105	0.027468737
KIFC1	507.9500698	2.197178585	0.722515698	3.041011551	0.002357848	0.027468737
LRRN4CL	813.5643445	-2.172328219	0.714362156	-3.04093407	0.002358455	0.027468737
DAB2	4171.145983	-1.373596075	0.451757007	-3.04056396	0.002361355	0.027476737
MTCH2	3060.055556	1.072620942	0.352831937	3.0400336	0.002365518	0.027506964
SLC5A7	14.86374229	-2.983676142	0.981597665	-3.039612101	0.00236883	0.027527279
NOP16	919.8153291	1.236187168	0.406908122	3.038000722	0.002381534	0.027656623
FAM86C1	230.7246229	1.386234592	0.45640204	3.037310245	0.002386996	0.027688715
ZBED2	253.0774636	2.08199726	0.685486856	3.037253366	0.002387447	0.027688715
TRPM4	2573.630928	1.262022555	0.415559134	3.036926524	0.002390037	0.027700482
SETBP1	1731.299963	-1.349884336	0.444625831	-3.036000705	0.002397388	0.027767376
CTSW	122.1200583	-1.638395052	0.539699168	-3.035756122	0.002399333	0.027771614
PLEKHG4B	651.5860126	1.659999655	0.547053193	3.034439202	0.002409833	0.027874795
NMUR2	36.07710705	2.362107438	0.778626685	3.033684157	0.002415872	0.027907926
SHTN1	1921.231013	1.334686891	0.439947071	3.033744237	0.002415391	0.027907926
DECR2	481.5651206	1.260718206	0.415690121	3.032831776	0.002422706	0.027968496
NUDT19	694.2807753	1.422307939	0.469037569	3.032396623	0.002426202	0.027990473
PTGFR	184.6392702	-2.305510338	0.76050681	-3.031544634	0.002433059	0.028032799
TUBG2	527.7025175	-1.276856605	0.421174923	-3.031653916	0.002432179	0.028032799
PNPO	1746.950394	1.459148536	0.481451647	3.030727062	0.002439657	0.028077645
SLC7A1	4799.973387	1.08649876	0.358501585	3.030666543	0.002440146	0.028077645
RIPK2	1315.350192	1.08088735	0.356693807	3.030294693	0.002443152	0.028093854
ACHE	44.04841253	-2.368510707	0.781792755	-3.02958897	0.002448868	0.02811803
IQCA1	141.8234844	-1.635409923	0.53986279	-3.029306618	0.002451158	0.02811803
PJA2	4549.040122	-1.270617651	0.419442106	-3.029304001	0.002451179	0.02811803
SLCO2B1	1208.977428	-1.186871365	0.391804253	-3.029245743	0.002451652	0.02811803
MARCKSL1	7058.066247	1.155291391	0.381473517	3.028496971	0.002457735	0.028169429
ARHGEF40	1605.208385	-1.45663129	0.481176212	-3.027230467	0.002468057	0.028259204
HNF1B	752.2542727	1.646697302	0.543977624	3.027141615	0.002468783	0.028259204
ZFP36	38378.38423	-1.686842035	0.557376464	-3.026396238	0.002474877	0.028310537
EIF5A	14146.48281	1.220413505	0.403397828	3.025334842	0.00248358	0.028391615
EPB41L3	1020.351634	-1.50545139	0.497890707	-3.023658342	0.002497383	0.028530856
NR2F2	10996.24819	-1.35156511	0.447044012	-3.023337909	0.002500029	0.028542541
FAM111B	223.1113898	1.972607885	0.652836175	3.021597085	0.00251445	0.028688552
FZD4	907.544189	-1.316055502	0.435670551	-3.020758458	0.002521424	0.028749468
RBBP8NL	145.3305666	1.829565236	0.605722302	3.020468671	0.002523838	0.028758343
CCDC34	673.2584961	1.301938178	0.43113763	3.019773938	0.002529634	0.028805718
PRR11	818.9877703	1.909724822	0.632559506	3.019043747	0.002535739	0.028856547
C14orf28	294.6230927	-1.333056843	0.441752006	-3.017658835	0.002547355	0.028951258
WSB1	3997.241797	-1.137749092	0.377021813	-3.0177275	0.002546778	0.028951258
ANKRD1	202.5757478	2.316921159	0.768077813	3.016518797	0.002556954	0.029041576
CDIP1	617.9442458	-1.561309996	0.517704622	-3.015831672	0.002562755	0.029088674
LINC01589	42.79429841	-2.333405043	0.774016723	-3.014670061	0.002572589	0.029181463
PCBD1	3171.351119	1.38520694	0.459605761	3.013902477	0.002579107	0.029217692
SMCO3	22.70683601	-2.650800698	0.87951615	-3.013930667	0.002578867	0.029217692
CCDC81	88.91157361	-1.883262597	0.62535924	-3.0114892	0.002599697	0.029431979
DOK2	159.834248	-1.436891816	0.477234139	-3.010873902	0.00260497	0.029472705
HR	308.1914619	1.830659376	0.60809722	3.010471542	0.002608424	0.029492803
RAET1L	22.03997141	2.852737316	0.947682203	3.010225694	0.002610536	0.029497718
ZNF385D	112.3896738	-1.988243213	0.660685067	-3.009366052	0.002617935	0.029562319
FLAD1	1580.719534	1.213002216	0.403148033	3.008825834	0.002622594	0.029570429
HRASLS	43.5292098	2.164211723	0.719306215	3.008748815	0.002623259	0.029570429
SLC27A5	382.6171955	1.483441217	0.493050902	3.008697904	0.002623699	0.029570429
SST	100.6586254	-2.689238547	0.893881245	-3.008496446	0.002625439	0.029571085
ADAM21	14.62773275	2.838008877	0.943470502	3.008052578	0.002629276	0.029595351
KRTAP5-AS1	57.01013433	2.10004261	0.698260013	3.007536691	0.002633743	0.02960772
PKDCC	1668.169587	-1.65960923	0.551796507	-3.007647222	0.002632786	0.02960772
PCDHA6	29.24617997	-2.509133346	0.834338718	-3.007331783	0.002635519	0.029608756
APH1B	556.6053939	-1.255982311	0.417721672	-3.006744429	0.002640617	0.029628157
SCGB1A1	41.61593812	2.825376491	0.939653278	3.006828748	0.002639884	0.029628157
GLIS2	882.4589617	-1.407097299	0.468277301	-3.004837724	0.002657226	0.0297955
GABRE	784.8311377	-2.116397042	0.70459373	-3.003712567	0.002667072	0.029886841
CLEC9A	19.08733248	-2.881810446	0.959538409	-3.003329954	0.002670427	0.029905385
ENPP1	1310.051367	-1.99246116	0.6637616	-3.001772262	0.002684129	0.030020102
SLC2A3	5143.883617	-2.173903537	0.724252221	-3.001583527	0.002685793	0.030020102
UBL3	2232.960449	-1.171785167	0.390378279	-3.001665894	0.002685067	0.030020102
GPI	13476.27294	1.222474669	0.407435623	3.000411845	0.002696148	0.030106109
MRPS12	1101.885303	1.266047172	0.421969949	3.000325441	0.002696913	0.030106109
MIR205HG	212.9787913	-2.631622423	0.877309365	-2.999651582	0.002702886	0.030153643
KCNIP1	80.46022694	-2.24553432	0.748682208	-2.999315726	0.002705867	0.030155177
SLC7A3	74.75573389	-2.749477881	0.916721891	-2.999249727	0.002706454	0.030155177
GOLGA2P7	252.8472362	1.40853818	0.469708879	2.998747186	0.002710922	0.030181553
RACGAP1	1017.203414	1.547217459	0.515980386	2.998597427	0.002712254	0.030181553
RASAL1	533.705222	1.886898197	0.629313619	2.998343181	0.002714518	0.03018764
MCM2	1339.391387	1.657078917	0.552967592	2.996701691	0.002729176	0.030318473
NBEAL2	2309.908256	1.338074192	0.446548781	2.996479332	0.002731168	0.030318473
SYT9	67.65760127	-2.492916449	0.831957433	-2.996447113	0.002731456	0.030318473
OPTN	2314.814884	-1.153150635	0.385017314	-2.995061759	0.002743893	0.030437302
LHX1	135.0954638	-2.859121854	0.95499792	-2.993851393	0.002754801	0.030539034
CAND2	231.2356194	-1.7126808	0.572233951	-2.99297306	0.002762741	0.030607762
FAM184A	81.29963935	-2.557076647	0.854741368	-2.991637872	0.002774852	0.030670761
KIF18B	232.3598677	2.080058262	0.695304944	2.991576976	0.002775406	0.030670761
NCAPG	318.8516233	1.943671735	0.649597916	2.992115104	0.002770518	0.030670761
SV2A	616.4984826	-1.989357184	0.664983679	-2.991587983	0.002775306	0.030670761
DOK5	80.47501461	-2.424797706	0.810629637	-2.991252226	0.002778359	0.030684114
CDKL5	126.0036223	-1.61394609	0.539900876	-2.989337788	0.002795829	0.030857663
DCLK2	219.9572503	-1.542688572	0.51611349	-2.989049119	0.002798471	0.030867455
ZDHHC17	1241.232934	-1.4404698	0.482202698	-2.987270304	0.002814807	0.031028176
CWH43	431.0393311	2.112630504	0.707343193	2.986712145	0.002819951	0.031046582
MAGEE1	192.5187401	-2.06351271	0.690899196	-2.986705907	0.002820009	0.031046582
BOLA3	478.9510479	1.166993	0.390818363	2.986023971	0.002826305	0.031076981
SH3PXD2A	5966.639243	-1.72864741	0.578892746	-2.98612726	0.00282535	0.031076981
SSC5D	1216.139004	-2.262459643	0.758698706	-2.982026495	0.002863472	0.03146598
RECQL4	417.5004503	1.747942663	0.586509783	2.980244683	0.002880182	0.03161009
TXNL4A	1208.940409	1.197594254	0.401837286	2.980296495	0.002879695	0.03161009
MAF	2095.21943	-1.778428442	0.596954807	-2.979167637	0.002890326	0.031694118
SLC1A2	408.3126961	-1.763651885	0.59201839	-2.979049158	0.002891444	0.031694118
DDX11	667.6400267	1.522738242	0.511259196	2.978407537	0.002897504	0.031740761
ST14	5438.42345	1.603982906	0.53861937	2.97795251	0.002901809	0.031768128
FOXS1	131.1256448	-1.518692232	0.510097079	-2.977261179	0.002908361	0.031820043
DKC1	1914.36333	1.100250357	0.369620606	2.976701891	0.002913672	0.031838518
PRC1	739.7673606	1.888908455	0.634553062	2.976754142	0.002913175	0.031838518
NPAS4	74.45987177	-2.699670213	0.907242102	-2.975688857	0.002923313	0.031924029
TUBB6	1790.350873	-1.545982907	0.519654881	-2.975018543	0.002929708	0.031974012
PIK3CD	460.5741229	-1.372040707	0.461384356	-2.973747784	0.002941868	0.032047038
PRSS3P2	23.72581943	2.837693524	0.954201729	2.973892666	0.002940479	0.032047038
ZDHHC14	806.4816939	-1.46934958	0.494090942	-2.973844397	0.002940942	0.032047038
HIST1H3H	56.02066238	2.115407847	0.71147361	2.973276614	0.002946388	0.032075164
MKX	175.3954498	1.762943501	0.593039455	2.972725483	0.002951683	0.032075164
PBXIP1	4194.287576	-1.295466024	0.435748022	-2.972970518	0.002949328	0.032075164
PCDHB15	233.4051277	-1.865658588	0.627593353	-2.972718844	0.002951747	0.032075164
PIFO	1113.89502	1.851220884	0.623068226	2.97113672	0.002966997	0.03222096
PPM1M	777.0200278	-1.107138129	0.372860983	-2.969305394	0.002984738	0.032393619
AK4	3478.718669	1.625290678	0.547539704	2.968352187	0.002994011	0.0324596
SDK2	500.7798391	-1.968332436	0.663159866	-2.968111517	0.002996356	0.0324596
TIMP2	24488.90388	-1.952760217	0.657895436	-2.968192374	0.002995568	0.0324596
ARHGEF39	142.3049436	1.871579211	0.630706266	2.967433988	0.003002968	0.032511192
NLRP3	152.3611839	-1.474236325	0.496866481	-2.967067372	0.003006551	0.032529954
DTYMK	580.7419543	1.409582685	0.475122198	2.966779268	0.003009369	0.032540424
RHOJ	924.3803242	-1.637031401	0.552516052	-2.962866684	0.003047885	0.032936645
CCDC150	72.36618396	1.746854333	0.589626367	2.962646228	0.003050069	0.032939995
CDCA3	285.2599396	2.093634183	0.706728464	2.962430818	0.003052204	0.032942817
TCEAL4	5721.138239	-1.525466249	0.515067922	-2.961679778	0.003059658	0.033003012
CACNA1G	332.3111544	-2.228173469	0.752468075	-2.961153494	0.003064892	0.033039192
CLK1	4573.28297	-1.359134408	0.459191422	-2.959842763	0.003077961	0.033159748
ODF3L1	32.64858039	-2.399166494	0.81108125	-2.957985399	0.003096568	0.033339778
CNTN4	558.5896699	-1.806523025	0.61090288	-2.957136207	0.003105109	0.033411279
LOC101928034	22.94122822	-2.628713485	0.889139522	-2.956469059	0.003111835	0.033422989
TDP1	953.9242607	1.228806066	0.415613449	2.956608045	0.003110432	0.033422989
TLCD1	398.6560689	1.507160459	0.509785071	2.956462526	0.0031119	0.033422989
FMOD	4053.717569	-1.795431064	0.607374956	-2.956050536	0.00311606	0.033447236
CHST8	25.77573965	-2.684428715	0.908253154	-2.955595257	0.003120663	0.033472364
LTBP4	6783.772583	-1.654596128	0.559847174	-2.955442495	0.003122209	0.033472364
LDLRAD4	1918.369031	-1.51267441	0.511877145	-2.955151296	0.003125158	0.033483559
PCDHGC3	1084.376846	-1.371826935	0.464269527	-2.954807186	0.003128645	0.033500511
RPS6KA6	155.3097307	-2.518037533	0.852339874	-2.95426462	0.003134151	0.033539044
CASC5	262.5251345	1.635713631	0.553768269	2.95378721	0.003139004	0.033570537
PPFIA2	186.4629964	-1.851296804	0.626866751	-2.953254103	0.00314443	0.033608128
SGPP1	597.9751525	-1.120138871	0.37931529	-2.953054884	0.00314646	0.033609394
RASSF8-AS1	93.31745431	-1.637503715	0.554574852	-2.952719025	0.003149885	0.033625551
IL18	646.3127006	1.402505602	0.475311502	2.950708316	0.003170462	0.033824671
ASPM	413.9613174	1.776269315	0.602031759	2.950457826	0.003173034	0.033831581
HLA-H	311.6879947	-1.621220664	0.549589694	-2.949874575	0.00317903	0.033844679
PRX	142.208864	-1.815215374	0.615373831	-2.949776678	0.003180037	0.033844679
TSSC1	829.1787055	1.169555382	0.396469686	2.949923851	0.003178523	0.033844679
NEK7	1468.564236	-1.259292909	0.427345929	-2.946776422	0.003211053	0.034154102
SULT2B1	1395.472579	1.390107649	0.471795464	2.946420125	0.003214754	0.0341728
MYO5B	3421.857355	1.619058038	0.549573057	2.946028769	0.003218825	0.034174743
SOCS1	257.7302122	-1.65414772	0.561479865	-2.946049933	0.003218604	0.034174743
PPIL1	1222.300069	1.109155399	0.376565729	2.945449659	0.003224856	0.034218118
FOXD1	16.23892776	-2.792896769	0.948457208	-2.944673459	0.003232957	0.03428338
ANTXR2	5155.914328	-1.821389306	0.618667971	-2.944049785	0.003239479	0.034297614
GPR17	22.06531845	-2.662330459	0.904262888	-2.944199631	0.003237911	0.034297614
TMEM132A	2772.074471	1.039759234	0.353180819	2.94398557	0.003240151	0.034297614
DND1	240.4503618	1.269436748	0.431330641	2.94307111	0.003249738	0.034378392
TMEM97	1725.770137	1.602080467	0.544419082	2.942733862	0.00325328	0.034395167
SERINC1	5416.229747	-1.492472464	0.507233708	-2.942376346	0.003257038	0.034414211
CREBL2	1553.458198	-1.180596088	0.401274908	-2.942112913	0.00325981	0.034416029
STK33	654.1301131	1.307748464	0.444511823	2.941988035	0.003261125	0.034416029
C14orf79	540.1060329	1.252483893	0.425932938	2.940565949	0.003276133	0.034532951
FBLN5	3413.744928	-1.806007383	0.61416233	-2.940602663	0.003275744	0.034532951
SOX7	455.934611	-1.377765401	0.468590005	-2.940236423	0.003279619	0.034548988
TBC1D7	724.865572	1.316450024	0.447951489	2.938822747	0.003294614	0.034686173
NDUFA7	1444.788255	1.186824387	0.403973933	2.937873687	0.003304716	0.034771707
DCHS1	2909.426336	-1.892355686	0.644212932	-2.937469264	0.00330903	0.03477547
MME	1715.068063	-1.53408164	0.52222505	-2.937587236	0.003307771	0.03477547
C1orf53	70.07659265	1.911242329	0.650783978	2.936830645	0.003315851	0.034826343
GCAT	495.1584584	1.382674816	0.470912121	2.936163147	0.003322995	0.034880537
PLXDC2	3425.301145	-1.039456277	0.3543284	-2.933595721	0.003350603	0.03513032
RAPGEF4	331.7816368	-1.460334342	0.497799623	-2.933578645	0.003350788	0.03513032
PNPLA3	132.0950882	1.928037817	0.657339098	2.933094687	0.003356015	0.03516416
CLVS2	14.6788115	-2.881083513	0.982695155	-2.931818172	0.00336984	0.035287983
CLEC2B	1026.568537	-1.846159939	0.629873023	-2.931003351	0.003378691	0.035359614
CDC25A	266.8014331	2.004006943	0.683893651	2.930290318	0.003386455	0.035419776
ABCC8	62.67516085	-2.499595492	0.853078345	-2.930089021	0.003388649	0.035421658
OGDHL	301.5168319	1.672113493	0.570735498	2.929752047	0.003392326	0.03543902
PRF1	163.9698045	-2.107984575	0.719935165	-2.92802002	0.003411281	0.035615878
KLRG2	74.35164541	2.567212743	0.876938071	2.927473247	0.003417285	0.035657387
CDH11	5889.266924	-1.909502431	0.652395425	-2.926909599	0.003423484	0.035679722
KANK2	9759.896309	-1.825101705	0.62353155	-2.927039869	0.00342205	0.035679722
CEBPD	6365.851356	-1.35068371	0.461609857	-2.926028741	0.003433192	0.035738535
GAD1	947.8967075	2.003189074	0.68459977	2.926073251	0.003432701	0.035738535
BHLHE22	27.03697607	-2.835848365	0.969309924	-2.925636367	0.003437525	0.035762462
GINS4	295.3527077	1.782842142	0.60986869	2.923321317	0.003463189	0.035986876
SARDH	131.7575307	-2.077360821	0.710603203	-2.923376665	0.003462574	0.035986876
COX5A	2733.680862	1.236589946	0.423418125	2.920493651	0.003494773	0.036293622
KNSTRN	436.0808294	1.455425809	0.498528805	2.919441754	0.003506589	0.036392629
TUFT1	519.1228695	1.124749759	0.38528371	2.9192767	0.003508447	0.036392629
GTF3A	3318.918152	1.010522714	0.346179849	2.919068563	0.00351079	0.036395465
PNMA2	144.7438587	-1.606089993	0.55035141	-2.91829904	0.003519467	0.036463913
THOC3	626.3211174	1.286269885	0.440986891	2.916798459	0.003536442	0.036618212
CKAP2	831.0321156	1.496522809	0.513103856	2.916607999	0.003538602	0.036619011
HIST3H2A	275.521506	1.344463181	0.461324012	2.914357685	0.003564213	0.036832515
4-Sep	285.6627047	-1.601323629	0.549431845	-2.914508223	0.003562494	0.036832515
TOMM34	1572.632484	1.223225879	0.419740468	2.91424338	0.003565518	0.036832515
FLT4	607.1313946	-1.549170856	0.531664592	-2.913812355	0.003570444	0.036861747
EFNA3	212.5110877	1.445283051	0.496095606	2.913315567	0.00357613	0.036877138
WDR18	1360.250827	1.431816991	0.491445541	2.913480484	0.003574242	0.036877138
SGK223	926.1650222	1.211520338	0.415886492	2.913103363	0.003578561	0.036880577
AZU1	17.89537906	2.806238366	0.963540883	2.912422726	0.003586369	0.036917766
PIM1	3235.956687	-2.123883812	0.729228222	-2.912509072	0.003585378	0.036917766
TAGAP	459.8517495	-1.537766847	0.528491519	-2.909728522	0.003617428	0.037215695
RGS7BP	163.020698	-1.868960748	0.642494649	-2.90891255	0.003626883	0.037291144
ENOX1	121.494481	-2.050914689	0.705207509	-2.908242839	0.00363466	0.037307442
HSPA8	70412.98204	0.985710024	0.338937832	2.908232519	0.00363478	0.037307442
SMAGP	974.5097645	1.071103762	0.368301183	2.908227861	0.003634834	0.037307442
ARVCF	587.3019234	1.150525391	0.395825082	2.90665105	0.003653205	0.037474122
LINC00958	456.8988477	1.633259567	0.562067459	2.905807015	0.003663073	0.037531555
VAMP2	3140.844893	-1.266910113	0.435989614	-2.905826358	0.003662847	0.037531555
SMIM6	394.7280149	2.204575887	0.758806006	2.905322137	0.003668753	0.037567859
BRCA1	547.1229049	1.250857923	0.430672585	2.904428945	0.003679237	0.037653286
WASF3	493.9122372	-1.229409451	0.423405284	-2.903623308	0.003688717	0.037728342
MEOX2	80.21327604	-2.610263214	0.899175268	-2.902952637	0.003696625	0.037783287
MRPS17	383.8317823	1.318222803	0.454120587	2.902803441	0.003698387	0.037783287
PANK1	575.6360052	1.177360508	0.405620461	2.902616165	0.003700599	0.037783931
SKP2	909.1969178	1.398380607	0.482001498	2.901195561	0.003717418	0.037933629
NIT2	1045.81239	1.053596493	0.363309969	2.899993346	0.003731706	0.038057339
ADRB2	321.4311503	-2.518837306	0.869035771	-2.898427649	0.003750388	0.038225697
EVC	842.3633148	-1.891657403	0.65277494	-2.897870747	0.003757054	0.038271449
MT2A	5450.358214	-1.6101037	0.555813901	-2.896839566	0.003769425	0.038361802
PHGDH	1938.437896	1.52595026	0.526776871	2.896767765	0.003770287	0.038361802
PTPRZ1	90.38980154	-2.772290145	0.957171284	-2.89633652	0.003775473	0.038392346
CD99L2	1551.367541	-1.374355422	0.474669289	-2.895395705	0.003786808	0.038463123
LSM7	2306.096049	1.103359008	0.381055209	2.895535823	0.003785118	0.038463123
PCYOX1	5273.211049	-1.061143428	0.366572152	-2.894773706	0.00379432	0.038517163
AASS	1319.140077	-1.565722087	0.540971539	-2.894278113	0.003800314	0.038555753
LRFN4	716.9446431	1.421959972	0.491372504	2.893853357	0.003805458	0.03858568
MYOZ2	13.44042862	-2.844074126	0.983103403	-2.892955226	0.003816357	0.038673884
LRRC8C	721.6695068	-1.678105507	0.580206517	-2.892255528	0.003824867	0.038737797
NBEA	587.5976817	-1.162644359	0.402012476	-2.892060396	0.003827244	0.03873955
TNRC6C	871.9212404	-1.279261745	0.442490234	-2.8910508	0.003839561	0.03884186
CTNND2	1047.866058	2.388764665	0.826481967	2.890280443	0.003848983	0.038914789
PYGO1	490.3154319	-2.004456738	0.693584805	-2.889995172	0.003852477	0.038927735
LAMB2	7601.597663	-1.204536205	0.416861502	-2.88953573	0.003858112	0.038939907
PCDHB5	294.065641	-1.752748547	0.606583515	-2.889542008	0.003858035	0.038939907
EFNA4	296.7201096	1.277440473	0.442261939	2.888425071	0.003871763	0.039055267
E2F2	227.8554331	2.210244016	0.76528785	2.888121136	0.003875506	0.03907061
YARS	3049.077485	1.138296491	0.394269792	2.887100444	0.003888101	0.039175123
CD3E	300.7817869	-1.614963143	0.559479458	-2.886545915	0.003894959	0.039199297
PMEPA1	8151.62811	-1.748779396	0.605800274	-2.88672599	0.003892731	0.039199297
GS1-259H13.2	25.16962312	-2.253815557	0.781169296	-2.885181957	0.003911875	0.039347017
ZNF667-AS1	506.4157147	-1.92608959	0.667687993	-2.884715034	0.003917681	0.039382886
C2orf54	302.183171	2.061815276	0.715184797	2.882912619	0.003940167	0.039512923
FSTL3	1088.676402	-1.666502326	0.578010569	-2.8831693	0.003936958	0.039512923
NOP14	2052.998457	1.11494443	0.386739064	2.882937193	0.00393986	0.039512923
RUNX3	1493.016465	-2.322529779	0.805637495	-2.882847177	0.003940986	0.039512923
TICRR	253.2214569	2.215702324	0.76859975	2.882777835	0.003941853	0.039512923
GLYCTK	1016.952558	2.220163534	0.770309604	2.882170394	0.003949461	0.039552454
RYR3	277.8077864	-1.803758964	0.625848031	-2.882103761	0.003950296	0.039552454
RPLP0	83418.88305	1.128241567	0.391717432	2.880243444	0.003973682	0.039763961
SASH1	1732.935146	-1.272316826	0.441847179	-2.87954045	0.003982552	0.039830051
RASD2	168.4807395	-1.404072579	0.487675659	-2.87911146	0.003987974	0.03983895
SNHG18	438.7085378	-1.503609081	0.522236029	-2.879175311	0.003987166	0.03983895
MGC72080	362.0510038	1.448675968	0.503202816	2.878910695	0.003990513	0.039841682
MRVI1	3201.021419	-1.857868244	0.645516303	-2.878112039	0.00400063	0.039920023
NRROS	164.8883958	-1.418033084	0.492744848	-2.877824274	0.004004281	0.039933791
ASB5	32.20105197	-2.765943	0.961331498	-2.877200015	0.004012212	0.039990198
CCL11	27.64955651	-2.774951079	0.96459229	-2.876812419	0.004017143	0.040016663
OLA1	3551.709044	1.019921547	0.354683029	2.875585981	0.004032783	0.040149711
SGIP1	988.2270121	-1.6548367	0.575687706	-2.874538891	0.004046179	0.040260286
LOC101928834	20.66903527	-2.695761807	0.938002047	-2.873940217	0.004053857	0.040313864
CLDN7	4073.319975	1.591646785	0.553989772	2.873061678	0.004065147	0.040403291
APRT	2739.206602	1.278733742	0.44520348	2.872245613	0.004075661	0.040484896
CPNE8	362.1684467	-1.59700423	0.556079086	-2.871901265	0.004080104	0.04050615
FOXJ1	3371.801688	2.085638987	0.726364167	2.871340689	0.004087347	0.04055516
SEMA6B	415.0475821	-1.515468955	0.527978539	-2.870323021	0.004100527	0.040662978
TNNC1	374.4886168	2.156916315	0.751535426	2.87001283	0.004104551	0.040679946
DNAH6	543.039053	1.784176418	0.622137954	2.867814776	0.004133174	0.040940547
EBF3	68.7963339	-1.700493448	0.593067932	-2.867282745	0.004140129	0.040980395
MOGAT1	92.64798056	2.631827429	0.91792438	2.86715059	0.004141859	0.040980395
GDNF	40.88882891	-2.117551666	0.738894703	-2.865836847	0.004159085	0.041127693
LINC01106	395.9009749	1.472856773	0.514043956	2.865235073	0.004166998	0.041159638
STAC	196.1268922	-2.132199117	0.744134073	-2.865342679	0.004165582	0.041159638
LSM4	1659.278499	1.173980887	0.409870959	2.8642695	0.004179722	0.041250011
TRIM36	142.9579965	1.555130434	0.542957425	2.864184857	0.004180839	0.041250011
ZNF521	635.6735381	-1.867703088	0.652294111	-2.863283689	0.00419275	0.041344323
CLUH	3339.729795	1.397576658	0.488206614	2.862674571	0.004200818	0.04140066
DLG2	81.66638028	-2.002680813	0.699735176	-2.862055362	0.004209034	0.041458393
SNORD88B	21.85168419	2.306399914	0.805943578	2.861738683	0.004213241	0.0414766
SLC16A14	417.7503341	-1.52355743	0.532427162	-2.861532128	0.004215988	0.041480412
OSBPL1A	2114.967515	-1.016230872	0.35517697	-2.861195851	0.004220462	0.041501214
DOPEY2	1272.169753	1.07868569	0.377231731	2.859477616	0.004243394	0.041683743
USHBP1	94.96719697	-1.56326023	0.546699667	-2.859449758	0.004243766	0.041683743
DSG2	3990.385064	1.220652425	0.426914881	2.859240754	0.004246564	0.041687929
ESAM	1008.359025	-1.353842735	0.473541023	-2.858976663	0.004250101	0.041699368
LCAT	195.6439132	-1.502364237	0.525692756	-2.857875099	0.004264882	0.041797748
OLFML1	1214.746703	-1.955539915	0.68422775	-2.858024853	0.00426287	0.041797748
RASA3	1047.903693	-1.306317631	0.457195037	-2.857243681	0.004273376	0.041834355
ZFHX2	294.471307	1.262270872	0.441759142	2.857373516	0.004271628	0.041834355
ANLN	703.9932343	1.888061701	0.660931238	2.856668883	0.004281122	0.041886858
FAM83D	306.8187131	2.013823822	0.705193021	2.855705831	0.004294128	0.041989352
KARS	6725.279229	1.019591934	0.357057511	2.8555398	0.004296374	0.041989352
LINC00667	516.0408731	-1.917621712	0.671599626	-2.855304915	0.004299553	0.041997077
DLGAP1	443.6264915	1.645645658	0.576524931	2.854422369	0.004311517	0.042090554
PAM	23721.26124	-1.224183577	0.428948476	-2.853917537	0.004318374	0.042134101
POPDC3	135.7543464	1.966076179	0.689052085	2.853305608	0.004326699	0.042191915
MIR21	54.19880378	-2.353869995	0.825249072	-2.852314623	0.004340212	0.04227679
SLC2A10	1361.452093	-1.579687511	0.553820673	-2.852344792	0.0043398	0.04227679
MN1	93.91328282	-2.041187629	0.716065212	-2.850561086	0.004364217	0.042487075
LIMS3-LOC440895	45.61062955	2.368771828	0.831071033	2.850263979	0.004368296	0.042503252
RTKN	1465.844987	1.297342907	0.455285073	2.849517772	0.004378556	0.042555982
ZFPM2	208.7535025	-2.123014874	0.745036838	-2.849543494	0.004378202	0.042555982
LRRC2	176.4836538	-2.419676152	0.849443167	-2.848543899	0.004391979	0.042662863
CES3	630.0243819	2.164824645	0.760037168	2.848314183	0.004395151	0.042670098
ECT2	1260.527597	1.181764825	0.414984518	2.847732321	0.004403194	0.042724593
INPP5D	801.958235	-1.448666929	0.508745764	-2.84752627	0.004406046	0.04272868
ABCC4	2456.647575	1.314541965	0.461724876	2.847024351	0.004412999	0.042772515
HSD11B2	1534.295458	1.860138393	0.653488594	2.846474154	0.004420632	0.042822891
SORBS3	4521.651879	-1.391693638	0.488967316	-2.846189493	0.004424586	0.042837591
C1QTNF2	78.15914979	-2.475104568	0.869814196	-2.845555499	0.004433403	0.042899338
CNTNAP1	976.844632	-1.755079371	0.61700771	-2.844501523	0.004448097	0.042994198
TENM3	547.7272727	-2.136504645	0.751081496	-2.844571004	0.004447127	0.042994198
GLDN	108.7135483	-2.137089703	0.751480194	-2.843840358	0.004457337	0.043012573
LOC440461	96.5603331	2.38300393	0.837923123	2.843941006	0.00445593	0.043012573
TPMT	961.4799862	1.033210223	0.363308026	2.843895946	0.00445656	0.043012573
PPM1H	2666.725143	1.23057649	0.432773867	2.843463028	0.004462619	0.043027184
TIPARP	2899.355973	-1.354667236	0.476428065	-2.84338253	0.004463746	0.043027184
ATAD3A	1127.657284	1.32725408	0.467127453	2.841310381	0.004492856	0.043284053
FAM13C	226.7927385	-1.743116999	0.613769961	-2.840016799	0.004511116	0.043436165
PDCD2L	295.6616781	1.369383027	0.482274181	2.839428444	0.004519443	0.043492527
P3H2-AS1	87.02758177	-2.45099584	0.863499269	-2.838445763	0.004533382	0.043602805
EARS2	1220.472434	1.170165841	0.412335925	2.837894468	0.004541219	0.043654303
MTHFD1	2760.176116	1.181424059	0.416483407	2.836665374	0.004558736	0.043798744
GRHL1	623.1731033	1.318430507	0.464873824	2.83610399	0.004566757	0.043851845
LRRC45	564.3824913	1.232180764	0.434607929	2.83515482	0.004580348	0.043958342
JPH4	334.9927774	-2.26641095	0.799785252	-2.833774373	0.00460018	0.044124584
SLC24A5	19.3900494	2.484044958	0.876774206	2.83316382	0.004608976	0.04418485
FASTKD1	585.3363277	1.108409292	0.391366686	2.83215034	0.00462361	0.044300991
CLC	24.07104291	-2.635996118	0.931116572	-2.831005479	0.004640193	0.044435657
LINC01132	53.59990083	2.247290275	0.793962042	2.830475712	0.004647884	0.044485082
1-Sep	136.2661349	-1.41473511	0.499974465	-2.82961473	0.004660409	0.044580689
AMBN	60.93438329	2.381832231	0.842346227	2.827616666	0.004689592	0.044811095
TARP	64.29758853	-2.143860681	0.758164742	-2.827697678	0.004688406	0.044811095
BHLHB9	269.8111935	-1.218020093	0.430835713	-2.827110325	0.004697014	0.044844996
RNF43	1281.205424	1.55806474	0.551131958	2.827026665	0.004698242	0.044844996
CREB3L2	4914.414326	-1.220406965	0.431883582	-2.825777634	0.004716599	0.044995795
ARHGEF15	407.3792627	-1.286680264	0.455546079	-2.824478849	0.004735757	0.04515406
ATP11B	1917.284227	-1.220964841	0.432352653	-2.824002199	0.004742806	0.045172272
CCDC137	728.9772496	1.164500784	0.412352386	2.824042794	0.004742205	0.045172272
HABP2	1278.551057	1.979011653	0.700886043	2.823585477	0.004748976	0.04520655
PNMAL2	121.203491	-1.740222559	0.616362187	-2.823376572	0.004752072	0.045211542
MRPS35	2183.736841	1.081102289	0.383013836	2.822619414	0.004763308	0.045293932
DPH2	810.7447527	1.299214943	0.460474834	2.821467859	0.004780443	0.04535874
IFIT1	392.6012628	-1.560852823	0.553181521	-2.821592485	0.004778586	0.04535874
LOC283683	29.73022231	-2.393324349	0.848218422	-2.821589684	0.004778627	0.04535874
VCAM1	1006.14132	-2.169125919	0.768712001	-2.821766691	0.004775991	0.04535874
GARS	3832.365263	0.970733478	0.344227868	2.820031637	0.004801891	0.045530513
POLR1A	1931.86943	1.243903827	0.441114866	2.819909104	0.004803725	0.045530513
NR5A2	396.0345177	-1.5180404	0.53837342	-2.819679324	0.004807166	0.045538576
PCDH7	3406.802417	-1.344413217	0.476928626	-2.818898139	0.004818881	0.045624966
GINS2	277.7010472	2.152962566	0.763901365	2.818377693	0.0048267	0.045649829
SAMD8	1127.671088	-1.168141114	0.414449278	-2.818538178	0.004824287	0.045649829
GPX2	325.2416853	1.620240161	0.57515915	2.817029269	0.004847011	0.045817282
ENPP3	5760.82096	1.353055937	0.48044601	2.816249709	0.004858789	0.045903934
RRS1	893.0685668	1.075206186	0.381875039	2.815596927	0.004868671	0.045972594
RBPMS	3581.61097	-1.086587672	0.386098591	-2.814275158	0.004888736	0.046137285
PPAPDC3	123.9516269	-1.931575676	0.686469885	-2.813780647	0.004896263	0.046183524
BEX4	1138.780505	-1.733044533	0.616082608	-2.81300675	0.004908062	0.046249215
M1AP	311.141496	1.771584782	0.629789585	2.812978848	0.004908488	0.046249215
C12orf45	470.0879187	1.160141414	0.412598649	2.811791594	0.004926641	0.046370561
NACC1	2141.334787	1.027170582	0.365301	2.811847166	0.00492579	0.046370561
HMBS	634.9035705	1.234628034	0.439200531	2.811080464	0.004937544	0.046430041
ITGA4	1116.434356	-1.401373346	0.498525766	-2.811034939	0.004938242	0.046430041
DEPDC1B	164.8782067	2.274768606	0.809607469	2.809717911	0.004958494	0.046595532
AIFM1	3030.256374	1.49132276	0.530950289	2.808780392	0.004972956	0.046706467
BHLHE41	2221.566686	-2.153841785	0.766893738	-2.80852702	0.004976871	0.04671828
PKIA	129.1887114	-2.208269202	0.786530179	-2.807608989	0.004991079	0.046826652
PTGDR2	12.55335612	-2.722906775	0.969909292	-2.807382914	0.004994583	0.04683454
TUBG1	1811.479798	1.30412042	0.46466699	2.806569967	0.005007204	0.046927855
ANKMY2	668.9506356	-1.110975381	0.395887362	-2.806291609	0.005011532	0.046943393
PPP4R4	46.13202173	-2.653093152	0.945525649	-2.805945195	0.005016922	0.046968866
TIMM13	1798.989724	1.199474428	0.427562275	2.805379467	0.005025737	0.047026352
CLEC12A	64.07596507	-1.671037558	0.595774544	-2.804815304	0.005034542	0.047083679
DSC3	397.4486783	-2.343862894	0.835734467	-2.804554541	0.005038616	0.047096731
LINC00665	868.064207	1.5510485	0.553264219	2.803449866	0.005055909	0.04723326
UNC5C	393.8911814	-1.361351337	0.485675503	-2.803005973	0.005062873	0.0472732
HKDC1	748.0745045	1.812090513	0.647086627	2.800383189	0.005104198	0.04763376
GINS1	331.9056899	1.961813301	0.700656537	2.799964314	0.005110826	0.047670311
RPL17	157.2822465	1.35518456	0.48403976	2.799738107	0.005114408	0.047678433
ASUN	1191.693342	1.066275474	0.380909879	2.79928543	0.005121584	0.047694753
SULT1E1	250.0885343	2.51287681	0.897667552	2.799340139	0.005120717	0.047694753
CKMT1A	331.540197	1.7092631	0.610778794	2.79849778	0.005134092	0.047785924
CCDC184	136.5914212	-1.982678863	0.70853846	-2.798265691	0.005137783	0.047794975
LEPROT	4341.889525	-1.19514957	0.427130124	-2.79809244	0.00514054	0.047795331
FAP	1155.147481	-2.080250381	0.743611683	-2.79749556	0.005150048	0.047807886
RASA4	484.8247779	-1.442670343	0.515678235	-2.797617286	0.005148107	0.047807886
TPCN1	2097.708499	-1.114800471	0.398453211	-2.797820267	0.005144873	0.047807886
KCNJ16	123.1666646	1.649228432	0.589624019	2.797084886	0.005156598	0.047843436
HMMR	235.1181353	1.77115816	0.633492353	2.79586352	0.005176125	0.047999281
ARHGAP21	4614.874695	-1.064954701	0.380954381	-2.795491411	0.005182088	0.04802924
RBMS3	699.4768446	-1.552967746	0.555764517	-2.794290925	0.005201366	0.048182519
DUSP5	2124.509983	-1.611568288	0.57683034	-2.793834125	0.005208719	0.048225221
CKMT1B	320.4618843	1.967900348	0.704610865	2.792889589	0.005223952	0.048225686
DNAJB5	545.9915494	-1.849552998	0.662101521	-2.793458315	0.005214775	0.048225686
GAMT	250.840615	-1.557839215	0.557768115	-2.792987218	0.005222376	0.048225686
GJC1	1400.04868	-1.723448721	0.617066238	-2.792971993	0.005222621	0.048225686
LAX1	60.77810434	-1.974795657	0.707099725	-2.79281067	0.005225227	0.048225686
PLA2G2A	84.0066182	-2.734613425	0.979004111	-2.793260411	0.005217967	0.048225686
CDK6	957.7312395	-1.664300846	0.596194227	-2.791541364	0.005245765	0.048389845
VIM	54726.72994	-1.450484888	0.519796417	-2.790486508	0.005262889	0.04852235
LINC01133	623.6669615	1.74688996	0.626184623	2.789736282	0.005275099	0.048609429
DHRS9	85.99680232	-2.067938811	0.741437651	-2.789093337	0.005285583	0.048680524
A2M-AS1	66.28260461	-1.656860611	0.594218905	-2.788300063	0.005298544	0.048758638
BMPER	97.30747485	-2.356498049	0.84515766	-2.788234859	0.005299611	0.048758638
MBNL1	5401.433209	-1.176616108	0.422138188	-2.787277107	0.005315301	0.048856094
TXK	143.5256263	1.911743246	0.685888923	2.787249046	0.005315761	0.048856094
FAM150B	239.0148102	2.054852425	0.737505849	2.78621848	0.005332692	0.048986094
CCDC113	1238.113101	1.618651481	0.581031183	2.78582549	0.005339161	0.049019908
SLCO1B3	294.7952939	-2.186415783	0.784903977	-2.785583775	0.005343143	0.049030868
LAPTM4A	10217.50373	-1.041925039	0.374109581	-2.785079805	0.005351455	0.049081524
VMO1	95.03601322	-2.350830718	0.844182321	-2.784742894	0.005357018	0.049106931
CACNA1G-AS1	19.00464515	-2.554137469	0.91766292	-2.783306827	0.005380789	0.04912449
CCNA2	659.5942348	1.627468433	0.584691525	2.783465063	0.005378165	0.04912449
EXOSC4	623.6607472	1.247328903	0.448151208	2.783276895	0.005381286	0.04912449
GPR22	145.8903758	-2.117237748	0.760453307	-2.784178501	0.005366349	0.04912449
ISCU	2720.92398	-0.989526765	0.355427118	-2.784049709	0.005368481	0.04912449
MGMT	756.0923218	1.030453415	0.370154325	2.783848105	0.005371818	0.04912449
RAB9B	102.1573849	-1.980178991	0.711371217	-2.783608536	0.005375787	0.04912449
SELP	438.1348723	-2.096689699	0.753147373	-2.783903619	0.005370899	0.04912449
WDFY3-AS2	56.46964428	-1.841917593	0.661919206	-2.782692475	0.005390988	0.049187518
TCEAL7	458.732068	-2.029709064	0.729455225	-2.782499864	0.005394189	0.049191197
BMP6	153.5385608	-1.482517088	0.532951312	-2.781712053	0.005407299	0.049285192
ABCA12	148.7852023	1.750520391	0.629541873	2.780625826	0.005425423	0.04942476
SPA17	445.8250722	1.54446561	0.55547292	2.780451672	0.005428334	0.049425669
ADGRL4	878.6818717	-1.634294724	0.588045165	-2.779199323	0.005449308	0.04951407
IARS	5472.306761	0.981649096	0.353188048	2.779395006	0.005446026	0.04951407
LRRC61	534.9428986	1.451408139	0.522211773	2.779347793	0.005446817	0.04951407
PCK2	483.5817043	1.194794643	0.429829574	2.779693895	0.005441016	0.04951407
UCHL3	533.4393518	1.150837904	0.414181889	2.778580944	0.005459691	0.049582792
RAB11FIP5	1096.734904	-1.167658988	0.420275836	-2.778315785	0.005464149	0.049597657
RGCC	1694.535889	-1.602848984	0.577091722	-2.777459672	0.005478564	0.049702843
SH3TC2	135.2069088	-2.126293206	0.765701265	-2.776922677	0.005487623	0.049759356
JUND	11815.36479	-1.120228776	0.403439882	-2.776693194	0.005491499	0.049768831
LTBP3	5154.147661	-1.484348835	0.534693193	-2.776075801	0.005501938	0.04983775
KNCN	13.16674372	2.730431813	0.983666424	2.775770065	0.005507114	0.049858949
MTG1	1055.423416	1.127885936	0.40638641	2.77540269	0.00551334	0.049865178
SNRK	948.6861483	-1.21565113	0.438010173	-2.77539474	0.005513474	0.049865178
CD24	50110.53805	1.531692662	0.552094428	2.774330958	0.005531537	0.050002822
LOC100506834	66.2422839	-2.25642693	0.81344162	-2.773926086	0.005538426	0.050039366
MAPKAPK3	1287.189854	1.05111131	0.379071801	2.772855451	0.00555668	0.050178502
MYO9A	1106.983755	-1.04459588	0.376799197	-2.772287969	0.005566377	0.050214489
SETD7	4417.439828	-1.731104713	0.624413766	-2.77236795	0.005565009	0.050214489
MIR100HG	1986.211938	-2.06686959	0.74573736	-2.771578441	0.005578523	0.050298252
WDR62	176.1705252	1.924433516	0.694552893	2.770751566	0.005592708	0.050400303
ERN1	444.4141416	-1.204934858	0.434955094	-2.770251173	0.005601308	0.050426112
POLD2	4081.325839	1.361436911	0.491421424	2.770406102	0.005598644	0.050426112
KBTBD12	71.26684789	2.15795537	0.779035462	2.770034838	0.00560503	0.050433794
DNM3OS	692.6524075	-1.786926021	0.645252269	-2.769344807	0.005616916	0.05051489
NLE1	742.2241018	1.486212818	0.536735732	2.768984304	0.005623134	0.050544964
ALOXE3	17.51728682	2.722577597	0.983612648	2.76793675	0.00564124	0.050655917
TSLP	57.03844784	-2.24806217	0.812138834	-2.76807619	0.005638827	0.050655917
KCNIP3	146.967126	-1.785845036	0.645538454	-2.766442532	0.005667157	0.050862664
MEX3B	490.6224318	-1.464638128	0.529478924	-2.766187777	0.005671587	0.050876447
AZIN2	106.1882687	-1.634992222	0.591103467	-2.766000054	0.005674853	0.050879784
UBE2Q2P1	123.9287193	-1.39862233	0.50567922	-2.765829158	0.005677827	0.050880508
RDM1	17.85158342	2.371211546	0.857785125	2.764342114	0.00570377	0.051060941
STRA13	1102.140222	1.129287902	0.408497027	2.76449479	0.005701102	0.051060941
CDH8	18.788946	-2.660603273	0.962741498	-2.763569742	0.005717287	0.051155901
LEFTY1	3849.981297	2.452452546	0.888374467	2.760606745	0.00576941	0.051596016
H2AFX	1362.368976	1.510511971	0.547453864	2.759158482	0.005795042	0.051798899
PFKP	3479.265379	1.057550936	0.383441914	2.758047298	0.005814778	0.051883892
RAET1G	24.73917386	-2.178254421	0.789664502	-2.758455543	0.00580752	0.051883892
SFXN4	714.5088695	1.167203671	0.423212892	2.757958686	0.005816355	0.051883892
SIM1	63.48424088	2.520009822	0.913646563	2.758188916	0.00581226	0.051883892
MRTO4	1587.297254	1.208835796	0.438354891	2.757664673	0.005821588	0.051904242
ARNTL2	588.9032119	1.091679719	0.39590074	2.757458144	0.005825267	0.051910717
GSTP1	14783.78755	1.176026835	0.426523805	2.757236108	0.005829224	0.051919667
CCDC86	963.3297874	1.128603761	0.409429501	2.756527699	0.005841866	0.051966491
FBN1	6800.75316	-1.93705717	0.702737529	-2.756444747	0.005843348	0.051966491
WDR86	470.1117255	-1.128853025	0.409529618	-2.756462476	0.005843032	0.051966491
LGR5	3212.154128	2.451345967	0.889639121	2.755438592	0.005861351	0.052083452
TTF2	729.6658796	1.098663731	0.398734211	2.755378644	0.005862425	0.052083452
LOC101929331	57.89861475	-2.258312973	0.81966822	-2.755154974	0.005866434	0.05209275
EEF1B2	20909.22686	0.990081419	0.359394204	2.754861951	0.00587169	0.052113105
FEZF1	39.47499498	2.707778329	0.983632307	2.752835901	0.00590815	0.052357408
KDM1B	1026.4978	1.018188434	0.369825923	2.753155935	0.005902378	0.052357408
MYADM	10788.19555	-1.643858533	0.597121099	-2.752973452	0.005905669	0.052357408
LOC100128770	140.6441394	1.844948464	0.670280761	2.752500999	0.005914197	0.05235821
S100B	140.0471404	-2.337496481	0.849175544	-2.752665805	0.00591122	0.05235821
PCBP3	150.7001133	-2.161509927	0.786076159	-2.749746195	0.005964144	0.052747274
THEMIS	47.67116118	-1.85141813	0.67329857	-2.749772856	0.005963659	0.052747274
CEACAM21	321.6285121	1.847450499	0.671929749	2.749469719	0.005969178	0.052765251
CENPA	126.8519746	2.195217793	0.798470013	2.749280194	0.005972631	0.052769242
GSTCD	608.6983486	1.130627752	0.411290437	2.748976515	0.005978167	0.052791628
AP1S3	365.5650883	1.316990034	0.479267414	2.747923174	0.005997406	0.052921748
RUSC2	1103.75301	-1.476066839	0.537173443	-2.747840309	0.005998922	0.052921748
CEL	120.1597353	2.007344787	0.730770676	2.746887434	0.006016378	0.053049126
CD3EAP	179.846778	1.46398022	0.533082749	2.74625323	0.006028022	0.053099033
SNHG22	38.78735623	2.139790382	0.779168053	2.746250149	0.006028078	0.053099033
NFASC	670.097213	-2.014392225	0.733600431	-2.745898365	0.006034546	0.053129384
KDM1A	4666.455454	1.070614832	0.390027947	2.744969531	0.006051652	0.053253323
FBXL3	1703.134516	-1.060494361	0.386368675	-2.744773138	0.006055274	0.053258544
[truncated: 24,365 more rows]
